# Supplementary material for: Semaglutide vs Tirzepatide for Weight Loss in Adults With Overweight or Obesity
Source: PubMed Central journal article supplement — JAMA Intern Med. 2024 Jul 8;184(9):1056–64. doi: 10.1001/jamainternmed.2024.2525 (PMC11231910; doi:10.1001/jamainternmed.2024.2525), 2024-07-08
Supplement: jamainternmed-e242525-s001.pdf [file jamainternmed-e242525-s001.pdf]

# Supplemental Material: eDefinitions

## Contents

|          |                                            |          |
|----------|--------------------------------------------|----------|
| <b>1</b> | <b>eDefinitions</b>                        | <b>2</b> |
| 1.1      | GLP1 RA Medications . . . . .              | 2        |
| 1.2      | Obesity . . . . .                          | 25       |
| 1.3      | Overweight . . . . .                       | 28       |
| 1.4      | Comorbidities . . . . .                    | 28       |
| 1.4.1    | Asthma . . . . .                           | 28       |
| 1.4.2    | Atrial Fibrillation . . . . .              | 30       |
| 1.4.3    | Bariatric Surgery . . . . .                | 31       |
| 1.4.4    | Chronic Kidney Disease . . . . .           | 32       |
| 1.4.5    | COPD . . . . .                             | 38       |
| 1.4.6    | Glaucoma . . . . .                         | 39       |
| 1.4.7    | Heart Failure . . . . .                    | 51       |
| 1.4.8    | Hyperlipidemia . . . . .                   | 56       |
| 1.4.9    | Hypertension . . . . .                     | 58       |
| 1.4.10   | Major Depressive Disorder . . . . .        | 65       |
| 1.4.11   | Myocardial Infarction . . . . .            | 67       |
| 1.4.12   | Osteoporosis . . . . .                     | 72       |
| 1.5      | Anti-Diabetic Medications (ADMs) . . . . . | 75       |
| 1.5.1    | Metformin . . . . .                        | 75       |
| 1.5.2    | Insulin . . . . .                          | 99       |
| 1.5.3    | Sulfonylurea . . . . .                     | 110      |
| 1.5.4    | SGLT2 Inhibitors . . . . .                 | 120      |
| 1.5.5    | DPP-4 . . . . .                            | 130      |
| 1.6      | Anti-Obesity Medications (AOMS) . . . . .  | 141      |
| 1.6.1    | Orlistat . . . . .                         | 141      |
| 1.6.2    | Phentermine Topiramate . . . . .           | 142      |
| 1.7      | Adverse Events . . . . .                   | 143      |
| 1.7.1    | Bowel Obstruction . . . . .                | 143      |
| 1.7.2    | Cholecystitis . . . . .                    | 150      |
| 1.7.3    | Cholelithiasis . . . . .                   | 151      |
| 1.7.4    | Gastroenteritis . . . . .                  | 153      |
| 1.7.5    | Gastroparesis . . . . .                    | 155      |
| 1.7.6    | Pancreatitis . . . . .                     | 155      |

# 1 eDefinitions

## 1.1 GLP1 RA Medications

The following codes were used to identify previous use of any GLP-1 RA or GLP-1 RA/GIP agonist.

Table 1: Concept codes used to identify GLP-1 RA medications.

| CodeSystem | ConceptCode | ConceptName                                           |
|------------|-------------|-------------------------------------------------------|
| RxNorm     | 1991302     | semaglutide                                           |
| RxNorm     | 2553504     | semaglutide Auto-Injector [Wegovy]                    |
| RxNorm     | 2553506     | 0.5 ML semaglutide 0.5 MG/ML Auto-Injector [Wegovy]   |
| RxNorm     | 2553604     | semaglutide 1 MG/ML Auto-Injector                     |
| RxNorm     | 2553606     | semaglutide 2 MG/ML                                   |
| RxNorm     | 2553700     | semaglutide 2 MG/ML Auto-Injector [Wegovy]            |
| RxNorm     | 2553900     | semaglutide 2.27 MG/ML                                |
| RxNorm     | 2553902     | semaglutide 2.27 MG/ML [Wegovy]                       |
| RxNorm     | 2553904     | semaglutide 2.27 MG/ML Auto-Injector                  |
| RxNorm     | 2554103     | semaglutide 3.2 MG/ML [Wegovy]                        |
| RxNorm     | 2553601     | 0.5 ML semaglutide 1 MG/ML Auto-Injector              |
| RxNorm     | 2553608     | semaglutide 2 MG/ML [Wegovy]                          |
| RxNorm     | 2554101     | semaglutide 3.2 MG/ML                                 |
| RxNorm     | 2553501     | 0.5 ML semaglutide 0.5 MG/ML Auto-Injector            |
| RxNorm     | 2553905     | semaglutide 2.27 MG/ML Auto-Injector [Wegovy]         |
| RxNorm     | 2554102     | 0.75 ML semaglutide 3.2 MG/ML Auto-Injector           |
| RxNorm     | 2553400     | semaglutide 0.5 MG/ML                                 |
| RxNorm     | 2553505     | Wegovy Injectable Product                             |
| RxNorm     | 2553507     | semaglutide 0.5 MG/ML Auto-Injector                   |
| RxNorm     | 2553605     | semaglutide 1 MG/ML Auto-Injector [Wegovy]            |
| RxNorm     | 2553607     | semaglutide 2 MG/ML Auto-Injector                     |
| RxNorm     | 2553901     | 0.75 ML semaglutide 2.27 MG/ML Auto-Injector          |
| RxNorm     | 2553903     | 0.75 ML semaglutide 2.27 MG/ML Auto-Injector [Wegovy] |
| RxNorm     | 2554104     | 0.75 ML semaglutide 3.2 MG/ML Auto-Injector [Wegovy]  |
| RxNorm     | 2553502     | Wegovy                                                |
| RxNorm     | 2553803     | 0.5 ML semaglutide 2 MG/ML Auto-Injector [Wegovy]     |
| RxNorm     | 2554105     | semaglutide 3.2 MG/ML Auto-Injector                   |
| RxNorm     | 2553503     | semaglutide 0.5 MG/ML [Wegovy]                        |
| RxNorm     | 2553802     | 0.5 ML semaglutide 2 MG/ML Auto-Injector              |
| RxNorm     | 2554106     | semaglutide 3.2 MG/ML Auto-Injector [Wegovy]          |
| RxNorm     | 2553508     | semaglutide 0.5 MG/ML Auto-Injector [Wegovy]          |
| RxNorm     | 2553600     | semaglutide 1 MG/ML                                   |
| RxNorm     | 2553602     | semaglutide 1 MG/ML [Wegovy]                          |
| RxNorm     | 2553500     | semaglutide Auto-Injector                             |
| RxNorm     | 2553603     | 0.5 ML semaglutide 1 MG/ML Auto-Injector [Wegovy]     |
| RxNorm     | 2599362     | 3 ML semaglutide 2.68 MG/ML Pen Injector              |
| RxNorm     | 2599365     | 3 ML semaglutide 2.68 MG/ML Pen Injector [Ozempic]    |

Continued on next page

**Table1 – continued from previous page**

| CodeSystem | ConceptCode | ConceptName                                                               |
|------------|-------------|---------------------------------------------------------------------------|
| RxNorm     | 2599361     | semaglutide 2.68 MG/ML                                                    |
| RxNorm     | 2599364     | semaglutide 2.68 MG/ML [Ozempic]                                          |
| RxNorm     | 2599363     | semaglutide 2.68 MG/ML Pen Injector                                       |
| RxNorm     | 2599366     | semaglutide 2.68 MG/ML Pen Injector [Ozempic]                             |
| RxNorm     | 1991303     | semaglutide 1.34 MG/ML                                                    |
| RxNorm     | 1991304     | semaglutide Injectable Product                                            |
| RxNorm     | 1991305     | semaglutide Pen Injector                                                  |
| RxNorm     | 1991306     | 0.25 MG, 0.5 MG Dose 1.5 ML semaglutide 1.34 MG/ML Pen Injector           |
| RxNorm     | 1991307     | Ozempic                                                                   |
| RxNorm     | 1991308     | semaglutide 1.34 MG/ML [Ozempic]                                          |
| RxNorm     | 1991309     | semaglutide Pen Injector [Ozempic]                                        |
| RxNorm     | 1991310     | Ozempic Injectable Product                                                |
| RxNorm     | 1991311     | 0.25 MG, 0.5 MG Dose 1.5 ML semaglutide 1.34 MG/ML Pen Injector [Ozempic] |
| RxNorm     | 1991316     | 1 MG Dose 1.5 ML semaglutide 1.34 MG/ML Pen Injector                      |
| RxNorm     | 1991317     | 1 MG Dose 1.5 ML semaglutide 1.34 MG/ML Pen Injector [Ozempic]            |
| RxNorm     | 2619152     | 0.25 MG, 0.5 MG Dose 3 ML semaglutide 0.68 MG/ML Pen Injector             |
| RxNorm     | 2619154     | 0.25 MG, 0.5 MG Dose 3 ML semaglutide 0.68 MG/ML Pen Injector [Ozempic]   |
| RxNorm     | 2200654     | semaglutide 3 MG Oral Tablet [Rybelsus]                                   |
| RxNorm     | 2200655     | semaglutide 7 MG                                                          |
| RxNorm     | 2200656     | semaglutide 7 MG Oral Tablet                                              |
| RxNorm     | 2200657     | semaglutide 7 MG [Rybelsus]                                               |
| RxNorm     | 2200658     | semaglutide 7 MG Oral Tablet [Rybelsus]                                   |
| RxNorm     | 2200640     | semaglutide 14 MG                                                         |
| RxNorm     | 2200641     | semaglutide Oral Product                                                  |
| RxNorm     | 2200642     | semaglutide Pill                                                          |
| RxNorm     | 2200643     | semaglutide Oral Tablet                                                   |
| RxNorm     | 2200644     | semaglutide 14 MG Oral Tablet                                             |
| RxNorm     | 2200645     | Rybelsus                                                                  |
| RxNorm     | 2200646     | semaglutide 14 MG [Rybelsus]                                              |
| RxNorm     | 2200647     | semaglutide Oral Tablet [Rybelsus]                                        |
| RxNorm     | 2200648     | Rybelsus Oral Product                                                     |
| RxNorm     | 2200649     | Rybelsus Pill                                                             |
| RxNorm     | 2200650     | semaglutide 14 MG Oral Tablet [Rybelsus]                                  |
| RxNorm     | 2200651     | semaglutide 3 MG                                                          |
| RxNorm     | 2200652     | semaglutide 3 MG Oral Tablet                                              |
| RxNorm     | 2200653     | semaglutide 3 MG [Rybelsus]                                               |
| RxNorm     | 2398841     | 3 ML semaglutide 1.34 MG/ML Pen Injector                                  |
| RxNorm     | 2398842     | 3 ML semaglutide 1.34 MG/ML Pen Injector [Ozempic]                        |

Continued on next page

**Table1 – continued from previous page**

| CodeSystem | ConceptCode | ConceptName                                                               |
|------------|-------------|---------------------------------------------------------------------------|
| RxNorm     | 2398843     | semaglutide 1.34 MG/ML Pen Injector                                       |
| RxNorm     | 2398844     | semaglutide 1.34 MG/ML Pen Injector [Ozempic]                             |
| RxNorm     | 2619151     | semaglutide 0.68 MG/ML                                                    |
| RxNorm     | 2619153     | semaglutide 0.68 MG/ML [Ozempic]                                          |
| SNOMED CT  | 764283003   | Semaglutide                                                               |
| SNOMED CT  | 764284009   | Semaglutide-containing product                                            |
| SNOMED CT  | 770768004   | Semaglutide-containing product in parenteral dose form                    |
| SNOMED CT  | 764285005   | Semaglutide-containing product in oral dose form                          |
| SNOMED CT  | 777514008   | Semaglutide only product                                                  |
| SNOMED CT  | 780439007   | Semaglutide only product in oral dose form                                |
| SNOMED CT  | 780440009   | Semaglutide only product in parenteral dose form                          |
| SNOMED CT  | 782102009   | Semaglutide 1.34 mg/mL solution for injection                             |
| SNOMED CT  | 1003647000  | Semaglutide 3 mg oral tablet                                              |
| SNOMED CT  | 1003648005  | Semaglutide 7 mg oral tablet                                              |
| SNOMED CT  | 1003649002  | Semaglutide 14 mg oral tablet                                             |
| NDC        | 500905949   | semaglutide 1.34mg/mL SUBCUTANEOUS INJECTION, SOLUTION                    |
| NDC        | 00169477290 | 3 ML semaglutide 2.68 MG/ML Pen Injector [Ozempic]                        |
| NDC        | 00169477211 | 3 ML semaglutide 2.68 MG/ML Pen Injector [Ozempic]                        |
| NDC        | 001694772   | semaglutide 2.68mg/mL SUBCUTANEOUS INJECTION, SOLUTION                    |
| NDC        | 50090594900 | 3 ML semaglutide 1.34 MG/ML Pen Injector [Ozempic]                        |
| NDC        | 00169477297 | 3 ML semaglutide 2.68 MG/ML Pen Injector [Ozempic]                        |
| NDC        | 00169477212 | 3 ML semaglutide 2.68 MG/ML Pen Injector [Ozempic]                        |
| NDC        | 705182143   | semaglutide 1.34mg/mL SUBCUTANEOUS INJECTION, SOLUTION                    |
| NDC        | 70518214300 | 0.25 MG, 0.5 MG Dose 1.5 ML semaglutide 1.34 MG/ML Pen Injector [Ozempic] |
| NDC        | 001694130   | semaglutide 1.34mg/mL SUBCUTANEOUS INJECTION, SOLUTION                    |
| NDC        | 00169413001 | 3 ML semaglutide 1.34 MG/ML Pen Injector [Ozempic]                        |
| NDC        | 00169413013 | 3 ML semaglutide 1.34 MG/ML Pen Injector [Ozempic]                        |
| NDC        | 001694132   | semaglutide 1.34mg/mL SUBCUTANEOUS INJECTION, SOLUTION                    |
| NDC        | 00169413211 | 0.25 MG, 0.5 MG Dose 1.5 ML semaglutide 1.34 MG/ML Pen Injector [Ozempic] |
| NDC        | 00169413212 | 0.25 MG, 0.5 MG Dose 1.5 ML semaglutide 1.34 MG/ML Pen Injector [Ozempic] |
| NDC        | 00169413290 | 0.25 MG, 0.5 MG Dose 1.5 ML semaglutide 1.34 MG/ML Pen Injector [Ozempic] |
| NDC        | 00169413297 | 0.25 MG, 0.5 MG Dose 1.5 ML semaglutide 1.34 MG/ML Pen Injector [Ozempic] |

Continued on next page

**Table1 – continued from previous page**

| CodeSystem | ConceptCode | ConceptName                                                    |
|------------|-------------|----------------------------------------------------------------|
| NDC        | 001694136   | semaglutide 1.34mg/mL SUBCUTANEOUS INJECTION, SOLUTION         |
| NDC        | 00169413602 | 1 MG Dose 1.5 ML semaglutide 1.34 MG/ML Pen Injector [Ozempic] |
| NDC        | 00169413611 | 1 MG Dose 1.5 ML semaglutide 1.34 MG/ML Pen Injector [Ozempic] |
| NDC        | 001694303   | oral semaglutide 3mg/1 ORAL TABLET                             |
| NDC        | 00169430301 | semaglutide 3 MG Oral Tablet [Rybelsus]                        |
| NDC        | 00169430313 | semaglutide 3 MG Oral Tablet [Rybelsus]                        |
| NDC        | 00169430330 | semaglutide 3 MG Oral Tablet [Rybelsus]                        |
| NDC        | 00169430390 | semaglutide 3 MG Oral Tablet [Rybelsus]                        |
| NDC        | 00169430393 | semaglutide 3 MG Oral Tablet [Rybelsus]                        |
| NDC        | 00169430399 | semaglutide 3 MG Oral Tablet [Rybelsus]                        |
| NDC        | 001694307   | oral semaglutide 7mg/1 ORAL TABLET                             |
| NDC        | 00169430701 | semaglutide 7 MG Oral Tablet [Rybelsus]                        |
| NDC        | 00169430713 | semaglutide 7 MG Oral Tablet [Rybelsus]                        |
| NDC        | 00169430730 | semaglutide 7 MG Oral Tablet [Rybelsus]                        |
| NDC        | 001694314   | oral semaglutide 14mg/1 ORAL TABLET                            |
| NDC        | 00169431401 | semaglutide 14 MG Oral Tablet [Rybelsus]                       |
| NDC        | 00169431413 | semaglutide 14 MG Oral Tablet [Rybelsus]                       |
| NDC        | 00169431430 | semaglutide 14 MG Oral Tablet [Rybelsus]                       |
| NDC        | 001694501   | semaglutide 1mg/.5mL SUBCUTANEOUS INJECTION, SOLUTION          |
| NDC        | 00169450101 | 0.5 ML semaglutide 2 MG/ML Auto-Injector [Wegovy]              |
| NDC        | 00169450114 | 0.5 ML semaglutide 2 MG/ML Auto-Injector [Wegovy]              |
| NDC        | 001694505   | semaglutide .5mg/.5mL SUBCUTANEOUS INJECTION, SOLUTION         |
| NDC        | 00169450501 | 0.5 ML semaglutide 1 MG/ML Auto-Injector [Wegovy]              |
| NDC        | 00169450514 | 0.5 ML semaglutide 1 MG/ML Auto-Injector [Wegovy]              |
| NDC        | 001694517   | semaglutide 1.7mg/.75mL SUBCUTANEOUS INJECTION, SOLUTION       |
| NDC        | 00169451701 | 0.75 ML semaglutide 2.27 MG/ML Auto-Injector [Wegovy]          |
| NDC        | 00169451714 | 0.75 ML semaglutide 2.27 MG/ML Auto-Injector [Wegovy]          |
| NDC        | 001694524   | semaglutide 2.4mg/.75mL SUBCUTANEOUS INJECTION, SOLUTION       |
| NDC        | 00169452401 | 0.75 ML semaglutide 3.2 MG/ML Auto-Injector [Wegovy]           |
| NDC        | 00169452414 | 0.75 ML semaglutide 3.2 MG/ML Auto-Injector [Wegovy]           |
| NDC        | 001694525   | semaglutide .25mg/.5mL SUBCUTANEOUS INJECTION, SOLUTION        |
| NDC        | 00169452501 | 0.5 ML semaglutide 0.5 MG/ML Auto-Injector [Wegovy]            |
| NDC        | 00169452514 | 0.5 ML semaglutide 0.5 MG/ML Auto-Injector [Wegovy]            |
| NDC        | 00169452590 | 0.5 ML semaglutide 0.5 MG/ML Auto-Injector [Wegovy]            |
| NDC        | 00169452594 | 0.5 ML semaglutide 0.5 MG/ML Auto-Injector [Wegovy]            |

Continued on next page

**Table1 – continued from previous page**

| CodeSystem | ConceptCode | ConceptName                                                               |
|------------|-------------|---------------------------------------------------------------------------|
| NDC        | 500905138   | semaglutide 1.34mg/mL SUBCUTANEOUS INJECTION, SOLUTION                    |
| NDC        | 50090513800 | 0.25 MG, 0.5 MG Dose 1.5 ML semaglutide 1.34 MG/ML Pen Injector [Ozempic] |
| NDC        | 500905139   | semaglutide 1.34mg/mL SUBCUTANEOUS INJECTION, SOLUTION                    |
| NDC        | 50090513900 | 1 MG Dose 1.5 ML semaglutide 1.34 MG/ML Pen Injector [Ozempic]            |
| NDC        | 500905824   | semaglutide .25mg/.5mL SUBCUTANEOUS INJECTION, SOLUTION                   |
| NDC        | 50090582400 | 0.5 ML semaglutide 0.5 MG/ML Auto-Injector [Wegovy]                       |
| RxNorm     | 2553502     | Wegovy                                                                    |
| RxNorm     | 2553504     | semaglutide Auto-Injector [Wegovy]                                        |
| RxNorm     | 2553506     | 0.5 ML semaglutide 0.5 MG/ML Auto-Injector [Wegovy]                       |
| RxNorm     | 2553700     | semaglutide 2 MG/ML Auto-Injector [Wegovy]                                |
| RxNorm     | 2553902     | semaglutide 2.27 MG/ML [Wegovy]                                           |
| RxNorm     | 2554103     | semaglutide 3.2 MG/ML [Wegovy]                                            |
| RxNorm     | 2553608     | semaglutide 2 MG/ML [Wegovy]                                              |
| RxNorm     | 2553905     | semaglutide 2.27 MG/ML Auto-Injector [Wegovy]                             |
| RxNorm     | 2553505     | Wegovy Injectable Product                                                 |
| RxNorm     | 2553605     | semaglutide 1 MG/ML Auto-Injector [Wegovy]                                |
| RxNorm     | 2553903     | 0.75 ML semaglutide 2.27 MG/ML Auto-Injector [Wegovy]                     |
| RxNorm     | 2554104     | 0.75 ML semaglutide 3.2 MG/ML Auto-Injector [Wegovy]                      |
| RxNorm     | 2553803     | 0.5 ML semaglutide 2 MG/ML Auto-Injector [Wegovy]                         |
| RxNorm     | 2553503     | semaglutide 0.5 MG/ML [Wegovy]                                            |
| RxNorm     | 2554106     | semaglutide 3.2 MG/ML Auto-Injector [Wegovy]                              |
| RxNorm     | 2553508     | semaglutide 0.5 MG/ML Auto-Injector [Wegovy]                              |
| RxNorm     | 2553602     | semaglutide 1 MG/ML [Wegovy]                                              |
| RxNorm     | 2553603     | 0.5 ML semaglutide 1 MG/ML Auto-Injector [Wegovy]                         |
| NDC        | 001694501   | semaglutide 1mg/.5mL SUBCUTANEOUS INJECTION, SOLUTION                     |
| NDC        | 00169450101 | 0.5 ML semaglutide 2 MG/ML Auto-Injector [Wegovy]                         |
| NDC        | 00169450114 | 0.5 ML semaglutide 2 MG/ML Auto-Injector [Wegovy]                         |
| NDC        | 001694505   | semaglutide .5mg/.5mL SUBCUTANEOUS INJECTION, SOLUTION                    |
| NDC        | 00169450501 | 0.5 ML semaglutide 1 MG/ML Auto-Injector [Wegovy]                         |
| NDC        | 00169450514 | 0.5 ML semaglutide 1 MG/ML Auto-Injector [Wegovy]                         |
| NDC        | 001694517   | semaglutide 1.7mg/.75mL SUBCUTANEOUS INJECTION, SOLUTION                  |
| NDC        | 00169451701 | 0.75 ML semaglutide 2.27 MG/ML Auto-Injector [Wegovy]                     |
| NDC        | 00169451714 | 0.75 ML semaglutide 2.27 MG/ML Auto-Injector [Wegovy]                     |
| NDC        | 001694524   | semaglutide 2.4mg/.75mL SUBCUTANEOUS INJECTION, SOLUTION                  |

Continued on next page

**Table1 – continued from previous page**

| CodeSystem | ConceptCode | ConceptName                                                               |
|------------|-------------|---------------------------------------------------------------------------|
| NDC        | 00169452401 | 0.75 ML semaglutide 3.2 MG/ML Auto-Injector [Wegovy]                      |
| NDC        | 00169452414 | 0.75 ML semaglutide 3.2 MG/ML Auto-Injector [Wegovy]                      |
| NDC        | 001694525   | semaglutide .25mg/.5mL SUBCUTANEOUS INJECTION, SOLUTION                   |
| NDC        | 00169452501 | 0.5 ML semaglutide 0.5 MG/ML Auto-Injector [Wegovy]                       |
| NDC        | 00169452514 | 0.5 ML semaglutide 0.5 MG/ML Auto-Injector [Wegovy]                       |
| NDC        | 00169452590 | 0.5 ML semaglutide 0.5 MG/ML Auto-Injector [Wegovy]                       |
| NDC        | 00169452594 | 0.5 ML semaglutide 0.5 MG/ML Auto-Injector [Wegovy]                       |
| NDC        | 500905824   | semaglutide .25mg/.5mL SUBCUTANEOUS INJECTION, SOLUTION                   |
| NDC        | 50090582400 | 0.5 ML semaglutide 0.5 MG/ML Auto-Injector [Wegovy]                       |
| RxNorm     | 1991307     | Ozempic                                                                   |
| RxNorm     | 2599365     | 3 ML semaglutide 2.68 MG/ML Pen Injector [Ozempic]                        |
| RxNorm     | 2599366     | semaglutide 2.68 MG/ML Pen Injector [Ozempic]                             |
| RxNorm     | 1991308     | semaglutide 1.34 MG/ML [Ozempic]                                          |
| RxNorm     | 1991309     | semaglutide Pen Injector [Ozempic]                                        |
| RxNorm     | 1991310     | Ozempic Injectable Product                                                |
| RxNorm     | 1991311     | 0.25 MG, 0.5 MG Dose 1.5 ML semaglutide 1.34 MG/ML Pen Injector [Ozempic] |
| RxNorm     | 1991317     | 1 MG Dose 1.5 ML semaglutide 1.34 MG/ML Pen Injector [Ozempic]            |
| RxNorm     | 2619154     | 0.25 MG, 0.5 MG Dose 3 ML semaglutide 0.68 MG/ML Pen Injector [Ozempic]   |
| RxNorm     | 2398842     | 3 ML semaglutide 1.34 MG/ML Pen Injector [Ozempic]                        |
| RxNorm     | 2398844     | semaglutide 1.34 MG/ML Pen Injector [Ozempic]                             |
| NDC        | 500905949   | semaglutide 1.34mg/mL SUBCUTANEOUS INJECTION, SOLUTION                    |
| NDC        | 00169477290 | 3 ML semaglutide 2.68 MG/ML Pen Injector [Ozempic]                        |
| NDC        | 00169477211 | 3 ML semaglutide 2.68 MG/ML Pen Injector [Ozempic]                        |
| NDC        | 001694772   | semaglutide 2.68mg/mL SUBCUTANEOUS INJECTION, SOLUTION                    |
| NDC        | 50090594900 | 3 ML semaglutide 1.34 MG/ML Pen Injector [Ozempic]                        |
| NDC        | 00169477297 | 3 ML semaglutide 2.68 MG/ML Pen Injector [Ozempic]                        |
| NDC        | 00169477212 | 3 ML semaglutide 2.68 MG/ML Pen Injector [Ozempic]                        |
| NDC        | 705182143   | semaglutide 1.34mg/mL SUBCUTANEOUS INJECTION, SOLUTION                    |
| NDC        | 70518214300 | 0.25 MG, 0.5 MG Dose 1.5 ML semaglutide 1.34 MG/ML Pen Injector [Ozempic] |
| NDC        | 001694130   | semaglutide 1.34mg/mL SUBCUTANEOUS INJECTION, SOLUTION                    |
| NDC        | 00169413001 | 3 ML semaglutide 1.34 MG/ML Pen Injector [Ozempic]                        |
| NDC        | 00169413013 | 3 ML semaglutide 1.34 MG/ML Pen Injector [Ozempic]                        |

Continued on next page

**Table1 – continued from previous page**

| CodeSystem | ConceptCode | ConceptName                                                               |
|------------|-------------|---------------------------------------------------------------------------|
| NDC        | 001694132   | semaglutide 1.34mg/mL SUBCUTANEOUS INJECTION, SOLUTION                    |
| NDC        | 00169413211 | 0.25 MG, 0.5 MG Dose 1.5 ML semaglutide 1.34 MG/ML Pen Injector [Ozempic] |
| NDC        | 00169413212 | 0.25 MG, 0.5 MG Dose 1.5 ML semaglutide 1.34 MG/ML Pen Injector [Ozempic] |
| NDC        | 00169413290 | 0.25 MG, 0.5 MG Dose 1.5 ML semaglutide 1.34 MG/ML Pen Injector [Ozempic] |
| NDC        | 00169413297 | 0.25 MG, 0.5 MG Dose 1.5 ML semaglutide 1.34 MG/ML Pen Injector [Ozempic] |
| NDC        | 001694136   | semaglutide 1.34mg/mL SUBCUTANEOUS INJECTION, SOLUTION                    |
| NDC        | 00169413602 | 1 MG Dose 1.5 ML semaglutide 1.34 MG/ML Pen Injector [Ozempic]            |
| NDC        | 00169413611 | 1 MG Dose 1.5 ML semaglutide 1.34 MG/ML Pen Injector [Ozempic]            |
| NDC        | 500905138   | semaglutide 1.34mg/mL SUBCUTANEOUS INJECTION, SOLUTION                    |
| NDC        | 50090513800 | 0.25 MG, 0.5 MG Dose 1.5 ML semaglutide 1.34 MG/ML Pen Injector [Ozempic] |
| NDC        | 500905139   | semaglutide 1.34mg/mL SUBCUTANEOUS INJECTION, SOLUTION                    |
| NDC        | 50090513900 | 1 MG Dose 1.5 ML semaglutide 1.34 MG/ML Pen Injector [Ozempic]            |
| RxNorm     | 2601723     | tirzepatide                                                               |
| RxNorm     | 2601742     | tirzepatide 10 MG/ML                                                      |
| RxNorm     | 2601745     | tirzepatide 10 MG/ML [Mounjaro]                                           |
| RxNorm     | 2601744     | tirzepatide 10 MG/ML Auto-Injector                                        |
| RxNorm     | 2601747     | tirzepatide 10 MG/ML Auto-Injector [Mounjaro]                             |
| RxNorm     | 2601778     | tirzepatide 15 MG/ML                                                      |
| RxNorm     | 2601781     | tirzepatide 15 MG/ML [Mounjaro]                                           |
| RxNorm     | 2601780     | tirzepatide 15 MG/ML Auto-Injector                                        |
| RxNorm     | 2601783     | tirzepatide 15 MG/ML Auto-Injector [Mounjaro]                             |
| RxNorm     | 2601736     | Mounjaro Injectable Product                                               |
| RxNorm     | 2601759     | tirzepatide 30 MG/ML Auto-Injector [Mounjaro]                             |
| RxNorm     | 2601760     | tirzepatide 5 MG/ML                                                       |
| RxNorm     | 2601763     | tirzepatide 5 MG/ML [Mounjaro]                                            |
| RxNorm     | 2601762     | tirzepatide 5 MG/ML Auto-Injector                                         |
| RxNorm     | 2601765     | tirzepatide 5 MG/ML Auto-Injector [Mounjaro]                              |
| RxNorm     | 2601731     | tirzepatide Auto-Injector                                                 |
| RxNorm     | 2601737     | tirzepatide Auto-Injector [Mounjaro]                                      |
| RxNorm     | 2601730     | tirzepatide Injectable Product                                            |
| RxNorm     | 2601743     | 0.5 ML tirzepatide 10 MG/ML Auto-Injector                                 |

Continued on next page



**Table1 – continued from previous page**

| CodeSystem | ConceptCode | ConceptName                                          |
|------------|-------------|------------------------------------------------------|
| RxNorm     | 2601746     | 0.5 ML tirzepatide 10 MG/ML Auto-Injector [Mounjaro] |
| RxNorm     | 2601784     | 0.5 ML tirzepatide 15 MG/ML Auto-Injector            |
| RxNorm     | 2601785     | 0.5 ML tirzepatide 15 MG/ML Auto-Injector [Mounjaro] |
| RxNorm     | 2601767     | 0.5 ML tirzepatide 20 MG/ML Auto-Injector            |
| RxNorm     | 2601770     | 0.5 ML tirzepatide 20 MG/ML Auto-Injector [Mounjaro] |
| RxNorm     | 2601773     | 0.5 ML tirzepatide 25 MG/ML Auto-Injector            |
| RxNorm     | 2601761     | 0.5 ML tirzepatide 5 MG/ML Auto-Injector             |
| RxNorm     | 2601764     | 0.5 ML tirzepatide 5 MG/ML Auto-Injector [Mounjaro]  |
| RxNorm     | 2601755     | 0.5 ML tirzepatide 30 MG/ML Auto-Injector            |
| RxNorm     | 2644401     | 0.5 ML tirzepatide 10 MG/ML Injection                |
| RxNorm     | 2644403     | 0.5 ML tirzepatide 10 MG/ML Injection [Mounjaro]     |
| RxNorm     | 2644396     | 0.5 ML tirzepatide 15 MG/ML Injection                |
| RxNorm     | 2644399     | 0.5 ML tirzepatide 15 MG/ML Injection [Mounjaro]     |
| RxNorm     | 2644417     | 0.5 ML tirzepatide 20 MG/ML Injection                |
| RxNorm     | 2644419     | 0.5 ML tirzepatide 20 MG/ML Injection [Mounjaro]     |
| RxNorm     | 2644413     | 0.5 ML tirzepatide 25 MG/ML Injection                |
| RxNorm     | 2644415     | 0.5 ML tirzepatide 25 MG/ML Injection [Mounjaro]     |
| RxNorm     | 2644409     | 0.5 ML tirzepatide 30 MG/ML Injection                |
| RxNorm     | 2644411     | 0.5 ML tirzepatide 30 MG/ML Injection [Mounjaro]     |
| RxNorm     | 2644405     | 0.5 ML tirzepatide 5 MG/ML Injection                 |
| RxNorm     | 2644407     | 0.5 ML tirzepatide 5 MG/ML Injection [Mounjaro]      |
| RxNorm     | 2601769     | tirzepatide 20 MG/ML [Mounjaro]                      |
| RxNorm     | 2601757     | tirzepatide 30 MG/ML [Mounjaro]                      |
| RxNorm     | 2644402     | tirzepatide 10 MG/ML Injection                       |
| RxNorm     | 2644404     | tirzepatide 10 MG/ML Injection [Mounjaro]            |
| RxNorm     | 2644397     | tirzepatide 15 MG/ML Injection                       |
| RxNorm     | 2644400     | tirzepatide 15 MG/ML Injection [Mounjaro]            |
| RxNorm     | 2644418     | tirzepatide 20 MG/ML Injection                       |
| RxNorm     | 2644420     | tirzepatide 20 MG/ML Injection [Mounjaro]            |
| RxNorm     | 2644414     | tirzepatide 25 MG/ML Injection                       |
| RxNorm     | 2644416     | tirzepatide 25 MG/ML Injection [Mounjaro]            |
| RxNorm     | 2644410     | tirzepatide 30 MG/ML Injection                       |
| RxNorm     | 2644412     | tirzepatide 30 MG/ML Injection [Mounjaro]            |
| RxNorm     | 2644406     | tirzepatide 5 MG/ML Injection                        |
| RxNorm     | 2644408     | tirzepatide 5 MG/ML Injection [Mounjaro]             |
| RxNorm     | 2644395     | tirzepatide Injection                                |
| RxNorm     | 2644398     | tirzepatide Injection [Mounjaro]                     |
| RxNorm     | 2601776     | 0.5 ML tirzepatide 25 MG/ML Auto-Injector [Mounjaro] |
| RxNorm     | 2601756     | tirzepatide 30 MG/ML Auto-Injector                   |
| RxNorm     | 2601771     | tirzepatide 20 MG/ML Auto-Injector [Mounjaro]        |
| RxNorm     | 2601772     | tirzepatide 25 MG/ML                                 |
| RxNorm     | 2601775     | tirzepatide 25 MG/ML [Mounjaro]                      |
| RxNorm     | 2601774     | tirzepatide 25 MG/ML Auto-Injector                   |

Continued on next page

**Table1 – continued from previous page**

| CodeSystem | ConceptCode | ConceptName                                              |
|------------|-------------|----------------------------------------------------------|
| RxNorm     | 2601768     | tirzepatide 20 MG/ML Auto-Injector                       |
| RxNorm     | 2601777     | tirzepatide 25 MG/ML Auto-Injector [Mounjaro]            |
| RxNorm     | 2601754     | tirzepatide 30 MG/ML                                     |
| RxNorm     | 2601766     | tirzepatide 20 MG/ML                                     |
| RxNorm     | 2601758     | 0.5 ML tirzepatide 30 MG/ML Auto-Injector [Mounjaro]     |
| NDC        | 00002150661 | tirzepatide 2.5mg/.5mL SUBCUTANEOUS INJECTION, SOLUTION  |
| NDC        | 00002147180 | 0.5 ML tirzepatide 20 MG/ML Auto-Injector [Mounjaro]     |
| NDC        | 00002146080 | 0.5 ML tirzepatide 25 MG/ML Auto-Injector [Mounjaro]     |
| NDC        | 00002150680 | 0.5 ML tirzepatide 5 MG/ML Auto-Injector [Mounjaro]      |
| NDC        | 00002145780 | 0.5 ML tirzepatide 30 MG/ML Auto-Injector [Mounjaro]     |
| NDC        | 000021471   | tirzepatide 10mg/.5mL SUBCUTANEOUS INJECTION, SOLUTION   |
| NDC        | 000021460   | tirzepatide 12.5mg/.5mL SUBCUTANEOUS INJECTION, SOLUTION |
| NDC        | 000021484   | tirzepatide 7.5mg/.5mL SUBCUTANEOUS INJECTION, SOLUTION  |
| NDC        | 00002146001 | 0.5 ML tirzepatide 25 MG/ML Auto-Injector [Mounjaro]     |
| NDC        | 00002149580 | 0.5 ML tirzepatide 10 MG/ML Auto-Injector [Mounjaro]     |
| NDC        | 00002148480 | 0.5 ML tirzepatide 15 MG/ML Auto-Injector [Mounjaro]     |
| NDC        | 000021506   | tirzepatide 2.5mg/.5mL SUBCUTANEOUS INJECTION, SOLUTION  |
| NDC        | 00002150601 | 0.5 ML tirzepatide 5 MG/ML Auto-Injector [Mounjaro]      |
| NDC        | 00002145701 | 0.5 ML tirzepatide 30 MG/ML Auto-Injector [Mounjaro]     |
| NDC        | 00002147101 | 0.5 ML tirzepatide 20 MG/ML Auto-Injector [Mounjaro]     |
| NDC        | 00002148401 | 0.5 ML tirzepatide 15 MG/ML Auto-Injector [Mounjaro]     |
| NDC        | 00002149501 | 0.5 ML tirzepatide 10 MG/ML Auto-Injector [Mounjaro]     |
| NDC        | 000021457   | tirzepatide 15mg/.5mL SUBCUTANEOUS INJECTION, SOLUTION   |
| NDC        | 000021495   | tirzepatide 5mg/.5mL SUBCUTANEOUS INJECTION, SOLUTION    |
| RxNorm     | 2601745     | tirzepatide 10 MG/ML [Mounjaro]                          |
| RxNorm     | 2601747     | tirzepatide 10 MG/ML Auto-Injector [Mounjaro]            |
| RxNorm     | 2601781     | tirzepatide 15 MG/ML [Mounjaro]                          |
| RxNorm     | 2601783     | tirzepatide 15 MG/ML Auto-Injector [Mounjaro]            |
| RxNorm     | 2601734     | Mounjaro                                                 |
| RxNorm     | 2601759     | tirzepatide 30 MG/ML Auto-Injector [Mounjaro]            |
| RxNorm     | 2601763     | tirzepatide 5 MG/ML [Mounjaro]                           |
| RxNorm     | 2601765     | tirzepatide 5 MG/ML Auto-Injector [Mounjaro]             |
| RxNorm     | 2601737     | tirzepatide Auto-Injector [Mounjaro]                     |
| RxNorm     | 2601746     | 0.5 ML tirzepatide 10 MG/ML Auto-Injector [Mounjaro]     |
| RxNorm     | 2601785     | 0.5 ML tirzepatide 15 MG/ML Auto-Injector [Mounjaro]     |
| RxNorm     | 2601770     | 0.5 ML tirzepatide 20 MG/ML Auto-Injector [Mounjaro]     |

Continued on next page

**Table1 – continued from previous page**

| CodeSystem | ConceptCode | ConceptName                                              |
|------------|-------------|----------------------------------------------------------|
| RxNorm     | 2601764     | 0.5 ML tirzepatide 5 MG/ML Auto-Injector [Mounjaro]      |
| RxNorm     | 2601769     | tirzepatide 20 MG/ML [Mounjaro]                          |
| RxNorm     | 2601757     | tirzepatide 30 MG/ML [Mounjaro]                          |
| RxNorm     | 2601776     | 0.5 ML tirzepatide 25 MG/ML Auto-Injector [Mounjaro]     |
| RxNorm     | 2601771     | tirzepatide 20 MG/ML Auto-Injector [Mounjaro]            |
| RxNorm     | 2601777     | tirzepatide 25 MG/ML Auto-Injector [Mounjaro]            |
| RxNorm     | 2601758     | 0.5 ML tirzepatide 30 MG/ML Auto-Injector [Mounjaro]     |
| RxNorm     | 2644403     | 0.5 ML tirzepatide 10 MG/ML Injection [Mounjaro]         |
| RxNorm     | 2644399     | 0.5 ML tirzepatide 15 MG/ML Injection [Mounjaro]         |
| RxNorm     | 2644419     | 0.5 ML tirzepatide 20 MG/ML Injection [Mounjaro]         |
| RxNorm     | 2644411     | 0.5 ML tirzepatide 30 MG/ML Injection [Mounjaro]         |
| RxNorm     | 2644407     | 0.5 ML tirzepatide 5 MG/ML Injection [Mounjaro]          |
| RxNorm     | 2644404     | tirzepatide 10 MG/ML Injection [Mounjaro]                |
| RxNorm     | 2644400     | tirzepatide 15 MG/ML Injection [Mounjaro]                |
| RxNorm     | 2644420     | tirzepatide 20 MG/ML Injection [Mounjaro]                |
| RxNorm     | 2644412     | tirzepatide 30 MG/ML Injection [Mounjaro]                |
| RxNorm     | 2644408     | tirzepatide 5 MG/ML Injection [Mounjaro]                 |
| NDC        | 00002150661 | tirzepatide 2.5mg/.5mL SUBCUTANEOUS INJECTION, SOLUTION  |
| NDC        | 00002147180 | 0.5 ML tirzepatide 20 MG/ML Auto-Injector [Mounjaro]     |
| NDC        | 00002146080 | 0.5 ML tirzepatide 25 MG/ML Auto-Injector [Mounjaro]     |
| NDC        | 00002150680 | 0.5 ML tirzepatide 5 MG/ML Auto-Injector [Mounjaro]      |
| NDC        | 00002145780 | 0.5 ML tirzepatide 30 MG/ML Auto-Injector [Mounjaro]     |
| NDC        | 000021471   | tirzepatide 10mg/.5mL SUBCUTANEOUS INJECTION, SOLUTION   |
| NDC        | 000021460   | tirzepatide 12.5mg/.5mL SUBCUTANEOUS INJECTION, SOLUTION |
| NDC        | 000021484   | tirzepatide 7.5mg/.5mL SUBCUTANEOUS INJECTION, SOLUTION  |
| NDC        | 00002146001 | 0.5 ML tirzepatide 25 MG/ML Auto-Injector [Mounjaro]     |
| NDC        | 00002149580 | 0.5 ML tirzepatide 10 MG/ML Auto-Injector [Mounjaro]     |
| NDC        | 00002148480 | 0.5 ML tirzepatide 15 MG/ML Auto-Injector [Mounjaro]     |
| NDC        | 000021506   | tirzepatide 2.5mg/.5mL SUBCUTANEOUS INJECTION, SOLUTION  |
| NDC        | 00002150601 | 0.5 ML tirzepatide 5 MG/ML Auto-Injector [Mounjaro]      |
| NDC        | 00002145701 | 0.5 ML tirzepatide 30 MG/ML Auto-Injector [Mounjaro]     |
| NDC        | 00002147101 | 0.5 ML tirzepatide 20 MG/ML Auto-Injector [Mounjaro]     |
| NDC        | 00002148401 | 0.5 ML tirzepatide 15 MG/ML Auto-Injector [Mounjaro]     |
| NDC        | 00002149501 | 0.5 ML tirzepatide 10 MG/ML Auto-Injector [Mounjaro]     |
| NDC        | 000021457   | tirzepatide 15mg/.5mL SUBCUTANEOUS INJECTION, SOLUTION   |
| NDC        | 000021495   | tirzepatide 5mg/.5mL SUBCUTANEOUS INJECTION, SOLUTION    |

Continued on next page

**Table1 – continued from previous page**

| CodeSystem | ConceptCode | ConceptName                                                         |
|------------|-------------|---------------------------------------------------------------------|
| RxNorm     | 1551291     | dulaglutide                                                         |
| RxNorm     | 1551294     | dulaglutide Prefilled Syringe                                       |
| RxNorm     | 1551298     | dulaglutide Prefilled Syringe [Trulicity]                           |
| RxNorm     | 1551292     | dulaglutide 1.5 MG/ML                                               |
| RxNorm     | 1551293     | dulaglutide Injectable Product                                      |
| RxNorm     | 1551295     | 0.5 ML dulaglutide 1.5 MG/ML Auto-Injector                          |
| RxNorm     | 1551296     | Trulicity                                                           |
| RxNorm     | 1551297     | dulaglutide 1.5 MG/ML [Trulicity]                                   |
| RxNorm     | 1551299     | Trulicity Injectable Product                                        |
| RxNorm     | 1551300     | 0.5 ML dulaglutide 1.5 MG/ML Auto-Injector [Trulicity]              |
| RxNorm     | 1551301     | dulaglutide 1.5 MG/ML Auto-Injector                                 |
| RxNorm     | 1551302     | dulaglutide 1.5 MG/ML Auto-Injector [Trulicity]                     |
| RxNorm     | 1551303     | dulaglutide 3 MG/ML                                                 |
| RxNorm     | 1551304     | 0.5 ML dulaglutide 3 MG/ML Auto-Injector                            |
| RxNorm     | 1551305     | dulaglutide 3 MG/ML [Trulicity]                                     |
| RxNorm     | 1551306     | 0.5 ML dulaglutide 3 MG/ML Auto-Injector [Trulicity]                |
| RxNorm     | 1551307     | dulaglutide 3 MG/ML Auto-Injector                                   |
| RxNorm     | 1551308     | dulaglutide 3 MG/ML Auto-Injector [Trulicity]                       |
| RxNorm     | 1649584     | dulaglutide Auto-Injector                                           |
| RxNorm     | 1649586     | dulaglutide Auto-Injector [Trulicity]                               |
| RxNorm     | 2395776     | dulaglutide 6 MG/ML                                                 |
| RxNorm     | 2395777     | 0.5 ML dulaglutide 6 MG/ML Auto-Injector                            |
| RxNorm     | 2395778     | dulaglutide 6 MG/ML [Trulicity]                                     |
| RxNorm     | 2395779     | 0.5 ML dulaglutide 6 MG/ML Auto-Injector [Trulicity]                |
| RxNorm     | 2395780     | dulaglutide 6 MG/ML Auto-Injector                                   |
| RxNorm     | 2395781     | dulaglutide 6 MG/ML Auto-Injector [Trulicity]                       |
| RxNorm     | 2395782     | dulaglutide 9 MG/ML                                                 |
| RxNorm     | 2395783     | 0.5 ML dulaglutide 9 MG/ML Auto-Injector                            |
| RxNorm     | 2395784     | dulaglutide 9 MG/ML [Trulicity]                                     |
| RxNorm     | 2395785     | 0.5 ML dulaglutide 9 MG/ML Auto-Injector [Trulicity]                |
| RxNorm     | 2395786     | dulaglutide 9 MG/ML Auto-Injector                                   |
| RxNorm     | 2395787     | dulaglutide 9 MG/ML Auto-Injector [Trulicity]                       |
| SNOMED CT  | 714080005   | Dulaglutide                                                         |
| SNOMED CT  | 714081009   | Dulaglutide-containing product                                      |
| SNOMED CT  | 775712006   | Dulaglutide only product                                            |
| SNOMED CT  | 1010536005  | Dulaglutide 1.5 mg/mL solution for injection                        |
| SNOMED CT  | 1010537001  | Dulaglutide 3 mg/mL solution for injection                          |
| SNOMED CT  | 1010538006  | Dulaglutide 6 mg/mL solution for injection                          |
| SNOMED CT  | 1010539003  | Dulaglutide 9 mg/mL solution for injection                          |
| SNOMED CT  | 1010540001  | Dulaglutide-containing product in parenteral dose form              |
| SNOMED CT  | 1010541002  | Dulaglutide only product in parenteral dose form                    |
| NDC        | 545680433   | dulaglutide .75mg/.5mL SUBCUTANEOUS INJECTION, SOLUTION [trulicity] |

Continued on next page

**Table1 – continued from previous page**

| CodeSystem | ConceptCode | ConceptName                                                         |
|------------|-------------|---------------------------------------------------------------------|
| NDC        | 54568043363 | 0.5 ML dulaglutide 1.5 MG/ML Auto-Injector [Trulicity]              |
| NDC        | 54568043371 | 0.5 ML dulaglutide 1.5 MG/ML Auto-Injector [Trulicity]              |
| NDC        | 545680434   | dulaglutide 1.5mg/.5mL SUBCUTANEOUS INJECTION, SOLUTION [trulicity] |
| NDC        | 54568043463 | 0.5 ML dulaglutide 3 MG/ML Auto-Injector [Trulicity]                |
| NDC        | 54568043471 | 0.5 ML dulaglutide 3 MG/ML Auto-Injector [Trulicity]                |
| NDC        | 000021433   | dulaglutide .75mg/.5mL SUBCUTANEOUS INJECTION, SOLUTION             |
| NDC        | 00002143301 | 0.5 ML dulaglutide 1.5 MG/ML Auto-Injector [Trulicity]              |
| NDC        | 00002143361 | 0.5 ML dulaglutide 1.5 MG/ML Auto-Injector [Trulicity]              |
| NDC        | 00002143380 | 0.5 ML dulaglutide 1.5 MG/ML Auto-Injector [Trulicity]              |
| NDC        | 000021434   | dulaglutide 1.5mg/.5mL SUBCUTANEOUS INJECTION, SOLUTION             |
| NDC        | 00002143401 | 0.5 ML dulaglutide 3 MG/ML Auto-Injector [Trulicity]                |
| NDC        | 00002143461 | 0.5 ML dulaglutide 3 MG/ML Auto-Injector [Trulicity]                |
| NDC        | 00002143480 | 0.5 ML dulaglutide 3 MG/ML Auto-Injector [Trulicity]                |
| NDC        | 000022236   | dulaglutide 3mg/.5mL SUBCUTANEOUS INJECTION, SOLUTION               |
| NDC        | 00002223601 | 0.5 ML dulaglutide 6 MG/ML Auto-Injector [Trulicity]                |
| NDC        | 00002223661 | 0.5 ML dulaglutide 6 MG/ML Auto-Injector [Trulicity]                |
| NDC        | 00002223680 | 0.5 ML dulaglutide 6 MG/ML Auto-Injector [Trulicity]                |
| NDC        | 000023182   | dulaglutide 4.5mg/.5mL SUBCUTANEOUS INJECTION, SOLUTION             |
| NDC        | 00002318201 | 0.5 ML dulaglutide 9 MG/ML Auto-Injector [Trulicity]                |
| NDC        | 00002318261 | 0.5 ML dulaglutide 9 MG/ML Auto-Injector [Trulicity]                |
| NDC        | 00002318280 | 0.5 ML dulaglutide 9 MG/ML Auto-Injector [Trulicity]                |
| NDC        | 500903483   | dulaglutide 1.5mg/.5mL SUBCUTANEOUS INJECTION, SOLUTION             |
| NDC        | 50090348300 | 0.5 ML dulaglutide 3 MG/ML Auto-Injector [Trulicity]                |
| NDC        | 500903484   | dulaglutide .75mg/.5mL SUBCUTANEOUS INJECTION, SOLUTION             |
| NDC        | 50090348400 | 0.5 ML dulaglutide 1.5 MG/ML Auto-Injector [Trulicity]              |
| NDC        | 500905467   | dulaglutide 3mg/.5mL SUBCUTANEOUS INJECTION, SOLUTION               |
| NDC        | 50090546700 | 0.5 ML dulaglutide 6 MG/ML Auto-Injector [Trulicity]                |
| RxNorm     | 1551296     | Trulicity                                                           |
| RxNorm     | 1551298     | dulaglutide Prefilled Syringe [Trulicity]                           |
| RxNorm     | 1551297     | dulaglutide 1.5 MG/ML [Trulicity]                                   |
| RxNorm     | 1551299     | Trulicity Injectable Product                                        |
| RxNorm     | 1551300     | 0.5 ML dulaglutide 1.5 MG/ML Auto-Injector [Trulicity]              |
| RxNorm     | 1551302     | dulaglutide 1.5 MG/ML Auto-Injector [Trulicity]                     |
| RxNorm     | 1551305     | dulaglutide 3 MG/ML [Trulicity]                                     |
| RxNorm     | 1551306     | 0.5 ML dulaglutide 3 MG/ML Auto-Injector [Trulicity]                |

Continued on next page

**Table1 – continued from previous page**

| CodeSystem | ConceptCode | ConceptName                                                         |
|------------|-------------|---------------------------------------------------------------------|
| RxNorm     | 1551308     | dulaglutide 3 MG/ML Auto-Injector [Trulicity]                       |
| RxNorm     | 1649586     | dulaglutide Auto-Injector [Trulicity]                               |
| RxNorm     | 2395778     | dulaglutide 6 MG/ML [Trulicity]                                     |
| RxNorm     | 2395779     | 0.5 ML dulaglutide 6 MG/ML Auto-Injector [Trulicity]                |
| RxNorm     | 2395781     | dulaglutide 6 MG/ML Auto-Injector [Trulicity]                       |
| RxNorm     | 2395784     | dulaglutide 9 MG/ML [Trulicity]                                     |
| RxNorm     | 2395785     | 0.5 ML dulaglutide 9 MG/ML Auto-Injector [Trulicity]                |
| RxNorm     | 2395787     | dulaglutide 9 MG/ML Auto-Injector [Trulicity]                       |
| NDC        | 545680433   | dulaglutide .75mg/.5mL SUBCUTANEOUS INJECTION, SOLUTION [trulicity] |
| NDC        | 54568043363 | 0.5 ML dulaglutide 1.5 MG/ML Auto-Injector [Trulicity]              |
| NDC        | 54568043371 | 0.5 ML dulaglutide 1.5 MG/ML Auto-Injector [Trulicity]              |
| NDC        | 545680434   | dulaglutide 1.5mg/.5mL SUBCUTANEOUS INJECTION, SOLUTION [trulicity] |
| NDC        | 54568043463 | 0.5 ML dulaglutide 3 MG/ML Auto-Injector [Trulicity]                |
| NDC        | 54568043471 | 0.5 ML dulaglutide 3 MG/ML Auto-Injector [Trulicity]                |
| NDC        | 000021433   | dulaglutide .75mg/.5mL SUBCUTANEOUS INJECTION, SOLUTION             |
| NDC        | 00002143301 | 0.5 ML dulaglutide 1.5 MG/ML Auto-Injector [Trulicity]              |
| NDC        | 00002143361 | 0.5 ML dulaglutide 1.5 MG/ML Auto-Injector [Trulicity]              |
| NDC        | 00002143380 | 0.5 ML dulaglutide 1.5 MG/ML Auto-Injector [Trulicity]              |
| NDC        | 000021434   | dulaglutide 1.5mg/.5mL SUBCUTANEOUS INJECTION, SOLUTION             |
| NDC        | 00002143401 | 0.5 ML dulaglutide 3 MG/ML Auto-Injector [Trulicity]                |
| NDC        | 00002143461 | 0.5 ML dulaglutide 3 MG/ML Auto-Injector [Trulicity]                |
| NDC        | 00002143480 | 0.5 ML dulaglutide 3 MG/ML Auto-Injector [Trulicity]                |
| NDC        | 000022236   | dulaglutide 3mg/.5mL SUBCUTANEOUS INJECTION, SOLUTION               |
| NDC        | 00002223601 | 0.5 ML dulaglutide 6 MG/ML Auto-Injector [Trulicity]                |
| NDC        | 00002223661 | 0.5 ML dulaglutide 6 MG/ML Auto-Injector [Trulicity]                |
| NDC        | 00002223680 | 0.5 ML dulaglutide 6 MG/ML Auto-Injector [Trulicity]                |
| NDC        | 000023182   | dulaglutide 4.5mg/.5mL SUBCUTANEOUS INJECTION, SOLUTION             |
| NDC        | 00002318201 | 0.5 ML dulaglutide 9 MG/ML Auto-Injector [Trulicity]                |
| NDC        | 00002318261 | 0.5 ML dulaglutide 9 MG/ML Auto-Injector [Trulicity]                |
| NDC        | 00002318280 | 0.5 ML dulaglutide 9 MG/ML Auto-Injector [Trulicity]                |
| NDC        | 500903483   | dulaglutide 1.5mg/.5mL SUBCUTANEOUS INJECTION, SOLUTION             |
| NDC        | 50090348300 | 0.5 ML dulaglutide 3 MG/ML Auto-Injector [Trulicity]                |
| NDC        | 500903484   | dulaglutide .75mg/.5mL SUBCUTANEOUS INJECTION, SOLUTION             |
| NDC        | 50090348400 | 0.5 ML dulaglutide 1.5 MG/ML Auto-Injector [Trulicity]              |

Continued on next page

**Table1 – continued from previous page**

| CodeSystem | ConceptCode | ConceptName                                                                                           |
|------------|-------------|-------------------------------------------------------------------------------------------------------|
| NDC        | 500905467   | dulaglutide 3mg/.5mL SUBCUTANEOUS INJECTION, SOLUTION                                                 |
| NDC        | 50090546700 | 0.5 ML dulaglutide 6 MG/ML Auto-Injector [Trulicity]                                                  |
| RxNorm     | 1440051     | lixisenatide                                                                                          |
| RxNorm     | 1440054     | Lixisenatide Injectable Solution                                                                      |
| RxNorm     | 1440055     | Lixisenatide 0.1 MG/ML Injectable Solution                                                            |
| RxNorm     | 1440057     | Lixisenatide 0.05 MG/ML Injectable Solution                                                           |
| RxNorm     | 1440052     | lixisenatide 0.1 MG/ML                                                                                |
| RxNorm     | 1440053     | lixisenatide Injectable Product                                                                       |
| RxNorm     | 1440056     | lixisenatide 0.05 MG/ML                                                                               |
| RxNorm     | 1858991     | lixisenatide 0.033 MG/ML                                                                              |
| RxNorm     | 1858992     | insulin glargine / lixisenatide Injectable Product                                                    |
| RxNorm     | 1858993     | insulin glargine / lixisenatide Pen Injector                                                          |
| RxNorm     | 1858994     | insulin glargine / lixisenatide                                                                       |
| RxNorm     | 1858995     | 3 ML insulin glargine 100 UNT/ML / lixisenatide 0.033 MG/ML Pen Injector                              |
| RxNorm     | 1858996     | Soliqua                                                                                               |
| RxNorm     | 1858997     | insulin glargine 100 UNT/ML / lixisenatide 0.033 MG/ML [Soliqua]                                      |
| RxNorm     | 1858998     | insulin glargine / lixisenatide Pen Injector [Soliqua]                                                |
| RxNorm     | 1858999     | Soliqua Injectable Product                                                                            |
| RxNorm     | 1859000     | 3 ML insulin glargine 100 UNT/ML / lixisenatide 0.033 MG/ML Pen Injector [Soliqua]                    |
| RxNorm     | 1859001     | insulin glargine 100 UNT/ML / lixisenatide 0.033 MG/ML Pen Injector                                   |
| RxNorm     | 1859002     | insulin glargine 100 UNT/ML / lixisenatide 0.033 MG/ML Pen Injector [Soliqua]                         |
| RxNorm     | 1803885     | lixisenatide Pen Injector                                                                             |
| RxNorm     | 1803886     | lixisenatide 0.05 MG/ML Pen Injector                                                                  |
| RxNorm     | 1803887     | Adlyxin                                                                                               |
| RxNorm     | 1803888     | lixisenatide 0.05 MG/ML [Adlyxin]                                                                     |
| RxNorm     | 1803889     | lixisenatide Pen Injector [Adlyxin]                                                                   |
| RxNorm     | 1803890     | Adlyxin Injectable Product                                                                            |
| RxNorm     | 1803891     | lixisenatide 0.05 MG/ML Pen Injector [Adlyxin]                                                        |
| RxNorm     | 1803892     | 3 ML lixisenatide 0.05 MG/ML Pen Injector                                                             |
| RxNorm     | 1803893     | 3 ML lixisenatide 0.05 MG/ML Pen Injector [Adlyxin]                                                   |
| RxNorm     | 1803894     | 3 ML lixisenatide 0.1 MG/ML Pen Injector                                                              |
| RxNorm     | 1803895     | lixisenatide 0.1 MG/ML [Adlyxin]                                                                      |
| RxNorm     | 1803896     | 3 ML lixisenatide 0.1 MG/ML Pen Injector [Adlyxin]                                                    |
| RxNorm     | 1803897     | lixisenatide 0.1 MG/ML Pen Injector                                                                   |
| RxNorm     | 1803898     | lixisenatide 0.1 MG/ML Pen Injector [Adlyxin]                                                         |
| RxNorm     | 1803902     | { 1 (3 ML lixisenatide 0.05 MG/ML Pen Injector) / 1 (3 ML lixisenatide 0.1 MG/ML Pen Injector) } Pack |

Continued on next page

**Table1 – continued from previous page**

| CodeSystem | ConceptCode | ConceptName                                                                                                                                    |
|------------|-------------|------------------------------------------------------------------------------------------------------------------------------------------------|
| RxNorm     | 1803903     | {1 (3 ML lixisenatide 0.05 MG/ML Pen Injector [Adlyxin]) / 1 (3 ML lixisenatide 0.1 MG/ML Pen Injector [Adlyxin]) } Pack [Adlyxin Starter Kit] |
| SNOMED CT  | 763570007   | Lixisenatide-containing product                                                                                                                |
| SNOMED CT  | 764330009   | Lixisenatide-containing product in parenteral dose form                                                                                        |
| SNOMED CT  | 708808004   | Lixisenatide                                                                                                                                   |
| SNOMED CT  | 776560001   | Lixisenatide only product                                                                                                                      |
| SNOMED CT  | 779728007   | Lixisenatide only product in parenteral dose form                                                                                              |
| NDC        | 00024574000 | 3 ML lixisenatide 0.1 MG/ML Pen Injector [Adlyxin]                                                                                             |
| NDC        | 00024574101 | 3 ML lixisenatide 0.05 MG/ML Pen Injector [Adlyxin]                                                                                            |
| NDC        | 000245745   | lixisenatide KIT                                                                                                                               |
| NDC        | 00024574502 | {1 (3 ML lixisenatide 0.05 MG/ML Pen Injector [Adlyxin]) / 1 (3 ML lixisenatide 0.1 MG/ML Pen Injector [Adlyxin]) } Pack [Adlyxin Starter Kit] |
| NDC        | 000245747   | lixisenatide 100ug/mL SUBCUTANEOUS INJECTION, SOLUTION                                                                                         |
| NDC        | 00024574702 | 3 ML lixisenatide 0.1 MG/ML Pen Injector [Adlyxin]                                                                                             |
| NDC        | 000245761   | insulin glargine and lixisenatide 100U/mL / 33ug/mL SUBCUTANEOUS INJECTION, SOLUTION                                                           |
| NDC        | 00024576101 | 3 ML insulin glargine 100 UNT/ML / lixisenatide 0.033 MG/ML Pen Injector [Soliqua]                                                             |
| NDC        | 00024576102 | 3 ML insulin glargine 100 UNT/ML / lixisenatide 0.033 MG/ML Pen Injector [Soliqua]                                                             |
| NDC        | 00024576105 | 3 ML insulin glargine 100 UNT/ML / lixisenatide 0.033 MG/ML Pen Injector [Soliqua]                                                             |
| NDC        | 00024576302 | 3 ML insulin glargine 100 UNT/ML / lixisenatide 0.033 MG/ML Pen Injector [Soliqua]                                                             |
| RxNorm     | 1858996     | Soliqua                                                                                                                                        |
| RxNorm     | 1858997     | insulin glargine 100 UNT/ML / lixisenatide 0.033 MG/ML [Soliqua]                                                                               |
| RxNorm     | 1858998     | insulin glargine / lixisenatide Pen Injector [Soliqua]                                                                                         |
| RxNorm     | 1858999     | Soliqua Injectable Product                                                                                                                     |
| RxNorm     | 1859000     | 3 ML insulin glargine 100 UNT/ML / lixisenatide 0.033 MG/ML Pen Injector [Soliqua]                                                             |
| RxNorm     | 1859002     | insulin glargine 100 UNT/ML / lixisenatide 0.033 MG/ML Pen Injector [Soliqua]                                                                  |
| NDC        | 000245761   | insulin glargine and lixisenatide 100U/mL / 33ug/mL SUBCUTANEOUS INJECTION, SOLUTION                                                           |
| NDC        | 00024576101 | 3 ML insulin glargine 100 UNT/ML / lixisenatide 0.033 MG/ML Pen Injector [Soliqua]                                                             |
| NDC        | 00024576102 | 3 ML insulin glargine 100 UNT/ML / lixisenatide 0.033 MG/ML Pen Injector [Soliqua]                                                             |

Continued on next page



**Table1 – continued from previous page**

| CodeSystem | ConceptCode | ConceptName                                                                                                                                     |
|------------|-------------|-------------------------------------------------------------------------------------------------------------------------------------------------|
| NDC        | 00024576105 | 3 ML insulin glargine 100 UNT/ML / lixisenatide 0.033 MG/ML Pen Injector [Soliqua]                                                              |
| NDC        | 00024576302 | 3 ML insulin glargine 100 UNT/ML / lixisenatide 0.033 MG/ML Pen Injector [Soliqua]                                                              |
| RxNorm     | 1803887     | Adlyxin                                                                                                                                         |
| RxNorm     | 1803888     | lixisenatide 0.05 MG/ML [Adlyxin]                                                                                                               |
| RxNorm     | 1803889     | lixisenatide Pen Injector [Adlyxin]                                                                                                             |
| RxNorm     | 1803890     | Adlyxin Injectable Product                                                                                                                      |
| RxNorm     | 1803891     | lixisenatide 0.05 MG/ML Pen Injector [Adlyxin]                                                                                                  |
| RxNorm     | 1803893     | 3 ML lixisenatide 0.05 MG/ML Pen Injector [Adlyxin]                                                                                             |
| RxNorm     | 1803895     | lixisenatide 0.1 MG/ML [Adlyxin]                                                                                                                |
| RxNorm     | 1803896     | 3 ML lixisenatide 0.1 MG/ML Pen Injector [Adlyxin]                                                                                              |
| RxNorm     | 1803898     | lixisenatide 0.1 MG/ML Pen Injector [Adlyxin]                                                                                                   |
| RxNorm     | 1803903     | { 1 (3 ML lixisenatide 0.05 MG/ML Pen Injector [Adlyxin]) / 1 (3 ML lixisenatide 0.1 MG/ML Pen Injector [Adlyxin]) } Pack [Adlyxin Starter Kit] |
| NDC        | 00024574000 | 3 ML lixisenatide 0.1 MG/ML Pen Injector [Adlyxin]                                                                                              |
| NDC        | 00024574101 | 3 ML lixisenatide 0.05 MG/ML Pen Injector [Adlyxin]                                                                                             |
| NDC        | 000245745   | lixisenatide KIT                                                                                                                                |
| NDC        | 00024574502 | { 1 (3 ML lixisenatide 0.05 MG/ML Pen Injector [Adlyxin]) / 1 (3 ML lixisenatide 0.1 MG/ML Pen Injector [Adlyxin]) } Pack [Adlyxin Starter Kit] |
| NDC        | 000245747   | lixisenatide 100ug/mL SUBCUTANEOUS INJECTION, SOLUTION                                                                                          |
| NDC        | 00024574702 | 3 ML lixisenatide 0.1 MG/ML Pen Injector [Adlyxin]                                                                                              |
| RxNorm     | 475968      | liraglutide                                                                                                                                     |
| RxNorm     | 1598266     | liraglutide Prefilled Syringe [Saxenda]                                                                                                         |
| RxNorm     | 897125      | liraglutide Prefilled Syringe [Victoza]                                                                                                         |
| RxNorm     | 897121      | liraglutide Prefilled Syringe                                                                                                                   |
| RxNorm     | 897120      | liraglutide 6 MG/ML                                                                                                                             |
| RxNorm     | 897122      | 3 ML liraglutide 6 MG/ML Pen Injector                                                                                                           |
| RxNorm     | 897123      | Victoza                                                                                                                                         |
| RxNorm     | 897124      | liraglutide 6 MG/ML [Victoza]                                                                                                                   |
| RxNorm     | 897126      | 3 ML liraglutide 6 MG/ML Pen Injector [Victoza]                                                                                                 |
| RxNorm     | 1186578     | Victoza Injectable Product                                                                                                                      |
| RxNorm     | 1163230     | liraglutide Injectable Product                                                                                                                  |
| RxNorm     | 1360105     | liraglutide 6 MG/ML Pen Injector                                                                                                                |
| RxNorm     | 1360495     | liraglutide 6 MG/ML Pen Injector [Victoza]                                                                                                      |
| RxNorm     | 1598264     | Saxenda                                                                                                                                         |
| RxNorm     | 1598265     | liraglutide 6 MG/ML [Saxenda]                                                                                                                   |
| RxNorm     | 1598267     | Saxenda Injectable Product                                                                                                                      |
| RxNorm     | 1598268     | 3 ML liraglutide 6 MG/ML Pen Injector [Saxenda]                                                                                                 |
| RxNorm     | 1598269     | liraglutide 6 MG/ML Pen Injector [Saxenda]                                                                                                      |

Continued on next page

**Table1 – continued from previous page**

| CodeSystem | ConceptCode | ConceptName                                                                               |
|------------|-------------|-------------------------------------------------------------------------------------------|
| RxNorm     | 1653594     | liraglutide Pen Injector                                                                  |
| RxNorm     | 1653597     | liraglutide Pen Injector [Victoza]                                                        |
| RxNorm     | 1653600     | liraglutide Pen Injector [Saxenda]                                                        |
| RxNorm     | 1727493     | insulin degludec / liraglutide                                                            |
| RxNorm     | 1860164     | liraglutide 3.6 MG/ML                                                                     |
| RxNorm     | 1860165     | insulin degludec / liraglutide Injectable Product                                         |
| RxNorm     | 1860166     | insulin degludec / liraglutide Pen Injector                                               |
| RxNorm     | 1860167     | 3 ML insulin degludec 100 UNT/ML / liraglutide 3.6 MG/ML Pen Injector                     |
| RxNorm     | 1860168     | Xultophy                                                                                  |
| RxNorm     | 1860169     | insulin degludec 100 UNT/ML / liraglutide 3.6 MG/ML [Xultophy]                            |
| RxNorm     | 1860170     | insulin degludec / liraglutide Pen Injector [Xultophy]                                    |
| RxNorm     | 1860171     | Xultophy Injectable Product                                                               |
| RxNorm     | 1860172     | 3 ML insulin degludec 100 UNT/ML / liraglutide 3.6 MG/ML Pen Injector [Xultophy]          |
| RxNorm     | 1860173     | insulin degludec 100 UNT/ML / liraglutide 3.6 MG/ML Pen Injector                          |
| RxNorm     | 1860174     | insulin degludec 100 UNT/ML / liraglutide 3.6 MG/ML Pen Injector [Xultophy]               |
| NDC        | 54569650700 | 3 ML liraglutide 6 MG/ML Pen Injector [Victoza]                                           |
| NDC        | 001692800   | liraglutide 6mg/mL SUBCUTANEOUS INJECTION, SOLUTION                                       |
| NDC        | 00169280013 | 3 ML liraglutide 6 MG/ML Pen Injector [Saxenda]                                           |
| NDC        | 00169280015 | 3 ML liraglutide 6 MG/ML Pen Injector [Saxenda]                                           |
| NDC        | 00169280090 | 3 ML liraglutide 6 MG/ML Pen Injector [Saxenda]                                           |
| NDC        | 00169280097 | 3 ML liraglutide 6 MG/ML Pen Injector [Saxenda]                                           |
| NDC        | 001692911   | (insulin degludec and liraglutide) 3.6mg/mL / 100[iU]/mL SUBCUTANEOUS INJECTION, SOLUTION |
| NDC        | 00169291115 | 3 ML insulin degludec 100 UNT/ML / liraglutide 3.6 MG/ML Pen Injector [Xultophy]          |
| NDC        | 00169291190 | 3 ML insulin degludec 100 UNT/ML / liraglutide 3.6 MG/ML Pen Injector [Xultophy]          |
| NDC        | 00169291197 | 3 ML insulin degludec 100 UNT/ML / liraglutide 3.6 MG/ML Pen Injector [Xultophy]          |
| NDC        | 001694060   | liraglutide 6mg/mL SUBCUTANEOUS INJECTION                                                 |
| NDC        | 00169406012 | 3 ML liraglutide 6 MG/ML Pen Injector [Victoza]                                           |
| NDC        | 00169406013 | 3 ML liraglutide 6 MG/ML Pen Injector [Victoza]                                           |
| NDC        | 00169406090 | 3 ML liraglutide 6 MG/ML Pen Injector [Victoza]                                           |
| NDC        | 00169406097 | 3 ML liraglutide 6 MG/ML Pen Injector [Victoza]                                           |
| NDC        | 00169406098 | 3 ML liraglutide 6 MG/ML Pen Injector [Victoza]                                           |
| NDC        | 00169406099 | 3 ML liraglutide 6 MG/ML Pen Injector [Victoza]                                           |
| NDC        | 500902853   | liraglutide 6mg/mL SUBCUTANEOUS INJECTION                                                 |

Continued on next page

**Table1 – continued from previous page**

| CodeSystem | ConceptCode | ConceptName                                         |
|------------|-------------|-----------------------------------------------------|
| NDC        | 50090285300 | 3 ML liraglutide 6 MG/ML Pen Injector [Victoza]     |
| NDC        | 500904257   | liraglutide 6mg/mL SUBCUTANEOUS INJECTION, SOLUTION |
| NDC        | 50090425700 | 3 ML liraglutide 6 MG/ML Pen Injector [Saxenda]     |
| NDC        | 500904503   | liraglutide 6mg/mL SUBCUTANEOUS INJECTION           |
| NDC        | 50090450300 | 3 ML liraglutide 6 MG/ML Pen Injector [Victoza]     |
| RxNorm     | 897123      | Victoza                                             |
| RxNorm     | 897125      | liraglutide Prefilled Syringe [Victoza]             |
| RxNorm     | 1186578     | Victoza Injectable Product                          |
| RxNorm     | 1360495     | liraglutide 6 MG/ML Pen Injector [Victoza]          |
| RxNorm     | 1653597     | liraglutide Pen Injector [Victoza]                  |
| RxNorm     | 897124      | liraglutide 6 MG/ML [Victoza]                       |
| RxNorm     | 897126      | 3 ML liraglutide 6 MG/ML Pen Injector [Victoza]     |
| NDC        | 54569650700 | 3 ML liraglutide 6 MG/ML Pen Injector [Victoza]     |
| NDC        | 001694060   | liraglutide 6mg/mL SUBCUTANEOUS INJECTION           |
| NDC        | 00169406012 | 3 ML liraglutide 6 MG/ML Pen Injector [Victoza]     |
| NDC        | 00169406013 | 3 ML liraglutide 6 MG/ML Pen Injector [Victoza]     |
| NDC        | 00169406090 | 3 ML liraglutide 6 MG/ML Pen Injector [Victoza]     |
| NDC        | 00169406097 | 3 ML liraglutide 6 MG/ML Pen Injector [Victoza]     |
| NDC        | 00169406098 | 3 ML liraglutide 6 MG/ML Pen Injector [Victoza]     |
| NDC        | 00169406099 | 3 ML liraglutide 6 MG/ML Pen Injector [Victoza]     |
| NDC        | 500902853   | liraglutide 6mg/mL SUBCUTANEOUS INJECTION           |
| NDC        | 50090285300 | 3 ML liraglutide 6 MG/ML Pen Injector [Victoza]     |
| NDC        | 500904503   | liraglutide 6mg/mL SUBCUTANEOUS INJECTION           |
| NDC        | 50090450300 | 3 ML liraglutide 6 MG/ML Pen Injector [Victoza]     |
| RxNorm     | 1598264     | Saxenda                                             |
| RxNorm     | 1598266     | liraglutide Prefilled Syringe [Saxenda]             |
| RxNorm     | 1598265     | liraglutide 6 MG/ML [Saxenda]                       |
| RxNorm     | 1598267     | Saxenda Injectable Product                          |
| RxNorm     | 1598268     | 3 ML liraglutide 6 MG/ML Pen Injector [Saxenda]     |
| RxNorm     | 1598269     | liraglutide 6 MG/ML Pen Injector [Saxenda]          |
| RxNorm     | 1653600     | liraglutide Pen Injector [Saxenda]                  |
| NDC        | 001692800   | liraglutide 6mg/mL SUBCUTANEOUS INJECTION, SOLUTION |
| NDC        | 00169280013 | 3 ML liraglutide 6 MG/ML Pen Injector [Saxenda]     |
| NDC        | 00169280015 | 3 ML liraglutide 6 MG/ML Pen Injector [Saxenda]     |
| NDC        | 00169280090 | 3 ML liraglutide 6 MG/ML Pen Injector [Saxenda]     |
| NDC        | 00169280097 | 3 ML liraglutide 6 MG/ML Pen Injector [Saxenda]     |
| NDC        | 500904257   | liraglutide 6mg/mL SUBCUTANEOUS INJECTION, SOLUTION |
| NDC        | 50090425700 | 3 ML liraglutide 6 MG/ML Pen Injector [Saxenda]     |
| RxNorm     | 60548       | exenatide                                           |
| RxNorm     | 1242962     | exenatide Injectable Suspension                     |

Continued on next page

**Table1 – continued from previous page**

| CodeSystem | ConceptCode | ConceptName                                           |
|------------|-------------|-------------------------------------------------------|
| RxNorm     | 1544917     | exenatide Prefilled Syringe [Bydureon]                |
| RxNorm     | 604750      | exenatide 0.250 MG/ML Injectable Solution             |
| RxNorm     | 604749      | exenatide Injectable Solution                         |
| RxNorm     | 604752      | exenatide 0.250 MG/ML [Byetta]                        |
| RxNorm     | 604748      | exenatide 0.250 MG/ML                                 |
| RxNorm     | 604753      | exenatide Injectable Solution [Byetta]                |
| RxNorm     | 604754      | exenatide 0.250 MG/ML Injectable Solution [Byetta]    |
| RxNorm     | 847909      | exenatide Prefilled Syringe                           |
| RxNorm     | 847912      | exenatide Prefilled Syringe [Byetta]                  |
| RxNorm     | 1163790     | exenatide Injectable Product                          |
| RxNorm     | 1169415     | Byetta Injectable Product                             |
| RxNorm     | 1242961     | exenatide 3.08 MG/ML                                  |
| RxNorm     | 1242963     | exenatide 2 MG Injection                              |
| RxNorm     | 1242964     | Bydureon                                              |
| RxNorm     | 1242965     | exenatide 3.08 MG/ML [Bydureon]                       |
| RxNorm     | 1242967     | Bydureon Injectable Product                           |
| RxNorm     | 1242968     | exenatide 2 MG Injection [Bydureon]                   |
| RxNorm     | 1359802     | exenatide 0.005 MG/ACTUAT Pen Injector [Byetta]       |
| RxNorm     | 1359979     | exenatide 0.01 MG/ACTUAT Pen Injector [Byetta]        |
| RxNorm     | 1360454     | exenatide 0.01 MG/ACTUAT Pen Injector                 |
| RxNorm     | 1359640     | exenatide 0.005 MG/ACTUAT Pen Injector                |
| RxNorm     | 1544919     | exenatide 3.08 MG/ML Pen Injector                     |
| RxNorm     | 1544920     | exenatide 3.08 MG/ML Pen Injector [Bydureon]          |
| RxNorm     | 1544916     | 0.65 ML exenatide 3.08 MG/ML Pen Injector             |
| RxNorm     | 1544918     | 0.65 ML exenatide 3.08 MG/ML Pen Injector [Bydureon]  |
| RxNorm     | 1653610     | exenatide 2 MG                                        |
| RxNorm     | 1653611     | exenatide Injection                                   |
| RxNorm     | 1653613     | exenatide 2 MG [Bydureon]                             |
| RxNorm     | 1653614     | exenatide Injection [Bydureon]                        |
| RxNorm     | 1653616     | exenatide Pen Injector                                |
| RxNorm     | 1653619     | exenatide Pen Injector [Bydureon]                     |
| RxNorm     | 1653625     | exenatide Pen Injector [Byetta]                       |
| RxNorm     | 1990864     | exenatide 2.35 MG/ML                                  |
| RxNorm     | 1990865     | exenatide Auto-Injector                               |
| RxNorm     | 1990866     | 0.85 ML exenatide 2.35 MG/ML Auto-Injector            |
| RxNorm     | 1990867     | exenatide 2.35 MG/ML [Bydureon]                       |
| RxNorm     | 1990868     | exenatide Auto-Injector [Bydureon]                    |
| RxNorm     | 1990869     | 0.85 ML exenatide 2.35 MG/ML Auto-Injector [Bydureon] |
| RxNorm     | 1990870     | exenatide 2.35 MG/ML Auto-Injector                    |
| RxNorm     | 1990871     | exenatide 2.35 MG/ML Auto-Injector [Bydureon]         |
| RxNorm     | 847908      | exenatide 0.01 MG/ACTUAT                              |
| RxNorm     | 847910      | 60 ACTUAT exenatide 0.01 MG/ACTUAT Pen Injector       |
| RxNorm     | 847911      | exenatide 0.01 MG/ACTUAT [Byetta]                     |

Continued on next page

**Table1 – continued from previous page**

| CodeSystem | ConceptCode | ConceptName                                                               |
|------------|-------------|---------------------------------------------------------------------------|
| RxNorm     | 847913      | 60 ACTUAT exenatide 0.01 MG/ACTUAT Pen Injector [Byetta]                  |
| RxNorm     | 847914      | exenatide 0.005 MG/ACTUAT                                                 |
| RxNorm     | 847915      | 60 ACTUAT exenatide 0.005 MG/ACTUAT Pen Injector                          |
| RxNorm     | 847916      | exenatide 0.005 MG/ACTUAT [Byetta]                                        |
| RxNorm     | 847917      | 60 ACTUAT exenatide 0.005 MG/ACTUAT Pen Injector [Byetta]                 |
| RxNorm     | 744863      | exenatide 0.25 MG/ML Injectable Solution                                  |
| RxNorm     | 744862      | exenatide 0.25 MG/ML                                                      |
| RxNorm     | 744864      | exenatide 0.25 MG/ML [Byetta]                                             |
| RxNorm     | 744865      | exenatide 0.25 MG/ML Injectable Solution [Byetta]                         |
| RxNorm     | 1242966     | exenatide Injectable Suspension [Bydureon]                                |
| RxNorm     | 604751      | Byetta                                                                    |
| SNOMED CT  | 416525003   | Exenatide 250mcg/mL injection solution pre-filled pen                     |
| SNOMED CT  | 416859008   | Exenatide                                                                 |
| SNOMED CT  | 417734003   | Exenatide-containing product                                              |
| SNOMED CT  | 438958002   | Exenatide 250micrograms/mL injection solution 2.4mL pre-filled pen        |
| SNOMED CT  | 440246006   | Exenatide 250micrograms/mL injection solution 1.2mL pre-filled pen        |
| SNOMED CT  | 775913009   | Exenatide only product                                                    |
| SNOMED CT  | 1155637009  | Exenatide 250 microgram/mL solution for injection                         |
| SNOMED CT  | 1155638004  | Exenatide-containing product in parenteral dose form                      |
| SNOMED CT  | 1155639007  | Exenatide only product in parenteral dose form                            |
| SNOMED CT  | 1237218000  | Exenatide 2 mg powder for prolonged-release suspension for injection vial |
| NDC        | 003106512   | exenatide 250ug/mL SUBCUTANEOUS INJECTION                                 |
| NDC        | 00310651201 | 60 ACTUAT exenatide 0.005 MG/ACTUAT Pen Injector [Byetta]                 |
| NDC        | 00310651285 | 60 ACTUAT exenatide 0.005 MG/ACTUAT Pen Injector [Byetta]                 |
| NDC        | 003106520   | exenatide KIT                                                             |
| NDC        | 00310652004 | exenatide 2 MG Injection [Bydureon]                                       |
| NDC        | 003106524   | exenatide 250ug/mL SUBCUTANEOUS INJECTION                                 |
| NDC        | 00310652401 | 60 ACTUAT exenatide 0.01 MG/ACTUAT Pen Injector [Byetta]                  |
| NDC        | 003106530   | exenatide 2mg/.65mL SUBCUTANEOUS INJECTION, SUSPENSION, EXTENDED RELEASE  |
| NDC        | 00310653001 | 0.65 ML exenatide 3.08 MG/ML Pen Injector [Bydureon]                      |
| NDC        | 00310653004 | 0.65 ML exenatide 3.08 MG/ML Pen Injector [Bydureon]                      |
| NDC        | 00310653085 | 0.65 ML exenatide 3.08 MG/ML Pen Injector [Bydureon]                      |
| NDC        | 003106540   | exenatide 2mg/.85mL SUBCUTANEOUS INJECTION, SUSPENSION, EXTENDED RELEASE  |

Continued on next page

**Table1 – continued from previous page**

| CodeSystem | ConceptCode | ConceptName                                                    |
|------------|-------------|----------------------------------------------------------------|
| NDC        | 00310654001 | 0.85 ML exenatide 2.35 MG/ML Auto-Injector [Bydureon]          |
| NDC        | 00310654004 | 0.85 ML exenatide 2.35 MG/ML Auto-Injector [Bydureon]          |
| NDC        | 00310654085 | 0.85 ML exenatide 2.35 MG/ML Auto-Injector [Bydureon]          |
| NDC        | 548685384   | exenatide 250ug/mL SUBCUTANEOUS INJECTION                      |
| NDC        | 54868538400 | 60 ACTUAT exenatide 0.005 MG/ACTUAT Pen Injector [Byetta]      |
| NDC        | 54868538401 | 60 ACTUAT exenatide 0.01 MG/ACTUAT Pen Injector [Byetta]       |
| NDC        | 54868538402 | 60 ACTUAT exenatide 0.005 MG/ACTUAT Prefilled Syringe [Byetta] |
| NDC        | 68258894701 | 60 ACTUAT exenatide 0.005 MG/ACTUAT Prefilled Syringe [Byetta] |
| NDC        | 68258894802 | 60 ACTUAT exenatide 0.01 MG/ACTUAT Prefilled Syringe [Byetta]  |
| NDC        | 00002021007 | 60 ACTUAT exenatide 0.005 MG/ACTUAT Prefilled Syringe [Byetta] |
| NDC        | 00002021008 | 60 ACTUAT exenatide 0.01 MG/ACTUAT Prefilled Syringe [Byetta]  |
| NDC        | 00002021009 | 60 ACTUAT exenatide 0.005 MG/ACTUAT Prefilled Syringe [Byetta] |
| NDC        | 66029021007 | 60 ACTUAT exenatide 0.005 MG/ACTUAT Prefilled Syringe [Byetta] |
| NDC        | 66029021008 | 60 ACTUAT exenatide 0.01 MG/ACTUAT Prefilled Syringe [Byetta]  |
| NDC        | 667800210   | exenatide 250ug/mL SUBCUTANEOUS INJECTION [byetta]             |
| NDC        | 66780021007 | 60 ACTUAT exenatide 0.005 MG/ACTUAT Pen Injector [Byetta]      |
| NDC        | 66780021008 | 60 ACTUAT exenatide 0.01 MG/ACTUAT Prefilled Syringe [Byetta]  |
| NDC        | 66780021009 | 60 ACTUAT exenatide 0.005 MG/ACTUAT Pen Injector [Byetta]      |
| NDC        | 667800212   | exenatide 250ug/mL SUBCUTANEOUS INJECTION [byetta]             |
| NDC        | 66780021201 | 60 ACTUAT exenatide 0.01 MG/ACTUAT Pen Injector [Byetta]       |
| NDC        | 667800219   | exenatide KIT [bydureon]                                       |
| NDC        | 66780021902 | exenatide 2 MG Injection [Bydureon]                            |
| NDC        | 66780021904 | exenatide 2 MG Injection [Bydureon]                            |
| NDC        | 667800226   | exenatide KIT [bydureon]                                       |
| NDC        | 66780022601 | exenatide 2 MG Injection [Bydureon]                            |
| NDC        | 66914103504 | 60 ACTUAT exenatide 0.005 MG/ACTUAT Prefilled Syringe [Byetta] |

Continued on next page

**Table1 – continued from previous page**

| CodeSystem | ConceptCode | ConceptName                                                              |
|------------|-------------|--------------------------------------------------------------------------|
| NDC        | 66914103505 | 60 ACTUAT exenatide 0.01 MG/ACTUAT Prefilled Syringe [Byetta]            |
| RxNorm     | 1242964     | Bydureon                                                                 |
| RxNorm     | 1544917     | exenatide Prefilled Syringe [Bydureon]                                   |
| RxNorm     | 1242965     | exenatide 3.08 MG/ML [Bydureon]                                          |
| RxNorm     | 1242967     | Bydureon Injectable Product                                              |
| RxNorm     | 1242968     | exenatide 2 MG Injection [Bydureon]                                      |
| RxNorm     | 1544920     | exenatide 3.08 MG/ML Pen Injector [Bydureon]                             |
| RxNorm     | 1544918     | 0.65 ML exenatide 3.08 MG/ML Pen Injector [Bydureon]                     |
| RxNorm     | 1653613     | exenatide 2 MG [Bydureon]                                                |
| RxNorm     | 1653614     | exenatide Injection [Bydureon]                                           |
| RxNorm     | 1653619     | exenatide Pen Injector [Bydureon]                                        |
| RxNorm     | 1990867     | exenatide 2.35 MG/ML [Bydureon]                                          |
| RxNorm     | 1990868     | exenatide Auto-Injector [Bydureon]                                       |
| RxNorm     | 1990869     | 0.85 ML exenatide 2.35 MG/ML Auto-Injector [Bydureon]                    |
| RxNorm     | 1990871     | exenatide 2.35 MG/ML Auto-Injector [Bydureon]                            |
| RxNorm     | 1242966     | exenatide Injectable Suspension [Bydureon]                               |
| NDC        | 003106520   | exenatide KIT                                                            |
| NDC        | 00310652004 | exenatide 2 MG Injection [Bydureon]                                      |
| NDC        | 003106530   | exenatide 2mg/.65mL SUBCUTANEOUS INJECTION, SUSPENSION, EXTENDED RELEASE |
| NDC        | 00310653001 | 0.65 ML exenatide 3.08 MG/ML Pen Injector [Bydureon]                     |
| NDC        | 00310653004 | 0.65 ML exenatide 3.08 MG/ML Pen Injector [Bydureon]                     |
| NDC        | 00310653085 | 0.65 ML exenatide 3.08 MG/ML Pen Injector [Bydureon]                     |
| NDC        | 003106540   | exenatide 2mg/.85mL SUBCUTANEOUS INJECTION, SUSPENSION, EXTENDED RELEASE |
| NDC        | 00310654001 | 0.85 ML exenatide 2.35 MG/ML Auto-Injector [Bydureon]                    |
| NDC        | 00310654004 | 0.85 ML exenatide 2.35 MG/ML Auto-Injector [Bydureon]                    |
| NDC        | 00310654085 | 0.85 ML exenatide 2.35 MG/ML Auto-Injector [Bydureon]                    |
| NDC        | 667800219   | exenatide KIT [bydureon]                                                 |
| NDC        | 66780021902 | exenatide 2 MG Injection [Bydureon]                                      |
| NDC        | 66780021904 | exenatide 2 MG Injection [Bydureon]                                      |
| NDC        | 667800226   | exenatide KIT [bydureon]                                                 |
| NDC        | 66780022601 | exenatide 2 MG Injection [Bydureon]                                      |
| RxNorm     | 604751      | Byetta                                                                   |
| RxNorm     | 604753      | exenatide Injectable Solution [Byetta]                                   |
| RxNorm     | 604754      | exenatide 0.250 MG/ML Injectable Solution [Byetta]                       |
| RxNorm     | 847912      | exenatide Prefilled Syringe [Byetta]                                     |
| RxNorm     | 1169415     | Byetta Injectable Product                                                |
| RxNorm     | 1359802     | exenatide 0.005 MG/ACTUAT Pen Injector [Byetta]                          |
| RxNorm     | 1359979     | exenatide 0.01 MG/ACTUAT Pen Injector [Byetta]                           |
| RxNorm     | 1653625     | exenatide Pen Injector [Byetta]                                          |
| RxNorm     | 847911      | exenatide 0.01 MG/ACTUAT [Byetta]                                        |

Continued on next page

**Table1 – continued from previous page**

| CodeSystem | ConceptCode | ConceptName                                                    |
|------------|-------------|----------------------------------------------------------------|
| RxNorm     | 847913      | 60 ACTUAT exenatide 0.01 MG/ACTUAT Pen Injector [Byetta]       |
| RxNorm     | 847916      | exenatide 0.005 MG/ACTUAT [Byetta]                             |
| RxNorm     | 847917      | 60 ACTUAT exenatide 0.005 MG/ACTUAT Pen Injector [Byetta]      |
| RxNorm     | 744864      | exenatide 0.25 MG/ML [Byetta]                                  |
| RxNorm     | 744865      | exenatide 0.25 MG/ML Injectable Solution [Byetta]              |
| NDC        | 003106512   | exenatide 250ug/mL SUBCUTANEOUS INJECTION                      |
| NDC        | 00310651201 | 60 ACTUAT exenatide 0.005 MG/ACTUAT Pen Injector [Byetta]      |
| NDC        | 00310651285 | 60 ACTUAT exenatide 0.005 MG/ACTUAT Pen Injector [Byetta]      |
| NDC        | 003106524   | exenatide 250ug/mL SUBCUTANEOUS INJECTION                      |
| NDC        | 00310652401 | 60 ACTUAT exenatide 0.01 MG/ACTUAT Pen Injector [Byetta]       |
| NDC        | 548685384   | exenatide 250ug/mL SUBCUTANEOUS INJECTION                      |
| NDC        | 54868538400 | 60 ACTUAT exenatide 0.005 MG/ACTUAT Pen Injector [Byetta]      |
| NDC        | 54868538401 | 60 ACTUAT exenatide 0.01 MG/ACTUAT Pen Injector [Byetta]       |
| NDC        | 54868538402 | 60 ACTUAT exenatide 0.005 MG/ACTUAT Prefilled Syringe [Byetta] |
| NDC        | 68258894701 | 60 ACTUAT exenatide 0.005 MG/ACTUAT Prefilled Syringe [Byetta] |
| NDC        | 68258894802 | 60 ACTUAT exenatide 0.01 MG/ACTUAT Prefilled Syringe [Byetta]  |
| NDC        | 00002021007 | 60 ACTUAT exenatide 0.005 MG/ACTUAT Prefilled Syringe [Byetta] |
| NDC        | 00002021008 | 60 ACTUAT exenatide 0.01 MG/ACTUAT Prefilled Syringe [Byetta]  |
| NDC        | 00002021009 | 60 ACTUAT exenatide 0.005 MG/ACTUAT Prefilled Syringe [Byetta] |
| NDC        | 66029021007 | 60 ACTUAT exenatide 0.005 MG/ACTUAT Prefilled Syringe [Byetta] |
| NDC        | 66029021008 | 60 ACTUAT exenatide 0.01 MG/ACTUAT Prefilled Syringe [Byetta]  |
| NDC        | 667800210   | exenatide 250ug/mL SUBCUTANEOUS INJECTION [byetta]             |
| NDC        | 66780021007 | 60 ACTUAT exenatide 0.005 MG/ACTUAT Pen Injector [Byetta]      |
| NDC        | 66780021008 | 60 ACTUAT exenatide 0.01 MG/ACTUAT Prefilled Syringe [Byetta]  |

Continued on next page



**Table1 – continued from previous page**

| CodeSystem | ConceptCode | ConceptName                                                    |
|------------|-------------|----------------------------------------------------------------|
| NDC        | 66780021009 | 60 ACTUAT exenatide 0.005 MG/ACTUAT Pen Injector [Byetta]      |
| NDC        | 667800212   | exenatide 250ug/mL SUBCUTANEOUS INJECTION [byetta]             |
| NDC        | 66780021201 | 60 ACTUAT exenatide 0.01 MG/ACTUAT Pen Injector [Byetta]       |
| NDC        | 66914103504 | 60 ACTUAT exenatide 0.005 MG/ACTUAT Prefilled Syringe [Byetta] |
| NDC        | 66914103505 | 60 ACTUAT exenatide 0.01 MG/ACTUAT Prefilled Syringe [Byetta]  |

## 1.2 Obesity

Table 2: Concept codes used to identify obesity conditions.

| CodeSystem | ConceptCode    | ConceptName                                           |
|------------|----------------|-------------------------------------------------------|
| ICD10CM    | E66.01         | Morbid (severe) obesity due to excess calories        |
| ICD10CM    | E66.09         | Other obesity due to excess calories                  |
| ICD10CM    | E66.1          | Drug-induced obesity                                  |
| ICD10CM    | E66.2          | Morbid (severe) obesity with alveolar hypoventilation |
| ICD10CM    | E66.3          | Overweight                                            |
| ICD10CM    | E66.8          | Other obesity                                         |
| ICD10CM    | E66.9          | Obesity, unspecified                                  |
| ICD10CM    | Z68.30         | Body mass index (BMI) 30.0-30.9, adult                |
| ICD10CM    | Z68.31         | Body mass index (BMI) 31.0-31.9, adult                |
| ICD10CM    | Z68.32         | Body mass index (BMI) 32.0-32.9, adult                |
| ICD10CM    | Z68.33         | Body mass index (BMI) 33.0-33.9, adult                |
| ICD10CM    | Z68.34         | Body mass index (BMI) 34.0-34.9, adult                |
| ICD10CM    | Z68.35         | Body mass index (BMI) 35.0-35.9, adult                |
| ICD10CM    | Z68.36         | Body mass index (BMI) 36.0-36.9, adult                |
| ICD10CM    | Z68.37         | Body mass index (BMI) 37.0-37.9, adult                |
| ICD10CM    | Z68.38         | Body mass index (BMI) 38.0-38.9, adult                |
| ICD10CM    | Z68.39         | Body mass index (BMI) 39.0-39.9, adult                |
| ICD10CM    | Z68.41         | Body mass index (BMI) 40.0-44.9, adult                |
| ICD10CM    | Z68.42         | Body mass index (BMI) 45.0-49.9, adult                |
| ICD10CM    | Z68.43         | Body mass index (BMI) 50.0-59.9, adult                |
| ICD10CM    | Z68.44         | Body mass index (BMI) 60.0-69.9, adult                |
| ICD10CM    | Z68.45         | Body mass index (BMI) 70 or greater, adult            |
| SNOMED CT  | 83911000119104 | Severe obesity                                        |
| SNOMED CT  | 190965006      | Drug-induced obesity                                  |
| SNOMED CT  | 190966007      | Extreme obesity with alveolar hypoventilation         |

Continued on next page

**Table2 – continued from previous page**

| CodeSystem | ConceptCode       | ConceptName                                                                                                |
|------------|-------------------|------------------------------------------------------------------------------------------------------------|
| SNOMED CT  | 162864005         | Body mass index 30+ - obesity                                                                              |
| SNOMED CT  | 238131007         | Overweight                                                                                                 |
| SNOMED CT  | 238136002         | Morbid obesity                                                                                             |
| SNOMED CT  | 408512008         | Body mass index 40+ - severely obese                                                                       |
| SNOMED CT  | 414915002         | Obese                                                                                                      |
| SNOMED CT  | 414916001         | Obesity                                                                                                    |
| SNOMED CT  | 415530009         | Simple obesity                                                                                             |
| SNOMED CT  | 1187531009        | Obesity due to pituitary disease                                                                           |
| SNOMED CT  | 5036006           | Hypogonadal obesity                                                                                        |
| SNOMED CT  | 1229946007        | MAGEL2-related Prader-Willi-like syndrome                                                                  |
| SNOMED CT  | 1208987006        | PHIP-related behavioral problems, intellectual disability, obesity, dysmorphic features syndrome           |
| SNOMED CT  | 1229943004        | SIM1-related Prader-Willi-like syndrome                                                                    |
| SNOMED CT  | 763350002         | Intellectual disability, obesity, brain malformation, facial dysmorphism syndrome                          |
| SNOMED CT  | 770680004         | Prader-Willi-like syndrome                                                                                 |
| SNOMED CT  | 770750002         | Intellectual disability, seizures, macrocephaly, obesity syndrome                                          |
| SNOMED CT  | 773663004         | Rapid-onset childhood obesity, hypothalamic dysfunction, hypoventilation, autonomic dysregulation syndrome |
| SNOMED CT  | 774102003         | Intellectual disability, obesity, prognathism, eye and skin anomalies syndrome                             |
| SNOMED CT  | 776204008         | Colobomatous microphthalmia, obesity, hypogonadism, intellectual disability syndrome                       |
| SNOMED CT  | 783549006         | Obesity due to CEP19 deficiency                                                                            |
| SNOMED CT  | 783556000         | Severe early-onset obesity insulin resistance syndrome due to SH2B1 deficiency                             |
| SNOMED CT  | 783719006         | Obesity due to SIM1 deficiency                                                                             |
| SNOMED CT  | 785722006         | Obesity due to leptin receptor gene deficiency                                                             |
| SNOMED CT  | 788996008         | Obesity in adolescence                                                                                     |
| SNOMED CT  | 819948005         | Obese class III                                                                                            |
| SNOMED CT  | 171000119107      | Maternal obesity complicating pregnancy, childbirth and the puerperium, antepartum                         |
| SNOMED CT  | 443371000124107   | Obese class I                                                                                              |
| SNOMED CT  | 443381000124105   | Obese class II                                                                                             |
| SNOMED CT  | 461341000124106   | Lower body obesity                                                                                         |
| SNOMED CT  | 1076701000119104  | Hypertrophy of fat pad of right knee                                                                       |
| SNOMED CT  | 1076711000119101  | Hypertrophy of fat pad of left knee                                                                        |
| SNOMED CT  | 10750551000119100 | Obesity in mother complicating childbirth                                                                  |
| SNOMED CT  | 15750121000119108 | Severe obesity complicating pregnancy                                                                      |
| SNOMED CT  | 722037004         | Intellectual disability, epileptic seizures, hypogonadism and hypogonadism, microcephaly, obesity syndrome |
| SNOMED CT  | 162690006         | O/E - obese                                                                                                |

Continued on next page

**Table2 – continued from previous page**

| CodeSystem | ConceptCode | ConceptName                                                                         |
|------------|-------------|-------------------------------------------------------------------------------------|
| SNOMED CT  | 162863004   | Body mass index 25-29 - overweight                                                  |
| SNOMED CT  | 238132000   | Android obesity                                                                     |
| SNOMED CT  | 238133005   | Gynecoid obesity                                                                    |
| SNOMED CT  | 238134004   | Generalized obesity                                                                 |
| SNOMED CT  | 238135003   | Fat pad syndrome                                                                    |
| SNOMED CT  | 248311001   | Central obesity                                                                     |
| SNOMED CT  | 248312008   | Peripheral obesity                                                                  |
| SNOMED CT  | 360566006   | Buffalo obesity                                                                     |
| SNOMED CT  | 414438005   | Hyperplastic obesity                                                                |
| SNOMED CT  | 414917005   | Obesity by adipocyte growth pattern                                                 |
| SNOMED CT  | 414918000   | Obesity by age of onset                                                             |
| SNOMED CT  | 414919008   | Obesity by contributing factors                                                     |
| SNOMED CT  | 414920002   | Obesity by fat distribution pattern                                                 |
| SNOMED CT  | 44772007    | Maternal obesity syndrome                                                           |
| SNOMED CT  | 53146006    | Hypothyroid obesity                                                                 |
| SNOMED CT  | 57337005    | Steatopygia                                                                         |
| SNOMED CT  | 62999006    | Adiposogenital dystrophy                                                            |
| SNOMED CT  | 63702009    | Alstrom syndrome                                                                    |
| SNOMED CT  | 72894001    | Hypertrophy of fat pad of knee                                                      |
| SNOMED CT  | 80660001    | Mauriac's syndrome                                                                  |
| SNOMED CT  | 444862003   | Childhood obesity                                                                   |
| SNOMED CT  | 450451007   | Overweight in childhood                                                             |
| SNOMED CT  | 700150001   | Congenital leptin deficiency                                                        |
| SNOMED CT  | 702949005   | Proopiomelanocortin deficiency syndrome                                             |
| SNOMED CT  | 715628009   | MORM syndrome                                                                       |
| SNOMED CT  | 717269008   | Obesity due to melanocortin 4 receptor deficiency                                   |
| SNOMED CT  | 717761005   | Choroideremia with deafness and obesity syndrome                                    |
| SNOMED CT  | 719160009   | Syndromic X-linked intellectual disability type 7                                   |
| SNOMED CT  | 719834005   | Wilson Turner syndrome                                                              |
| SNOMED CT  | 721231007   | Hydrocephalus with obesity and hypogonadism syndrome                                |
| SNOMED CT  | 722051004   | Obesity, colitis, hypothyroidism, cardiac hypertrophy, developmental delay syndrome |
| SNOMED CT  | 722053001   | Obesity due to prohormone convertase I deficiency                                   |
| SNOMED CT  | 722595002   | Overweight in adulthood with body mass index of 25 or more but less than 30         |
| SNOMED CT  | 722596001   | Obesity caused by energy imbalance                                                  |
| SNOMED CT  | 724137002   | MOMO syndrome                                                                       |
| SNOMED CT  | 268915006   | O/E - weight 10-20% over ideal                                                      |
| SNOMED CT  | 268916007   | O/E - weight greater than 20% over ideal                                            |
| SNOMED CT  | 270486005   | Localized adiposity                                                                 |
| SNOMED CT  | 275947003   | O/E - overweight                                                                    |
| SNOMED CT  | 290439001   | Familial obesity                                                                    |
| SNOMED CT  | 292464007   | Constitutional obesity                                                              |

Continued on next page

**Table2 – continued from previous page**

| CodeSystem | ConceptCode | ConceptName                                                              |
|------------|-------------|--------------------------------------------------------------------------|
| SNOMED CT  | 293481008   | Hyperplastic-hypertrophic obesity                                        |
| SNOMED CT  | 294493008   | Lifelong obesity                                                         |
| SNOMED CT  | 295509007   | Hypertrophic obesity                                                     |
| SNOMED CT  | 296526005   | Adult-onset obesity                                                      |
| SNOMED CT  | 297500005   | Endogenous obesity                                                       |
| SNOMED CT  | 298464002   | Obesity of endocrine origin                                              |
| SNOMED CT  | 1003380001  | 6q16 microdeletion syndrome                                              |
| SNOMED CT  | 1255335006  | X-linked intellectual disability, short stature, overweight syndrome     |
| SNOMED CT  | 82793005    | Hypothalamic obesity                                                     |
| SNOMED CT  | 111036000   | Hyperinsular obesity                                                     |
| SNOMED CT  | 1260134001  | Spastic paraplegia, intellectual disability, nystagmus, obesity syndrome |
| SNOMED CT  | 1260139006  | Genetic non-syndromic obesity                                            |

### 1.3 Overweight

Table 3: Concept codes used to identify overweight conditions.

| CodeSystem | ConceptCode | ConceptName                                                                 |
|------------|-------------|-----------------------------------------------------------------------------|
| ICD10CM    | E66.3       | Overweight                                                                  |
| ICD10CM    | Z68.27      | Body mass index (BMI) 27.0-27.9, adult                                      |
| ICD10CM    | Z68.28      | Body mass index (BMI) 28.0-28.9, adult                                      |
| ICD10CM    | Z68.29      | Body mass index (BMI) 29.0-29.9, adult                                      |
| SNOMED CT  | 238131007   | Overweight                                                                  |
| SNOMED CT  | 162863004   | Body mass index 25-29 - overweight                                          |
| SNOMED CT  | 722595002   | Overweight in adulthood with body mass index of 25 or more but less than 30 |
| SNOMED CT  | 450451007   | Overweight in childhood                                                     |
| SNOMED CT  | 268915006   | O/E - weight 10-20% over ideal                                              |
| SNOMED CT  | 268916007   | O/E - weight greater than 20% over ideal                                    |
| SNOMED CT  | 275947003   | O/E - overweight                                                            |

### 1.4 Comorbidities

#### 1.4.1 Asthma

Table 4: Concept codes used to identify asthma conditions.

| CodeSystem | ConceptCode       | ConceptName                                                                               |
|------------|-------------------|-------------------------------------------------------------------------------------------|
| ICD10CM    | J45               | Asthma                                                                                    |
| ICD10CM    | J45.2             | Mild intermittent asthma                                                                  |
| ICD10CM    | J45.20            | Mild intermittent asthma, uncomplicated                                                   |
| ICD10CM    | J45.21            | Mild intermittent asthma with (acute) exacerbation                                        |
| ICD10CM    | J45.22            | Mild intermittent asthma with status asthmaticus                                          |
| ICD10CM    | J45.3             | Mild persistent asthma                                                                    |
| ICD10CM    | J45.30            | Mild persistent asthma, uncomplicated                                                     |
| ICD10CM    | J45.31            | Mild persistent asthma with (acute) exacerbation                                          |
| ICD10CM    | J45.32            | Mild persistent asthma with status asthmaticus                                            |
| ICD10CM    | J45.4             | Moderate persistent asthma                                                                |
| ICD10CM    | J45.40            | Moderate persistent asthma, uncomplicated                                                 |
| ICD10CM    | J45.41            | Moderate persistent asthma with (acute) exacerbation                                      |
| ICD10CM    | J45.42            | Moderate persistent asthma with status asthmaticus                                        |
| ICD10CM    | J45.5             | Severe persistent asthma                                                                  |
| ICD10CM    | J45.50            | Severe persistent asthma, uncomplicated                                                   |
| ICD10CM    | J45.51            | Severe persistent asthma with (acute) exacerbation                                        |
| ICD10CM    | J45.52            | Severe persistent asthma with status asthmaticus                                          |
| ICD10CM    | J45.9             | Other and unspecified asthma                                                              |
| ICD10CM    | J45.90            | Unspecified asthma                                                                        |
| ICD10CM    | J45.901           | Unspecified asthma with (acute) exacerbation                                              |
| ICD10CM    | J45.902           | Unspecified asthma with status asthmaticus                                                |
| ICD10CM    | J45.909           | Unspecified asthma, uncomplicated                                                         |
| ICD10CM    | J45.99            | Other asthma                                                                              |
| ICD10CM    | J45.990           | Exercise induced bronchospasm                                                             |
| ICD10CM    | J45.991           | Cough variant asthma                                                                      |
| ICD10CM    | J45.998           | Other asthma                                                                              |
| SNOMED CT  | 1751000119100     | Acute exacerbation of chronic obstructive airways disease with asthma                     |
| SNOMED CT  | 99031000119107    | Acute exacerbation of asthma co-occurrent with allergic rhinitis                          |
| SNOMED CT  | 124991000119109   | Severe persistent asthma co-occurrent with allergic rhinitis                              |
| SNOMED CT  | 125001000119103   | Moderate persistent asthma co-occurrent with allergic rhinitis                            |
| SNOMED CT  | 10674711000119105 | Acute severe exacerbation of asthma co-occurrent with allergic rhinitis                   |
| SNOMED CT  | 10675431000119106 | Severe persistent allergic asthma                                                         |
| SNOMED CT  | 10675471000119109 | Acute severe exacerbation of severe persistent allergic asthma                            |
| SNOMED CT  | 10675551000119104 | Acute severe exacerbation of severe persistent asthma co-occurrent with allergic rhinitis |
| SNOMED CT  | 10675911000119109 | Acute severe exacerbation of mild persistent allergic asthma                              |

Continued on next page

**Table4 – continued from previous page**

| CodeSystem | ConceptCode       | ConceptName                                                                                      |
|------------|-------------------|--------------------------------------------------------------------------------------------------|
| SNOMED CT  | 10675991000119100 | Acute severe exacerbation of mild persistent allergic asthma co-occurrent with allergic rhinitis |
| SNOMED CT  | 10676391000119108 | Moderate persistent allergic asthma                                                              |
| SNOMED CT  | 10676431000119103 | Acute severe exacerbation of moderate persistent allergic asthma                                 |
| SNOMED CT  | 10676511000119109 | Acute severe exacerbation of moderate persistent asthma co-occurrent with allergic rhinitis      |
| SNOMED CT  | 10692721000119102 | Chronic obstructive asthma co-occurrent with acute exacerbation of asthma                        |
| SNOMED CT  | 370219009         | Moderate asthma                                                                                  |
| SNOMED CT  | 370221004         | Severe asthma                                                                                    |
| SNOMED CT  | 426656000         | Severe persistent asthma                                                                         |
| SNOMED CT  | 427295004         | Moderate persistent asthma                                                                       |
| SNOMED CT  | 442025000         | Acute exacerbation of chronic asthmatic bronchitis                                               |
| SNOMED CT  | 707446004         | Exacerbation of moderate persistent asthma                                                       |
| SNOMED CT  | 707447008         | Exacerbation of severe persistent asthma                                                         |
| SNOMED CT  | 707512002         | Uncomplicated moderate persistent asthma                                                         |
| SNOMED CT  | 707513007         | Uncomplicated severe persistent asthma                                                           |
| SNOMED CT  | 707979007         | Acute severe exacerbation of severe persistent asthma                                            |
| SNOMED CT  | 707980005         | Acute severe exacerbation of moderate persistent asthma                                          |
| SNOMED CT  | 707981009         | Acute severe exacerbation of mild persistent asthma                                              |
| SNOMED CT  | 708090002         | Acute severe exacerbation of asthma                                                              |
| SNOMED CT  | 708093000         | Acute exacerbation of allergic asthma                                                            |
| SNOMED CT  | 708094006         | Acute exacerbation of intrinsic asthma                                                           |
| SNOMED CT  | 708095007         | Acute severe exacerbation of immunoglobulin E-mediated allergic asthma                           |
| SNOMED CT  | 708096008         | Acute severe exacerbation of intrinsic asthma                                                    |
| SNOMED CT  | 733858005         | Acute severe refractory exacerbation of asthma                                                   |
| SNOMED CT  | 734904007         | Life threatening acute exacerbation of asthma                                                    |
| SNOMED CT  | 782513000         | Acute severe exacerbation of allergic asthma                                                     |
| SNOMED CT  | 786836003         | Near fatal asthma                                                                                |
| SNOMED CT  | 829976001         | Thunderstorm asthma                                                                              |
| SNOMED CT  | 135171000119106   | Acute exacerbation of moderate persistent asthma                                                 |
| SNOMED CT  | 10675391000119101 | Severe controlled persistent asthma                                                              |
| SNOMED CT  | 10675751000119107 | Severe uncontrolled persistent asthma                                                            |
| SNOMED CT  | 10676271000119104 | Acute exacerbation of moderate persistent allergic asthma                                        |

#### 1.4.2 Atrial Fibrillation

Table 5: Concept codes used to identify atrial fibrillation flutter conditions.

| CodeSystem | ConceptCode        | ConceptName                                                    |
|------------|--------------------|----------------------------------------------------------------|
| ICD10CM    | I48.0              | Paroxysmal atrial fibrillation                                 |
| ICD10CM    | I48.11             | Longstanding persistent atrial fibrillation                    |
| ICD10CM    | I48.19             | Other persistent atrial fibrillation                           |
| ICD10CM    | I48.20             | Chronic atrial fibrillation, unspecified                       |
| ICD10CM    | I48.21             | Permanent atrial fibrillation                                  |
| ICD10CM    | I48.3              | Typical atrial flutter                                         |
| ICD10CM    | I48.4              | Atypical atrial flutter                                        |
| ICD10CM    | I48.91             | Unspecified atrial fibrillation                                |
| ICD10CM    | I48.92             | Unspecified atrial flutter                                     |
| ICD9CM     | 427.31             | Atrial fibrillation                                            |
| ICD9CM     | 427.32             | Atrial flutter                                                 |
| SNOMED CT  | 5370000            | Atrial flutter                                                 |
| SNOMED CT  | 120041000119109    | Atrial fibrillation with rapid ventricular response            |
| SNOMED CT  | 15964901000119107  | Atypical atrial flutter                                        |
| SNOMED CT  | 195080001          | Atrial fibrillation and flutter                                |
| SNOMED CT  | 233910005          | Lone atrial fibrillation                                       |
| SNOMED CT  | 233911009          | Non-rheumatic atrial fibrillation                              |
| SNOMED CT  | 314208002          | Rapid atrial fibrillation                                      |
| SNOMED CT  | 425615007          | Chronic atrial flutter                                         |
| SNOMED CT  | 426749004          | Chronic atrial fibrillation                                    |
| SNOMED CT  | 426814001          | Transient cerebral ischemia due to atrial fibrillation         |
| SNOMED CT  | 49436004           | Atrial fibrillation                                            |
| SNOMED CT  | 427665004          | Paroxysmal atrial flutter                                      |
| SNOMED CT  | 440028005          | Permanent atrial fibrillation                                  |
| SNOMED CT  | 440059007          | Persistent atrial fibrillation                                 |
| SNOMED CT  | 706923002          | Longstanding persistent atrial fibrillation                    |
| SNOMED CT  | 715395008          | Familial atrial fibrillation                                   |
| SNOMED CT  | 720448006          | Typical atrial flutter                                         |
| SNOMED CT  | 282825002          | Paroxysmal atrial fibrillation                                 |
| SNOMED CT  | 300996004          | Controlled atrial fibrillation                                 |
| SNOMED CT  | 762247006          | Preexcited atrial fibrillation                                 |
| SNOMED CT  | 280797561000119107 | Permanent atrial fibrillation due to heart valve disorder      |
| SNOMED CT  | 313377641000119105 | Atrial fibrillation due to heart valve disorder                |
| SNOMED CT  | 467643831000119105 | Paroxysmal atrial fibrillation due to heart valve disorder     |
| SNOMED CT  | 489609371000119104 | Persistent atrial fibrillation due to heart valve disorder     |
| SNOMED CT  | 715560009          | Idiopathic neonatal atrial flutter                             |
| SNOMED CT  | 1010405004         | Paroxysmal atrial fibrillation with rapid ventricular response |

### 1.4.3 Bariatric Surgery

Table 6: Concept codes used to identify bariatric surgery.

| CodeSystem | ConceptCode     | ConceptName                                                                |
|------------|-----------------|----------------------------------------------------------------------------|
| ICD10CM    | Z98.84          | Bariatric surgery status                                                   |
| SNOMED CT  | 329281000119107 | History of sleeve gastrectomy                                              |
| SNOMED CT  | 427074001       | Laparoscopic sleeve gastrectomy                                            |
| SNOMED CT  | 430715008       | Bariatric operative procedure                                              |
| SNOMED CT  | 442338001       | Bypass of stomach                                                          |
| SNOMED CT  | 608848006       | History of bariatric surgical procedure                                    |
| SNOMED CT  | 18692006        | Bypass gastroenterostomy                                                   |
| SNOMED CT  | 30803004        | Printen and Mason operation, high gastric bypass                           |
| SNOMED CT  | 1264335004      | Endoscopic ultrasonography guided gastrojejunostomy and insertion of stent |
| SNOMED CT  | 1172524007      | Primary obesity surgery endoluminal 2                                      |
| SNOMED CT  | 173587003       | Bypass of esophagus using stomach                                          |
| SNOMED CT  | 173748000       | Bypass of stomach by anastomosis of stomach to transposed jejunum          |
| SNOMED CT  | 173750008       | Conversion to anastomosis of stomach to transposed jejunum                 |
| SNOMED CT  | 173751007       | Conversion from previous anastomosis of stomach to transposed jejunum      |
| SNOMED CT  | 173857001       | Bypass of duodenum by anastomosis of stomach to jejunum                    |
| SNOMED CT  | 235281005       | Anterior gastrojejunostomy                                                 |
| SNOMED CT  | 235282003       | Anastomosis of stomach to ileum                                            |
| SNOMED CT  | 870378000       | Endoscopic sleeve gastropasty                                              |
| SNOMED CT  | 173747005       | Connection of stomach to transposed jejunum                                |
| SNOMED CT  | 433024005       | Gastrojejunostomy using fluoroscopic guidance                              |
| SNOMED CT  | 443906008       | Bypass of stomach with short limb Roux-en-Y gastroenterostomy              |
| SNOMED CT  | 708629005       | Laparoscopic bypass gastrojejunostomy                                      |
| SNOMED CT  | 708983005       | Laparoscopic bypass of stomach                                             |
| SNOMED CT  | 314593003       | Posterior gastrojejunostomy                                                |
| SNOMED CT  | 358575006       | Gastroduodenostomy                                                         |
| SNOMED CT  | 359529008       | Jaboulay operation, gastroduodenostomy                                     |
| SNOMED CT  | 265365007       | Bypass of stomach by anastomosis of stomach to duodenum                    |
| SNOMED CT  | 287834004       | Gastroenterostomy - no gastrectomy                                         |
| SNOMED CT  | 45753003        | Cholecystenterostomy with gastroenterostomy                                |
| SNOMED CT  | 49245001        | Bypass gastrojejunostomy                                                   |
| SNOMED CT  | 57245002        | Pylorostomy                                                                |
| ICD9CM     | V45.86          | Bariatric surgery status                                                   |

#### 1.4.4 Chronic Kidney Disease



Table 7: Concept codes used to identify chronic kidney disease conditions.

| CodeSystem | ConceptCode | ConceptName                                                                                                                                                     |
|------------|-------------|-----------------------------------------------------------------------------------------------------------------------------------------------------------------|
| ICD10CM    | D63.1       | Anemia in chronic kidney disease                                                                                                                                |
| ICD10CM    | E08.22      | Diabetes mellitus due to underlying condition with diabetic chronic kidney disease                                                                              |
| ICD10CM    | E09.22      | Drug or chemical induced diabetes mellitus with diabetic chronic kidney disease                                                                                 |
| ICD10CM    | E13.22      | Other specified diabetes mellitus with diabetic chronic kidney disease                                                                                          |
| ICD10CM    | I12         | Hypertensive chronic kidney disease                                                                                                                             |
| ICD10CM    | I12.0       | Hypertensive chronic kidney disease with stage 5 chronic kidney disease or end stage renal disease                                                              |
| ICD10CM    | I12.9       | Hypertensive chronic kidney disease with stage 1 through stage 4 chronic kidney disease, or unspecified chronic kidney disease                                  |
| ICD10CM    | I13         | Hypertensive heart and chronic kidney disease                                                                                                                   |
| ICD10CM    | I13.0       | Hypertensive heart and chronic kidney disease with heart failure and stage 1 through stage 4 chronic kidney disease, or unspecified chronic kidney disease      |
| ICD10CM    | I13.1       | Hypertensive heart and chronic kidney disease without heart failure                                                                                             |
| ICD10CM    | I13.10      | Hypertensive heart and chronic kidney disease without heart failure, with stage 1 through stage 4 chronic kidney disease, or unspecified chronic kidney disease |
| ICD10CM    | I13.11      | Hypertensive heart and chronic kidney disease without heart failure, with stage 5 chronic kidney disease, or end stage renal disease                            |
| ICD10CM    | I13.2       | Hypertensive heart and chronic kidney disease with heart failure and with stage 5 chronic kidney disease, or end stage renal disease                            |
| ICD10CM    | N18.30      | Chronic kidney disease, stage 3 unspecified                                                                                                                     |
| ICD10CM    | N18.31      | Chronic kidney disease, stage 3a                                                                                                                                |
| ICD10CM    | N18.32      | Chronic kidney disease, stage 3b                                                                                                                                |
| ICD10CM    | N18         | Chronic kidney disease (CKD)                                                                                                                                    |
| ICD10CM    | N18.1       | Chronic kidney disease, stage 1                                                                                                                                 |
| ICD10CM    | N18.2       | Chronic kidney disease, stage 2 (mild)                                                                                                                          |
| ICD10CM    | N18.3       | Chronic kidney disease, stage 3 (moderate)                                                                                                                      |
| ICD10CM    | N18.4       | Chronic kidney disease, stage 4 (severe)                                                                                                                        |
| ICD10CM    | N18.5       | Chronic kidney disease, stage 5                                                                                                                                 |
| ICD10CM    | N18.6       | End stage renal disease                                                                                                                                         |
| ICD10CM    | N18.9       | Chronic kidney disease, unspecified                                                                                                                             |
| ICD10CM    | O10.211     | Pre-existing hypertensive chronic kidney disease complicating pregnancy, first trimester                                                                        |

Continued on next page

**Table7 – continued from previous page**

| CodeSystem | ConceptCode  | ConceptName                                                                                              |
|------------|--------------|----------------------------------------------------------------------------------------------------------|
| ICD10CM    | O10.212      | Pre-existing hypertensive chronic kidney disease complicating pregnancy, second trimester                |
| ICD10CM    | O10.213      | Pre-existing hypertensive chronic kidney disease complicating pregnancy, third trimester                 |
| ICD10CM    | O10.219      | Pre-existing hypertensive chronic kidney disease complicating pregnancy, unspecified trimester           |
| ICD10CM    | O10.22       | Pre-existing hypertensive chronic kidney disease complicating childbirth                                 |
| ICD10CM    | O10.31       | Pre-existing hypertensive heart and chronic kidney disease complicating pregnancy                        |
| ICD10CM    | O10.311      | Pre-existing hypertensive heart and chronic kidney disease complicating pregnancy, first trimester       |
| ICD10CM    | O10.312      | Pre-existing hypertensive heart and chronic kidney disease complicating pregnancy, second trimester      |
| ICD10CM    | O10.313      | Pre-existing hypertensive heart and chronic kidney disease complicating pregnancy, third trimester       |
| ICD10CM    | O10.319      | Pre-existing hypertensive heart and chronic kidney disease complicating pregnancy, unspecified trimester |
| ICD10CM    | O10.32       | Pre-existing hypertensive heart and chronic kidney disease complicating childbirth                       |
| ICD10CM    | O10.33       | Pre-existing hypertensive heart and chronic kidney disease complicating the puerperium                   |
| ICD10CM    | Q61.2        | Polycystic kidney, adult type                                                                            |
| ICD10CM    | Q61.3        | Polycystic kidney, unspecified                                                                           |
| ICD10CM    | Q61.8        | Other cystic kidney diseases                                                                             |
| ICD10CM    | Z94.0        | Kidney transplant status                                                                                 |
| SNOMED CT  | 709044004    | Chronic kidney disease                                                                                   |
| SNOMED CT  | 16726004     | Renal osteodystrophy                                                                                     |
| SNOMED CT  | 1208934006   | Saglikler syndrome                                                                                       |
| SNOMED CT  | 776416004    | Hyperuricemia, pulmonary hypertension, renal failure, alkalosis syndrome                                 |
| SNOMED CT  | 711000119100 | Chronic kidney disease stage 5 due to type 2 diabetes mellitus                                           |
| SNOMED CT  | 721000119107 | Chronic kidney disease stage 4 due to type 2 diabetes mellitus                                           |
| SNOMED CT  | 731000119105 | Chronic kidney disease stage 3 due to type 2 diabetes mellitus                                           |
| SNOMED CT  | 741000119101 | Chronic kidney disease stage 2 due to type 2 diabetes mellitus                                           |
| SNOMED CT  | 751000119104 | Chronic kidney disease stage 1 due to type 2 diabetes mellitus                                           |
| SNOMED CT  | 771000119108 | Chronic kidney disease due to type 2 diabetes mellitus                                                   |

Continued on next page

**Table7 – continued from previous page**

| CodeSystem | ConceptCode     | ConceptName                                                                                            |
|------------|-----------------|--------------------------------------------------------------------------------------------------------|
| SNOMED CT  | 1801000119106   | Anemia, pre-end stage renal disease on erythropoietin protocol                                         |
| SNOMED CT  | 8501000119104   | Hypertensive heart and chronic kidney disease                                                          |
| SNOMED CT  | 71421000119105  | Hypertension in chronic kidney disease due to type 2 diabetes mellitus                                 |
| SNOMED CT  | 71701000119105  | Hypertension in chronic kidney disease due to type 1 diabetes mellitus                                 |
| SNOMED CT  | 90721000119101  | Chronic kidney disease stage 1 due to type 1 diabetes mellitus                                         |
| SNOMED CT  | 90731000119103  | Chronic kidney disease stage 2 due to type 1 diabetes mellitus                                         |
| SNOMED CT  | 90741000119107  | Chronic kidney disease stage 3 due to type 1 diabetes mellitus                                         |
| SNOMED CT  | 90751000119109  | Chronic kidney disease stage 4 due to type 1 diabetes mellitus                                         |
| SNOMED CT  | 90761000119106  | Chronic kidney disease stage 5 due to type 1 diabetes mellitus                                         |
| SNOMED CT  | 90771000119100  | End stage renal disease on dialysis due to type 1 diabetes mellitus                                    |
| SNOMED CT  | 90791000119104  | End stage renal disease on dialysis due to type 2 diabetes mellitus                                    |
| SNOMED CT  | 96441000119101  | Chronic kidney disease due to type 1 diabetes mellitus                                                 |
| SNOMED CT  | 96701000119107  | Hypertensive heart AND chronic kidney disease on dialysis                                              |
| SNOMED CT  | 96711000119105  | Hypertensive heart AND chronic kidney disease stage 5                                                  |
| SNOMED CT  | 96721000119103  | Hypertensive heart AND chronic kidney disease stage 4                                                  |
| SNOMED CT  | 96731000119100  | Hypertensive heart AND chronic kidney disease stage 3                                                  |
| SNOMED CT  | 96741000119109  | Hypertensive heart AND chronic kidney disease stage 2                                                  |
| SNOMED CT  | 96751000119106  | Hypertensive heart AND chronic kidney disease stage 1                                                  |
| SNOMED CT  | 104931000119100 | Chronic kidney disease due to hypertension                                                             |
| SNOMED CT  | 111411000119103 | End stage renal disease due to hypertension                                                            |
| SNOMED CT  | 117681000119102 | Chronic kidney disease stage 1 due to hypertension                                                     |
| SNOMED CT  | 118781000119108 | Pre-existing hypertensive chronic kidney disease in mother complicating pregnancy                      |
| SNOMED CT  | 120261000119101 | Benign hypertensive heart disease and chronic renal disease stage 5                                    |
| SNOMED CT  | 127991000119101 | Hypertension concurrent and due to end stage renal disease on dialysis due to type 2 diabetes mellitus |
| SNOMED CT  | 128001000119105 | Hypertension concurrent and due to end stage renal disease on dialysis due to type 1 diabetes mellitus |
| SNOMED CT  | 129151000119102 | Chronic kidney disease stage 4 due to hypertension                                                     |
| SNOMED CT  | 129161000119100 | Chronic kidney disease stage 5 due to hypertension                                                     |
| SNOMED CT  | 129171000119106 | Chronic kidney disease stage 3 due to hypertension                                                     |
| SNOMED CT  | 129181000119109 | Chronic kidney disease stage 2 due to hypertension                                                     |

Continued on next page

**Table7 – continued from previous page**

| CodeSystem | ConceptCode       | ConceptName                                                                                  |
|------------|-------------------|----------------------------------------------------------------------------------------------|
| SNOMED CT  | 140101000119109   | Hypertension in chronic kidney disease stage 5 due to type 2 diabetes mellitus               |
| SNOMED CT  | 140111000119107   | Hypertension in chronic kidney disease stage 4 due to type 2 diabetes mellitus               |
| SNOMED CT  | 140121000119100   | Hypertension in chronic kidney disease stage 3 due to type 2 diabetes mellitus               |
| SNOMED CT  | 140131000119102   | Hypertension in chronic kidney disease stage 2 due to type 2 diabetes mellitus               |
| SNOMED CT  | 153851000119106   | Malignant hypertensive chronic kidney disease stage 5                                        |
| SNOMED CT  | 153891000119101   | End stage renal disease on dialysis due to hypertension                                      |
| SNOMED CT  | 284961000119106   | Chronic kidney disease due to benign hypertension                                            |
| SNOMED CT  | 284971000119100   | Chronic kidney disease stage 1 due to benign hypertension                                    |
| SNOMED CT  | 284981000119102   | Chronic kidney disease stage 2 due to benign hypertension                                    |
| SNOMED CT  | 284991000119104   | Chronic kidney disease stage 3 due to benign hypertension                                    |
| SNOMED CT  | 285001000119105   | Chronic kidney disease stage 4 due to benign hypertension                                    |
| SNOMED CT  | 285011000119108   | Chronic kidney disease stage 5 due to benign hypertension                                    |
| SNOMED CT  | 285041000119107   | Benign hypertensive heart disease and chronic renal disease stage 1                          |
| SNOMED CT  | 285061000119106   | Benign hypertensive heart disease and chronic renal disease stage 2                          |
| SNOMED CT  | 285081000119102   | Benign hypertensive heart disease and chronic renal disease stage 3                          |
| SNOMED CT  | 285101000119109   | Benign hypertensive heart disease and chronic renal disease stage 4                          |
| SNOMED CT  | 285831000119108   | Malignant hypertensive chronic kidney disease                                                |
| SNOMED CT  | 285841000119104   | Malignant hypertensive end stage renal disease                                               |
| SNOMED CT  | 285851000119102   | Malignant hypertensive chronic kidney disease stage 1                                        |
| SNOMED CT  | 285861000119100   | Malignant hypertensive chronic kidney disease stage 2                                        |
| SNOMED CT  | 285871000119106   | Malignant hypertensive chronic kidney disease stage 3                                        |
| SNOMED CT  | 285881000119109   | Malignant hypertensive chronic kidney disease stage 4                                        |
| SNOMED CT  | 285911000119109   | Malignant hypertensive heart disease and chronic renal disease stage 3                       |
| SNOMED CT  | 285921000119102   | Malignant hypertensive heart disease and chronic renal disease stage 4                       |
| SNOMED CT  | 286371000119107   | Malignant hypertensive end stage renal disease on dialysis                                   |
| SNOMED CT  | 434431000124103   | Hypertensive end stage renal disease                                                         |
| SNOMED CT  | 449631000124102   | Benign hypertensive heart disease and chronic renal disease                                  |
| SNOMED CT  | 691421000119108   | Anemia co-occurrent and due to chronic kidney disease stage 3                                |
| SNOMED CT  | 10757401000119104 | Pre-existing hypertensive heart and chronic kidney disease in mother complicating childbirth |
| SNOMED CT  | 10757481000119107 | Pre-existing hypertensive heart and chronic kidney disease in mother complicating pregnancy  |

Continued on next page

**Table7 – continued from previous page**

| CodeSystem | ConceptCode     | ConceptName                                                                |
|------------|-----------------|----------------------------------------------------------------------------|
| SNOMED CT  | 236433006       | Acute-on-chronic renal failure                                             |
| SNOMED CT  | 236434000       | End stage renal failure untreated by renal replacement therapy             |
| SNOMED CT  | 236435004       | End stage renal failure on dialysis                                        |
| SNOMED CT  | 236436003       | End stage renal failure with renal transplant                              |
| SNOMED CT  | 236552002       | Adynamic bone disease                                                      |
| SNOMED CT  | 425369003       | Chronic progressive renal failure                                          |
| SNOMED CT  | 46177005        | End-stage renal disease                                                    |
| SNOMED CT  | 49708008        | Anemia of chronic renal failure                                            |
| SNOMED CT  | 57557005        | Chronic milk alkali syndrome                                               |
| SNOMED CT  | 431855005       | Chronic kidney disease stage 1                                             |
| SNOMED CT  | 431856006       | Chronic kidney disease stage 2                                             |
| SNOMED CT  | 431857002       | Chronic kidney disease stage 4                                             |
| SNOMED CT  | 433144002       | Chronic kidney disease stage 3                                             |
| SNOMED CT  | 433146000       | Chronic kidney disease stage 5                                             |
| SNOMED CT  | 700378005       | Chronic kidney disease stage 3A                                            |
| SNOMED CT  | 700379002       | Chronic kidney disease stage 3B                                            |
| SNOMED CT  | 704667004       | Hypertension concurrent and due to end stage renal disease on dialysis     |
| SNOMED CT  | 707324008       | Anemia in end stage renal disease                                          |
| SNOMED CT  | 708975004       | Mixed renal osteodystrophy                                                 |
| SNOMED CT  | 712487000       | End stage renal disease due to benign hypertension                         |
| SNOMED CT  | 713313000       | Chronic kidney disease mineral and bone disorder                           |
| SNOMED CT  | 714152005       | Chronic kidney disease stage 5 on dialysis                                 |
| SNOMED CT  | 714153000       | Chronic kidney disease stage 5 with transplant                             |
| SNOMED CT  | 722098007       | Chronic kidney disease following donor nephrectomy                         |
| SNOMED CT  | 722149000       | Chronic kidney disease due to and following excision of neoplasm of kidney |
| SNOMED CT  | 722150000       | Chronic kidney disease due to systemic infection                           |
| SNOMED CT  | 722467000       | Chronic kidney disease due to traumatic loss of kidney                     |
| SNOMED CT  | 723190009       | Chronic renal insufficiency                                                |
| SNOMED CT  | 368421000119108 | Chronic kidney disease stage 1 due to drug induced diabetes mellitus       |
| SNOMED CT  | 368431000119106 | Chronic kidney disease stage 2 due to drug induced diabetes mellitus       |
| SNOMED CT  | 368441000119102 | Chronic kidney disease stage 3 due to drug induced diabetes mellitus       |
| SNOMED CT  | 368451000119100 | Chronic kidney disease stage 4 due to drug induced diabetes mellitus       |
| SNOMED CT  | 368461000119103 | Chronic kidney disease stage 5 due to drug induced diabetes mellitus       |
| SNOMED CT  | 368471000119109 | End stage renal disease on dialysis due to drug induced diabetes mellitus  |

Continued on next page

**Table7 – continued from previous page**

| CodeSystem | ConceptCode | ConceptName                                     |
|------------|-------------|-------------------------------------------------|
| SNOMED CT  | 897308007   | Chronic kidney disease with osteoporosis        |
| SNOMED CT  | 897310009   | Renal osteodystrophy with high bone turnover    |
| SNOMED CT  | 897311008   | Renal osteodystrophy with normal bone turnover  |
| SNOMED CT  | 897312001   | Renal osteodystrophy with low bone turnover     |
| SNOMED CT  | 90688005    | Chronic renal failure                           |
| SNOMED CT  | 1217070004  | Renal osteodystrophy due to hyperparathyroidism |

### 1.4.5 COPD

Table 8: Concept codes used to identify chronic obstructive pulmonary disease conditions.

| CodeSystem | ConceptCode | ConceptName                                                                    |
|------------|-------------|--------------------------------------------------------------------------------|
| ICD10CM    | J41         | Simple and mucopurulent chronic bronchitis                                     |
| ICD10CM    | J42         | Unspecified chronic bronchitis                                                 |
| ICD10CM    | J43         | Emphysema                                                                      |
| ICD10CM    | J44.0       | Chronic obstructive pulmonary disease with (acute) lower respiratory infection |
| ICD10CM    | J44.1       | Chronic obstructive pulmonary disease with (acute) exacerbation                |
| ICD10CM    | J44.9       | Chronic obstructive pulmonary disease, unspecified                             |
| ICD10CM    | J41.0       | Simple chronic bronchitis                                                      |
| ICD10CM    | J41.1       | Mucopurulent chronic bronchitis                                                |
| ICD10CM    | J41.8       | Mixed simple and mucopurulent chronic bronchitis                               |
| ICD10CM    | J43.0       | Unilateral pulmonary emphysema [MacLeod's syndrome]                            |
| ICD10CM    | J43.1       | Panlobular emphysema                                                           |
| ICD10CM    | J43.2       | Centrilobular emphysema                                                        |
| ICD10CM    | J43.8       | Other emphysema                                                                |
| ICD10CM    | J43.9       | Emphysema, unspecified                                                         |
| SNOMED CT  | 13645005    | Chronic obstructive lung disease                                               |
| SNOMED CT  | 195951007   | Acute exacerbation of chronic obstructive airways disease                      |
| SNOMED CT  | 196001008   | Chronic obstructive pulmonary disease with acute lower respiratory infection   |
| SNOMED CT  | 135836000   | End stage chronic obstructive airways disease                                  |
| SNOMED CT  | 313296004   | Mild chronic obstructive pulmonary disease                                     |
| SNOMED CT  | 313297008   | Moderate chronic obstructive pulmonary disease                                 |
| SNOMED CT  | 313299006   | Severe chronic obstructive pulmonary disease                                   |
| SNOMED CT  | 708030004   | Pulmonary emphysema co-occurrent with fibrosis of lung                         |
| SNOMED CT  | 285381006   | Acute infective exacerbation of chronic obstructive airways disease            |
| SNOMED CT  | 86680006    | Ruptured emphysematous bleb of lung                                            |

Continued on next page

**Table8 – continued from previous page**

| CodeSystem | ConceptCode       | ConceptName                                                                                 |
|------------|-------------------|---------------------------------------------------------------------------------------------|
| SNOMED CT  | 87433001          | Pulmonary emphysema                                                                         |
| SNOMED CT  | 4981000           | Panacinar emphysema                                                                         |
| SNOMED CT  | 16003001          | Giant bullous emphysema                                                                     |
| SNOMED CT  | 16846004          | Obstructive emphysema                                                                       |
| SNOMED CT  | 23958009          | Vanishing lung                                                                              |
| SNOMED CT  | 31898008          | Paraseptal emphysema                                                                        |
| SNOMED CT  | 33325001          | Compensatory emphysema                                                                      |
| SNOMED CT  | 1177120001        | Bronchiolitis obliterans syndrome due to and following al-<br>logeneic stem cell transplant |
| SNOMED CT  | 762618008         | Bronchiolitis obliterans syndrome due to and after lung<br>transplantation                  |
| SNOMED CT  | 836477007         | Chronic emphysema due to vapor                                                              |
| SNOMED CT  | 840350008         | Chronic obliterative bronchiolitis due to chemical fumes                                    |
| SNOMED CT  | 840351007         | Chronic obliterative bronchiolitis due to vapor                                             |
| SNOMED CT  | 1751000119100     | Acute exacerbation of chronic obstructive airways disease<br>with asthma                    |
| SNOMED CT  | 106001000119101   | Chronic obstructive lung disease co-occurrent with acute<br>bronchitis                      |
| SNOMED CT  | 10692761000119107 | Asthma-chronic obstructive pulmonary disease overlap syn-<br>drome                          |
| SNOMED CT  | 233674008         | Pulmonary emphysema in alpha-1 primary immunodef-<br>iciency deficiency                     |
| SNOMED CT  | 195957006         | Chronic bullous emphysema                                                                   |
| SNOMED CT  | 195958001         | Segmental bullous emphysema                                                                 |
| SNOMED CT  | 195959009         | Zonal bullous emphysema                                                                     |
| SNOMED CT  | 196026004         | Chronic emphysema due to chemical fumes                                                     |
| SNOMED CT  | 233675009         | Toxic emphysema                                                                             |
| SNOMED CT  | 233677001         | Scar emphysema                                                                              |
| SNOMED CT  | 47895001          | Congenital emphysema                                                                        |
| SNOMED CT  | 47938003          | Chronic obliterative bronchiolitis                                                          |
| SNOMED CT  | 57686001          | Emphysematous bleb of lung                                                                  |
| SNOMED CT  | 60805002          | Hemolytic anemia with emphysema AND cutis laxa                                              |
| SNOMED CT  | 66987001          | Congenital lobar emphysema                                                                  |
| SNOMED CT  | 68328006          | Centriacinar emphysema                                                                      |
| SNOMED CT  | 70756004          | Bronchial atresia with segmental pulmonary emphysema                                        |
| SNOMED CT  | 77690003          | Interstitial emphysema of lung                                                              |
| SNOMED CT  | 266355005         | Bullous emphysema with collapse                                                             |
| SNOMED CT  | 266356006         | Atrophic (senile) emphysema                                                                 |
| SNOMED CT  | 1010333003        | Emphysema of left lung                                                                      |
| SNOMED CT  | 1010334009        | Emphysema of right lung                                                                     |

#### 1.4.6 Glaucoma

Table 9: Concept codes used to identify glaucoma conditions.

| CodeSystem | ConceptCode | ConceptName                                                 |
|------------|-------------|-------------------------------------------------------------|
| ICD10CM    | H40.10X0    | Unspecified open-angle glaucoma, stage unspecified          |
| ICD10CM    | H40.10X1    | Unspecified open-angle glaucoma, mild stage                 |
| ICD10CM    | H40.10X2    | Unspecified open-angle glaucoma, moderate stage             |
| ICD10CM    | H40.10X3    | Unspecified open-angle glaucoma, severe stage               |
| ICD10CM    | H40.10X4    | Unspecified open-angle glaucoma, indeterminate stage        |
| ICD10CM    | H40.1110    | Primary open-angle glaucoma, right eye, stage unspecified   |
| ICD10CM    | H40.1111    | Primary open-angle glaucoma, right eye, mild stage          |
| ICD10CM    | H40.1112    | Primary open-angle glaucoma, right eye, moderate stage      |
| ICD10CM    | H40.1113    | Primary open-angle glaucoma, right eye, severe stage        |
| ICD10CM    | H40.1114    | Primary open-angle glaucoma, right eye, indeterminate stage |
| ICD10CM    | H40.1120    | Primary open-angle glaucoma, left eye, stage unspecified    |
| ICD10CM    | H40.1121    | Primary open-angle glaucoma, left eye, mild stage           |
| ICD10CM    | H40.1122    | Primary open-angle glaucoma, left eye, moderate stage       |
| ICD10CM    | H40.1123    | Primary open-angle glaucoma, left eye, severe stage         |
| ICD10CM    | H40.1124    | Primary open-angle glaucoma, left eye, indeterminate stage  |
| ICD10CM    | H40.1130    | Primary open-angle glaucoma, bilateral, stage unspecified   |
| ICD10CM    | H40.1131    | Primary open-angle glaucoma, bilateral, mild stage          |
| ICD10CM    | H40.1132    | Primary open-angle glaucoma, bilateral, moderate stage      |
| ICD10CM    | H40.1133    | Primary open-angle glaucoma, bilateral, severe stage        |
| ICD10CM    | H40.1134    | Primary open-angle glaucoma, bilateral, indeterminate stage |
| ICD10CM    | H40.1210    | Low-tension glaucoma, right eye, stage unspecified          |
| ICD10CM    | H40.1211    | Low-tension glaucoma, right eye, mild stage                 |
| ICD10CM    | H40.1212    | Low-tension glaucoma, right eye, moderate stage             |
| ICD10CM    | H40.1213    | Low-tension glaucoma, right eye, severe stage               |
| ICD10CM    | H40.1214    | Low-tension glaucoma, right eye, indeterminate stage        |
| ICD10CM    | H40.1220    | Low-tension glaucoma, left eye, stage unspecified           |
| ICD10CM    | H40.1221    | Low-tension glaucoma, left eye, mild stage                  |
| ICD10CM    | H40.1222    | Low-tension glaucoma, left eye, moderate stage              |
| ICD10CM    | H40.1223    | Low-tension glaucoma, left eye, severe stage                |
| ICD10CM    | H40.1224    | Low-tension glaucoma, left eye, indeterminate stage         |
| ICD10CM    | H40.1230    | Low-tension glaucoma, bilateral, stage unspecified          |
| ICD10CM    | H40.1231    | Low-tension glaucoma, bilateral, mild stage                 |
| ICD10CM    | H40.1232    | Low-tension glaucoma, bilateral, moderate stage             |
| ICD10CM    | H40.1233    | Low-tension glaucoma, bilateral, severe stage               |
| ICD10CM    | H40.1234    | Low-tension glaucoma, bilateral, indeterminate stage        |
| ICD10CM    | H40.1310    | Pigmentary glaucoma, right eye, stage unspecified           |
| ICD10CM    | H40.1311    | Pigmentary glaucoma, right eye, mild stage                  |
| ICD10CM    | H40.1312    | Pigmentary glaucoma, right eye, moderate stage              |
| ICD10CM    | H40.1313    | Pigmentary glaucoma, right eye, severe stage                |
| ICD10CM    | H40.1314    | Pigmentary glaucoma, right eye, indeterminate stage         |

Continued on next page



**Table9 – continued from previous page**

| CodeSystem | ConceptCode | ConceptName                                                                      |
|------------|-------------|----------------------------------------------------------------------------------|
| ICD10CM    | H40.1320    | Pigmentary glaucoma, left eye, stage unspecified                                 |
| ICD10CM    | H40.1321    | Pigmentary glaucoma, left eye, mild stage                                        |
| ICD10CM    | H40.1322    | Pigmentary glaucoma, left eye, moderate stage                                    |
| ICD10CM    | H40.1323    | Pigmentary glaucoma, left eye, severe stage                                      |
| ICD10CM    | H40.1324    | Pigmentary glaucoma, left eye, indeterminate stage                               |
| ICD10CM    | H40.1330    | Pigmentary glaucoma, bilateral, stage unspecified                                |
| ICD10CM    | H40.1331    | Pigmentary glaucoma, bilateral, mild stage                                       |
| ICD10CM    | H40.1332    | Pigmentary glaucoma, bilateral, moderate stage                                   |
| ICD10CM    | H40.1333    | Pigmentary glaucoma, bilateral, severe stage                                     |
| ICD10CM    | H40.1334    | Pigmentary glaucoma, bilateral, indeterminate stage                              |
| ICD10CM    | H40.1410    | Capsular glaucoma with pseudoexfoliation of lens, right eye, stage unspecified   |
| ICD10CM    | H40.1411    | Capsular glaucoma with pseudoexfoliation of lens, right eye, mild stage          |
| ICD10CM    | H40.1412    | Capsular glaucoma with pseudoexfoliation of lens, right eye, moderate stage      |
| ICD10CM    | H40.1413    | Capsular glaucoma with pseudoexfoliation of lens, right eye, severe stage        |
| ICD10CM    | H40.1414    | Capsular glaucoma with pseudoexfoliation of lens, right eye, indeterminate stage |
| ICD10CM    | H40.1420    | Capsular glaucoma with pseudoexfoliation of lens, left eye, stage unspecified    |
| ICD10CM    | H40.1421    | Capsular glaucoma with pseudoexfoliation of lens, left eye, mild stage           |
| ICD10CM    | H40.1422    | Capsular glaucoma with pseudoexfoliation of lens, left eye, moderate stage       |
| ICD10CM    | H40.1423    | Capsular glaucoma with pseudoexfoliation of lens, left eye, severe stage         |
| ICD10CM    | H40.1424    | Capsular glaucoma with pseudoexfoliation of lens, left eye, indeterminate stage  |
| ICD10CM    | H40.1430    | Capsular glaucoma with pseudoexfoliation of lens, bilateral, stage unspecified   |
| ICD10CM    | H40.1431    | Capsular glaucoma with pseudoexfoliation of lens, bilateral, mild stage          |
| ICD10CM    | H40.1432    | Capsular glaucoma with pseudoexfoliation of lens, bilateral, moderate stage      |
| ICD10CM    | H40.1433    | Capsular glaucoma with pseudoexfoliation of lens, bilateral, severe stage        |
| ICD10CM    | H40.1434    | Capsular glaucoma with pseudoexfoliation of lens, bilateral, indeterminate stage |
| ICD10CM    | H40.151     | Residual stage of open-angle glaucoma, right eye                                 |
| ICD10CM    | H40.152     | Residual stage of open-angle glaucoma, left eye                                  |
| ICD10CM    | H40.153     | Residual stage of open-angle glaucoma, bilateral                                 |

Continued on next page

**Table9 – continued from previous page**

| CodeSystem | ConceptCode | ConceptName                                                      |
|------------|-------------|------------------------------------------------------------------|
| ICD10CM    | H40.20X0    | Unspecified primary angle-closure glaucoma, stage unspecified    |
| ICD10CM    | H40.20X1    | Unspecified primary angle-closure glaucoma, mild stage           |
| ICD10CM    | H40.20X2    | Unspecified primary angle-closure glaucoma, moderate stage       |
| ICD10CM    | H40.20X3    | Unspecified primary angle-closure glaucoma, severe stage         |
| ICD10CM    | H40.20X4    | Unspecified primary angle-closure glaucoma, indeterminate stage  |
| ICD10CM    | H40.211     | Acute angle-closure glaucoma, right eye                          |
| ICD10CM    | H40.212     | Acute angle-closure glaucoma, left eye                           |
| ICD10CM    | H40.213     | Acute angle-closure glaucoma, bilateral                          |
| ICD10CM    | H40.2210    | Chronic angle-closure glaucoma, right eye, stage unspecified     |
| ICD10CM    | H40.2211    | Chronic angle-closure glaucoma, right eye, mild stage            |
| ICD10CM    | H40.2212    | Chronic angle-closure glaucoma, right eye, moderate stage        |
| ICD10CM    | H40.2213    | Chronic angle-closure glaucoma, right eye, severe stage          |
| ICD10CM    | H40.2214    | Chronic angle-closure glaucoma, right eye, indeterminate stage   |
| ICD10CM    | H40.2220    | Chronic angle-closure glaucoma, left eye, stage unspecified      |
| ICD10CM    | H40.2221    | Chronic angle-closure glaucoma, left eye, mild stage             |
| ICD10CM    | H40.2222    | Chronic angle-closure glaucoma, left eye, moderate stage         |
| ICD10CM    | H40.2223    | Chronic angle-closure glaucoma, left eye, severe stage           |
| ICD10CM    | H40.2224    | Chronic angle-closure glaucoma, left eye, indeterminate stage    |
| ICD10CM    | H40.2230    | Chronic angle-closure glaucoma, bilateral, stage unspecified     |
| ICD10CM    | H40.2231    | Chronic angle-closure glaucoma, bilateral, mild stage            |
| ICD10CM    | H40.2232    | Chronic angle-closure glaucoma, bilateral, moderate stage        |
| ICD10CM    | H40.2233    | Chronic angle-closure glaucoma, bilateral, severe stage          |
| ICD10CM    | H40.2234    | Chronic angle-closure glaucoma, bilateral, indeterminate stage   |
| ICD10CM    | H40.231     | Intermittent angle-closure glaucoma, right eye                   |
| ICD10CM    | H40.232     | Intermittent angle-closure glaucoma, left eye                    |
| ICD10CM    | H40.233     | Intermittent angle-closure glaucoma, bilateral                   |
| ICD10CM    | H40.241     | Residual stage of angle-closure glaucoma, right eye              |
| ICD10CM    | H40.242     | Residual stage of angle-closure glaucoma, left eye               |
| ICD10CM    | H40.243     | Residual stage of angle-closure glaucoma, bilateral              |
| ICD10CM    | H40.31X0    | Glaucoma secondary to eye trauma, right eye, stage unspecified   |
| ICD10CM    | H40.31X1    | Glaucoma secondary to eye trauma, right eye, mild stage          |
| ICD10CM    | H40.31X2    | Glaucoma secondary to eye trauma, right eye, moderate stage      |
| ICD10CM    | H40.31X3    | Glaucoma secondary to eye trauma, right eye, severe stage        |
| ICD10CM    | H40.31X4    | Glaucoma secondary to eye trauma, right eye, indeterminate stage |

Continued on next page

**Table9 – continued from previous page**

| CodeSystem | ConceptCode | ConceptName                                                            |
|------------|-------------|------------------------------------------------------------------------|
| ICD10CM    | H40.32X0    | Glaucoma secondary to eye trauma, left eye, stage unspecified          |
| ICD10CM    | H40.32X1    | Glaucoma secondary to eye trauma, left eye, mild stage                 |
| ICD10CM    | H40.32X2    | Glaucoma secondary to eye trauma, left eye, moderate stage             |
| ICD10CM    | H40.32X3    | Glaucoma secondary to eye trauma, left eye, severe stage               |
| ICD10CM    | H40.32X4    | Glaucoma secondary to eye trauma, left eye, indeterminate stage        |
| ICD10CM    | H40.33X0    | Glaucoma secondary to eye trauma, bilateral, stage unspecified         |
| ICD10CM    | H40.33X1    | Glaucoma secondary to eye trauma, bilateral, mild stage                |
| ICD10CM    | H40.33X2    | Glaucoma secondary to eye trauma, bilateral, moderate stage            |
| ICD10CM    | H40.33X3    | Glaucoma secondary to eye trauma, bilateral, severe stage              |
| ICD10CM    | H40.33X4    | Glaucoma secondary to eye trauma, bilateral, indeterminate stage       |
| ICD10CM    | H40.41X0    | Glaucoma secondary to eye inflammation, right eye, stage unspecified   |
| ICD10CM    | H40.41X1    | Glaucoma secondary to eye inflammation, right eye, mild stage          |
| ICD10CM    | H40.41X2    | Glaucoma secondary to eye inflammation, right eye, moderate stage      |
| ICD10CM    | H40.41X3    | Glaucoma secondary to eye inflammation, right eye, severe stage        |
| ICD10CM    | H40.41X4    | Glaucoma secondary to eye inflammation, right eye, indeterminate stage |
| ICD10CM    | H40.42X0    | Glaucoma secondary to eye inflammation, left eye, stage unspecified    |
| ICD10CM    | H40.42X1    | Glaucoma secondary to eye inflammation, left eye, mild stage           |
| ICD10CM    | H40.42X2    | Glaucoma secondary to eye inflammation, left eye, moderate stage       |
| ICD10CM    | H40.42X3    | Glaucoma secondary to eye inflammation, left eye, severe stage         |
| ICD10CM    | H40.42X4    | Glaucoma secondary to eye inflammation, left eye, indeterminate stage  |
| ICD10CM    | H40.43X0    | Glaucoma secondary to eye inflammation, bilateral, stage unspecified   |
| ICD10CM    | H40.43X1    | Glaucoma secondary to eye inflammation, bilateral, mild stage          |
| ICD10CM    | H40.43X2    | Glaucoma secondary to eye inflammation, bilateral, moderate stage      |
| ICD10CM    | H40.43X3    | Glaucoma secondary to eye inflammation, bilateral, severe stage        |

Continued on next page

**Table9 – continued from previous page**

| CodeSystem | ConceptCode | ConceptName                                                               |
|------------|-------------|---------------------------------------------------------------------------|
| ICD10CM    | H40.43X4    | Glaucoma secondary to eye inflammation, bilateral, indeterminate stage    |
| ICD10CM    | H40.51X0    | Glaucoma secondary to other eye disorders, right eye, stage unspecified   |
| ICD10CM    | H40.51X1    | Glaucoma secondary to other eye disorders, right eye, mild stage          |
| ICD10CM    | H40.51X2    | Glaucoma secondary to other eye disorders, right eye, moderate stage      |
| ICD10CM    | H40.51X3    | Glaucoma secondary to other eye disorders, right eye, severe stage        |
| ICD10CM    | H40.51X4    | Glaucoma secondary to other eye disorders, right eye, indeterminate stage |
| ICD10CM    | H40.52X0    | Glaucoma secondary to other eye disorders, left eye, stage unspecified    |
| ICD10CM    | H40.52X1    | Glaucoma secondary to other eye disorders, left eye, mild stage           |
| ICD10CM    | H40.52X2    | Glaucoma secondary to other eye disorders, left eye, moderate stage       |
| ICD10CM    | H40.52X3    | Glaucoma secondary to other eye disorders, left eye, severe stage         |
| ICD10CM    | H40.52X4    | Glaucoma secondary to other eye disorders, left eye, indeterminate stage  |
| ICD10CM    | H40.53X0    | Glaucoma secondary to other eye disorders, bilateral, stage unspecified   |
| ICD10CM    | H40.53X1    | Glaucoma secondary to other eye disorders, bilateral, mild stage          |
| ICD10CM    | H40.53X2    | Glaucoma secondary to other eye disorders, bilateral, moderate stage      |
| ICD10CM    | H40.53X3    | Glaucoma secondary to other eye disorders, bilateral, severe stage        |
| ICD10CM    | H40.53X4    | Glaucoma secondary to other eye disorders, bilateral, indeterminate stage |
| ICD10CM    | H40.61X0    | Glaucoma secondary to drugs, right eye, stage unspecified                 |
| ICD10CM    | H40.61X1    | Glaucoma secondary to drugs, right eye, mild stage                        |
| ICD10CM    | H40.61X2    | Glaucoma secondary to drugs, right eye, moderate stage                    |
| ICD10CM    | H40.61X3    | Glaucoma secondary to drugs, right eye, severe stage                      |
| ICD10CM    | H40.61X4    | Glaucoma secondary to drugs, right eye, indeterminate stage               |
| ICD10CM    | H40.62X0    | Glaucoma secondary to drugs, left eye, stage unspecified                  |
| ICD10CM    | H40.62X1    | Glaucoma secondary to drugs, left eye, mild stage                         |
| ICD10CM    | H40.62X2    | Glaucoma secondary to drugs, left eye, moderate stage                     |
| ICD10CM    | H40.62X3    | Glaucoma secondary to drugs, left eye, severe stage                       |
| ICD10CM    | H40.62X4    | Glaucoma secondary to drugs, left eye, indeterminate stage                |

Continued on next page

**Table9 – continued from previous page**

| CodeSystem | ConceptCode | ConceptName                                                           |
|------------|-------------|-----------------------------------------------------------------------|
| ICD10CM    | H40.63X0    | Glaucoma secondary to drugs, bilateral, stage unspecified             |
| ICD10CM    | H40.63X1    | Glaucoma secondary to drugs, bilateral, mild stage                    |
| ICD10CM    | H40.63X2    | Glaucoma secondary to drugs, bilateral, moderate stage                |
| ICD10CM    | H40.63X3    | Glaucoma secondary to drugs, bilateral, severe stage                  |
| ICD10CM    | H40.63X4    | Glaucoma secondary to drugs, bilateral, indeterminate stage           |
| ICD10CM    | H40.811     | Glaucoma with increased episcleral venous pressure, right eye         |
| ICD10CM    | H40.812     | Glaucoma with increased episcleral venous pressure, left eye          |
| ICD10CM    | H40.813     | Glaucoma with increased episcleral venous pressure, bilateral         |
| ICD10CM    | H40.821     | Hypersecretion glaucoma, right eye                                    |
| ICD10CM    | H40.822     | Hypersecretion glaucoma, left eye                                     |
| ICD10CM    | H40.823     | Hypersecretion glaucoma, bilateral                                    |
| ICD10CM    | H40.831     | Aqueous misdirection, right eye                                       |
| ICD10CM    | H40.832     | Aqueous misdirection, left eye                                        |
| ICD10CM    | H40.833     | Aqueous misdirection, bilateral                                       |
| ICD10CM    | H40.89      | Other specified glaucoma                                              |
| ICD10CM    | Q15.0       | Congenital glaucoma                                                   |
| ICD10CM    | H40.1510    | Residual stage of open-angle glaucoma, right eye, stage unspecified   |
| ICD10CM    | H40.1511    | Residual stage of open-angle glaucoma, right eye, mild stage          |
| ICD10CM    | H40.1512    | Residual stage of open-angle glaucoma, right eye, moderate stage      |
| ICD10CM    | H40.1513    | Residual stage of open-angle glaucoma, right eye, severe stage        |
| ICD10CM    | H40.1514    | Residual stage of open-angle glaucoma, right eye, indeterminate stage |
| ICD10CM    | H40.1520    | Residual stage of open-angle glaucoma, left eye, stage unspecified    |
| ICD10CM    | H40.1521    | Residual stage of open-angle glaucoma, left eye, mild stage           |
| ICD10CM    | H40.1522    | Residual stage of open-angle glaucoma, left eye, moderate stage       |
| ICD10CM    | H40.1523    | Residual stage of open-angle glaucoma, left eye, severe stage         |
| ICD10CM    | H40.1524    | Residual stage of open-angle glaucoma, left eye, indeterminate stage  |
| ICD10CM    | H40.1530    | Residual stage of open-angle glaucoma, bilateral, stage unspecified   |
| ICD10CM    | H40.1531    | Residual stage of open-angle glaucoma, bilateral, mild stage          |
| ICD10CM    | H40.1532    | Residual stage of open-angle glaucoma, bilateral, moderate stage      |
| ICD10CM    | H40.1533    | Residual stage of open-angle glaucoma, bilateral, severe stage        |

Continued on next page

**Table9 – continued from previous page**

| CodeSystem | ConceptCode       | ConceptName                                                           |
|------------|-------------------|-----------------------------------------------------------------------|
| ICD10CM    | H40.1534          | Residual stage of open-angle glaucoma, bilateral, indeterminate stage |
| SNOMED CT  | 1654001           | Corticosteroid-induced open angle glaucoma                            |
| SNOMED CT  | 15374009          | Aphakic glaucoma                                                      |
| SNOMED CT  | 19144002          | Absolute glaucoma                                                     |
| SNOMED CT  | 19309007          | Glaucoma associated with vascular disorder                            |
| SNOMED CT  | 21571006          | Secondary angle-closure glaucoma                                      |
| SNOMED CT  | 21928008          | Secondary open-angle glaucoma                                         |
| SNOMED CT  | 23986001          | Glaucoma                                                              |
| SNOMED CT  | 27735002          | Glaucoma associated with tumors AND/OR cysts                          |
| SNOMED CT  | 29369005          | Hypersecretion glaucoma                                               |
| SNOMED CT  | 30041005          | Acute angle-closure glaucoma                                          |
| SNOMED CT  | 32893002          | Phacolytic glaucoma                                                   |
| SNOMED CT  | 33647009          | Chronic angle-closure glaucoma                                        |
| SNOMED CT  | 34623005          | Glaucoma with increased episcleral venous pressure                    |
| SNOMED CT  | 787051000         | Open-angle glaucoma of left eye                                       |
| SNOMED CT  | 787052007         | Open-angle glaucoma of right eye                                      |
| SNOMED CT  | 24151000119106    | Steroid-induced open angle glaucoma                                   |
| SNOMED CT  | 41911000119107    | Glaucoma due to type 2 diabetes mellitus                              |
| SNOMED CT  | 60981000119103    | Glaucoma due to diabetes mellitus type 1                              |
| SNOMED CT  | 336611000119109   | Acute angle-closure glaucoma of right eye                             |
| SNOMED CT  | 336631000119104   | Absolute glaucoma right eye                                           |
| SNOMED CT  | 342221000119104   | Acute angle-closure glaucoma of left eye                              |
| SNOMED CT  | 342241000119105   | Absolute glaucoma left eye                                            |
| SNOMED CT  | 347381000119106   | Bilateral acute angle-closure glaucoma                                |
| SNOMED CT  | 347401000119106   | Bilateral absolute glaucoma                                           |
| SNOMED CT  | 12239301000119102 | Bilateral open-angle glaucoma                                         |
| SNOMED CT  | 12239421000119101 | Bilateral glaucoma                                                    |
| SNOMED CT  | 12239461000119106 | Glaucoma of left eye                                                  |
| SNOMED CT  | 12239501000119106 | Glaucoma of right eye                                                 |
| SNOMED CT  | 15633281000119103 | Bilateral primary open angle glaucoma                                 |
| SNOMED CT  | 15633321000119108 | Primary open angle glaucoma of left eye                               |
| SNOMED CT  | 15640441000119104 | Primary open angle glaucoma of right eye                              |
| SNOMED CT  | 15673001000119103 | Congenital glaucoma of bilateral eyes                                 |
| SNOMED CT  | 15679801000119105 | Bilateral uveitis-glaucoma-hyphema syndrome of eyes                   |
| SNOMED CT  | 15736441000119108 | Primary angle-closure glaucoma of bilateral eyes                      |
| SNOMED CT  | 15736481000119103 | Primary angle-closure glaucoma of right eye                           |
| SNOMED CT  | 15736521000119103 | Primary angle-closure glaucoma of left eye                            |
| SNOMED CT  | 15736561000119108 | Neovascular glaucoma of bilateral eyes                                |
| SNOMED CT  | 15736601000119108 | Neovascular glaucoma of right eye                                     |
| SNOMED CT  | 15736641000119105 | Neovascular glaucoma of left eye                                      |
| SNOMED CT  | 15736681000119100 | Narrow-angle glaucoma of right eye                                    |
| SNOMED CT  | 15736721000119106 | Bilateral angle-closure glaucoma                                      |

Continued on next page

**Table9 – continued from previous page**

| CodeSystem | ConceptCode       | ConceptName                                                 |
|------------|-------------------|-------------------------------------------------------------|
| SNOMED CT  | 15736761000119101 | Narrow angle glaucoma of left eye                           |
| SNOMED CT  | 15738841000119105 | Glaucoma of bilateral eyes due to combination of mechanisms |
| SNOMED CT  | 15738881000119100 | Glaucoma of left eye due to combination of mechanisms       |
| SNOMED CT  | 15738921000119107 | Glaucoma of right eye due to combination of mechanisms      |
| SNOMED CT  | 15739041000119106 | Glaucoma of bilateral eyes due to iris anomaly              |
| SNOMED CT  | 15739081000119101 | Glaucoma of bilateral eyes due to anterior segment anomaly  |
| SNOMED CT  | 15739121000119104 | Glaucoma of right eye due to anterior segment anomaly       |
| SNOMED CT  | 15739161000119109 | Glaucoma of left eye due to anterior segment anomaly        |
| SNOMED CT  | 15739201000119104 | Glaucoma of left eye due to ocular vascular disorder        |
| SNOMED CT  | 15739241000119102 | Glaucoma of right eye due to ocular vascular disorder       |
| SNOMED CT  | 15739281000119107 | Glaucoma of bilateral eyes due to ocular vascular disorder  |
| SNOMED CT  | 15739321000119102 | Glaucoma of right eye due to chamber angle anomaly          |
| SNOMED CT  | 15739361000119107 | Glaucoma of bilateral eyes due to chamber angle anomaly     |
| SNOMED CT  | 15739401000119103 | Glaucoma of left eye due to chamber angle anomaly           |
| SNOMED CT  | 15739441000119101 | Glaucoma of right eye due to trauma                         |
| SNOMED CT  | 15739481000119106 | Glaucoma of left eye due to trauma                          |
| SNOMED CT  | 15739561000119101 | Glaucoma of right eye due to lens disorder                  |
| SNOMED CT  | 15739641000119104 | Glaucoma of left eye due to lens disorder                   |
| SNOMED CT  | 15739681000119109 | Glaucoma of right eye due to systemic disorder              |
| SNOMED CT  | 15739721000119103 | Glaucoma of left eye due to systemic disorder               |
| SNOMED CT  | 15739761000119108 | Glaucoma of bilateral eyes due to systemic disorder         |
| SNOMED CT  | 15993671000119108 | Open-angle glaucoma of right eye caused by steroid          |
| SNOMED CT  | 15993711000119107 | Open-angle glaucoma of left eye caused by steroid           |
| SNOMED CT  | 15993751000119108 | Open-angle glaucoma of bilateral eyes caused by steroid     |
| SNOMED CT  | 15996831000119101 | Glaucoma caused by Onchocerca volvulus                      |
| SNOMED CT  | 193548006         | Steroid-induced glaucoma glaucomatous stage                 |
| SNOMED CT  | 193552006         | Glaucoma due to chamber angle anomaly                       |
| SNOMED CT  | 193553001         | Glaucoma due to iris anomaly                                |
| SNOMED CT  | 193555008         | Glaucoma due to systemic syndrome                           |
| SNOMED CT  | 193561006         | Secondary angle-closure glaucoma with pupillary block       |
| SNOMED CT  | 193562004         | Glaucoma due to ocular vascular disorder                    |
| SNOMED CT  | 204113001         | Congenital glaucoma                                         |
| SNOMED CT  | 206248004         | Traumatic glaucoma due to birth trauma                      |
| SNOMED CT  | 232081005         | Iatrogenic glaucoma                                         |
| SNOMED CT  | 232082003         | Iatrogenic angle-closure glaucoma                           |
| SNOMED CT  | 232083008         | Glaucoma and corneal anomaly                                |
| SNOMED CT  | 232086000         | Neovascular glaucoma                                        |
| SNOMED CT  | 232087009         | Glaucoma with intraocular hemorrhage                        |
| SNOMED CT  | 232088004         | Ghost cell glaucoma                                         |
| SNOMED CT  | 232090003         | Glaucoma following surgery                                  |
| SNOMED CT  | 314017009         | Acute-on-chronic glaucoma                                   |
| SNOMED CT  | 314033007         | Uveitic glaucoma                                            |

Continued on next page

**Table9 – continued from previous page**

| CodeSystem | ConceptCode | ConceptName                                                           |
|------------|-------------|-----------------------------------------------------------------------|
| SNOMED CT  | 314784002   | Secondary angle-closure glaucoma - synechial                          |
| SNOMED CT  | 370504007   | Aqueous humor misdirect                                               |
| SNOMED CT  | 392030001   | Hemolytic glaucoma                                                    |
| SNOMED CT  | 392288006   | Primary angle-closure glaucoma                                        |
| SNOMED CT  | 392291006   | Angle-closure glaucoma                                                |
| SNOMED CT  | 392300000   | Phacomorphic glaucoma                                                 |
| SNOMED CT  | 392352004   | Angle recession glaucoma                                              |
| SNOMED CT  | 404648005   | Lens particle glaucoma                                                |
| SNOMED CT  | 415176004   | Primary congenital glaucoma                                           |
| SNOMED CT  | 37155002    | Glaucoma associated with ocular inflammation                          |
| SNOMED CT  | 45623002    | Glaucoma associated with anterior segment anomaly                     |
| SNOMED CT  | 46168003    | Pigmentary glaucoma                                                   |
| SNOMED CT  | 50485007    | Low tension glaucoma                                                  |
| SNOMED CT  | 53667005    | Glaucoma associated with systemic syndromes                           |
| SNOMED CT  | 65460003    | Intermittent angle-closure glaucoma                                   |
| SNOMED CT  | 66725002    | Glaucoma due to perforating injury                                    |
| SNOMED CT  | 66747002    | Glaucoma associated with ocular disorder                              |
| SNOMED CT  | 68241007    | Glaucoma associated with ocular trauma                                |
| SNOMED CT  | 77075001    | Primary open angle glaucoma                                           |
| SNOMED CT  | 444863008   | Anatomical narrow angle glaucoma with borderline intraocular pressure |
| SNOMED CT  | 698840003   | Neovascular glaucoma due to hyphema                                   |
| SNOMED CT  | 713457002   | Neovascular glaucoma due to diabetes mellitus                         |
| SNOMED CT  | 715144004   | Glaucoma caused by silicone oil                                       |
| SNOMED CT  | 716166002   | Microcornea with glaucoma and absent frontal sinus syndrome           |
| SNOMED CT  | 721898008   | Open angle glaucoma of bilateral eyes caused by corticosteroid        |
| SNOMED CT  | 722321001   | Open angle glaucoma of left eye caused by corticosteroid              |
| SNOMED CT  | 722329004   | Open angle glaucoma of right eye caused by corticosteroid             |
| SNOMED CT  | 267625001   | Glaucoma due to ocular tumor or cyst                                  |
| SNOMED CT  | 275477002   | Glaucoma due to ocular cyst                                           |
| SNOMED CT  | 84333006    | Phacogenic glaucoma                                                   |
| SNOMED CT  | 84494001    | Open-angle glaucoma                                                   |
| SNOMED CT  | 89215000    | Postoperative angle-closure glaucoma                                  |
| SNOMED CT  | 92829008    | Glaucoma due to combination of mechanisms                             |
| SNOMED CT  | 95213001    | Primary glaucoma due to combination of mechanisms                     |
| SNOMED CT  | 95250000    | Secondary glaucoma due to combination mechanisms                      |
| SNOMED CT  | 95717004    | Secondary glaucoma                                                    |
| SNOMED CT  | 111513000   | Advanced open-angle glaucoma                                          |
| SNOMED CT  | 111514006   | Pseudoexfoliation glaucoma                                            |
| SNOMED CT  | 1207009     | Glaucomatous atrophy of optic disc                                    |
| SNOMED CT  | 29538005    | Glaucomatocyclitic crisis                                             |

Continued on next page



**Table9 – continued from previous page**

| CodeSystem | ConceptCode     | ConceptName                                                         |
|------------|-----------------|---------------------------------------------------------------------|
| SNOMED CT  | 35472004        | Open angle with borderline intraocular pressure                     |
| SNOMED CT  | 1231271005      | Glaucoma due to and following retinopathy of prematurity            |
| SNOMED CT  | 1231270006      | Glaucoma following ocular onchocerciasis                            |
| SNOMED CT  | 334961000119105 | Right secondary angle-closure glaucoma due to pupil block           |
| SNOMED CT  | 349231000119108 | Bilateral aqueous humor misdirection of eyes                        |
| SNOMED CT  | 1231243004      | High pressure primary open-angle glaucoma                           |
| SNOMED CT  | 733086003       | Pseudoprogeria syndrome                                             |
| SNOMED CT  | 733116005       | Aniridia, renal agenesis, psychomotor retardation syndrome          |
| SNOMED CT  | 733455003       | Spastic paraplegia, glaucoma, intellectual disability syndrome      |
| SNOMED CT  | 736838001       | Cupping of optic disc due to open angle glaucoma                    |
| SNOMED CT  | 737006004       | Cupping of optic discs of bilateral eyes due to open-angle glaucoma |
| SNOMED CT  | 770776002       | Borderline angle-closure glaucoma of right eye                      |
| SNOMED CT  | 770777006       | Borderline angle-closure glaucoma of left eye                       |
| SNOMED CT  | 783246000       | Megalocornea, spherophakia, secondary glaucoma syndrome             |
| SNOMED CT  | 788945006       | Glaucoma caused by contact lens                                     |
| SNOMED CT  | 788946007       | Glaucoma due to eye inflammation                                    |
| SNOMED CT  | 788947003       | Glaucoma due to intraocular neoplasm                                |
| SNOMED CT  | 788948008       | Glaucoma due to retinal detachment                                  |
| SNOMED CT  | 788995007       | Normal pressure primary open-angle glaucoma                         |
| SNOMED CT  | 833278008       | Glaucoma suspect                                                    |
| SNOMED CT  | 860798008       | Glaucoma due to diabetes mellitus                                   |
| SNOMED CT  | 331471000119105 | Uveitic glaucoma of right eye                                       |
| SNOMED CT  | 332871000119103 | Pseudoexfoliation glaucoma of right eye                             |
| SNOMED CT  | 333111000119107 | Pigmentary glaucoma of right eye                                    |
| SNOMED CT  | 333151000119108 | Phacolytic glaucoma of right eye                                    |
| SNOMED CT  | 334321000119101 | Low tension glaucoma of right eye                                   |
| SNOMED CT  | 336031000119105 | Anatomic narrow angle glaucoma of right eye                         |
| SNOMED CT  | 337081000119109 | Uveitic glaucoma of left eye                                        |
| SNOMED CT  | 338481000119100 | Pseudoexfoliation glaucoma of left eye                              |
| SNOMED CT  | 338721000119108 | Pigmentary glaucoma of left eye                                     |
| SNOMED CT  | 338761000119103 | Phacolytic glaucoma of left eye                                     |
| SNOMED CT  | 339921000119104 | Low tension glaucoma of left eye                                    |
| SNOMED CT  | 341641000119100 | Anatomic narrow angle glaucoma of left eye                          |
| SNOMED CT  | 343161000119109 | Bilateral uveitic glaucoma of eyes                                  |
| SNOMED CT  | 344251000119103 | Bilateral pseudoexfoliation glaucoma of eyes                        |
| SNOMED CT  | 344491000119107 | Bilateral pigmentary glaucoma of eyes                               |
| SNOMED CT  | 345291000119109 | Bilateral low tension glaucoma of eyes                              |
| SNOMED CT  | 346861000119107 | Bilateral eye anatomic narrow angle glaucoma                        |
| SNOMED CT  | 348361000119103 | Aphakic glaucoma of right eye                                       |
| SNOMED CT  | 348811000119108 | Aphakic glaucoma of left eye                                        |

Continued on next page

**Table9 – continued from previous page**

| CodeSystem | ConceptCode       | ConceptName                                                            |
|------------|-------------------|------------------------------------------------------------------------|
| SNOMED CT  | 349311000119106   | Bilateral aphakic glaucoma                                             |
| SNOMED CT  | 678401000119102   | Bilateral glaucoma of eyes caused by drug                              |
| SNOMED CT  | 678411000119104   | Glaucoma of left eye caused by drug                                    |
| SNOMED CT  | 678421000119106   | Glaucoma of right eye caused by drug                                   |
| SNOMED CT  | 678471000119107   | Aqueous humor misdirection of left eye                                 |
| SNOMED CT  | 678481000119105   | Aqueous humor misdirection of right eye                                |
| SNOMED CT  | 15673041000119101 | Congenital glaucoma of right eye                                       |
| SNOMED CT  | 15673081000119106 | Congenital glaucoma of left eye                                        |
| SNOMED CT  | 15679721000119107 | Uveitis-hyphema-glaucoma syndrome of right eye                         |
| SNOMED CT  | 15679761000119102 | Uveitis-hyphema-glaucoma syndrome of left eye                          |
| SNOMED CT  | 15738761000119100 | Bilateral eye borderline angle-closure glaucoma                        |
| SNOMED CT  | 15739801000119100 | Cupping of left optic disc due to open-angle glaucoma of left eye      |
| SNOMED CT  | 15739881000119108 | Cupping of right optic disc due to open-angle glaucoma of right eye    |
| SNOMED CT  | 193531003         | Borderline glaucoma                                                    |
| SNOMED CT  | 193533000         | Open-angle glaucoma - borderline                                       |
| SNOMED CT  | 193534006         | Angle-closure glaucoma - borderline                                    |
| SNOMED CT  | 193556009         | Glaucoma in endocrine, nutritional and metabolic diseases              |
| SNOMED CT  | 232080006         | Plateau iris                                                           |
| SNOMED CT  | 1285643003        | Neovascular glaucoma due to central retinal vein occlusion             |
| SNOMED CT  | 392029006         | Uveitis-glaucoma-hyphema syndrome                                      |
| SNOMED CT  | 404634005         | Glaucoma associated with iridocorneal endothelial syndrome             |
| SNOMED CT  | 415501002         | Schwartz ocular syndrome                                               |
| SNOMED CT  | 71111008          | Glaucoma of childhood                                                  |
| SNOMED CT  | 718851007         | Cataract glaucoma syndrome                                             |
| SNOMED CT  | 719976001         | Glaucoma and sleep apnea syndrome                                      |
| SNOMED CT  | 721974000         | Lowry MacLean syndrome                                                 |
| SNOMED CT  | 722450007         | GEMSS syndrome                                                         |
| SNOMED CT  | 723503006         | Retinal degeneration, nanophthalmos, glaucoma syndrome                 |
| SNOMED CT  | 302895007         | Steroid-induced glaucoma - borderline                                  |
| SNOMED CT  | 340571000119101   | Left secondary angle-closure glaucoma due to pupil block               |
| SNOMED CT  | 1196923000        | Neovascular glaucoma due to diabetes mellitus type 1                   |
| SNOMED CT  | 1003425007        | Glaucoma due to Lowe syndrome                                          |
| SNOMED CT  | 1003428009        | Glaucoma due to congenital anomaly of eye                              |
| SNOMED CT  | 1003657004        | Congenital glaucoma of left eye                                        |
| SNOMED CT  | 15995551000119104 | Bilateral glaucoma of eyes due to plateau iris                         |
| SNOMED CT  | 334761000119107   | Intermittent angle-closure glaucoma of right eye                       |
| SNOMED CT  | 340361000119101   | Intermittent angle-closure glaucoma of left eye                        |
| SNOMED CT  | 345701000119106   | Bilateral intermittent angle-closure glaucoma                          |
| SNOMED CT  | 678431000119109   | Bilateral glaucoma of eyes due to increased episcleral venous pressure |

Continued on next page

**Table9 – continued from previous page**

| CodeSystem | ConceptCode     | ConceptName                                                               |
|------------|-----------------|---------------------------------------------------------------------------|
| SNOMED CT  | 678441000119100 | Glaucoma of left eye due to increased episcleral venous pressure          |
| SNOMED CT  | 678451000119103 | Glaucoma of right eye due to increased episcleral venous pressure         |
| SNOMED CT  | 890423003       | Secondary childhood glaucoma following congenital cataract surgery        |
| SNOMED CT  | 897585008       | Bilateral primary congenital glaucoma                                     |
| SNOMED CT  | 1137633000      | Secondary angle-closure glaucoma due to iridocorneal endothelial syndrome |
| SNOMED CT  | 345881000119107 | Bilateral secondary angle-closure glaucoma due to pupil block             |
| SNOMED CT  | 93435005        | Drug-induced glaucoma                                                     |
| SNOMED CT  | 1196922005      | Neovascular glaucoma due to diabetes mellitus type 2                      |

### 1.4.7 Heart Failure

Table 10: Concept codes used to identify heart failure conditions.

| CodeSystem | ConceptCode | ConceptName                                                                                                                                                |
|------------|-------------|------------------------------------------------------------------------------------------------------------------------------------------------------------|
| ICD10CM    | I11.0       | Hypertensive heart disease with heart failure                                                                                                              |
| ICD10CM    | I13.0       | Hypertensive heart and chronic kidney disease with heart failure and stage 1 through stage 4 chronic kidney disease, or unspecified chronic kidney disease |
| ICD10CM    | I13.2       | Hypertensive heart and chronic kidney disease with heart failure and with stage 5 chronic kidney disease, or end stage renal disease                       |
| ICD10CM    | I50.1       | Left ventricular failure, unspecified                                                                                                                      |
| ICD10CM    | I50.20      | Unspecified systolic (congestive) heart failure                                                                                                            |
| ICD10CM    | I50.21      | Acute systolic (congestive) heart failure                                                                                                                  |
| ICD10CM    | I50.22      | Chronic systolic (congestive) heart failure                                                                                                                |
| ICD10CM    | I50.23      | Acute on chronic systolic (congestive) heart failure                                                                                                       |
| ICD10CM    | I50.30      | Unspecified diastolic (congestive) heart failure                                                                                                           |
| ICD10CM    | I50.31      | Acute diastolic (congestive) heart failure                                                                                                                 |
| ICD10CM    | I50.32      | Chronic diastolic (congestive) heart failure                                                                                                               |
| ICD10CM    | I50.33      | Acute on chronic diastolic (congestive) heart failure                                                                                                      |
| ICD10CM    | I50.40      | Unspecified combined systolic (congestive) and diastolic (congestive) heart failure                                                                        |
| ICD10CM    | I50.41      | Acute combined systolic (congestive) and diastolic (congestive) heart failure                                                                              |
| ICD10CM    | I50.42      | Chronic combined systolic (congestive) and diastolic (congestive) heart failure                                                                            |

Continued on next page

**Table10 – continued from previous page**

| CodeSystem | ConceptCode       | ConceptName                                                                              |
|------------|-------------------|------------------------------------------------------------------------------------------|
| ICD10CM    | I50.43            | Acute on chronic combined systolic (congestive) and diastolic (congestive) heart failure |
| ICD10CM    | I50.81            | Right heart failure                                                                      |
| ICD10CM    | I50.82            | Biventricular heart failure                                                              |
| ICD10CM    | I50.83            | High output heart failure                                                                |
| ICD10CM    | I50.84            | End stage heart failure                                                                  |
| ICD10CM    | I50.89            | Other heart failure                                                                      |
| ICD10CM    | I50.9             | Heart failure, unspecified                                                               |
| ICD10CM    | I50.810           | Right heart failure, unspecified                                                         |
| ICD10CM    | I50.811           | Acute right heart failure                                                                |
| ICD10CM    | I50.812           | Chronic right heart failure                                                              |
| ICD10CM    | I50.813           | Acute on chronic right heart failure                                                     |
| ICD10CM    | I50.814           | Right heart failure due to left heart failure                                            |
| SNOMED CT  | 364006            | Acute left-sided heart failure                                                           |
| SNOMED CT  | 5148006           | Hypertensive heart disease with congestive heart failure                                 |
| SNOMED CT  | 5375005           | Chronic left-sided congestive heart failure                                              |
| SNOMED CT  | 10091002          | High output heart failure                                                                |
| SNOMED CT  | 10633002          | Acute congestive heart failure                                                           |
| SNOMED CT  | 25544003          | Low output heart failure                                                                 |
| SNOMED CT  | 871617000         | Low output heart failure due to and following Fontan operation                           |
| SNOMED CT  | 7411000175102     | Chronic heart failure co-occurrent with normal ejection fraction                         |
| SNOMED CT  | 15781000119107    | Hypertensive heart AND chronic kidney disease with congestive heart failure              |
| SNOMED CT  | 23341000119109    | Congestive heart failure with right heart failure                                        |
| SNOMED CT  | 67431000119105    | Congestive heart failure stage D                                                         |
| SNOMED CT  | 67441000119101    | Congestive heart failure stage C                                                         |
| SNOMED CT  | 72481000119103    | Congestive heart failure as early postoperative complication                             |
| SNOMED CT  | 101281000119107   | Congestive heart failure due to cardiomyopathy                                           |
| SNOMED CT  | 120851000119104   | Systolic heart failure stage D                                                           |
| SNOMED CT  | 120861000119102   | Systolic heart failure stage C                                                           |
| SNOMED CT  | 120871000119108   | Systolic heart failure stage B                                                           |
| SNOMED CT  | 120881000119106   | Diastolic heart failure stage D                                                          |
| SNOMED CT  | 120891000119109   | Diastolic heart failure stage C                                                          |
| SNOMED CT  | 120901000119108   | Diastolic heart failure stage B                                                          |
| SNOMED CT  | 153931000119109   | Acute combined systolic and diastolic heart failure                                      |
| SNOMED CT  | 153941000119100   | Chronic combined systolic and diastolic heart failure                                    |
| SNOMED CT  | 153951000119103   | Acute on chronic combined systolic and diastolic heart failure                           |
| SNOMED CT  | 15629541000119106 | Congestive heart failure stage C due to ischemic cardiomyopathy                          |

Continued on next page

**Table10 – continued from previous page**

| CodeSystem | ConceptCode       | ConceptName                                                                                 |
|------------|-------------------|---------------------------------------------------------------------------------------------|
| SNOMED CT  | 15629591000119103 | Congestive heart failure stage B due to ischaemic cardiomyopathy                            |
| SNOMED CT  | 15629641000119107 | Systolic heart failure stage B due to ischemic cardiomyopathy                               |
| SNOMED CT  | 15629741000119102 | Systolic heart failure stage C due to ischemic cardiomyopathy                               |
| SNOMED CT  | 15964701000119109 | Saddle embolus of pulmonary artery with acute cor pulmonale                                 |
| SNOMED CT  | 194767001         | Benign hypertensive heart disease with congestive cardiac failure                           |
| SNOMED CT  | 194779001         | Hypertensive heart and renal disease with (congestive) heart failure                        |
| SNOMED CT  | 194781004         | Hypertensive heart and renal disease with both (congestive) heart failure and renal failure |
| SNOMED CT  | 195111005         | Decompensated cardiac failure                                                               |
| SNOMED CT  | 195112003         | Compensated cardiac failure                                                                 |
| SNOMED CT  | 195114002         | Acute left ventricular failure                                                              |
| SNOMED CT  | 206586007         | Congenital cardiac failure                                                                  |
| SNOMED CT  | 233924009         | Heart failure as a complication of care                                                     |
| SNOMED CT  | 314206003         | Refractory heart failure                                                                    |
| SNOMED CT  | 410431009         | Cardiorespiratory failure                                                                   |
| SNOMED CT  | 417996009         | Systolic heart failure                                                                      |
| SNOMED CT  | 418304008         | Diastolic heart failure                                                                     |
| SNOMED CT  | 424404003         | Decompensated chronic heart failure                                                         |
| SNOMED CT  | 426263006         | Congestive heart failure due to left ventricular systolic dysfunction                       |
| SNOMED CT  | 426611007         | Congestive heart failure due to valvular disease                                            |
| SNOMED CT  | 42343007          | Congestive heart failure                                                                    |
| SNOMED CT  | 43736008          | Rheumatic left ventricular failure                                                          |
| SNOMED CT  | 44088000          | Low cardiac output syndrome                                                                 |
| SNOMED CT  | 44313006          | Right heart failure secondary to left heart failure                                         |
| SNOMED CT  | 46113002          | Hypertensive heart failure                                                                  |
| SNOMED CT  | 48447003          | Chronic heart failure                                                                       |
| SNOMED CT  | 56675007          | Acute heart failure                                                                         |
| SNOMED CT  | 74960003          | Acute left-sided congestive heart failure                                                   |
| SNOMED CT  | 82523003          | Congestive rheumatic heart failure                                                          |
| SNOMED CT  | 441481004         | Chronic systolic heart failure                                                              |
| SNOMED CT  | 441530006         | Chronic diastolic heart failure                                                             |
| SNOMED CT  | 443253003         | Acute on chronic systolic heart failure                                                     |
| SNOMED CT  | 443254009         | Acute systolic heart failure                                                                |
| SNOMED CT  | 443343001         | Acute diastolic heart failure                                                               |
| SNOMED CT  | 443344007         | Acute on chronic diastolic heart failure                                                    |
| SNOMED CT  | 446221000         | Heart failure with normal ejection fraction                                                 |

Continued on next page

**Table10 – continued from previous page**

| CodeSystem | ConceptCode | ConceptName                                                                           |
|------------|-------------|---------------------------------------------------------------------------------------|
| SNOMED CT  | 471880001   | Heart failure due to end stage congenital heart disease                               |
| SNOMED CT  | 698296002   | Acute exacerbation of chronic congestive heart failure                                |
| SNOMED CT  | 698594003   | Symptomatic congestive heart failure                                                  |
| SNOMED CT  | 703272007   | Heart failure with reduced ejection fraction                                          |
| SNOMED CT  | 703273002   | Heart failure with reduced ejection fraction due to coronary artery disease           |
| SNOMED CT  | 703274008   | Heart failure with reduced ejection fraction due to myocarditis                       |
| SNOMED CT  | 703275009   | Heart failure with reduced ejection fraction due to cardiomyopathy                    |
| SNOMED CT  | 703276005   | Heart failure with reduced ejection fraction due to heart valve disease               |
| SNOMED CT  | 717840005   | Congestive heart failure stage B                                                      |
| SNOMED CT  | 83105008    | Malignant hypertensive heart disease with congestive heart failure                    |
| SNOMED CT  | 84114007    | Heart failure                                                                         |
| SNOMED CT  | 85232009    | Left heart failure                                                                    |
| SNOMED CT  | 88805009    | Chronic congestive heart failure                                                      |
| SNOMED CT  | 90727007    | Pleural effusion due to congestive heart failure                                      |
| SNOMED CT  | 92506005    | Biventricular congestive heart failure                                                |
| SNOMED CT  | 111283005   | Chronic left-sided heart failure                                                      |
| SNOMED CT  | 1204460007  | Myocardial dysfunction with sepsis                                                    |
| SNOMED CT  | 5053004     | Cardiac insufficiency due to prosthesis                                               |
| SNOMED CT  | 10335000    | Chronic right-sided heart failure                                                     |
| SNOMED CT  | 16253001    | Dilated peripartum cardiomyopathy                                                     |
| SNOMED CT  | 24841007    | Cardiorespiratory failure during AND/OR resulting from a procedure                    |
| SNOMED CT  | 33644002    | Postvalvulotomy syndrome                                                              |
| SNOMED CT  | 1204206001  | Left ventricular failure with normal ejection fraction due to cardiomyopathy          |
| SNOMED CT  | 1204203009  | Left ventricular failure with normal ejection fraction due to coronary artery disease |
| SNOMED CT  | 1204204003  | Left ventricular failure with normal ejection fraction due to myocarditis             |
| SNOMED CT  | 1204200007  | Left ventricular failure with normal ejection fraction due to valvular heart disease  |
| SNOMED CT  | 1204462004  | Left ventricular failure with sepsis                                                  |
| SNOMED CT  | 1208846006  | Right ventricular failure due to pulmonary disease                                    |
| SNOMED CT  | 1208848007  | Right ventricular failure due to pulmonary vascular disease                           |
| SNOMED CT  | 1208850004  | Right ventricular failure due to right ventricular infarction                         |
| SNOMED CT  | 1208843003  | Right ventricular failure due to valvular heart disease                               |
| SNOMED CT  | 1204468000  | Right ventricular failure with sepsis                                                 |
| SNOMED CT  | 788950000   | Heart failure with mid range ejection fraction                                        |

Continued on next page

**Table10 – continued from previous page**

| CodeSystem | ConceptCode       | ConceptName                                                                         |
|------------|-------------------|-------------------------------------------------------------------------------------|
| SNOMED CT  | 7371000175103     | Reduced ejection fraction co-occurrent and due to acute on chronic heart failure    |
| SNOMED CT  | 7381000175100     | Reduced ejection fraction co-occurrent and due to chronic heart failure             |
| SNOMED CT  | 7391000175102     | Reduced ejection fraction co-occurrent and due to acute heart failure               |
| SNOMED CT  | 7401000175100     | Acute on chronic heart failure co-occurrent with normal ejection fraction           |
| SNOMED CT  | 7421000175106     | Acute heart failure co-occurrent with normal ejection fraction                      |
| SNOMED CT  | 96311000119109    | Exacerbation of congestive heart failure                                            |
| SNOMED CT  | 285211000119102   | Congestive heart failure as post-operative complication of cardiac surgery          |
| SNOMED CT  | 285221000119109   | Congestive heart failure as post-operative complication of non-cardiac surgery      |
| SNOMED CT  | 16838951000119100 | Acute on chronic right-sided congestive heart failure                               |
| SNOMED CT  | 13839000          | Right ventricular obstruction - failure syndrome                                    |
| SNOMED CT  | 78862003          | Cardiopathia nigra                                                                  |
| SNOMED CT  | 1264003007        | Postcardiotomy acute right ventricular failure                                      |
| SNOMED CT  | 359617009         | Acute right-sided heart failure                                                     |
| SNOMED CT  | 367363000         | Right ventricular failure                                                           |
| SNOMED CT  | 426012001         | Right heart failure due to pulmonary hypertension                                   |
| SNOMED CT  | 45650007          | Kyphoscoliotic heart disease                                                        |
| SNOMED CT  | 49584005          | Acute cor pulmonale                                                                 |
| SNOMED CT  | 55565007          | Cardiac failure after obstetrical surgery AND/OR other procedure including delivery |
| SNOMED CT  | 60856006          | Cardiac insufficiency following cardiac surgery                                     |
| SNOMED CT  | 62377009          | Peripartum cardiomyopathy in puerperium                                             |
| SNOMED CT  | 66989003          | Chronic right-sided congestive heart failure                                        |
| SNOMED CT  | 71892000          | Cardiac asthma                                                                      |
| SNOMED CT  | 79955004          | Chronic cardiopulmonary disease                                                     |
| SNOMED CT  | 80479009          | Acute right-sided congestive heart failure                                          |
| SNOMED CT  | 445236007         | Cardiorenal syndrome                                                                |
| SNOMED CT  | 462172006         | Fetal heart failure                                                                 |
| SNOMED CT  | 462174007         | Fetal heart failure with myocardial hypertrophy                                     |
| SNOMED CT  | 462175008         | Fetal heart failure with redistribution of cardiac output                           |
| SNOMED CT  | 609507007         | Induced termination of pregnancy complicated by cardiac failure                     |
| SNOMED CT  | 704242009         | Fetal heart failure due to extracardiac disease                                     |
| SNOMED CT  | 722095005         | Acute kidney injury due to circulatory failure                                      |
| SNOMED CT  | 722919003         | Neonatal cardiac failure due to decreased left ventricular output                   |
| SNOMED CT  | 724550005         | Neonatal cardiac failure due to pulmonary overperfusion                             |

Continued on next page

**Table10 – continued from previous page**

| CodeSystem | ConceptCode       | ConceptName                                                    |
|------------|-------------------|----------------------------------------------------------------|
| SNOMED CT  | 276514007         | Neonatal cardiac failure                                       |
| SNOMED CT  | 277638005         | Sepsis-associated left ventricular failure                     |
| SNOMED CT  | 277639002         | Sepsis-associated right ventricular failure                    |
| SNOMED CT  | 1010444007        | Legal abortion complicated by cardiac failure                  |
| SNOMED CT  | 1010447000        | Illegal abortion complicated by cardiac failure                |
| SNOMED CT  | 15964661000119102 | Acute cor pulmonale due to septic pulmonary embolism           |
| SNOMED CT  | 898208007         | Heart failure due to thyrotoxicosis                            |
| SNOMED CT  | 83291003          | Right heart failure due to pulmonary hypertension              |
| SNOMED CT  | 89819002          | Cardiac insufficiency during AND/OR resulting from a procedure |

### 1.4.8 Hyperlipidemia

Table 11: Concept codes used to identify hyperlipidemia conditions.

| CodeSystem | ConceptCode     | ConceptName                                                           |
|------------|-----------------|-----------------------------------------------------------------------|
| ICD10CM    | E78.0           | Pure hypercholesterolemia                                             |
| ICD10CM    | E78.00          | Pure hypercholesterolemia, unspecified                                |
| ICD10CM    | E78.01          | Familial hypercholesterolemia                                         |
| ICD10CM    | E78.1           | Pure hyperglyceridemia                                                |
| ICD10CM    | E78.2           | Mixed hyperlipidemia                                                  |
| ICD10CM    | E78.3           | Hyperchylomicronemia                                                  |
| ICD10CM    | E78.4           | Other hyperlipidemia                                                  |
| ICD10CM    | E78.41          | Elevated Lipoprotein(a)                                               |
| ICD10CM    | E78.49          | Other hyperlipidemia                                                  |
| ICD10CM    | E78.5           | Hyperlipidemia, unspecified                                           |
| SNOMED CT  | 13644009        | Hypercholesterolemia                                                  |
| SNOMED CT  | 33513003        | Familial apoC-II deficiency                                           |
| SNOMED CT  | 34349009        | Familial type 5 hyperlipoproteinemia                                  |
| SNOMED CT  | 34528009        | Familial hypertriglyceridemia                                         |
| SNOMED CT  | 773649005       | Transient infantile hypertriglyceridemia and hepatosteatosis          |
| SNOMED CT  | 773726000       | Hypercholesterolemia due to cholesterol 7alpha-hydroxylase deficiency |
| SNOMED CT  | 701000119103    | Mixed hyperlipidemia due to type 2 diabetes mellitus                  |
| SNOMED CT  | 1571000119104   | Mixed hyperlipidemia due to type 1 diabetes mellitus                  |
| SNOMED CT  | 15771000119109  | Familial hyperalphalipoproteinemia                                    |
| SNOMED CT  | 114831000119107 | Hyperlipidemia caused by steroid                                      |
| SNOMED CT  | 137931000119102 | Hyperlipidemia due to type 2 diabetes mellitus                        |
| SNOMED CT  | 137941000119106 | Hyperlipidemia due to type 1 diabetes mellitus                        |

Continued on next page



**Table11 – continued from previous page**

| CodeSystem | ConceptCode | ConceptName                                                                                 |
|------------|-------------|---------------------------------------------------------------------------------------------|
| SNOMED CT  | 403829002   | Familial hypercholesterolemia due to heterozygous low density lipoprotein receptor mutation |
| SNOMED CT  | 403830007   | Familial hypercholesterolemia due to homozygous low density lipoprotein receptor mutation   |
| SNOMED CT  | 767133009   | Compound heterozygous familial hypercholesterolemia                                         |
| SNOMED CT  | 190774002   | Hyperlipidemia, group A                                                                     |
| SNOMED CT  | 238040008   | Familial combined hyperlipidemia                                                            |
| SNOMED CT  | 238076009   | Primary hypercholesterolemia                                                                |
| SNOMED CT  | 238077000   | Polygenic hypercholesterolemia                                                              |
| SNOMED CT  | 238078005   | Familial hypercholesterolemia - homozygous                                                  |
| SNOMED CT  | 238079002   | Familial hypercholesterolemia - heterozygous                                                |
| SNOMED CT  | 238080004   | Hyperalphalipoproteinemia                                                                   |
| SNOMED CT  | 238081000   | Familial defective apolipoprotein B-100                                                     |
| SNOMED CT  | 238082007   | Secondary hypercholesterolemia                                                              |
| SNOMED CT  | 238083002   | Primary hypertriglyceridemia                                                                |
| SNOMED CT  | 238084008   | Very low density lipoproteinemia                                                            |
| SNOMED CT  | 238085009   | Fredrickson type IV hyperlipoproteinemia                                                    |
| SNOMED CT  | 238087001   | Secondary hypertriglyceridemia                                                              |
| SNOMED CT  | 238088006   | Primary combined hyperlipidemia                                                             |
| SNOMED CT  | 238089003   | Secondary combined hyperlipidemia                                                           |
| SNOMED CT  | 397915002   | Fredrickson type IIa hyperlipoproteinemia                                                   |
| SNOMED CT  | 398036000   | Familial hypercholesterolemia                                                               |
| SNOMED CT  | 402473001   | Sporadic primary hypertriglyceridemia                                                       |
| SNOMED CT  | 402474007   | Primary polygenic type IIb combined hyperlipidemia                                          |
| SNOMED CT  | 402475008   | Primary acquired chylomicronemia                                                            |
| SNOMED CT  | 402725005   | Hyperlipidemia with lipid deposition in skin                                                |
| SNOMED CT  | 402726006   | Primary chylomicronemia                                                                     |
| SNOMED CT  | 402727002   | Secondary hyperlipidemia                                                                    |
| SNOMED CT  | 402785008   | Primary genetic hyperlipidemia                                                              |
| SNOMED CT  | 402786009   | Chylomicronemia syndrome                                                                    |
| SNOMED CT  | 402787000   | Primary genetic mixed hyperlipidemia                                                        |
| SNOMED CT  | 403827000   | Familial lipoprotein lipase deficiency with type I phenotype                                |
| SNOMED CT  | 403828005   | Familial lipoprotein lipase deficiency with type V phenotype                                |
| SNOMED CT  | 403831006   | Familial Combined Hypercholesterolaemia                                                     |
| SNOMED CT  | 426161002   | Chemically induced hyperlipidemia                                                           |
| SNOMED CT  | 55822004    | Hyperlipidemia                                                                              |
| SNOMED CT  | 445261005   | Posttransplant hyperlipidemia                                                               |
| SNOMED CT  | 267432004   | Pure hypercholesterolemia                                                                   |
| SNOMED CT  | 267433009   | Pure hyperglyceridemia                                                                      |
| SNOMED CT  | 267434003   | Mixed hyperlipidemia                                                                        |
| SNOMED CT  | 267435002   | Familial hyperchylomicronemia                                                               |
| SNOMED CT  | 299465007   | Familial multiple lipoprotein-type hyperlipidemia                                           |
| SNOMED CT  | 302870006   | Hypertriglyceridemia                                                                        |

Continued on next page

**Table11 – continued from previous page**

| CodeSystem | ConceptCode | ConceptName                                         |
|------------|-------------|-----------------------------------------------------|
| SNOMED CT  | 129589009   | Endogenous hyperlipidemia                           |
| SNOMED CT  | 129590000   | Exogenous hyperlipidemia                            |
| SNOMED CT  | 129591001   | Mixed hypercholesterolemia and hypertriglyceridemia |
| SNOMED CT  | 1197489003  | Familial chylomicronemia syndrome                   |
| SNOMED CT  | 1208738002  | TMEM199 congenital disorder of glycosylation        |
| SNOMED CT  | 275598004   | Familial hyperlipoproteinemia, type I               |

### 1.4.9 Hypertension

Table 12: Concept codes used to identify hypertension conditions.

| CodeSystem | ConceptCode | ConceptName                                                                                                                                                     |
|------------|-------------|-----------------------------------------------------------------------------------------------------------------------------------------------------------------|
| ICD10CM    | I10         | Essential (primary) hypertension                                                                                                                                |
| ICD10CM    | I11.0       | Hypertensive heart disease with heart failure                                                                                                                   |
| ICD10CM    | I11.9       | Hypertensive heart disease without heart failure                                                                                                                |
| ICD10CM    | I12.0       | Hypertensive chronic kidney disease with stage 5 chronic kidney disease or end stage renal disease                                                              |
| ICD10CM    | I12.9       | Hypertensive chronic kidney disease with stage 1 through stage 4 chronic kidney disease, or unspecified chronic kidney disease                                  |
| ICD10CM    | I13.0       | Hypertensive heart and chronic kidney disease with heart failure and stage 1 through stage 4 chronic kidney disease, or unspecified chronic kidney disease      |
| ICD10CM    | I13.1       | Hypertensive heart and chronic kidney disease without heart failure                                                                                             |
| ICD10CM    | I13.10      | Hypertensive heart and chronic kidney disease without heart failure, with stage 1 through stage 4 chronic kidney disease, or unspecified chronic kidney disease |
| ICD10CM    | I13.11      | Hypertensive heart and chronic kidney disease without heart failure, with stage 5 chronic kidney disease, or end stage renal disease                            |
| ICD10CM    | I13.2       | Hypertensive heart and chronic kidney disease with heart failure and with stage 5 chronic kidney disease, or end stage renal disease                            |
| ICD10CM    | I15         | Secondary hypertension                                                                                                                                          |
| ICD10CM    | I15.0       | Renovascular hypertension                                                                                                                                       |
| ICD10CM    | I15.1       | Hypertension secondary to other renal disorders                                                                                                                 |
| ICD10CM    | I15.2       | Hypertension secondary to endocrine disorders                                                                                                                   |
| ICD10CM    | I15.8       | Other secondary hypertension                                                                                                                                    |
| ICD10CM    | I15.9       | Secondary hypertension, unspecified                                                                                                                             |
| ICD10CM    | I16         | Hypertensive crisis                                                                                                                                             |

Continued on next page

**Table12 – continued from previous page**

| CodeSystem | ConceptCode | ConceptName                                                                                                                                              |
|------------|-------------|----------------------------------------------------------------------------------------------------------------------------------------------------------|
| ICD10CM    | I16.0       | Hypertensive urgency                                                                                                                                     |
| ICD10CM    | I16.1       | Hypertensive emergency                                                                                                                                   |
| ICD10CM    | I16.9       | Hypertensive crisis, unspecified                                                                                                                         |
| ICD9CM     | 401.0       | Malignant essential hypertension                                                                                                                         |
| ICD9CM     | 401.1       | Benign essential hypertension                                                                                                                            |
| ICD9CM     | 401.9       | Unspecified essential hypertension                                                                                                                       |
| ICD9CM     | 402.00      | Malignant hypertensive heart disease without heart failure                                                                                               |
| ICD9CM     | 402.01      | Malignant hypertensive heart disease with heart failure                                                                                                  |
| ICD9CM     | 402.10      | Benign hypertensive heart disease without heart failure                                                                                                  |
| ICD9CM     | 402.11      | Benign hypertensive heart disease with heart failure                                                                                                     |
| ICD9CM     | 402.90      | Unspecified hypertensive heart disease without heart failure                                                                                             |
| ICD9CM     | 402.91      | Unspecified hypertensive heart disease with heart failure                                                                                                |
| ICD9CM     | 403.00      | Hypertensive chronic kidney disease, malignant, with chronic kidney disease stage I through stage IV, or unspecified                                     |
| ICD9CM     | 403.01      | Hypertensive chronic kidney disease, malignant, with chronic kidney disease stage V or end stage renal disease                                           |
| ICD9CM     | 403.10      | Hypertensive chronic kidney disease, benign, with chronic kidney disease stage I through stage IV, or unspecified                                        |
| ICD9CM     | 403.11      | Hypertensive chronic kidney disease, benign, with chronic kidney disease stage V or end stage renal disease                                              |
| ICD9CM     | 403.90      | Hypertensive chronic kidney disease, unspecified, with chronic kidney disease stage I through stage IV, or unspecified                                   |
| ICD9CM     | 403.91      | Hypertensive chronic kidney disease, unspecified, with chronic kidney disease stage V or end stage renal disease                                         |
| ICD9CM     | 404.00      | Hypertensive heart and chronic kidney disease, malignant, without heart failure and with chronic kidney disease stage I through stage IV, or unspecified |
| ICD9CM     | 404.01      | Hypertensive heart and chronic kidney disease, malignant, with heart failure and with chronic kidney disease stage I through stage IV, or unspecified    |
| ICD9CM     | 404.02      | Hypertensive heart and chronic kidney disease, malignant, without heart failure and with chronic kidney disease stage V or end stage renal disease       |
| ICD9CM     | 404.03      | Hypertensive heart and chronic kidney disease, malignant, with heart failure and with chronic kidney disease stage V or end stage renal disease          |
| ICD9CM     | 404.10      | Hypertensive heart and chronic kidney disease, benign, without heart failure and with chronic kidney disease stage I through stage IV, or unspecified    |

Continued on next page

**Table12 – continued from previous page**

| CodeSystem | ConceptCode      | ConceptName                                                                                                                                                |
|------------|------------------|------------------------------------------------------------------------------------------------------------------------------------------------------------|
| ICD9CM     | 404.11           | Hypertensive heart and chronic kidney disease, benign, with heart failure and with chronic kidney disease stage I through stage IV, or unspecified         |
| ICD9CM     | 404.12           | Hypertensive heart and chronic kidney disease, benign, without heart failure and with chronic kidney disease stage V or end stage renal disease            |
| ICD9CM     | 404.13           | Hypertensive heart and chronic kidney disease, benign, with heart failure and chronic kidney disease stage V or end stage renal disease                    |
| ICD9CM     | 404.90           | Hypertensive heart and chronic kidney disease, unspecified, without heart failure and with chronic kidney disease stage I through stage IV, or unspecified |
| ICD9CM     | 404.91           | Hypertensive heart and chronic kidney disease, unspecified, with heart failure and with chronic kidney disease stage I through stage IV, or unspecified    |
| ICD9CM     | 404.92           | Hypertensive heart and chronic kidney disease, unspecified, without heart failure and with chronic kidney disease stage V or end stage renal disease       |
| ICD9CM     | 404.93           | Hypertensive heart and chronic kidney disease, unspecified, with heart failure and chronic kidney disease stage V or end stage renal disease               |
| ICD9CM     | 405.01           | Malignant renovascular hypertension                                                                                                                        |
| ICD9CM     | 405.09           | Other malignant secondary hypertension                                                                                                                     |
| ICD9CM     | 405.11           | Benign renovascular hypertension                                                                                                                           |
| ICD9CM     | 405.19           | Other benign secondary hypertension                                                                                                                        |
| ICD9CM     | 405.91           | Unspecified renovascular hypertension                                                                                                                      |
| ICD9CM     | 405.99           | Other unspecified secondary hypertension                                                                                                                   |
| SNOMED CT  | 1201005          | Benign essential hypertension                                                                                                                              |
| SNOMED CT  | 10725009         | Benign hypertension                                                                                                                                        |
| SNOMED CT  | 14973001         | Renal sclerosis with hypertension                                                                                                                          |
| SNOMED CT  | 26078007         | Hypertension secondary to renal disease complicating AND/OR reason for care during childbirth                                                              |
| SNOMED CT  | 28119000         | Renal hypertension                                                                                                                                         |
| SNOMED CT  | 31992008         | Secondary hypertension                                                                                                                                     |
| SNOMED CT  | 762463000        | Diastolic hypertension and systolic hypertension                                                                                                           |
| SNOMED CT  | 284981000119102  | Chronic kidney disease stage 2 due to benign hypertension                                                                                                  |
| SNOMED CT  | 284991000119104  | Chronic kidney disease stage 3 due to benign hypertension                                                                                                  |
| SNOMED CT  | 461301000124109  | Resistant hypertensive disorder                                                                                                                            |
| SNOMED CT  | 1078301000112109 | Multiple drug intolerant hypertension                                                                                                                      |
| SNOMED CT  | 194783001        | Malignant secondary renovascular hypertension                                                                                                              |
| SNOMED CT  | 194785008        | Benign secondary hypertension                                                                                                                              |
| SNOMED CT  | 194788005        | Hypertension secondary to endocrine disorder                                                                                                               |
| SNOMED CT  | 194791005        | Hypertension secondary to drug                                                                                                                             |

Continued on next page

**Table12 – continued from previous page**

| CodeSystem | ConceptCode | ConceptName                                                                                   |
|------------|-------------|-----------------------------------------------------------------------------------------------|
| SNOMED CT  | 199008003   | Pre-existing secondary hypertension complicating pregnancy, childbirth and puerperium         |
| SNOMED CT  | 169465000   | Hypertension induced by oral contraceptive pill                                               |
| SNOMED CT  | 371125006   | Labile essential hypertension                                                                 |
| SNOMED CT  | 38341003    | Hypertensive disorder                                                                         |
| SNOMED CT  | 39018007    | Renal arterial hypertension                                                                   |
| SNOMED CT  | 39727004    | Hypertension secondary to renal disease complicating AND/OR reason for care during puerperium |
| SNOMED CT  | 46481004    | Low-renin essential hypertension                                                              |
| SNOMED CT  | 48146000    | Diastolic hypertension                                                                        |
| SNOMED CT  | 48552006    | Hypertension secondary to renal disease complicating AND/OR reason for care during pregnancy  |
| SNOMED CT  | 56218007    | Systolic hypertension                                                                         |
| SNOMED CT  | 57684003    | Parenchymal renal hypertension                                                                |
| SNOMED CT  | 59621000    | Essential hypertension                                                                        |
| SNOMED CT  | 59720008    | Sustained diastolic hypertension                                                              |
| SNOMED CT  | 65518004    | Labile diastolic hypertension                                                                 |
| SNOMED CT  | 73410007    | Benign secondary renovascular hypertension                                                    |
| SNOMED CT  | 74451002    | Secondary diastolic hypertension                                                              |
| SNOMED CT  | 78975002    | Malignant essential hypertension                                                              |
| SNOMED CT  | 427889009   | Hypertension associated with transplantation                                                  |
| SNOMED CT  | 428575007   | Hypertension secondary to kidney transplant                                                   |
| SNOMED CT  | 429457004   | Systolic essential hypertension                                                               |
| SNOMED CT  | 89242004    | Malignant secondary hypertension                                                              |
| SNOMED CT  | 111438007   | Hypertension secondary to renal disease in obstetric context                                  |
| SNOMED CT  | 123799005   | Renovascular hypertension                                                                     |
| SNOMED CT  | 123800009   | Goldblatt hypertension                                                                        |
| SNOMED CT  | 8218002     | Chronic hypertension complicating AND/OR reason for care during childbirth                    |
| SNOMED CT  | 8762007     | Chronic hypertension in obstetric context                                                     |
| SNOMED CT  | 9901000     | Essential hypertension complicating AND/OR reason for care during puerperium                  |
| SNOMED CT  | 10562009    | Malignant hypertension complicating AND/OR reason for care during childbirth                  |
| SNOMED CT  | 15394000    | Toxemia of pregnancy                                                                          |
| SNOMED CT  | 18416000    | Essential hypertension complicating AND/OR reason for care during childbirth                  |
| SNOMED CT  | 19769006    | High-renin essential hypertension                                                             |
| SNOMED CT  | 23130000    | Paroxysmal hypertension                                                                       |
| SNOMED CT  | 23717007    | Benign essential hypertension complicating AND/OR reason for care during pregnancy            |
| SNOMED CT  | 23786008    | Malignant hypertension complicating AND/OR reason for care during puerperium                  |

Continued on next page

**Table12 – continued from previous page**

| CodeSystem | ConceptCode | ConceptName                                                                                                                 |
|------------|-------------|-----------------------------------------------------------------------------------------------------------------------------|
| SNOMED CT  | 24042004    | Chronic hypertension complicating AND/OR reason for care during puerperium                                                  |
| SNOMED CT  | 29259002    | Malignant hypertension complicating AND/OR reason for care during pregnancy                                                 |
| SNOMED CT  | 31407004    | Pre-existing hypertension complicating AND/OR reason for care during puerperium                                             |
| SNOMED CT  | 34694006    | Pre-existing hypertension complicating AND/OR reason for care during childbirth                                             |
| SNOMED CT  | 35303009    | Benign essential hypertension complicating AND/OR reason for care during puerperium                                         |
| SNOMED CT  | 1204139007  | Hypertension due to congenital adrenal hyperplasia                                                                          |
| SNOMED CT  | 1208845005  | Secondary hypertension due to congenital heart disorder                                                                     |
| SNOMED CT  | 1208839002  | Secondary hypertension due to renal tubular disorder                                                                        |
| SNOMED CT  | 198941007   | Hypertension complicating pregnancy, childbirth and the puerperium                                                          |
| SNOMED CT  | 198942000   | Benign essential hypertension complicating pregnancy, childbirth and the puerperium                                         |
| SNOMED CT  | 198944004   | Benign essential hypertension complicating pregnancy, childbirth and the puerperium - delivered                             |
| SNOMED CT  | 198945003   | Benign essential hypertension complicating pregnancy, childbirth and the puerperium - delivered with postnatal complication |
| SNOMED CT  | 198946002   | Benign essential hypertension complicating pregnancy, childbirth and the puerperium - not delivered                         |
| SNOMED CT  | 198947006   | Benign essential hypertension complicating pregnancy, childbirth and the puerperium with postnatal complication             |
| SNOMED CT  | 198949009   | Renal hypertension complicating pregnancy, childbirth and the puerperium                                                    |
| SNOMED CT  | 198951008   | Renal hypertension complicating pregnancy, childbirth and the puerperium - delivered                                        |
| SNOMED CT  | 198952001   | Renal hypertension complicating pregnancy, childbirth and the puerperium - delivered with postnatal complication            |
| SNOMED CT  | 198953006   | Renal hypertension complicating pregnancy, childbirth and the puerperium - not delivered                                    |
| SNOMED CT  | 198965005   | Transient hypertension of pregnancy - delivered                                                                             |
| SNOMED CT  | 198966006   | Transient hypertension of pregnancy - delivered with postnatal complication                                                 |
| SNOMED CT  | 198967002   | Transient hypertension of pregnancy - not delivered                                                                         |
| SNOMED CT  | 198968007   | Transient hypertension of pregnancy with postnatal complication                                                             |
| SNOMED CT  | 198983002   | Severe pre-eclampsia - delivered                                                                                            |
| SNOMED CT  | 198984008   | Severe pre-eclampsia - delivered with postnatal complication                                                                |

Continued on next page

**Table12 – continued from previous page**

| CodeSystem | ConceptCode     | ConceptName                                                                                                  |
|------------|-----------------|--------------------------------------------------------------------------------------------------------------|
| SNOMED CT  | 198985009       | Severe pre-eclampsia - not delivered                                                                         |
| SNOMED CT  | 198986005       | Severe pre-eclampsia with postnatal complication                                                             |
| SNOMED CT  | 198997005       | Pre-eclampsia or eclampsia with pre-existing hypertension                                                    |
| SNOMED CT  | 198999008       | Pre-eclampsia or eclampsia with pre-existing hypertension<br>- delivered                                     |
| SNOMED CT  | 199000005       | Pre-eclampsia or eclampsia with pre-existing hypertension<br>- delivered with postnatal complication         |
| SNOMED CT  | 199002002       | Pre-eclampsia or eclampsia with pre-existing hypertension<br>- not delivered                                 |
| SNOMED CT  | 199003007       | Pre-eclampsia or eclampsia with pre-existing hypertension<br>with postnatal complication                     |
| SNOMED CT  | 199005000       | Pre-existing hypertension complicating pregnancy, child-<br>birth and puerperium                             |
| SNOMED CT  | 199007008       | Pre-existing hypertensive heart and renal disease complicat-<br>ing pregnancy, childbirth and the puerperium |
| SNOMED CT  | 765182005       | Postpartum pre-eclampsia                                                                                     |
| SNOMED CT  | 766937004       | Hypertension due to gain-of-function mutation in mineralo-<br>corticoid receptor                             |
| SNOMED CT  | 871642009       | Hypertension due to aortic arch obstruction                                                                  |
| SNOMED CT  | 541000119105    | Hypertension complicating pregnancy, childbirth and the<br>puerperium, antepartum                            |
| SNOMED CT  | 5501000119106   | Postoperative hypertension                                                                                   |
| SNOMED CT  | 40511000119107  | Postpartum pre-existing essential hypertension                                                               |
| SNOMED CT  | 40521000119100  | Postpartum pregnancy-induced hypertension                                                                    |
| SNOMED CT  | 71421000119105  | Hypertension in chronic kidney disease due to type 2 dia-<br>betes mellitus                                  |
| SNOMED CT  | 71701000119105  | Hypertension in chronic kidney disease due to type 1 dia-<br>betes mellitus                                  |
| SNOMED CT  | 82771000119102  | Hypertension complicating pregnancy                                                                          |
| SNOMED CT  | 118781000119108 | Pre-existing hypertensive chronic kidney disease in mother<br>complicating pregnancy                         |
| SNOMED CT  | 127991000119101 | Hypertension concurrent and due to end stage renal disease<br>on dialysis due to type 2 diabetes mellitus    |
| SNOMED CT  | 128001000119105 | Hypertension concurrent and due to end stage renal disease<br>on dialysis due to type 1 diabetes mellitus    |
| SNOMED CT  | 132721000119104 | Hypertensive emergency                                                                                       |
| SNOMED CT  | 140101000119109 | Hypertension in chronic kidney disease stage 5 due to type<br>2 diabetes mellitus                            |
| SNOMED CT  | 140111000119107 | Hypertension in chronic kidney disease stage 4 due to type<br>2 diabetes mellitus                            |
| SNOMED CT  | 140121000119100 | Hypertension in chronic kidney disease stage 3 due to type<br>2 diabetes mellitus                            |

Continued on next page

**Table12 – continued from previous page**

| CodeSystem | ConceptCode       | ConceptName                                                                                  |
|------------|-------------------|----------------------------------------------------------------------------------------------|
| SNOMED CT  | 140131000119102   | Hypertension in chronic kidney disease stage 2 due to type 2 diabetes mellitus               |
| SNOMED CT  | 367821000119106   | Page kidney                                                                                  |
| SNOMED CT  | 434711000124103   | Perioperative hypertension                                                                   |
| SNOMED CT  | 10752641000119102 | Eclampsia with pre-existing hypertension in childbirth                                       |
| SNOMED CT  | 10757401000119104 | Pre-existing hypertensive heart and chronic kidney disease in mother complicating childbirth |
| SNOMED CT  | 16229371000119106 | Labile systemic arterial hypertension                                                        |
| SNOMED CT  | 48194001          | GH - Gestational hypertension                                                                |
| SNOMED CT  | 95605009          | Hemolysis-elevated liver enzymes-low platelet count syndrome                                 |
| SNOMED CT  | 206596003         | Neonatal hypertension                                                                        |
| SNOMED CT  | 237279007         | Transient hypertension of pregnancy                                                          |
| SNOMED CT  | 237281009         | Moderate proteinuric hypertension of pregnancy                                               |
| SNOMED CT  | 237282002         | Impending eclampsia                                                                          |
| SNOMED CT  | 367390009         | Hypertension in the obstetric context                                                        |
| SNOMED CT  | 397748008         | Hypertension with albuminuria                                                                |
| SNOMED CT  | 398254007         | Toxemia of pregnancy                                                                         |
| SNOMED CT  | 37618003          | Chronic hypertension complicating AND/OR reason for care during pregnancy                    |
| SNOMED CT  | 41114007          | Mild pre-eclampsia                                                                           |
| SNOMED CT  | 46764007          | Severe pre-eclampsia                                                                         |
| SNOMED CT  | 52698002          | Transient hypertension                                                                       |
| SNOMED CT  | 63287004          | Benign essential hypertension in obstetric context                                           |
| SNOMED CT  | 65402008          | Pre-existing hypertension complicating AND/OR reason for care during pregnancy               |
| SNOMED CT  | 67359005          | Pre-eclampsia added to pre-existing hypertension                                             |
| SNOMED CT  | 69909000          | Eclampsia added to pre-existing hypertension                                                 |
| SNOMED CT  | 70272006          | Malignant hypertension                                                                       |
| SNOMED CT  | 71874008          | Benign essential hypertension complicating AND/OR reason for care during childbirth          |
| SNOMED CT  | 72022006          | Essential hypertension in obstetric context                                                  |
| SNOMED CT  | 78808002          | Essential hypertension complicating AND/OR reason for care during pregnancy                  |
| SNOMED CT  | 81626002          | Malignant hypertension in obstetric context                                                  |
| SNOMED CT  | 429198000         | Exertional hypertension                                                                      |
| SNOMED CT  | 443482000         | Hypertensive urgency                                                                         |
| SNOMED CT  | 472749004         | Coronary sinus hypertension as complication of procedure                                     |
| SNOMED CT  | 697929007         | Intermittent hypertension                                                                    |
| SNOMED CT  | 697930002         | Labile hypertension due to being in a clinical environment                                   |
| SNOMED CT  | 698638005         | Pregnancy induced hypertension with pulmonary edema                                          |
| SNOMED CT  | 698640000         | Hypertension in the puerperium with pulmonary edema                                          |

Continued on next page



**Table12 – continued from previous page**

| CodeSystem | ConceptCode | ConceptName                                                            |
|------------|-------------|------------------------------------------------------------------------|
| SNOMED CT  | 704667004   | Hypertension concurrent and due to end stage renal disease on dialysis |
| SNOMED CT  | 706882009   | Hypertensive crisis                                                    |
| SNOMED CT  | 712832005   | Supine hypertension                                                    |
| SNOMED CT  | 720568003   | Brachydactyly and arterial hypertension syndrome                       |
| SNOMED CT  | 288250001   | Maternal hypertension                                                  |
| SNOMED CT  | 307632004   | Non-proteinuric hypertension of pregnancy                              |
| SNOMED CT  | 84094009    | Rebound hypertension                                                   |
| SNOMED CT  | 86041002    | Pre-existing hypertension in obstetric context                         |

#### 1.4.10 Major Depressive Disorder

Table 13: Concept codes used to identify major depression conditions.

| CodeSystem | ConceptCode | ConceptName                                                                  |
|------------|-------------|------------------------------------------------------------------------------|
| ICD10CM    | F32.0       | Major depressive disorder, single episode, mild                              |
| ICD10CM    | F32.1       | Major depressive disorder, single episode, moderate                          |
| ICD10CM    | F32.2       | Major depressive disorder, single episode, severe without psychotic features |
| ICD10CM    | F32.3       | Major depressive disorder, single episode, severe with psychotic features    |
| ICD10CM    | F32.4       | Major depressive disorder, single episode, in partial remission              |
| ICD10CM    | F32.9       | Major depressive disorder, single episode, unspecified                       |
| ICD10CM    | F33.0       | Major depressive disorder, recurrent, mild                                   |
| ICD10CM    | F33.1       | Major depressive disorder, recurrent, moderate                               |
| ICD10CM    | F33.2       | Major depressive disorder, recurrent severe without psychotic features       |
| ICD10CM    | F33.3       | Major depressive disorder, recurrent, severe with psychotic symptoms         |
| ICD10CM    | F33.41      | Major depressive disorder, recurrent, in partial remission                   |
| ICD10CM    | F33.9       | Major depressive disorder, recurrent, unspecified                            |
| SNOMED CT  | 832007      | Moderate major depression                                                    |
| SNOMED CT  | 2618002     | Chronic recurrent major depressive disorder                                  |
| SNOMED CT  | 14183003    | Chronic major depressive disorder, single episode                            |
| SNOMED CT  | 15193003    | Severe recurrent major depression with psychotic features, mood-incongruent  |
| SNOMED CT  | 15639000    | Moderate major depression, single episode                                    |
| SNOMED CT  | 18818009    | Moderate recurrent major depression                                          |

Continued on next page

**Table13 – continued from previous page**

| CodeSystem | ConceptCode       | ConceptName                                                                        |
|------------|-------------------|------------------------------------------------------------------------------------|
| SNOMED CT  | 20250007          | Severe major depression, single episode, with psychotic features, mood-incongruent |
| SNOMED CT  | 25922000          | Major depressive disorder, single episode with postpartum onset                    |
| SNOMED CT  | 28475009          | Severe recurrent major depression with psychotic features                          |
| SNOMED CT  | 33078009          | Severe recurrent major depression with psychotic features, mood-congruent          |
| SNOMED CT  | 33736005          | Severe major depression with psychotic features, mood-congruent                    |
| SNOMED CT  | 251000119105      | Severe major depression, single episode                                            |
| SNOMED CT  | 281000119103      | Severe recurrent major depression                                                  |
| SNOMED CT  | 10811121000119102 | Major depressive disorder in mother complicating childbirth                        |
| SNOMED CT  | 10811161000119107 | Major depressive disorder in mother complicating pregnancy                         |
| SNOMED CT  | 16264621000119109 | Recurrent mild major depressive disorder co-occurrent with anxiety                 |
| SNOMED CT  | 16264901000119109 | Recurrent moderate major depressive disorder co-occurrent with anxiety             |
| SNOMED CT  | 16265951000119109 | Mild major depressive disorder co-occurrent with anxiety single episode            |
| SNOMED CT  | 16266831000119100 | Moderate major depressive disorder co-occurrent with anxiety single episode        |
| SNOMED CT  | 16266991000119108 | Severe major depressive disorder co-occurrent with anxiety single episode          |
| SNOMED CT  | 191604000         | Single major depressive episode, severe, with psychosis                            |
| SNOMED CT  | 191610000         | Recurrent major depressive episodes, mild                                          |
| SNOMED CT  | 191611001         | Recurrent major depressive episodes, moderate                                      |
| SNOMED CT  | 191613003         | Recurrent major depressive episodes, severe, with psychosis                        |
| SNOMED CT  | 319768000         | Recurrent major depressive disorder with melancholic features                      |
| SNOMED CT  | 320751009         | Major depression, melancholic type                                                 |
| SNOMED CT  | 370143000         | Major depressive disorder                                                          |
| SNOMED CT  | 36474008          | Severe recurrent major depression without psychotic features                       |
| SNOMED CT  | 36923009          | Major depression, single episode                                                   |
| SNOMED CT  | 38694004          | Recurrent major depressive disorder with atypical features                         |
| SNOMED CT  | 39809009          | Recurrent major depressive disorder with catatonic features                        |
| SNOMED CT  | 40379007          | Mild recurrent major depression                                                    |
| SNOMED CT  | 42925002          | Major depressive disorder, single episode with atypical features                   |
| SNOMED CT  | 60099002          | Severe major depression with psychotic features, mood-incongruent                  |

Continued on next page

**Table13 – continued from previous page**

| CodeSystem | ConceptCode       | ConceptName                                                                        |
|------------|-------------------|------------------------------------------------------------------------------------|
| SNOMED CT  | 63778009          | Major depressive disorder, single episode with melancholic features                |
| SNOMED CT  | 66344007          | Recurrent major depression                                                         |
| SNOMED CT  | 69392006          | Major depressive disorder, single episode with catatonic features                  |
| SNOMED CT  | 71336009          | Recurrent major depressive disorder with postpartum onset                          |
| SNOMED CT  | 73867007          | Severe major depression with psychotic features                                    |
| SNOMED CT  | 75084000          | Severe major depression without psychotic features                                 |
| SNOMED CT  | 76441001          | Severe major depression, single episode, without psychotic features                |
| SNOMED CT  | 77911002          | Severe major depression, single episode, with psychotic features, mood-congruent   |
| SNOMED CT  | 79298009          | Mild major depression, single episode                                              |
| SNOMED CT  | 430852001         | Severe major depression, single episode, with psychotic features                   |
| SNOMED CT  | 450714000         | Severe major depression                                                            |
| SNOMED CT  | 719592004         | Moderately severe major depression                                                 |
| SNOMED CT  | 720451004         | Minimal recurrent major depression                                                 |
| SNOMED CT  | 720452006         | Moderately severe recurrent major depression                                       |
| SNOMED CT  | 720453001         | Moderately severe major depression single episode                                  |
| SNOMED CT  | 720454007         | Minimal major depression single episode                                            |
| SNOMED CT  | 720455008         | Minimal major depression                                                           |
| SNOMED CT  | 726772006         | Major depression with psychotic features                                           |
| SNOMED CT  | 268621008         | Recurrent major depressive episodes                                                |
| SNOMED CT  | 87512008          | Mild major depression                                                              |
| SNOMED CT  | 19527009          | Single episode of major depression in full remission                               |
| SNOMED CT  | 30605009          | Major depression in partial remission                                              |
| SNOMED CT  | 33135002          | Recurrent major depression in partial remission                                    |
| SNOMED CT  | 104851000119103   | Postpartum major depression in remission                                           |
| SNOMED CT  | 16264821000119108 | Recurrent severe major depressive disorder co-occurrent with anxiety               |
| SNOMED CT  | 16265061000119105 | Recurrent major depressive disorder co-occurrent with anxiety in full remission    |
| SNOMED CT  | 16265301000119106 | Recurrent major depressive disorder in partial remission co-occurrent with anxiety |
| SNOMED CT  | 42810003          | Major depression in remission                                                      |
| SNOMED CT  | 46244001          | Recurrent major depression in full remission                                       |
| SNOMED CT  | 63412003          | Major depression in full remission                                                 |
| SNOMED CT  | 68019004          | Recurrent major depression in remission                                            |
| SNOMED CT  | 70747007          | Major depression single episode, in partial remission                              |

#### 1.4.11 Myocardial Infarction

Table 14: Concept codes used to identify acute myocardial infarction conditions.

| CodeSystem | ConceptCode       | ConceptName                                                                                         |
|------------|-------------------|-----------------------------------------------------------------------------------------------------|
| ICD10CM    | I21.01            | ST elevation (STEMI) myocardial infarction involving left main coronary artery                      |
| ICD10CM    | I21.02            | ST elevation (STEMI) myocardial infarction involving left anterior descending coronary artery       |
| ICD10CM    | I21.09            | ST elevation (STEMI) myocardial infarction involving other coronary artery of anterior wall         |
| ICD10CM    | I21.11            | ST elevation (STEMI) myocardial infarction involving right coronary artery                          |
| ICD10CM    | I21.19            | ST elevation (STEMI) myocardial infarction involving other coronary artery of inferior wall         |
| ICD10CM    | I21.21            | ST elevation (STEMI) myocardial infarction involving left circumflex coronary artery                |
| ICD10CM    | I21.29            | ST elevation (STEMI) myocardial infarction involving other sites                                    |
| ICD10CM    | I21.3             | ST elevation (STEMI) myocardial infarction of unspecified site                                      |
| ICD10CM    | I21.4             | Non-ST elevation (NSTEMI) myocardial infarction                                                     |
| ICD10CM    | I21.9             | Acute myocardial infarction, unspecified                                                            |
| ICD10CM    | I21.A1            | Myocardial infarction type 2                                                                        |
| ICD10CM    | I21.A9            | Other myocardial infarction type                                                                    |
| SNOMED CT  | 282006            | Acute myocardial infarction of basal-lateral wall                                                   |
| SNOMED CT  | 10273003          | Acute infarction of papillary muscle                                                                |
| SNOMED CT  | 15990001          | Acute myocardial infarction of posterolateral wall                                                  |
| SNOMED CT  | 30277009          | Rupture of ventricle due to acute myocardial infarction                                             |
| SNOMED CT  | 17531000119105    | Acute myocardial infarction due to left coronary artery occlusion                                   |
| SNOMED CT  | 23311000119105    | Acute myocardial infarction due to right coronary artery occlusion                                  |
| SNOMED CT  | 285981000119103   | Acute ST segment elevation myocardial infarction involving left anterior descending coronary artery |
| SNOMED CT  | 15962541000119106 | Acute ST segment elevation myocardial infarction of anteroapical wall                               |
| SNOMED CT  | 15713081000119108 | Acute ST segment elevation myocardial infarction involving left main coronary artery                |
| SNOMED CT  | 15713121000119105 | Acute STEMI (ST elevation myocardial infarction) due to RCA (right coronary artery) occlusion       |
| SNOMED CT  | 194802003         | True posterior myocardial infarction                                                                |
| SNOMED CT  | 194809007         | Acute myocardial infarction of atrium                                                               |
| SNOMED CT  | 233825009         | Acute Q wave infarction - anteroseptal                                                              |
| SNOMED CT  | 233826005         | Acute non-Q wave infarction - anteroseptal                                                          |
| SNOMED CT  | 233827001         | Acute Q wave infarction - anterolateral                                                             |

Continued on next page

**Table14 – continued from previous page**

| CodeSystem | ConceptCode | ConceptName                                                                                                         |
|------------|-------------|---------------------------------------------------------------------------------------------------------------------|
| SNOMED CT  | 233828006   | Acute non-Q wave infarction - anterolateral                                                                         |
| SNOMED CT  | 233829003   | Acute Q wave infarction - inferior                                                                                  |
| SNOMED CT  | 233830008   | Acute non-Q wave infarction - inferior                                                                              |
| SNOMED CT  | 233831007   | Acute Q wave infarction - inferolateral                                                                             |
| SNOMED CT  | 233832000   | Acute non-Q wave infarction - inferolateral                                                                         |
| SNOMED CT  | 233833005   | Acute Q wave infarction - lateral                                                                                   |
| SNOMED CT  | 233834004   | Acute non-Q wave infarction - lateral                                                                               |
| SNOMED CT  | 233835003   | Acute widespread myocardial infarction                                                                              |
| SNOMED CT  | 233836002   | Acute Q wave infarction - widespread                                                                                |
| SNOMED CT  | 233837006   | Acute non-Q wave infarction - widespread                                                                            |
| SNOMED CT  | 233838001   | Acute posterior myocardial infarction                                                                               |
| SNOMED CT  | 401303003   | Acute ST segment elevation myocardial infarction                                                                    |
| SNOMED CT  | 401314000   | Acute non-ST segment elevation myocardial infarction                                                                |
| SNOMED CT  | 52035003    | Acute anteroapical myocardial infarction                                                                            |
| SNOMED CT  | 54329005    | Acute myocardial infarction of anterior wall                                                                        |
| SNOMED CT  | 57054005    | Acute myocardial infarction                                                                                         |
| SNOMED CT  | 58612006    | Acute myocardial infarction of lateral wall                                                                         |
| SNOMED CT  | 59063002    | Acute myocardial infarction of apical-lateral wall                                                                  |
| SNOMED CT  | 62695002    | Acute anteroseptal myocardial infarction                                                                            |
| SNOMED CT  | 64627002    | Acute myocardial infarction of high lateral wall                                                                    |
| SNOMED CT  | 65547006    | Acute myocardial infarction of inferolateral wall                                                                   |
| SNOMED CT  | 70211005    | Acute myocardial infarction of anterolateral wall                                                                   |
| SNOMED CT  | 70422006    | Acute subendocardial infarction                                                                                     |
| SNOMED CT  | 70998009    | Acute myocardial infarction of posterobasal wall                                                                    |
| SNOMED CT  | 73795002    | Acute myocardial infarction of inferior wall                                                                        |
| SNOMED CT  | 76593002    | Acute myocardial infarction of inferoposterior wall                                                                 |
| SNOMED CT  | 79009004    | Acute myocardial infarction of septum                                                                               |
| SNOMED CT  | 703164000   | Acute anterior ST segment elevation myocardial infarction                                                           |
| SNOMED CT  | 304914007   | Acute Q wave myocardial infarction                                                                                  |
| SNOMED CT  | 307140009   | Acute non-Q wave infarction                                                                                         |
| SNOMED CT  | 1163440003  | Postoperative acute myocardial infarction                                                                           |
| SNOMED CT  | 1208872002  | Subsequent anterior non-ST segment elevation myocardial infarction                                                  |
| SNOMED CT  | 836293000   | Acute myocardial infarction of right ventricle                                                                      |
| SNOMED CT  | 836294006   | Acute myocardial infarction of apex of heart                                                                        |
| SNOMED CT  | 836295007   | Acute myocardial infarction of inferolateral wall with posterior extension                                          |
| SNOMED CT  | 840309000   | Acute ST segment elevation myocardial infarction due to proximal left anterior descending coronary artery occlusion |
| SNOMED CT  | 840312002   | Acute ST segment elevation myocardial infarction due to mid left anterior descending coronary artery occlusion      |
| SNOMED CT  | 840316004   | Acute ST segment elevation myocardial infarction due to distal left anterior descending coronary artery occlusion   |

Continued on next page

**Table14 – continued from previous page**

| CodeSystem | ConceptCode       | ConceptName                                                                                                                                |
|------------|-------------------|--------------------------------------------------------------------------------------------------------------------------------------------|
| SNOMED CT  | 840609007         | Acute ST segment elevation myocardial infarction due to occlusion of anterior descending branch of left coronary artery                    |
| SNOMED CT  | 840680009         | Acute ST segment elevation myocardial infarction due to occlusion of septal branch of anterior descending branch of left coronary artery   |
| SNOMED CT  | 846668006         | Acute ST segment elevation myocardial infarction due to occlusion of diagonal branch of anterior descending branch of left coronary artery |
| SNOMED CT  | 846683001         | Acute ST segment elevation myocardial infarction due to occlusion of intermediate artery                                                   |
| SNOMED CT  | 868214006         | Acute ST segment elevation myocardial infarction due to occlusion of proximal portion of right coronary artery                             |
| SNOMED CT  | 868217004         | Acute ST segment elevation myocardial infarction due to occlusion of distal portion of right coronary artery                               |
| SNOMED CT  | 868220007         | Acute ST segment elevation myocardial infarction due to occlusion of mid portion of right coronary artery                                  |
| SNOMED CT  | 868224003         | Acute ST segment elevation myocardial infarction due to occlusion of marginal branch of right coronary artery                              |
| SNOMED CT  | 868225002         | Acute ST segment elevation myocardial infarction due to occlusion of posterior descending branch of right coronary artery                  |
| SNOMED CT  | 868226001         | Acute ST segment elevation myocardial infarction due to occlusion of posterior lateral branch of right coronary artery                     |
| SNOMED CT  | 12238111000119106 | Acute ST segment elevation myocardial infarction of inferolateral wall                                                                     |
| SNOMED CT  | 12238151000119107 | Acute ST segment elevation myocardial infarction of inferoposterior wall                                                                   |
| SNOMED CT  | 15712841000119100 | Acute ST segment elevation myocardial infarction of posterolateral wall                                                                    |
| SNOMED CT  | 15712881000119105 | Acute ST segment elevation myocardial infarction of anterolateral wall                                                                     |
| SNOMED CT  | 15712921000119103 | Acute ST segment elevation myocardial infarction of lateral wall                                                                           |
| SNOMED CT  | 15712961000119108 | Acute ST segment elevation myocardial infarction of anteroseptal wall                                                                      |
| SNOMED CT  | 15713041000119103 | Acute ST segment elevation myocardial infarction of posterior wall                                                                         |
| SNOMED CT  | 15713161000119100 | Acute ST segment elevation myocardial infarction of septum                                                                                 |
| SNOMED CT  | 15713201000119105 | Acute ST segment elevation myocardial infarction of posterobasal wall                                                                      |
| SNOMED CT  | 15963181000119104 | Acute ST segment elevation myocardial infarction due to occlusion of circumflex coronary artery                                            |

Continued on next page

**Table14 – continued from previous page**

| CodeSystem | ConceptCode       | ConceptName                                                                                                                 |
|------------|-------------------|-----------------------------------------------------------------------------------------------------------------------------|
| SNOMED CT  | 1204151009        | Acute inferior non-ST segment elevation myocardial infarction of right ventricle                                            |
| SNOMED CT  | 1204154001        | Acute anterior non-ST segment elevation myocardial infarction with right ventricular involvement                            |
| SNOMED CT  | 1204155000        | Acute anterior non-ST segment elevation myocardial infarction                                                               |
| SNOMED CT  | 1204152002        | Acute inferior non-ST segment elevation myocardial infarction                                                               |
| SNOMED CT  | 1204222000        | Acute non-ST segment elevation myocardial infarction of right ventricle                                                     |
| SNOMED CT  | 15713001000119100 | Acute ST segment elevation myocardial infarction of atrium                                                                  |
| SNOMED CT  | 44811000087108    | Acute ST segment elevation myocardial infarction due to distal left circumflex coronary artery occlusion                    |
| SNOMED CT  | 44821000087100    | Acute ST segment elevation myocardial infarction due to mid left circumflex coronary artery occlusion                       |
| SNOMED CT  | 44831000087103    | Acute ST segment elevation myocardial infarction due to obtuse marginal branch of left circumflex coronary artery occlusion |
| SNOMED CT  | 44841000087109    | Acute ST segment elevation myocardial infarction due to posterolateral branch of left circumflex coronary artery occlusion  |
| SNOMED CT  | 44851000087107    | Acute ST segment elevation myocardial infarction due to proximal left circumflex coronary artery occlusion                  |
| SNOMED CT  | 703165004         | Acute ST segment elevation myocardial infarction of anterior wall involving right ventricle                                 |
| SNOMED CT  | 703212004         | Acute myocardial infarction during procedure                                                                                |
| SNOMED CT  | 703213009         | Acute ST segment elevation myocardial infarction of inferior wall                                                           |
| SNOMED CT  | 703251009         | Acute myocardial infarction of inferior wall involving right ventricle                                                      |
| SNOMED CT  | 703252002         | Acute myocardial infarction of anterior wall involving right ventricle                                                      |
| SNOMED CT  | 703253007         | Acute ST segment elevation myocardial infarction of inferior wall involving right ventricle                                 |
| SNOMED CT  | 896689003         | Acute myocardial infarction due to occlusion of circumflex branch of left coronary artery                                   |
| SNOMED CT  | 896691006         | Acute ST segment elevation myocardial infarction due to occlusion of circumflex branch of left coronary artery              |
| SNOMED CT  | 896696001         | Acute ST segment elevation myocardial infarction of apex of heart                                                           |
| SNOMED CT  | 896697005         | Acute ST segment elevation myocardial infarction of right ventricle                                                         |

### 1.4.12 Osteoporosis

Table 15: Concept codes used to identify osteoporosis conditions.

| CodeSystem | ConceptCode | ConceptName                                                         |
|------------|-------------|---------------------------------------------------------------------|
| ICD10CM    | M81.6       | Localized osteoporosis [Lequesne]                                   |
| ICD10CM    | M81.0       | Age-related osteoporosis without current pathological fracture      |
| ICD10CM    | M81.8       | Other osteoporosis without current pathological fracture            |
| ICD9CM     | 733.01      | Senile osteoporosis                                                 |
| ICD9CM     | 733.02      | Idiopathic osteoporosis                                             |
| ICD9CM     | 733.03      | Disuse osteoporosis                                                 |
| ICD9CM     | 733.09      | Other osteoporosis                                                  |
| SNOMED CT  | 3345002     | Idiopathic osteoporosis                                             |
| SNOMED CT  | 14651005    | Drug-induced osteoporosis                                           |
| SNOMED CT  | 32369003    | Menopausal osteoporosis                                             |
| SNOMED CT  | 735617003   | Premenopausal idiopathic osteoporosis                               |
| SNOMED CT  | 735618008   | Osteoporosis due to malabsorption                                   |
| SNOMED CT  | 739301006   | Osteoporosis co-occurrent and due to multiple myeloma               |
| SNOMED CT  | 1515008     | Massive osteolysis                                                  |
| SNOMED CT  | 18040001    | Type II osteoporosis                                                |
| SNOMED CT  | 203429007   | Idiopathic generalized osteoporosis                                 |
| SNOMED CT  | 203433000   | Postoophorectomy osteoporosis                                       |
| SNOMED CT  | 203434006   | Post-surgical malabsorption osteoporosis                            |
| SNOMED CT  | 203435007   | Localized osteoporosis - Lequesne                                   |
| SNOMED CT  | 203437004   | Osteoporosis in endocrine disorders                                 |
| SNOMED CT  | 203438009   | Vertebral osteoporosis                                              |
| SNOMED CT  | 203444008   | Postoophorectomy osteoporosis with pathological fracture            |
| SNOMED CT  | 203446005   | Post-surgical malabsorption osteoporosis with pathological fracture |
| SNOMED CT  | 203657009   | Osteoporotic kyphosis                                               |
| SNOMED CT  | 240155001   | Adult idiopathic generalized osteoporosis                           |
| SNOMED CT  | 240157009   | Secondary generalized osteoporosis                                  |
| SNOMED CT  | 240158004   | Regional migrating osteoporosis                                     |
| SNOMED CT  | 240159007   | Transient osteoporosis of hip                                       |
| SNOMED CT  | 240161003   | Disappearing bone disease                                           |
| SNOMED CT  | 240162005   | Secondary localized osteoporosis                                    |
| SNOMED CT  | 240164006   | Post-irradiation osteoporosis                                       |
| SNOMED CT  | 240198002   | Osteoporotic vertebral collapse                                     |
| SNOMED CT  | 311806008   | Osteoporotic collapse of cervical vertebra                          |
| SNOMED CT  | 390833005   | Osteoporosis due to corticosteroid                                  |
| SNOMED CT  | 53174001    | Disuse osteoporosis                                                 |
| SNOMED CT  | 64859006    | Osteoporosis                                                        |
| SNOMED CT  | 699528002   | Transient osteoporosis                                              |
| SNOMED CT  | 703264005   | Secondary osteoporosis                                              |

Continued on next page



**Table15 – continued from previous page**

| CodeSystem | ConceptCode       | ConceptName                                                           |
|------------|-------------------|-----------------------------------------------------------------------|
| SNOMED CT  | 268028001         | Localized disuse osteoporosis                                         |
| SNOMED CT  | 276661002         | Primary osteoporosis                                                  |
| SNOMED CT  | 281387004         | Regional osteoporosis                                                 |
| SNOMED CT  | 102447009         | Postmenopausal osteoporosis                                           |
| SNOMED CT  | 109346000         | Osteoporotic bone marrow defect                                       |
| SNOMED CT  | 15743005          | Posttraumatic osteoporosis                                            |
| SNOMED CT  | 454201000124109   | Pathological fracture of left ulna due to osteoporosis                |
| SNOMED CT  | 11304761000119103 | Pathological fracture of right tibia due to osteoporosis              |
| SNOMED CT  | 11305081000119109 | Pathological fracture of right fibula due to osteoporosis             |
| SNOMED CT  | 11305121000119106 | Pathological fracture of left fibula due to osteoporosis              |
| SNOMED CT  | 11305721000119107 | Pathological fracture of right humerus due to secondary osteoporosis  |
| SNOMED CT  | 11305761000119102 | Pathological fracture of left humerus due to secondary osteoporosis   |
| SNOMED CT  | 11305801000119105 | Pathological fracture of right clavicle due to osteoporosis           |
| SNOMED CT  | 11305841000119107 | Pathological fracture of left clavicle due to osteoporosis            |
| SNOMED CT  | 11306041000119109 | Pathological fracture of right clavicle due to secondary osteoporosis |
| SNOMED CT  | 11309321000119105 | Pathological fracture of right foot due to osteoporosis               |
| SNOMED CT  | 11309361000119100 | Pathological fracture of left foot due to osteoporosis                |
| SNOMED CT  | 11309641000119108 | Pathological fracture of right foot due to secondary osteoporosis     |
| SNOMED CT  | 11309681000119103 | Pathological fracture of left foot due to secondary osteoporosis      |
| SNOMED CT  | 11309801000119107 | Pathological fracture of right femur due to osteoporosis              |
| SNOMED CT  | 11309841000119109 | Pathological fracture of left femur due to osteoporosis               |
| SNOMED CT  | 11310121000119102 | Pathological fracture of right femur due to secondary osteoporosis    |
| SNOMED CT  | 11310161000119107 | Pathological fracture of left femur due to secondary osteoporosis     |
| SNOMED CT  | 11310201000119102 | Pathological fracture of right ankle due to osteoporosis              |
| SNOMED CT  | 11310241000119100 | Pathological fracture of left ankle due to osteoporosis               |
| SNOMED CT  | 11311361000119103 | Secondary osteoporotic fracture of thoracic vertebra                  |
| SNOMED CT  | 11311441000119109 | Secondary osteoporotic fracture of lumbar vertebra                    |
| SNOMED CT  | 11311521000119104 | Secondary osteoporotic fracture of cervical vertebra                  |
| SNOMED CT  | 11311601000119109 | Osteoporotic fracture of vertebra                                     |
| SNOMED CT  | 11311641000119106 | Osteoporotic fracture of sacral vertebra                              |
| SNOMED CT  | 11311801000119105 | Secondary osteoporotic fracture of vertebra                           |
| SNOMED CT  | 11311841000119107 | Secondary osteoporotic fracture of sacral vertebra                    |
| SNOMED CT  | 11312241000119101 | Pathological fracture of right hand due to osteoporosis               |
| SNOMED CT  | 11312281000119106 | Pathological fracture of left hand due to osteoporosis                |
| SNOMED CT  | 11312721000119102 | Pathological fracture of right radius due to osteoporosis             |
| SNOMED CT  | 11312761000119107 | Pathological fracture of left radius due to osteoporosis              |

Continued on next page

**Table15 – continued from previous page**

| CodeSystem | ConceptCode       | ConceptName                                                                        |
|------------|-------------------|------------------------------------------------------------------------------------|
| SNOMED CT  | 11313281000119104 | Pathological fracture of right scapula due to osteoporosis                         |
| SNOMED CT  | 11313321000119109 | Pathological fracture of left scapula due to osteoporosis                          |
| SNOMED CT  | 11314841000119105 | Secondary osteoporotic fracture                                                    |
| SNOMED CT  | 11314881000119100 | Pathological fracture of right hip due to osteoporosis                             |
| SNOMED CT  | 11314921000119107 | Pathological fracture of left hip due to osteoporosis                              |
| SNOMED CT  | 11315121000119108 | Pathological fracture of proximal end of right femur due to secondary osteoporosis |
| SNOMED CT  | 11315161000119103 | Pathological fracture of left hip due to secondary osteoporosis                    |
| SNOMED CT  | 11874341000119106 | Osteoporotic fracture of left rib                                                  |
| SNOMED CT  | 11874381000119101 | Osteoporotic fracture of right rib                                                 |
| SNOMED CT  | 16280471000119103 | Pathological fracture of left tibia due to osteoporosis                            |
| SNOMED CT  | 11305481000119104 | Osteoporotic fracture of right humerus                                             |
| SNOMED CT  | 11305521000119104 | Osteoporotic fracture of left humerus                                              |
| SNOMED CT  | 11312681000119108 | Osteoporotic fracture of right ulna                                                |
| SNOMED CT  | 203445009         | Osteoporosis of disuse with pathological fracture                                  |
| SNOMED CT  | 203447001         | Drug-induced osteoporosis with pathological fracture                               |
| SNOMED CT  | 203448006         | Idiopathic osteoporosis with pathological fracture                                 |
| SNOMED CT  | 203450003         | Osteoporotic fracture of lumbar vertebra                                           |
| SNOMED CT  | 203451004         | Osteoporotic fracture of thoracic vertebra                                         |
| SNOMED CT  | 203452006         | Osteoporotic fracture of cervical vertebra                                         |
| SNOMED CT  | 203453001         | Postmenopausal osteoporosis with pathological fracture                             |
| SNOMED CT  | 240154002         | Idiopathic osteoporosis in pregnancy                                               |
| SNOMED CT  | 240156000         | Juvenile idiopathic generalized osteoporosis                                       |
| SNOMED CT  | 240160002         | Transient osteoporosis of hip in pregnancy                                         |
| SNOMED CT  | 311890007         | Osteoporotic collapse of lumbar vertebra                                           |
| SNOMED CT  | 311891006         | Osteoporotic collapse of thoracic vertebra                                         |
| SNOMED CT  | 431031001         | Osteoporotic fracture of neck of femur                                             |
| SNOMED CT  | 443165006         | Osteoporotic fracture                                                              |
| SNOMED CT  | 704282002         | Secondary osteoporotic fracture of ulna                                            |
| SNOMED CT  | 704283007         | Secondary osteoporotic fracture of tibia                                           |
| SNOMED CT  | 704284001         | Secondary osteoporotic fracture of scapula                                         |
| SNOMED CT  | 704285000         | Secondary osteoporotic fracture of radius                                          |
| SNOMED CT  | 704286004         | Secondary osteoporotic fracture of humerus                                         |
| SNOMED CT  | 704287008         | Secondary osteoporotic fracture of proximal femur                                  |
| SNOMED CT  | 704288003         | Secondary osteoporotic fracture of hand                                            |
| SNOMED CT  | 704289006         | Secondary osteoporotic fracture of foot                                            |
| SNOMED CT  | 704290002         | Secondary osteoporotic fracture of fibula                                          |
| SNOMED CT  | 704291003         | Secondary osteoporotic fracture of femur                                           |
| SNOMED CT  | 704292005         | Secondary osteoporotic fracture of clavicle                                        |
| SNOMED CT  | 704293000         | Secondary osteoporotic fracture of ankle                                           |
| SNOMED CT  | 704328003         | Osteoporotic fracture of ankle                                                     |
| SNOMED CT  | 704329006         | Osteoporotic fracture of clavicle                                                  |

Continued on next page

**Table15 – continued from previous page**

| CodeSystem | ConceptCode | ConceptName                              |
|------------|-------------|------------------------------------------|
| SNOMED CT  | 704330001   | Osteoporotic fracture of femur           |
| SNOMED CT  | 704331002   | Osteoporotic fracture of fibula          |
| SNOMED CT  | 704332009   | Osteoporotic fracture of bone of foot    |
| SNOMED CT  | 704333004   | Osteoporotic fracture of hand            |
| SNOMED CT  | 704334005   | Osteoporotic fracture of proximal femur  |
| SNOMED CT  | 704335006   | Osteoporotic fracture of humerus         |
| SNOMED CT  | 704336007   | Osteoporotic fracture of radius          |
| SNOMED CT  | 704337003   | Osteoporotic fracture of scapula         |
| SNOMED CT  | 704338008   | Osteoporotic fracture of tibia           |
| SNOMED CT  | 704339000   | Osteoporotic fracture of ulna            |
| SNOMED CT  | 707419009   | Osteoporosis due to cystic fibrosis      |
| SNOMED CT  | 897308007   | Chronic kidney disease with osteoporosis |

## 1.5 Anti-Diabetic Medications (ADMs)

### 1.5.1 Metformin

Table 16: Concept codes used to identify metformin medications.

| CodeSystem | ConceptCode | ConceptName                                                        |
|------------|-------------|--------------------------------------------------------------------|
| RxNorm     | 6809        | metformin                                                          |
| RxNorm     | 1243830     | Metformin / sitagliptin Extended Release Tablet [Janumet 100/1000] |
| RxNorm     | 1243847     | Metformin / sitagliptin Extended Release Tablet [Janumet 50/500]   |
| RxNorm     | 1243023     | Linagliptin / Metformin Oral Tablet [Jentaduetto 2.5/1000]         |
| RxNorm     | 1243030     | Linagliptin / Metformin Oral Tablet [Jentaduetto 2.5/500]          |
| RxNorm     | 340678      | Metformin 850 MG Extended Release Tablet                           |
| RxNorm     | 368567      | Glipizide / Metformin Oral Tablet [metaglip]                       |
| RxNorm     | 352301      | Glipizide 5 MG / Metformin 500 MG Oral Tablet [metaglip]           |
| RxNorm     | 352302      | Glipizide 2.5 MG / Metformin 250 MG Oral Tablet [metaglip]         |
| RxNorm     | 368169      | Glyburide / Metformin Oral Tablet [Glucovance]                     |
| RxNorm     | 352300      | Glipizide 2.5 MG / Metformin 500 MG Oral Tablet [metaglip]         |
| RxNorm     | 368568      | Metformin / rosiglitazone Oral Tablet [avandamet]                  |
| RxNorm     | 446358      | Metformin 12 hour Extended Release Tablet                          |
| RxNorm     | 404646      | Metformin 1000 MG / rosiglitazone 2 MG Oral Tablet [avandamet]     |
| RxNorm     | 352296      | Metformin 500 MG / rosiglitazone 4 MG Oral Tablet [avandamet]      |

Continued on next page

**Table16 – continued from previous page**

| CodeSystem | ConceptCode | ConceptName                                                      |
|------------|-------------|------------------------------------------------------------------|
| RxNorm     | 404647      | Metformin 1000 MG / rosiglitazone 4 MG Oral Tablet [avandamet]   |
| RxNorm     | 352294      | Metformin 500 MG / rosiglitazone 1 MG Oral Tablet [avandamet]    |
| RxNorm     | 375561      | Metformin 24 Hour Extended Release Tablet                        |
| RxNorm     | 369995      | Metformin Extended Release Tablet [Glucophage XR]                |
| RxNorm     | 284467      | Metformin 500 MG Extended Release Tablet [Glucophage XR]         |
| RxNorm     | 433928      | Metformin 750 MG 24 Hour Extended Release Tablet                 |
| RxNorm     | 404477      | Metformin 750 MG Extended Release Tablet [Glucophage XR]         |
| RxNorm     | 352295      | Metformin 500 MG / rosiglitazone 2 MG Oral Tablet [avandamet]    |
| RxNorm     | 575998      | Glipizide 2.5 MG / Metformin 250 MG [metaglip]                   |
| RxNorm     | 574900      | Metformin 500 MG [Glucophage XR]                                 |
| RxNorm     | 575996      | Glipizide 2.5 MG / Metformin 500 MG [metaglip]                   |
| RxNorm     | 541776      | Metformin 500 MG / ropinirole 2 MG [avandamet]                   |
| RxNorm     | 575991      | Metformin 500 MG / rosiglitazone 1 MG [avandamet]                |
| RxNorm     | 575993      | Metformin 500 MG / rosiglitazone 4 MG [avandamet]                |
| RxNorm     | 575992      | Metformin 500 MG / rosiglitazone 2 MG [avandamet]                |
| RxNorm     | 576550      | Metformin 1000 MG / rosiglitazone 4 MG [avandamet]               |
| RxNorm     | 576428      | Metformin 750 MG [Glucophage XR]                                 |
| RxNorm     | 541778      | Metformin 500 MG / ropinirole 2 MG Oral Tablet [avandamet]       |
| RxNorm     | 575997      | Glipizide 5 MG / Metformin 500 MG [metaglip]                     |
| RxNorm     | 576549      | Metformin 1000 MG / rosiglitazone 2 MG [avandamet]               |
| RxNorm     | 602413      | Metformin / pioglitazone Oral Tablet [Actoplus Met]              |
| RxNorm     | 705136      | Metformin 1000 MG / sitagliptin 50 MG Oral Tablet [Janumet]      |
| RxNorm     | 602416      | Metformin 850 MG / pioglitazone 15 MG Oral Tablet [Actoplus Met] |
| RxNorm     | 645111      | Metformin Oral Tablet [Glumetza]                                 |
| RxNorm     | 705134      | Metformin 1000 MG / sitagliptin 50 MG [Janumet]                  |
| RxNorm     | 705135      | Metformin / sitagliptin Oral Tablet [Janumet]                    |
| RxNorm     | 706114      | Metformin / rosiglitazone Oral Tablet [Avandamet]                |
| RxNorm     | 705138      | Metformin 500 MG / sitagliptin 50 MG Oral Tablet [Janumet]       |
| RxNorm     | 731425      | Metformin / pioglitazone Oral Tablet [Actoplus Met 15/850]       |
| RxNorm     | 748763      | Metformin 500 MG / sitagliptin 64.3 MG Oral Tablet               |
| RxNorm     | 602414      | Metformin 500 MG / pioglitazone 15 MG Oral Tablet [Actoplus Met] |
| RxNorm     | 757607      | Metformin / sitagliptin Oral Tablet [Janumet 50 mg/500 mg]       |

Continued on next page

**Table16 – continued from previous page**

| CodeSystem | ConceptCode | ConceptName                                                                             |
|------------|-------------|-----------------------------------------------------------------------------------------|
| RxNorm     | 602412      | Metformin 500 MG / pioglitazone 15 MG [Actoplus Met]                                    |
| RxNorm     | 759753      | Metformin / rosiglitazone Oral Tablet [Adandamet 2/500]                                 |
| RxNorm     | 759754      | Metformin 500 MG / rosiglitazone 2 MG Oral Tablet [Adandamet 2/500]                     |
| RxNorm     | 806291      | Metformin / rosiglitazone Oral Tablet [Avandamet 4/500]                                 |
| RxNorm     | 806295      | Metformin / rosiglitazone Oral Tablet [Avandamet 2/500]                                 |
| RxNorm     | 806283      | Metformin / rosiglitazone Oral Tablet [Avandamet 4/1000]                                |
| RxNorm     | 748765      | Metformin 500 MG / sitagliptin 64.3 MG Oral Tablet [Janumet]                            |
| RxNorm     | 805674      | Metformin / repaglinide Oral Tablet [PrandiMet 2/500]                                   |
| RxNorm     | 645112      | Metformin 500 MG Oral Tablet [Glumetza]                                                 |
| RxNorm     | 705137      | Metformin 500 MG / sitagliptin 50 MG [Janumet]                                          |
| RxNorm     | 759752      | Metformin 500 MG / rosiglitazone 2 MG [Adandamet 2/500]                                 |
| RxNorm     | 602415      | Metformin 850 MG / pioglitazone 15 MG [Actoplus Met]                                    |
| RxNorm     | 849593      | Glipizide / Metformin Oral Tablet [Metaglip 2.5 MG/500 MG]                              |
| RxNorm     | 748764      | Metformin 500 MG / sitagliptin 64.3 MG [Janumet]                                        |
| RxNorm     | 806275      | Metformin / rosiglitazone Oral Tablet [Avandamet 1/500]                                 |
| RxNorm     | 860996      | 24 HR Metformin hydrochloride 1000 MG Extended Release Oral Tablet                      |
| RxNorm     | 849589      | Glipizide / Metformin Oral Tablet [Metaglip 5 MG/500 MG]                                |
| RxNorm     | 861746      | Glyburide / Metformin Oral Tablet [Glucovance 1.25 MG/250 MG]                           |
| RxNorm     | 861751      | Glyburide / Metformin Oral Tablet [Glucovance 2.5 MG/500 MG]                            |
| RxNorm     | 899999      | Metformin / pioglitazone Extended Release Tablet [Actoplus Met 30/1000]                 |
| RxNorm     | 1043581     | Metformin / saxagliptin Extended Release Tablet [Kombiglyze 5/500]                      |
| RxNorm     | 1043573     | Metformin / saxagliptin Extended Release Tablet [Kombiglyze 5/1000]                     |
| RxNorm     | 1185627     | Metaglip 5 MG/500 MG Oral Product                                                       |
| RxNorm     | 1243031     | Jentadueto 2.5/500 Oral Product                                                         |
| RxNorm     | 1169924     | Actoplus Met 15/850 Oral Product                                                        |
| RxNorm     | 1243025     | Jentadueto 2.5/1000 Pill                                                                |
| RxNorm     | 1008476     | metformin / ropinirole                                                                  |
| RxNorm     | 1043561     | metformin / saxagliptin Extended Release Oral Tablet                                    |
| RxNorm     | 1043562     | metformin / saxagliptin                                                                 |
| RxNorm     | 1043563     | 24 HR metformin hydrochloride 1000 MG / saxagliptin 2.5 MG Extended Release Oral Tablet |

Continued on next page

**Table16 – continued from previous page**

| CodeSystem | ConceptCode | ConceptName                                                                                          |
|------------|-------------|------------------------------------------------------------------------------------------------------|
| RxNorm     | 1043565     | metformin hydrochloride 1000 MG / saxagliptin 2.5 MG [Kombiglyze]                                    |
| RxNorm     | 1043566     | metformin / saxagliptin Extended Release Oral Tablet [Kombiglyze]                                    |
| RxNorm     | 1043567     | 24 HR metformin hydrochloride 1000 MG / saxagliptin 2.5 MG Extended Release Oral Tablet [Kombiglyze] |
| RxNorm     | 1043568     | metformin hydrochloride 1000 MG / saxagliptin 2.5 MG Extended Release Oral Tablet                    |
| RxNorm     | 1043569     | metformin hydrochloride 1000 MG / saxagliptin 2.5 MG Extended Release Oral Tablet [Kombiglyze]       |
| RxNorm     | 1043570     | 24 HR metformin hydrochloride 1000 MG / saxagliptin 5 MG Extended Release Oral Tablet                |
| RxNorm     | 1043572     | metformin hydrochloride 1000 MG / saxagliptin 5 MG [Kombiglyze]                                      |
| RxNorm     | 1043574     | 24 HR metformin hydrochloride 1000 MG / saxagliptin 5 MG Extended Release Oral Tablet [Kombiglyze]   |
| RxNorm     | 1043575     | metformin hydrochloride 1000 MG / saxagliptin 5 MG Extended Release Oral Tablet                      |
| RxNorm     | 1043576     | metformin hydrochloride 1000 MG / saxagliptin 5 MG Extended Release Oral Tablet [Kombiglyze]         |
| RxNorm     | 1043578     | 24 HR metformin hydrochloride 500 MG / saxagliptin 5 MG Extended Release Oral Tablet                 |
| RxNorm     | 1043580     | metformin hydrochloride 500 MG / saxagliptin 5 MG [Kombiglyze]                                       |
| RxNorm     | 1043582     | 24 HR metformin hydrochloride 500 MG / saxagliptin 5 MG Extended Release Oral Tablet [Kombiglyze]    |
| RxNorm     | 1043583     | metformin hydrochloride 500 MG / saxagliptin 5 MG Extended Release Oral Tablet                       |
| RxNorm     | 1043584     | metformin hydrochloride 500 MG / saxagliptin 5 MG Extended Release Oral Tablet [Kombiglyze]          |
| RxNorm     | 105376      | metformin hydrochloride 500 MG Oral Tablet [Glucamet]                                                |
| RxNorm     | 105377      | metformin hydrochloride 850 MG Oral Tablet [Glucamet]                                                |
| RxNorm     | 1156197     | glyburide / metformin Pill                                                                           |
| RxNorm     | 1155467     | chlorpropamide / metformin Oral Product                                                              |
| RxNorm     | 1155468     | chlorpropamide / metformin Pill                                                                      |
| RxNorm     | 1161597     | metformin / pioglitazone Oral Product                                                                |
| RxNorm     | 1161598     | metformin / pioglitazone Pill                                                                        |
| RxNorm     | 1161599     | metformin / repaglinide Oral Product                                                                 |
| RxNorm     | 1161600     | metformin / repaglinide Pill                                                                         |
| RxNorm     | 1161601     | metformin / ropinirole Oral Product                                                                  |
| RxNorm     | 1161602     | metformin / ropinirole Pill                                                                          |
| RxNorm     | 1161603     | metformin / rosiglitazone Oral Product                                                               |
| RxNorm     | 1161604     | metformin / rosiglitazone Pill                                                                       |

Continued on next page

**Table16 – continued from previous page**

| CodeSystem | ConceptCode | ConceptName                          |
|------------|-------------|--------------------------------------|
| RxNorm     | 1161605     | metformin / saxagliptin Oral Product |
| RxNorm     | 1161606     | metformin / saxagliptin Pill         |
| RxNorm     | 1161607     | metformin / sitagliptin Oral Product |
| RxNorm     | 1161608     | metformin / sitagliptin Pill         |
| RxNorm     | 1161609     | metformin Oral Liquid Product        |
| RxNorm     | 1161610     | metformin Oral Product               |
| RxNorm     | 1161611     | metformin Pill                       |
| RxNorm     | 1165205     | glipizide / metformin Oral Product   |
| RxNorm     | 1165206     | glipizide / metformin Pill           |
| RxNorm     | 1165845     | glyburide / metformin Oral Product   |
| RxNorm     | 1171242     | Glucamet Oral Product                |
| RxNorm     | 1171243     | Glucamet Pill                        |
| RxNorm     | 1171244     | Glucophage Oral Product              |
| RxNorm     | 1171245     | Glucophage Pill                      |
| RxNorm     | 1171248     | Glucovance Oral Product              |
| RxNorm     | 1171249     | Glucovance Pill                      |
| RxNorm     | 1171254     | Glumetza Oral Product                |
| RxNorm     | 1171255     | Glumetza Pill                        |
| RxNorm     | 1169920     | Actoplus Met Oral Product            |
| RxNorm     | 1169923     | Actoplus Met Pill                    |
| RxNorm     | 1175016     | Avandamet Oral Product               |
| RxNorm     | 1175021     | Avandamet Pill                       |
| RxNorm     | 1172629     | Fortamet Oral Product                |
| RxNorm     | 1172630     | Fortamet Pill                        |
| RxNorm     | 1172860     | Kombiglyze Pill                      |
| RxNorm     | 1172861     | Kombiglyze Oral Product              |
| RxNorm     | 1167810     | Janumet Oral Product                 |
| RxNorm     | 1167811     | Janumet Pill                         |
| RxNorm     | 1184627     | PrandiMet Oral Product               |
| RxNorm     | 1184628     | PrandiMet Pill                       |
| RxNorm     | 1182890     | Orabet Metformin Oral Product        |
| RxNorm     | 1182891     | Orabet Metformin Pill                |
| RxNorm     | 1185049     | Metaglip Oral Product                |
| RxNorm     | 1185325     | Riomet Oral Liquid Product           |
| RxNorm     | 1185326     | Riomet Oral Product                  |
| RxNorm     | 1185624     | Metaglip Pill                        |
| RxNorm     | 1185653     | Metforming Oral Product              |
| RxNorm     | 1185654     | Metforming Pill                      |
| RxNorm     | 1243016     | linagliptin / metformin Oral Product |
| RxNorm     | 1243017     | linagliptin / metformin Pill         |
| RxNorm     | 1243018     | linagliptin / metformin Oral Tablet  |
| RxNorm     | 1243019     | linagliptin / metformin              |

Continued on next page

**Table16 – continued from previous page**

| CodeSystem | ConceptCode | ConceptName                                                                                       |
|------------|-------------|---------------------------------------------------------------------------------------------------|
| RxNorm     | 1243020     | linagliptin 2.5 MG / metformin hydrochloride 1000 MG Oral Tablet                                  |
| RxNorm     | 1243022     | linagliptin 2.5 MG / metformin hydrochloride 1000 MG [Jentadueto]                                 |
| RxNorm     | 1243026     | linagliptin 2.5 MG / metformin hydrochloride 1000 MG Oral Tablet [Jentadueto]                     |
| RxNorm     | 1243027     | linagliptin 2.5 MG / metformin hydrochloride 500 MG Oral Tablet                                   |
| RxNorm     | 1243029     | linagliptin 2.5 MG / metformin hydrochloride 500 MG [Jentadueto]                                  |
| RxNorm     | 1243033     | linagliptin 2.5 MG / metformin hydrochloride 500 MG Oral Tablet [Jentadueto]                      |
| RxNorm     | 1243034     | linagliptin 2.5 MG / metformin hydrochloride 850 MG Oral Tablet                                   |
| RxNorm     | 1243036     | linagliptin 2.5 MG / metformin hydrochloride 850 MG [Jentadueto]                                  |
| RxNorm     | 1243037     | linagliptin / metformin Oral Tablet [Jentadueto]                                                  |
| RxNorm     | 1243038     | Jentadueto Oral Product                                                                           |
| RxNorm     | 1243039     | Jentadueto Pill                                                                                   |
| RxNorm     | 1243040     | linagliptin 2.5 MG / metformin hydrochloride 850 MG Oral Tablet [Jentadueto]                      |
| RxNorm     | 1243826     | metformin / sitagliptin Extended Release Oral Tablet                                              |
| RxNorm     | 1243827     | 24 HR metformin hydrochloride 1000 MG / sitagliptin 100 MG Extended Release Oral Tablet           |
| RxNorm     | 1243829     | metformin hydrochloride 1000 MG / sitagliptin 100 MG [Janumet]                                    |
| RxNorm     | 1243833     | 24 HR metformin hydrochloride 1000 MG / sitagliptin 100 MG Extended Release Oral Tablet [Janumet] |
| RxNorm     | 1243834     | metformin hydrochloride 1000 MG / sitagliptin 100 MG Extended Release Oral Tablet                 |
| RxNorm     | 1243835     | metformin hydrochloride 1000 MG / sitagliptin 100 MG Extended Release Oral Tablet [Janumet]       |
| RxNorm     | 1243839     | metformin / sitagliptin Extended Release Oral Tablet [Janumet]                                    |
| RxNorm     | 1243842     | 24 HR metformin hydrochloride 1000 MG / sitagliptin 50 MG Extended Release Oral Tablet            |
| RxNorm     | 1243843     | 24 HR metformin hydrochloride 1000 MG / sitagliptin 50 MG Extended Release Oral Tablet [Janumet]  |
| RxNorm     | 1243844     | metformin hydrochloride 1000 MG / sitagliptin 50 MG Extended Release Oral Tablet                  |
| RxNorm     | 1243845     | metformin hydrochloride 1000 MG / sitagliptin 50 MG Extended Release Oral Tablet [Janumet]        |

Continued on next page



**Table16 – continued from previous page**

| CodeSystem | ConceptCode | ConceptName                                                                                     |
|------------|-------------|-------------------------------------------------------------------------------------------------|
| RxNorm     | 1243846     | 24 HR metformin hydrochloride 500 MG / sitagliptin 50 MG Extended Release Oral Tablet           |
| RxNorm     | 1243848     | 24 HR metformin hydrochloride 500 MG / sitagliptin 50 MG Extended Release Oral Tablet [Janumet] |
| RxNorm     | 1243849     | metformin hydrochloride 500 MG / sitagliptin 50 MG Extended Release Oral Tablet                 |
| RxNorm     | 1243850     | metformin hydrochloride 500 MG / sitagliptin 50 MG Extended Release Oral Tablet [Janumet]       |
| RxNorm     | 1368381     | alogliptin / metformin Oral Product                                                             |
| RxNorm     | 1368382     | alogliptin / metformin Pill                                                                     |
| RxNorm     | 1368383     | alogliptin / metformin Oral Tablet                                                              |
| RxNorm     | 1368384     | alogliptin / metformin                                                                          |
| RxNorm     | 1368385     | alogliptin 12.5 MG / metformin hydrochloride 1000 MG Oral Tablet                                |
| RxNorm     | 1368387     | alogliptin 12.5 MG / metformin hydrochloride 1000 MG [Kazano]                                   |
| RxNorm     | 1368391     | alogliptin 12.5 MG / metformin hydrochloride 1000 MG Oral Tablet [Kazano]                       |
| RxNorm     | 1368392     | alogliptin 12.5 MG / metformin hydrochloride 500 MG Oral Tablet                                 |
| RxNorm     | 1368394     | alogliptin 12.5 MG / metformin hydrochloride 500 MG [Kazano]                                    |
| RxNorm     | 1368395     | alogliptin / metformin Oral Tablet [Kazano]                                                     |
| RxNorm     | 1368396     | Kazano Oral Product                                                                             |
| RxNorm     | 1368397     | Kazano Pill                                                                                     |
| RxNorm     | 1368398     | alogliptin 12.5 MG / metformin hydrochloride 500 MG Oral Tablet [Kazano]                        |
| RxNorm     | 1372692     | Kazano                                                                                          |
| RxNorm     | 1372706     | Jentadueto                                                                                      |
| RxNorm     | 1372716     | PrandiMet                                                                                       |
| RxNorm     | 1372730     | Kombiglyze                                                                                      |
| RxNorm     | 1372738     | Janumet                                                                                         |
| RxNorm     | 1486436     | dapagliflozin / metformin                                                                       |
| RxNorm     | 151825      | Glucamet                                                                                        |
| RxNorm     | 151827      | Glucophage                                                                                      |
| RxNorm     | 1545146     | canagliflozin / metformin Oral Product                                                          |
| RxNorm     | 1545147     | canagliflozin / metformin Pill                                                                  |
| RxNorm     | 1545148     | canagliflozin / metformin Oral Tablet                                                           |
| RxNorm     | 1545149     | canagliflozin / metformin                                                                       |
| RxNorm     | 1545150     | canagliflozin 150 MG / metformin hydrochloride 1000 MG Oral Tablet                              |
| RxNorm     | 1545151     | Invokamet                                                                                       |

Continued on next page

**Table16 – continued from previous page**

| CodeSystem | ConceptCode | ConceptName                                                                              |
|------------|-------------|------------------------------------------------------------------------------------------|
| RxNorm     | 1545152     | canagliflozin 150 MG / metformin hydrochloride 1000 MG [Invokamet]                       |
| RxNorm     | 1545153     | canagliflozin / metformin Oral Tablet [Invokamet]                                        |
| RxNorm     | 1545154     | Invokamet Oral Product                                                                   |
| RxNorm     | 1545155     | Invokamet Pill                                                                           |
| RxNorm     | 1545156     | canagliflozin 150 MG / metformin hydrochloride 1000 MG Oral Tablet [Invokamet]           |
| RxNorm     | 1545157     | canagliflozin 150 MG / metformin hydrochloride 500 MG Oral Tablet                        |
| RxNorm     | 1545158     | canagliflozin 150 MG / metformin hydrochloride 500 MG [Invokamet]                        |
| RxNorm     | 1545159     | canagliflozin 150 MG / metformin hydrochloride 500 MG Oral Tablet [Invokamet]            |
| RxNorm     | 1545161     | canagliflozin 50 MG / metformin hydrochloride 1000 MG Oral Tablet                        |
| RxNorm     | 1545162     | canagliflozin 50 MG / metformin hydrochloride 1000 MG [Invokamet]                        |
| RxNorm     | 1545163     | canagliflozin 50 MG / metformin hydrochloride 1000 MG Oral Tablet [Invokamet]            |
| RxNorm     | 1545164     | canagliflozin 50 MG / metformin hydrochloride 500 MG Oral Tablet                         |
| RxNorm     | 1545165     | canagliflozin 50 MG / metformin hydrochloride 500 MG [Invokamet]                         |
| RxNorm     | 1545166     | canagliflozin 50 MG / metformin hydrochloride 500 MG Oral Tablet [Invokamet]             |
| RxNorm     | 152161      | Orabet Metformin                                                                         |
| RxNorm     | 1593057     | dapagliflozin / metformin Extended Release Oral Tablet                                   |
| RxNorm     | 1593058     | 24 HR dapagliflozin 10 MG / metformin hydrochloride 1000 MG Extended Release Oral Tablet |
| RxNorm     | 1593059     | dapagliflozin 10 MG / metformin hydrochloride 1000 MG Extended Release Oral Tablet       |
| RxNorm     | 1593068     | 24 HR dapagliflozin 10 MG / metformin hydrochloride 500 MG Extended Release Oral Tablet  |
| RxNorm     | 1593069     | dapagliflozin 10 MG / metformin hydrochloride 500 MG Extended Release Oral Tablet        |
| RxNorm     | 1593070     | 24 HR dapagliflozin 5 MG / metformin hydrochloride 1000 MG Extended Release Oral Tablet  |
| RxNorm     | 1593071     | dapagliflozin 5 MG / metformin hydrochloride 1000 MG Extended Release Oral Tablet        |
| RxNorm     | 1593072     | 24 HR dapagliflozin 5 MG / metformin hydrochloride 500 MG Extended Release Oral Tablet   |
| RxNorm     | 1593073     | dapagliflozin 5 MG / metformin hydrochloride 500 MG Extended Release Oral Tablet         |

Continued on next page

**Table16 – continued from previous page**

| CodeSystem | ConceptCode | ConceptName                                                                                       |
|------------|-------------|---------------------------------------------------------------------------------------------------|
| RxNorm     | 1593774     | dapagliflozin / metformin Extended Release Oral Tablet [Xigduo]                                   |
| RxNorm     | 1593775     | 24 HR dapagliflozin 10 MG / metformin hydrochloride 1000 MG Extended Release Oral Tablet [Xigduo] |
| RxNorm     | 1593776     | dapagliflozin 10 MG / metformin hydrochloride 1000 MG Extended Release Oral Tablet [Xigduo]       |
| RxNorm     | 1593826     | dapagliflozin 10 MG / metformin hydrochloride 500 MG [Xigduo]                                     |
| RxNorm     | 1593827     | dapagliflozin 10 MG / metformin hydrochloride 500 MG Extended Release Oral Tablet [Xigduo]        |
| RxNorm     | 1593828     | dapagliflozin 5 MG / metformin hydrochloride 1000 MG [Xigduo]                                     |
| RxNorm     | 1593829     | dapagliflozin 5 MG / metformin hydrochloride 1000 MG Extended Release Oral Tablet [Xigduo]        |
| RxNorm     | 1593830     | dapagliflozin 5 MG / metformin hydrochloride 500 MG [Xigduo]                                      |
| RxNorm     | 1593831     | 24 HR dapagliflozin 5 MG / metformin hydrochloride 500 MG Extended Release Oral Tablet [Xigduo]   |
| RxNorm     | 1593832     | dapagliflozin 5 MG / metformin hydrochloride 500 MG Extended Release Oral Tablet [Xigduo]         |
| RxNorm     | 1593833     | 24 HR dapagliflozin 5 MG / metformin hydrochloride 1000 MG Extended Release Oral Tablet [Xigduo]  |
| RxNorm     | 1593835     | 24 HR dapagliflozin 10 MG / metformin hydrochloride 500 MG Extended Release Oral Tablet [Xigduo]  |
| RxNorm     | 1592709     | dapagliflozin / metformin Oral Product                                                            |
| RxNorm     | 1592710     | dapagliflozin / metformin Pill                                                                    |
| RxNorm     | 1592713     | Xigduo                                                                                            |
| RxNorm     | 1592716     | Xigduo Oral Product                                                                               |
| RxNorm     | 1592717     | Xigduo Pill                                                                                       |
| RxNorm     | 1592722     | dapagliflozin 10 MG / metformin hydrochloride 1000 MG [Xigduo]                                    |
| RxNorm     | 1664311     | empagliflozin / metformin Oral Product                                                            |
| RxNorm     | 1664312     | empagliflozin / metformin Pill                                                                    |
| RxNorm     | 1664313     | empagliflozin / metformin Oral Tablet                                                             |
| RxNorm     | 1664314     | empagliflozin / metformin                                                                         |
| RxNorm     | 1664315     | empagliflozin 5 MG / metformin hydrochloride 500 MG Oral Tablet                                   |
| RxNorm     | 1664316     | Synjardy                                                                                          |
| RxNorm     | 1664317     | empagliflozin 5 MG / metformin hydrochloride 500 MG [Synjardy]                                    |
| RxNorm     | 1664318     | empagliflozin / metformin Oral Tablet [Synjardy]                                                  |
| RxNorm     | 1664319     | Synjardy Oral Product                                                                             |
| RxNorm     | 1664320     | Synjardy Pill                                                                                     |

Continued on next page

**Table16 – continued from previous page**

| CodeSystem | ConceptCode | ConceptName                                                                                          |
|------------|-------------|------------------------------------------------------------------------------------------------------|
| RxNorm     | 1664321     | empagliflozin 5 MG / metformin hydrochloride 500 MG Oral Tablet [Synjardy]                           |
| RxNorm     | 1664323     | empagliflozin 12.5 MG / metformin hydrochloride 500 MG Oral Tablet                                   |
| RxNorm     | 1664324     | empagliflozin 12.5 MG / metformin hydrochloride 500 MG [Synjardy]                                    |
| RxNorm     | 1664325     | empagliflozin 12.5 MG / metformin hydrochloride 500 MG Oral Tablet [Synjardy]                        |
| RxNorm     | 1664326     | empagliflozin 5 MG / metformin hydrochloride 1000 MG Oral Tablet                                     |
| RxNorm     | 1664327     | empagliflozin 5 MG / metformin hydrochloride 1000 MG [Synjardy]                                      |
| RxNorm     | 1664328     | empagliflozin 5 MG / metformin hydrochloride 1000 MG Oral Tablet [Synjardy]                          |
| RxNorm     | 1665367     | empagliflozin 12.5 MG / metformin hydrochloride 1000 MG Oral Tablet                                  |
| RxNorm     | 1665368     | empagliflozin 12.5 MG / metformin hydrochloride 1000 MG [Synjardy]                                   |
| RxNorm     | 1665369     | empagliflozin 12.5 MG / metformin hydrochloride 1000 MG Oral Tablet [Synjardy]                       |
| RxNorm     | 1796088     | linagliptin / metformin Extended Release Oral Tablet                                                 |
| RxNorm     | 1796089     | 24 HR linagliptin 2.5 MG / metformin hydrochloride 1000 MG Extended Release Oral Tablet              |
| RxNorm     | 1796090     | linagliptin / metformin Extended Release Oral Tablet [Jentadueto]                                    |
| RxNorm     | 1796091     | 24 HR linagliptin 2.5 MG / metformin hydrochloride 1000 MG Extended Release Oral Tablet [Jentadueto] |
| RxNorm     | 1796092     | linagliptin 2.5 MG / metformin hydrochloride 1000 MG Extended Release Oral Tablet                    |
| RxNorm     | 1796093     | linagliptin 2.5 MG / metformin hydrochloride 1000 MG Extended Release Oral Tablet [Jentadueto]       |
| RxNorm     | 1796094     | 24 HR linagliptin 5 MG / metformin hydrochloride 1000 MG Extended Release Oral Tablet                |
| RxNorm     | 1796095     | linagliptin 5 MG / metformin hydrochloride 1000 MG [Jentadueto]                                      |
| RxNorm     | 1796096     | 24 HR linagliptin 5 MG / metformin hydrochloride 1000 MG Extended Release Oral Tablet [Jentadueto]   |
| RxNorm     | 1796097     | linagliptin 5 MG / metformin hydrochloride 1000 MG Extended Release Oral Tablet                      |
| RxNorm     | 1796098     | linagliptin 5 MG / metformin hydrochloride 1000 MG Extended Release Oral Tablet [Jentadueto]         |
| RxNorm     | 1807888     | Modified 24 HR metformin hydrochloride 1000 MG Extended Release Oral Tablet                          |

Continued on next page

**Table16 – continued from previous page**

| CodeSystem | ConceptCode | ConceptName                                                                                           |
|------------|-------------|-------------------------------------------------------------------------------------------------------|
| RxNorm     | 1807894     | Osmotic 24 HR metformin hydrochloride 1000 MG Extended Release Oral Tablet                            |
| RxNorm     | 1807915     | Modified 24 HR metformin hydrochloride 500 MG Extended Release Oral Tablet                            |
| RxNorm     | 1807917     | Osmotic 24 HR metformin hydrochloride 500 MG Extended Release Oral Tablet                             |
| RxNorm     | 1810996     | canagliflozin / metformin Extended Release Oral Tablet                                                |
| RxNorm     | 1810997     | 24 HR canagliflozin 150 MG / metformin hydrochloride 1000 MG Extended Release Oral Tablet             |
| RxNorm     | 1810998     | canagliflozin / metformin Extended Release Oral Tablet [Invokamet]                                    |
| RxNorm     | 1810999     | 24 HR canagliflozin 150 MG / metformin hydrochloride 1000 MG Extended Release Oral Tablet [Invokamet] |
| RxNorm     | 1811000     | canagliflozin 150 MG / metformin hydrochloride 1000 MG Extended Release Oral Tablet                   |
| RxNorm     | 1811001     | canagliflozin 150 MG / metformin hydrochloride 1000 MG Extended Release Oral Tablet [Invokamet]       |
| RxNorm     | 1811002     | 24 HR canagliflozin 150 MG / metformin hydrochloride 500 MG Extended Release Oral Tablet              |
| RxNorm     | 1811003     | 24 HR canagliflozin 150 MG / metformin hydrochloride 500 MG Extended Release Oral Tablet [Invokamet]  |
| RxNorm     | 1811004     | canagliflozin 150 MG / metformin hydrochloride 500 MG Extended Release Oral Tablet                    |
| RxNorm     | 1811005     | canagliflozin 150 MG / metformin hydrochloride 500 MG Extended Release Oral Tablet [Invokamet]        |
| RxNorm     | 1811006     | 24 HR canagliflozin 50 MG / metformin hydrochloride 1000 MG Extended Release Oral Tablet              |
| RxNorm     | 1811007     | 24 HR canagliflozin 50 MG / metformin hydrochloride 1000 MG Extended Release Oral Tablet [Invokamet]  |
| RxNorm     | 1862684     | empagliflozin / metformin Extended Release Oral Tablet                                                |
| RxNorm     | 1862685     | 24 HR empagliflozin 10 MG / metformin hydrochloride 1000 MG Extended Release Oral Tablet              |
| RxNorm     | 1862686     | empagliflozin 10 MG / metformin hydrochloride 1000 MG [Synjardy]                                      |
| RxNorm     | 1862687     | empagliflozin / metformin Extended Release Oral Tablet [Synjardy]                                     |
| RxNorm     | 1862688     | 24 HR empagliflozin 10 MG / metformin hydrochloride 1000 MG Extended Release Oral Tablet [Synjardy]   |
| RxNorm     | 1862689     | empagliflozin 10 MG / metformin hydrochloride 1000 MG Extended Release Oral Tablet                    |
| RxNorm     | 1862690     | empagliflozin 10 MG / metformin hydrochloride 1000 MG Extended Release Oral Tablet [Synjardy]         |

Continued on next page

**Table16 – continued from previous page**

| CodeSystem | ConceptCode | ConceptName                                                                                           |
|------------|-------------|-------------------------------------------------------------------------------------------------------|
| RxNorm     | 1862691     | 24 HR empagliflozin 12.5 MG / metformin hydrochloride 1000 MG Extended Release Oral Tablet            |
| RxNorm     | 1862692     | 24 HR empagliflozin 12.5 MG / metformin hydrochloride 1000 MG Extended Release Oral Tablet [Synjardy] |
| RxNorm     | 1862693     | empagliflozin 12.5 MG / metformin hydrochloride 1000 MG Extended Release Oral Tablet                  |
| RxNorm     | 1811008     | canagliflozin 50 MG / metformin hydrochloride 1000 MG Extended Release Oral Tablet                    |
| RxNorm     | 1811009     | canagliflozin 50 MG / metformin hydrochloride 1000 MG Extended Release Oral Tablet [Invokamet]        |
| RxNorm     | 1811010     | 24 HR canagliflozin 50 MG / metformin hydrochloride 500 MG Extended Release Oral Tablet               |
| RxNorm     | 1811011     | 24 HR canagliflozin 50 MG / metformin hydrochloride 500 MG Extended Release Oral Tablet [Invokamet]   |
| RxNorm     | 1811012     | canagliflozin 50 MG / metformin hydrochloride 500 MG Extended Release Oral Tablet                     |
| RxNorm     | 1811013     | canagliflozin 50 MG / metformin hydrochloride 500 MG Extended Release Oral Tablet [Invokamet]         |
| RxNorm     | 1862694     | empagliflozin 12.5 MG / metformin hydrochloride 1000 MG Extended Release Oral Tablet [Synjardy]       |
| RxNorm     | 1862695     | 24 HR empagliflozin 25 MG / metformin hydrochloride 1000 MG Extended Release Oral Tablet              |
| RxNorm     | 1862696     | empagliflozin 25 MG / metformin hydrochloride 1000 MG [Synjardy]                                      |
| RxNorm     | 1862697     | 24 HR empagliflozin 25 MG / metformin hydrochloride 1000 MG Extended Release Oral Tablet [Synjardy]   |
| RxNorm     | 1862698     | empagliflozin 25 MG / metformin hydrochloride 1000 MG Extended Release Oral Tablet                    |
| RxNorm     | 1862699     | empagliflozin 25 MG / metformin hydrochloride 1000 MG Extended Release Oral Tablet [Synjardy]         |
| RxNorm     | 1862700     | 24 HR empagliflozin 5 MG / metformin hydrochloride 1000 MG Extended Release Oral Tablet               |
| RxNorm     | 1862701     | 24 HR empagliflozin 5 MG / metformin hydrochloride 1000 MG Extended Release Oral Tablet [Synjardy]    |
| RxNorm     | 1862702     | empagliflozin 5 MG / metformin hydrochloride 1000 MG Extended Release Oral Tablet                     |
| RxNorm     | 1862703     | empagliflozin 5 MG / metformin hydrochloride 1000 MG Extended Release Oral Tablet [Synjardy]          |
| RxNorm     | 1940496     | 24 HR dapagliflozin 2.5 MG / metformin hydrochloride 1000 MG Extended Release Oral Tablet             |
| RxNorm     | 1940497     | dapagliflozin 2.5 MG / metformin hydrochloride 1000 MG [Xigduo]                                       |

Continued on next page

**Table16 – continued from previous page**

| CodeSystem | ConceptCode | ConceptName                                                                                        |
|------------|-------------|----------------------------------------------------------------------------------------------------|
| RxNorm     | 1940498     | 24 HR dapagliflozin 2.5 MG / metformin hydrochloride 1000 MG Extended Release Oral Tablet [Xigduo] |
| RxNorm     | 1940499     | dapagliflozin 2.5 MG / metformin hydrochloride 1000 MG Extended Release Oral Tablet                |
| RxNorm     | 1940500     | dapagliflozin 2.5 MG / metformin hydrochloride 1000 MG Extended Release Oral Tablet [Xigduo]       |
| RxNorm     | 1992681     | ertugliflozin / metformin Oral Product                                                             |
| RxNorm     | 1992682     | ertugliflozin / metformin Pill                                                                     |
| RxNorm     | 1992683     | ertugliflozin / metformin Oral Tablet                                                              |
| RxNorm     | 1992684     | ertugliflozin / metformin                                                                          |
| RxNorm     | 1992685     | ertugliflozin 2.5 MG / metformin hydrochloride 1000 MG Oral Tablet                                 |
| RxNorm     | 1992686     | Segluromet                                                                                         |
| RxNorm     | 1992687     | ertugliflozin 2.5 MG / metformin hydrochloride 1000 MG [Segluromet]                                |
| RxNorm     | 1992688     | ertugliflozin / metformin Oral Tablet [Segluromet]                                                 |
| RxNorm     | 1992689     | Segluromet Oral Product                                                                            |
| RxNorm     | 1992690     | Segluromet Pill                                                                                    |
| RxNorm     | 1992691     | ertugliflozin 2.5 MG / metformin hydrochloride 1000 MG Oral Tablet [Segluromet]                    |
| RxNorm     | 1992693     | ertugliflozin 2.5 MG / metformin hydrochloride 500 MG Oral Tablet                                  |
| RxNorm     | 1992694     | ertugliflozin 2.5 MG / metformin hydrochloride 500 MG [Segluromet]                                 |
| RxNorm     | 1992695     | ertugliflozin 2.5 MG / metformin hydrochloride 500 MG Oral Tablet [Segluromet]                     |
| RxNorm     | 1992698     | ertugliflozin 7.5 MG / metformin hydrochloride 1000 MG Oral Tablet                                 |
| RxNorm     | 1992699     | ertugliflozin 7.5 MG / metformin hydrochloride 1000 MG [Segluromet]                                |
| RxNorm     | 1992700     | ertugliflozin 7.5 MG / metformin hydrochloride 1000 MG Oral Tablet [Segluromet]                    |
| RxNorm     | 1992701     | ertugliflozin 7.5 MG / metformin hydrochloride 500 MG Oral Tablet                                  |
| RxNorm     | 1992702     | ertugliflozin 7.5 MG / metformin hydrochloride 500 MG [Segluromet]                                 |
| RxNorm     | 1992703     | ertugliflozin 7.5 MG / metformin hydrochloride 500 MG Oral Tablet [Segluromet]                     |
| RxNorm     | 204045      | metformin hydrochloride 500 MG Oral Tablet [Orabet Metformin]                                      |
| RxNorm     | 204047      | metformin hydrochloride 850 MG Oral Tablet [Orabet Metformin]                                      |
| RxNorm     | 2117292     | dapagliflozin / metformin / saxagliptin                                                            |

Continued on next page

**Table16 – continued from previous page**

| CodeSystem | ConceptCode | ConceptName                                                                  |
|------------|-------------|------------------------------------------------------------------------------|
| RxNorm     | 802051      | metformin Extended Release Oral Tablet [Glucophage]                          |
| RxNorm     | 802646      | metformin / repaglinide                                                      |
| RxNorm     | 802742      | metformin / repaglinide Oral Tablet                                          |
| RxNorm     | 849585      | glipizide / metformin Oral Tablet [Metaglip]                                 |
| RxNorm     | 805670      | metformin / repaglinide Oral Tablet [PrandiMet]                              |
| RxNorm     | 806287      | metformin / rosiglitazone Oral Tablet [Avandamet]                            |
| RxNorm     | 861730      | metformin hydrochloride 250 MG                                               |
| RxNorm     | 861731      | glipizide 2.5 MG / metformin hydrochloride 250 MG Oral Tablet                |
| RxNorm     | 861732      | glipizide 2.5 MG / metformin hydrochloride 250 MG [Metaglip]                 |
| RxNorm     | 861733      | glipizide 2.5 MG / metformin hydrochloride 250 MG Oral Tablet [Metaglip]     |
| RxNorm     | 861736      | glipizide 2.5 MG / metformin hydrochloride 500 MG Oral Tablet                |
| RxNorm     | 861737      | glipizide 2.5 MG / metformin hydrochloride 500 MG [Metaglip]                 |
| RxNorm     | 861738      | glipizide 2.5 MG / metformin hydrochloride 500 MG Oral Tablet [Metaglip]     |
| RxNorm     | 861740      | glipizide 5 MG / metformin hydrochloride 500 MG Oral Tablet                  |
| RxNorm     | 861741      | glipizide 5 MG / metformin hydrochloride 500 MG [Metaglip]                   |
| RxNorm     | 861742      | glipizide 5 MG / metformin hydrochloride 500 MG Oral Tablet [Metaglip]       |
| RxNorm     | 861743      | glyburide 1.25 MG / metformin hydrochloride 250 MG Oral Tablet               |
| RxNorm     | 861745      | glyburide 1.25 MG / metformin hydrochloride 250 MG [Glucoavance]             |
| RxNorm     | 861747      | glyburide 1.25 MG / metformin hydrochloride 250 MG Oral Tablet [Glucoavance] |
| RxNorm     | 861748      | glyburide 2.5 MG / metformin hydrochloride 500 MG Oral Tablet                |
| RxNorm     | 861750      | glyburide 2.5 MG / metformin hydrochloride 500 MG [Glucoavance]              |
| RxNorm     | 861752      | glyburide 2.5 MG / metformin hydrochloride 500 MG Oral Tablet [Glucoavance]  |
| RxNorm     | 861753      | glyburide 5 MG / metformin hydrochloride 500 MG Oral Tablet                  |
| RxNorm     | 861755      | glyburide 5 MG / metformin hydrochloride 500 MG [Glucoavance]                |
| RxNorm     | 861756      | glyburide / metformin Oral Tablet [Glucoavance]                              |

Continued on next page



**Table16 – continued from previous page**

| CodeSystem | ConceptCode | ConceptName                                                                    |
|------------|-------------|--------------------------------------------------------------------------------|
| RxNorm     | 861757      | glyburide 5 MG / metformin hydrochloride 500 MG Oral Tablet [Glucovance]       |
| RxNorm     | 861760      | metformin hydrochloride 1000 MG / rosiglitazone 2 MG Oral Tablet               |
| RxNorm     | 861761      | metformin hydrochloride 1000 MG / rosiglitazone 2 MG [Avandamet]               |
| RxNorm     | 861762      | metformin hydrochloride 1000 MG / rosiglitazone 2 MG Oral Tablet [Avandamet]   |
| RxNorm     | 861763      | metformin hydrochloride 1000 MG / rosiglitazone 4 MG Oral Tablet               |
| RxNorm     | 861764      | metformin hydrochloride 1000 MG / rosiglitazone 4 MG [Avandamet]               |
| RxNorm     | 875864      | metformin hydrochloride 500 MG [Glucamet]                                      |
| RxNorm     | 875865      | metformin hydrochloride 850 MG [Glucamet]                                      |
| RxNorm     | 861765      | metformin hydrochloride 1000 MG / rosiglitazone 4 MG Oral Tablet [Avandamet]   |
| RxNorm     | 861769      | metformin hydrochloride 1000 MG / sitagliptin 50 MG Oral Tablet                |
| RxNorm     | 861770      | metformin hydrochloride 1000 MG / sitagliptin 50 MG [Janumet]                  |
| RxNorm     | 861771      | metformin hydrochloride 1000 MG / sitagliptin 50 MG Oral Tablet [Janumet]      |
| RxNorm     | 861783      | metformin hydrochloride 500 MG / pioglitazone 15 MG Oral Tablet                |
| RxNorm     | 861784      | metformin hydrochloride 500 MG / pioglitazone 15 MG [Actoplus Met]             |
| RxNorm     | 861785      | metformin hydrochloride 500 MG / pioglitazone 15 MG Oral Tablet [Actoplus Met] |
| RxNorm     | 861787      | metformin hydrochloride 500 MG / repaglinide 1 MG Oral Tablet                  |
| RxNorm     | 861788      | metformin hydrochloride 500 MG / repaglinide 1 MG [PrandiMet]                  |
| RxNorm     | 861789      | metformin hydrochloride 500 MG / repaglinide 1 MG Oral Tablet [PrandiMet]      |
| RxNorm     | 861790      | metformin hydrochloride 500 MG / repaglinide 2 MG Oral Tablet                  |
| RxNorm     | 861791      | metformin hydrochloride 500 MG / repaglinide 2 MG [PrandiMet]                  |
| RxNorm     | 861792      | metformin hydrochloride 500 MG / repaglinide 2 MG Oral Tablet [PrandiMet]      |
| RxNorm     | 861795      | metformin hydrochloride 500 MG / rosiglitazone 1 MG Oral Tablet                |

Continued on next page

**Table16 – continued from previous page**

| CodeSystem | ConceptCode | ConceptName                                                                    |
|------------|-------------|--------------------------------------------------------------------------------|
| RxNorm     | 861796      | metformin hydrochloride 500 MG / rosiglitazone 1 MG [Avandamet]                |
| RxNorm     | 861797      | metformin hydrochloride 500 MG / rosiglitazone 1 MG Oral Tablet [Avandamet]    |
| RxNorm     | 861806      | metformin hydrochloride 500 MG / rosiglitazone 2 MG Oral Tablet                |
| RxNorm     | 861807      | metformin hydrochloride 500 MG / rosiglitazone 2 MG [Avandamet]                |
| RxNorm     | 861808      | metformin hydrochloride 500 MG / rosiglitazone 2 MG Oral Tablet [Avandamet]    |
| RxNorm     | 861816      | metformin hydrochloride 500 MG / rosiglitazone 4 MG Oral Tablet                |
| RxNorm     | 861817      | metformin hydrochloride 500 MG / rosiglitazone 4 MG [Avandamet]                |
| RxNorm     | 861818      | metformin hydrochloride 500 MG / rosiglitazone 4 MG Oral Tablet [Avandamet]    |
| RxNorm     | 861819      | metformin hydrochloride 500 MG / sitagliptin 50 MG Oral Tablet                 |
| RxNorm     | 861820      | metformin hydrochloride 500 MG / sitagliptin 50 MG [Janumet]                   |
| RxNorm     | 861821      | metformin hydrochloride 500 MG / sitagliptin 50 MG Oral Tablet [Janumet]       |
| RxNorm     | 861822      | metformin hydrochloride 850 MG / pioglitazone 15 MG Oral Tablet                |
| RxNorm     | 861823      | metformin hydrochloride 850 MG / pioglitazone 15 MG [Actoplus Met]             |
| RxNorm     | 861824      | metformin hydrochloride 850 MG / pioglitazone 15 MG Oral Tablet [Actoplus Met] |
| RxNorm     | 876009      | metformin hydrochloride 500 MG [Orabet Metformin]                              |
| RxNorm     | 876010      | metformin hydrochloride 850 MG [Orabet Metformin]                              |
| RxNorm     | 876033      | metformin hydrochloride 850 MG [Metforming]                                    |
| RxNorm     | 860974      | metformin hydrochloride 500 MG                                                 |
| RxNorm     | 860975      | 24 HR metformin hydrochloride 500 MG Extended Release Oral Tablet              |
| RxNorm     | 860976      | metformin hydrochloride 500 MG [Glucophage]                                    |
| RxNorm     | 860977      | 24 HR metformin hydrochloride 500 MG Extended Release Oral Tablet [Glucophage] |
| RxNorm     | 860978      | metformin hydrochloride 500 MG Extended Release Oral Tablet                    |
| RxNorm     | 860979      | metformin hydrochloride 500 MG Extended Release Oral Tablet [Glucophage]       |
| RxNorm     | 860980      | metformin hydrochloride 750 MG                                                 |

Continued on next page

**Table16 – continued from previous page**

| CodeSystem | ConceptCode | ConceptName                                                                            |
|------------|-------------|----------------------------------------------------------------------------------------|
| RxNorm     | 860981      | 24 HR metformin hydrochloride 750 MG Extended Release Oral Tablet                      |
| RxNorm     | 860982      | metformin hydrochloride 750 MG [Glucophage]                                            |
| RxNorm     | 860983      | 24 HR metformin hydrochloride 750 MG Extended Release Oral Tablet [Glucophage]         |
| RxNorm     | 860984      | metformin hydrochloride 750 MG Extended Release Oral Tablet                            |
| RxNorm     | 860985      | metformin hydrochloride 750 MG Extended Release Oral Tablet [Glucophage]               |
| RxNorm     | 860995      | metformin hydrochloride 1000 MG                                                        |
| RxNorm     | 860997      | metformin hydrochloride 1000 MG [Fortamet]                                             |
| RxNorm     | 860998      | Osmotic 24 HR metformin hydrochloride 1000 MG Extended Release Oral Tablet [Fortamet]  |
| RxNorm     | 860999      | metformin hydrochloride 1000 MG Extended Release Oral Tablet                           |
| RxNorm     | 861000      | metformin hydrochloride 1000 MG Extended Release Oral Tablet [Fortamet]                |
| RxNorm     | 861001      | metformin hydrochloride 500 MG [Fortamet]                                              |
| RxNorm     | 861002      | Osmotic 24 HR metformin hydrochloride 500 MG Extended Release Oral Tablet [Fortamet]   |
| RxNorm     | 861003      | metformin hydrochloride 500 MG Extended Release Oral Tablet [Fortamet]                 |
| RxNorm     | 861004      | metformin hydrochloride 1000 MG Oral Tablet                                            |
| RxNorm     | 861005      | metformin hydrochloride 1000 MG [Glucophage]                                           |
| RxNorm     | 861006      | metformin hydrochloride 1000 MG Oral Tablet [Glucophage]                               |
| RxNorm     | 861007      | metformin hydrochloride 500 MG Oral Tablet                                             |
| RxNorm     | 861008      | metformin hydrochloride 500 MG Oral Tablet [Glucophage]                                |
| RxNorm     | 861009      | metformin hydrochloride 850 MG                                                         |
| RxNorm     | 861010      | metformin hydrochloride 850 MG Oral Tablet                                             |
| RxNorm     | 861011      | metformin hydrochloride 850 MG [Glucophage]                                            |
| RxNorm     | 861012      | metformin hydrochloride 850 MG Oral Tablet [Glucophage]                                |
| RxNorm     | 861014      | metformin hydrochloride 1000 MG [Glumetza]                                             |
| RxNorm     | 861015      | Modified 24 HR metformin hydrochloride 1000 MG Extended Release Oral Tablet [Glumetza] |
| RxNorm     | 861016      | metformin hydrochloride 1000 MG Extended Release Oral Tablet [Glumetza]                |
| RxNorm     | 861017      | metformin hydrochloride 500 MG [Glumetza]                                              |
| RxNorm     | 861018      | Modified 24 HR metformin hydrochloride 500 MG Extended Release Oral Tablet [Glumetza]  |
| RxNorm     | 861019      | metformin hydrochloride 500 MG Extended Release Oral Tablet [Glumetza]                 |
| RxNorm     | 861020      | metformin hydrochloride 625 MG                                                         |

Continued on next page

**Table16 – continued from previous page**

| CodeSystem | ConceptCode | ConceptName                                                                                            |
|------------|-------------|--------------------------------------------------------------------------------------------------------|
| RxNorm     | 861021      | metformin hydrochloride 625 MG Oral Tablet                                                             |
| RxNorm     | 861022      | metformin hydrochloride 625 MG [Glucophage]                                                            |
| RxNorm     | 861023      | metformin hydrochloride 625 MG Oral Tablet [Glucophage]                                                |
| RxNorm     | 861024      | metformin hydrochloride 100 MG/ML                                                                      |
| RxNorm     | 861025      | metformin hydrochloride 100 MG/ML Oral Solution                                                        |
| RxNorm     | 861026      | metformin hydrochloride 100 MG/ML [Riomet]                                                             |
| RxNorm     | 861027      | metformin hydrochloride 100 MG/ML Oral Solution [Riomet]                                               |
| RxNorm     | 899988      | metformin / pioglitazone Extended Release Oral Tablet                                                  |
| RxNorm     | 899989      | 24 HR metformin hydrochloride 1000 MG / pioglitazone 15 MG Extended Release Oral Tablet                |
| RxNorm     | 899991      | metformin hydrochloride 1000 MG / pioglitazone 15 MG [Actoplus Met]                                    |
| RxNorm     | 899992      | metformin / pioglitazone Extended Release Oral Tablet [Actoplus Met]                                   |
| RxNorm     | 899993      | 24 HR metformin hydrochloride 1000 MG / pioglitazone 15 MG Extended Release Oral Tablet [Actoplus Met] |
| RxNorm     | 899994      | metformin hydrochloride 1000 MG / pioglitazone 15 MG Extended Release Oral Tablet                      |
| RxNorm     | 899995      | metformin hydrochloride 1000 MG / pioglitazone 15 MG Extended Release Oral Tablet [Actoplus Met]       |
| RxNorm     | 899996      | 24 HR metformin hydrochloride 1000 MG / pioglitazone 30 MG Extended Release Oral Tablet                |
| RxNorm     | 899998      | metformin hydrochloride 1000 MG / pioglitazone 30 MG [Actoplus Met]                                    |
| RxNorm     | 900000      | 24 HR metformin hydrochloride 1000 MG / pioglitazone 30 MG Extended Release Oral Tablet [Actoplus Met] |
| RxNorm     | 900001      | metformin hydrochloride 1000 MG / pioglitazone 30 MG Extended Release Oral Tablet                      |
| RxNorm     | 900002      | metformin hydrochloride 1000 MG / pioglitazone 30 MG Extended Release Oral Tablet [Actoplus Met]       |
| RxNorm     | 977566      | metformin hydrochloride 850 MG Extended Release Oral Tablet                                            |
| RxNorm     | 1007411     | chlorpropamide / metformin                                                                             |
| RxNorm     | 351269      | Metformin 500 MG / rosiglitazone 2 MG Oral Tablet                                                      |
| RxNorm     | 349554      | Metformin 500 MG / rosiglitazone 4 MG Oral Tablet                                                      |
| RxNorm     | 351268      | Metformin 500 MG / rosiglitazone 1 MG Oral Tablet                                                      |
| RxNorm     | 541765      | Metformin 1000 MG Extended Release Tablet                                                              |
| RxNorm     | 284433      | Glyburide 5 MG / Metformin 500 MG Oral Tablet [Glucovance]                                             |
| RxNorm     | 311572      | Metformin 850 MG Oral Tablet                                                                           |
| RxNorm     | 311571      | Metformin 500 MG Extended Release Tablet                                                               |
| RxNorm     | 213454      | Metformin 1000 MG Oral Tablet [Glucophage]                                                             |

Continued on next page

**Table16 – continued from previous page**

| CodeSystem | ConceptCode | ConceptName                                                             |
|------------|-------------|-------------------------------------------------------------------------|
| RxNorm     | 284432      | Glyburide 2.5 MG / Metformin 500 MG Oral Tablet [Glucovance]            |
| RxNorm     | 647242      | Metformin 500 MG Extended Release Tablet [Glumetza]                     |
| RxNorm     | 541811      | Metformin 500 MG Extended Release Tablet [Fortamet]                     |
| RxNorm     | 828382      | Metformin 750 MG Extended Release Tablet [Glucophage]                   |
| RxNorm     | 316257      | Metformin 850 MG                                                        |
| RxNorm     | 541769      | Metformin 1000 MG Extended Release Tablet [Fortamet]                    |
| RxNorm     | 351273      | Glipizide 2.5 MG / Metformin 500 MG Oral Tablet                         |
| RxNorm     | 311569      | Metformin 1000 MG Oral Tablet                                           |
| RxNorm     | 358336      | Metformin 500 MG 24 Hour Extended Release Tablet                        |
| RxNorm     | 351275      | Glipizide 2.5 MG / Metformin 250 MG Oral Tablet                         |
| RxNorm     | 284431      | Glyburide 1.25 MG / Metformin 250 MG Oral Tablet [Glucovance]           |
| RxNorm     | 731426      | Metformin 850 MG / pioglitazone 15 MG Oral Tablet [Actoplus Met 15/850] |
| RxNorm     | 351274      | Glipizide 5 MG / Metformin 500 MG Oral Tablet                           |
| RxNorm     | 731443      | Metformin 500 MG / pioglitazone 15 MG Oral Tablet [Actoplus Met 15/500] |
| RxNorm     | 574869      | Glyburide 1.25 MG / Metformin 250 MG [Glucovance]                       |
| RxNorm     | 566228      | Metformin 500 MG [Orabet]                                               |
| RxNorm     | 566230      | Metformin 850 MG [Orabet]                                               |
| RxNorm     | 574871      | Glyburide 5 MG / Metformin 500 MG [Glucovance]                          |
| RxNorm     | 403819      | Metformin 750 MG Extended Release Tablet                                |
| RxNorm     | 403968      | Metformin 100 MG/ML Oral Solution                                       |
| RxNorm     | 403915      | Metformin 1000 MG / rosiglitazone 2 MG Oral Tablet                      |
| RxNorm     | 541767      | Metformin 1000 MG [Fortamet]                                            |
| RxNorm     | 828303      | Metformin 500 MG Extended Release Tablet [Glucophage]                   |
| RxNorm     | 404727      | Metformin 100 MG/ML Oral Solution [Riomet]                              |
| RxNorm     | 574870      | Glyburide 2.5 MG / Metformin 500 MG [Glucovance]                        |
| RxNorm     | 406061      | Metformin 750 MG                                                        |
| RxNorm     | 403916      | Metformin 1000 MG / rosiglitazone 4 MG Oral Tablet                      |
| RxNorm     | 406081      | Metformin 100 MG/ML                                                     |
| RxNorm     | 577095      | Metformin 850 MG / pioglitazone 15 MG Oral Tablet                       |
| RxNorm     | 577094      | Metformin 500 MG / pioglitazone 15 MG Oral Tablet                       |
| RxNorm     | 583193      | Metformin 850 MG [Metforming]                                           |
| RxNorm     | 576612      | Metformin 100 MG/ML [Riomet]                                            |
| RxNorm     | 654546      | Metformin 625 MG Oral Tablet                                            |
| RxNorm     | 731441      | Metformin 500 MG / pioglitazone 15 MG [Actoplus Met 15/500]             |
| RxNorm     | 654545      | Metformin 625 MG                                                        |
| RxNorm     | 310538      | Glyburide 5 MG / Metformin 500 MG Oral Tablet                           |
| RxNorm     | 700518      | Metformin 1000 MG / sitagliptin 50 MG Oral Tablet                       |
| RxNorm     | 645110      | Metformin 500 MG [Glumetza]                                             |

Continued on next page

**Table16 – continued from previous page**

| CodeSystem | ConceptCode | ConceptName                                                               |
|------------|-------------|---------------------------------------------------------------------------|
| RxNorm     | 731424      | Metformin 850 MG / pioglitazone 15 MG [Actoplus Met 15/850]               |
| RxNorm     | 700517      | Metformin 500 MG / sitagliptin 50 MG Oral Tablet                          |
| RxNorm     | 310535      | Glyburide 2.5 MG / Metformin 500 MG Oral Tablet                           |
| RxNorm     | 310533      | Glyburide 1.25 MG / Metformin 250 MG Oral Tablet                          |
| RxNorm     | 566229      | Metformin 500 MG [Glucophage]                                             |
| RxNorm     | 311570      | Metformin 500 MG Oral Tablet                                              |
| RxNorm     | 573342      | Metformin 1000 MG [Glucophage]                                            |
| RxNorm     | 566231      | Metformin 850 MG [Glucophage]                                             |
| RxNorm     | 757606      | Metformin 500 MG / sitagliptin 50 MG [Janumet 50 mg/500 mg]               |
| RxNorm     | 204046      | Metformin 500 MG Oral Tablet [Glucophage]                                 |
| RxNorm     | 204048      | Metformin 850 MG Oral Tablet [Glucophage]                                 |
| RxNorm     | 476506      | Metformin 1000 MG 24 Hour Extended Release Tablet                         |
| RxNorm     | 757602      | Metformin 1000 MG / sitagliptin 50 MG [Janumet 50 mg/1000 mg]             |
| RxNorm     | 757608      | Metformin 500 MG / sitagliptin 50 MG Oral Tablet [Janumet 50 mg/500 mg]   |
| RxNorm     | 757604      | Metformin 1000 MG / sitagliptin 50 MG Oral Tablet [Janumet 50 mg/1000 mg] |
| RxNorm     | 541810      | Metformin 500 MG [Fortamet]                                               |
| RxNorm     | 802743      | Metformin 500 MG / repaglinide 1 MG Oral Tablet                           |
| RxNorm     | 802050      | Metformin 750 MG [Glucophage]                                             |
| RxNorm     | 801708      | Metformin 1000 MG Extended Release Tablet [Glumetza]                      |
| RxNorm     | 564040      | Metformin 850 MG [Glucamet]                                               |
| RxNorm     | 805669      | Metformin 500 MG / repaglinide 1 MG [PrandiMet 1/500]                     |
| RxNorm     | 564039      | Metformin 500 MG [Glucamet]                                               |
| RxNorm     | 801707      | Metformin 1000 MG [Glumetza]                                              |
| RxNorm     | 805673      | Metformin 500 MG / repaglinide 2 MG [PrandiMet 2/500]                     |
| RxNorm     | 806290      | Metformin 500 MG / rosiglitazone 4 MG [Avandamet 4/500]                   |
| RxNorm     | 805671      | Metformin 500 MG / repaglinide 1 MG Oral Tablet [PrandiMet 1/500]         |
| RxNorm     | 806288      | Metformin 1000 MG / rosiglitazone 2 MG Oral Tablet [Avandamet 2/1000]     |
| RxNorm     | 806296      | Metformin 500 MG / rosiglitazone 2 MG Oral Tablet [Avandamet 2/500]       |
| RxNorm     | 806276      | Metformin 500 MG / rosiglitazone 1 MG Oral Tablet [Avandamet 1/500]       |
| RxNorm     | 806284      | Metformin 1000 MG / rosiglitazone 4 MG Oral Tablet [Avandamet 4/1000]     |
| RxNorm     | 806294      | Metformin 500 MG / rosiglitazone 2 MG [Avandamet 2/500]                   |
| RxNorm     | 805675      | Metformin 500 MG / repaglinide 2 MG Oral Tablet [PrandiMet 2/500]         |

Continued on next page

**Table16 – continued from previous page**

| CodeSystem | ConceptCode | ConceptName                                                         |
|------------|-------------|---------------------------------------------------------------------|
| RxNorm     | 806292      | Metformin 500 MG / rosiglitazone 4 MG Oral Tablet [Avandamet 4/500] |
| RxNorm     | 806282      | Metformin 1000 MG / rosiglitazone 4 MG [Avandamet 4/1000]           |
| RxNorm     | 806286      | Metformin 1000 MG / rosiglitazone 2 MG [Avandamet 2/1000]           |
| RxNorm     | 802744      | Metformin 500 MG / repaglinide 2 MG Oral Tablet                     |
| RxNorm     | 806274      | Metformin 500 MG / rosiglitazone 1 MG [Avandamet 1/500]             |
| RxNorm     | 1184630     | PrandiMet 2/500 Pill                                                |
| RxNorm     | 1185628     | Metaglip 5 MG/500 MG Pill                                           |
| RxNorm     | 1169921     | Actoplus Met 15/1000 Pill                                           |
| RxNorm     | 1175023     | Avandamet 4/1000 Pill                                               |
| RxNorm     | 1175018     | Avandamet 2/1000 Oral Product                                       |
| RxNorm     | 1169927     | Actoplus Met 30/1000 Pill                                           |
| RxNorm     | 1175019     | Avandamet 2/1000 Pill                                               |
| RxNorm     | 1175024     | Avandamet 4/500 Oral Product                                        |
| RxNorm     | 1169922     | Actoplus Met 15/500 Oral Product                                    |
| RxNorm     | 1173547     | Kombiglyze 5/500 Oral Product                                       |
| RxNorm     | 1185625     | Metaglip 2.5 MG/500 MG Oral Product                                 |
| RxNorm     | 1171251     | Glucovance 2.5 MG/500 MG Pill                                       |
| RxNorm     | 1172859     | Kombiglyze 2.5/1000 Oral Product                                    |
| RxNorm     | 1169926     | Actoplus Met 30/1000 Oral Product                                   |
| RxNorm     | 1173546     | Kombiglyze 5/1000 Pill                                              |
| RxNorm     | 1175025     | Avandamet 4/500 Pill                                                |
| RxNorm     | 1243832     | Janumet 100/1000 Pill                                               |
| RxNorm     | 1175022     | Avandamet 4/1000 Oral Product                                       |
| RxNorm     | 1184629     | PrandiMet 2/500 Oral Product                                        |
| RxNorm     | 1175020     | Avandamet 2/500 Oral Product                                        |
| RxNorm     | 1185626     | Metaglip 2.5 MG/500 MG Pill                                         |
| RxNorm     | 1175017     | Avandamet 1/500 Pill                                                |
| RxNorm     | 1171253     | Glucovance 5 MG/500 MG Pill                                         |
| RxNorm     | 1171250     | Glucovance 2.5 MG/500 MG Oral Product                               |
| RxNorm     | 1167812     | Janumet 50/500 Oral Product                                         |
| RxNorm     | 1243032     | Jentadueto 2.5/500 Pill                                             |
| RxNorm     | 1169925     | Actoplus Met 15/850 Pill                                            |
| RxNorm     | 1173548     | Kombiglyze 5/500 Pill                                               |
| RxNorm     | 1167813     | Janumet 50/500 Pill                                                 |
| RxNorm     | 1171252     | Glucovance 5 MG/500 MG Oral Product                                 |
| RxNorm     | 1243024     | Jentadueto 2.5/1000 Oral Product                                    |
| RxNorm     | 1243831     | Janumet 100/1000 Oral Product                                       |
| RxNorm     | 2200517     | metformin Extended Release Suspension                               |
| RxNorm     | 2200518     | metformin hydrochloride 100 MG/ML Extended Release Suspension       |

Continued on next page

**Table16 – continued from previous page**

| CodeSystem | ConceptCode | ConceptName                                                                                                               |
|------------|-------------|---------------------------------------------------------------------------------------------------------------------------|
| RxNorm     | 2200519     | metformin Extended Release Suspension [Riomet]                                                                            |
| RxNorm     | 2200520     | metformin hydrochloride 100 MG/ML Extended Release Suspension [Riomet]                                                    |
| RxNorm     | 2281864     | empagliflozin / linagliptin / metformin                                                                                   |
| RxNorm     | 2371722     | dapagliflozin / metformin / saxagliptin Oral Product                                                                      |
| RxNorm     | 2371723     | dapagliflozin / metformin / saxagliptin Pill                                                                              |
| RxNorm     | 2371724     | dapagliflozin / metformin / saxagliptin Extended Release Oral Tablet                                                      |
| RxNorm     | 2371725     | 24 HR dapagliflozin 10 MG / metformin hydrochloride 1000 MG / saxagliptin 5 MG Extended Release Oral Tablet               |
| RxNorm     | 2371726     | Qternmet                                                                                                                  |
| RxNorm     | 2371727     | dapagliflozin 10 MG / metformin hydrochloride 1000 MG / saxagliptin 5 MG [Qternmet]                                       |
| RxNorm     | 2371728     | dapagliflozin / metformin / saxagliptin Extended Release Oral Tablet [Qternmet]                                           |
| RxNorm     | 2371729     | Qternmet Oral Product                                                                                                     |
| RxNorm     | 2371730     | Qternmet Pill                                                                                                             |
| RxNorm     | 2371731     | 24 HR dapagliflozin 10 MG / metformin hydrochloride 1000 MG / saxagliptin 5 MG Extended Release Oral Tablet [Qternmet]    |
| RxNorm     | 2371732     | dapagliflozin 10 MG / metformin hydrochloride 1000 MG / saxagliptin 5 MG Extended Release Oral Tablet                     |
| RxNorm     | 2371733     | dapagliflozin 10 MG / metformin hydrochloride 1000 MG / saxagliptin 5 MG Extended Release Oral Tablet [Qternmet]          |
| RxNorm     | 2371734     | 24 HR dapagliflozin 2.5 MG / metformin hydrochloride 1000 MG / saxagliptin 2.5 MG Extended Release Oral Tablet            |
| RxNorm     | 2371735     | dapagliflozin 2.5 MG / metformin hydrochloride 1000 MG / saxagliptin 2.5 MG [Qternmet]                                    |
| RxNorm     | 2371736     | 24 HR dapagliflozin 2.5 MG / metformin hydrochloride 1000 MG / saxagliptin 2.5 MG Extended Release Oral Tablet [Qternmet] |
| RxNorm     | 2371737     | dapagliflozin 2.5 MG / metformin hydrochloride 1000 MG / saxagliptin 2.5 MG Extended Release Oral Tablet                  |
| RxNorm     | 2371738     | dapagliflozin 2.5 MG / metformin hydrochloride 1000 MG / saxagliptin 2.5 MG Extended Release Oral Tablet [Qternmet]       |
| RxNorm     | 2371740     | 24 HR dapagliflozin 5 MG / metformin hydrochloride 1000 MG / saxagliptin 2.5 MG Extended Release Oral Tablet              |
| RxNorm     | 2371741     | dapagliflozin 5 MG / metformin hydrochloride 1000 MG / saxagliptin 2.5 MG [Qternmet]                                      |
| RxNorm     | 2371742     | 24 HR dapagliflozin 5 MG / metformin hydrochloride 1000 MG / saxagliptin 2.5 MG Extended Release Oral Tablet [Qternmet]   |

Continued on next page



**Table16 – continued from previous page**

| CodeSystem | ConceptCode | ConceptName                                                                                                            |
|------------|-------------|------------------------------------------------------------------------------------------------------------------------|
| RxNorm     | 2371743     | dapagliflozin 5 MG / metformin hydrochloride 1000 MG / saxagliptin 2.5 MG Extended Release Oral Tablet                 |
| RxNorm     | 2371744     | dapagliflozin 5 MG / metformin hydrochloride 1000 MG / saxagliptin 2.5 MG Extended Release Oral Tablet [Qternmet]      |
| RxNorm     | 2371745     | 24 HR dapagliflozin 5 MG / metformin hydrochloride 1000 MG / saxagliptin 5 MG Extended Release Oral Tablet             |
| RxNorm     | 2371746     | dapagliflozin 5 MG / metformin hydrochloride 1000 MG / saxagliptin 5 MG [Qternmet]                                     |
| RxNorm     | 2371747     | 24 HR dapagliflozin 5 MG / metformin hydrochloride 1000 MG / saxagliptin 5 MG Extended Release Oral Tablet [Qternmet]  |
| RxNorm     | 2371748     | dapagliflozin 5 MG / metformin hydrochloride 1000 MG / saxagliptin 5 MG Extended Release Oral Tablet                   |
| RxNorm     | 2371749     | dapagliflozin 5 MG / metformin hydrochloride 1000 MG / saxagliptin 5 MG Extended Release Oral Tablet [Qternmet]        |
| RxNorm     | 2359276     | empagliflozin / linagliptin / metformin Oral Product                                                                   |
| RxNorm     | 2359277     | empagliflozin / linagliptin / metformin Pill                                                                           |
| RxNorm     | 2359278     | empagliflozin / linagliptin / metformin Extended Release Oral Tablet                                                   |
| RxNorm     | 2359279     | 24 HR empagliflozin 10 MG / linagliptin 5 MG / metformin hydrochloride 1000 MG Extended Release Oral Tablet            |
| RxNorm     | 2359280     | Trijardy                                                                                                               |
| RxNorm     | 2359281     | empagliflozin 10 MG / linagliptin 5 MG / metformin hydrochloride 1000 MG [Trijardy]                                    |
| RxNorm     | 2359282     | empagliflozin / linagliptin / metformin Extended Release Oral Tablet [Trijardy]                                        |
| RxNorm     | 2359283     | Trijardy Oral Product                                                                                                  |
| RxNorm     | 2359284     | Trijardy Pill                                                                                                          |
| RxNorm     | 2359285     | 24 HR empagliflozin 10 MG / linagliptin 5 MG / metformin hydrochloride 1000 MG Extended Release Oral Tablet [Trijardy] |
| RxNorm     | 2359286     | empagliflozin 10 MG / linagliptin 5 MG / metformin hydrochloride 1000 MG Extended Release Oral Tablet                  |
| RxNorm     | 2359287     | empagliflozin 10 MG / linagliptin 5 MG / metformin hydrochloride 1000 MG Extended Release Oral Tablet [Trijardy]       |
| RxNorm     | 2359288     | 24 HR empagliflozin 12.5 MG / linagliptin 2.5 MG / metformin hydrochloride 1000 MG Extended Release Oral Tablet        |
| RxNorm     | 2359289     | empagliflozin 12.5 MG / linagliptin 2.5 MG / metformin hydrochloride 1000 MG [Trijardy]                                |

Continued on next page

**Table16 – continued from previous page**

| CodeSystem | ConceptCode | ConceptName                                                                                                                |
|------------|-------------|----------------------------------------------------------------------------------------------------------------------------|
| RxNorm     | 2359290     | 24 HR empagliflozin 12.5 MG / linagliptin 2.5 MG / metformin hydrochloride 1000 MG Extended Release Oral Tablet [Trijardy] |
| RxNorm     | 2359291     | empagliflozin 12.5 MG / linagliptin 2.5 MG / metformin hydrochloride 1000 MG Extended Release Oral Tablet                  |
| RxNorm     | 2359292     | empagliflozin 12.5 MG / linagliptin 2.5 MG / metformin hydrochloride 1000 MG Extended Release Oral Tablet [Trijardy]       |
| RxNorm     | 2359351     | 24 HR empagliflozin 25 MG / linagliptin 5 MG / metformin hydrochloride 1000 MG Extended Release Oral Tablet                |
| RxNorm     | 2359352     | empagliflozin 25 MG / linagliptin 5 MG / metformin hydrochloride 1000 MG [Trijardy]                                        |
| RxNorm     | 2359353     | 24 HR empagliflozin 25 MG / linagliptin 5 MG / metformin hydrochloride 1000 MG Extended Release Oral Tablet [Trijardy]     |
| RxNorm     | 2359354     | empagliflozin 25 MG / linagliptin 5 MG / metformin hydrochloride 1000 MG Extended Release Oral Tablet                      |
| RxNorm     | 2359355     | empagliflozin 25 MG / linagliptin 5 MG / metformin hydrochloride 1000 MG Extended Release Oral Tablet [Trijardy]           |
| RxNorm     | 2359356     | 24 HR empagliflozin 5 MG / linagliptin 2.5 MG / metformin hydrochloride 1000 MG Extended Release Oral Tablet               |
| RxNorm     | 2359357     | empagliflozin 5 MG / linagliptin 2.5 MG / metformin hydrochloride 1000 MG [Trijardy]                                       |
| RxNorm     | 2359358     | 24 HR empagliflozin 5 MG / linagliptin 2.5 MG / metformin hydrochloride 1000 MG Extended Release Oral Tablet [Trijardy]    |
| RxNorm     | 2359359     | empagliflozin 5 MG / linagliptin 2.5 MG / metformin hydrochloride 1000 MG Extended Release Oral Tablet                     |
| RxNorm     | 2359360     | empagliflozin 5 MG / linagliptin 2.5 MG / metformin hydrochloride 1000 MG Extended Release Oral Tablet [Trijardy]          |
| RxNorm     | 246522      | chlorpropamide 125 MG / metformin 400 MG Oral Tablet                                                                       |
| RxNorm     | 250919      | glyburide 2.5 MG / metformin 400 MG Oral Tablet                                                                            |
| RxNorm     | 284743      | Glucovance                                                                                                                 |
| RxNorm     | 285129      | glyburide / metformin                                                                                                      |
| RxNorm     | 330861      | metformin 250 MG                                                                                                           |
| RxNorm     | 316255      | metformin 1000 MG                                                                                                          |
| RxNorm     | 316256      | metformin 500 MG                                                                                                           |
| RxNorm     | 332809      | metformin 400 MG                                                                                                           |
| RxNorm     | 352381      | glipizide / metformin                                                                                                      |
| RxNorm     | 352450      | Avandamet                                                                                                                  |
| RxNorm     | 352764      | Metaglip                                                                                                                   |

Continued on next page

**Table16 – continued from previous page**

| CodeSystem | ConceptCode | ConceptName                                                       |
|------------|-------------|-------------------------------------------------------------------|
| RxNorm     | 368254      | metformin Oral Tablet [Glucophage]                                |
| RxNorm     | 361841      | metformin Oral Tablet [Orabet Metformin]                          |
| RxNorm     | 368526      | metformin Oral Tablet [Glucamet]                                  |
| RxNorm     | 371466      | chlorpropamide / metformin Oral Tablet                            |
| RxNorm     | 374635      | glyburide / metformin Oral Tablet                                 |
| RxNorm     | 372803      | metformin Oral Tablet                                             |
| RxNorm     | 372804      | metformin Extended Release Oral Tablet                            |
| RxNorm     | 378729      | metformin / rosiglitazone Oral Tablet                             |
| RxNorm     | 378730      | glipizide / metformin Oral Tablet                                 |
| RxNorm     | 405304      | Riomet                                                            |
| RxNorm     | 406082      | metformin Oral Solution                                           |
| RxNorm     | 406257      | metformin Oral Solution [Riomet]                                  |
| RxNorm     | 431724      | 12 HR metformin hydrochloride 850 MG Extended Release Oral Tablet |
| RxNorm     | 432366      | chlorpropamide 125 MG / metformin 513 MG Oral Tablet              |
| RxNorm     | 428759      | metformin 250 MG Oral Tablet                                      |
| RxNorm     | 432780      | chlorpropamide 125 MG / metformin 500 MG Oral Tablet              |
| RxNorm     | 429841      | glyburide 5 MG / metformin 1000 MG Oral Tablet                    |
| RxNorm     | 438507      | metformin 513 MG                                                  |
| RxNorm     | 541766      | Fortamet                                                          |
| RxNorm     | 541768      | metformin Extended Release Oral Tablet [Fortamet]                 |
| RxNorm     | 541774      | metformin / ropinirole Oral Tablet                                |
| RxNorm     | 541775      | metformin 500 MG / ropinirole 2 MG Oral Tablet                    |
| RxNorm     | 583192      | Metforming                                                        |
| RxNorm     | 583194      | metformin Oral Tablet [Metforming]                                |
| RxNorm     | 583195      | metformin hydrochloride 850 MG Oral Tablet [Metforming]           |
| RxNorm     | 602411      | Actoplus Met                                                      |
| RxNorm     | 607999      | metformin / pioglitazone                                          |
| RxNorm     | 614348      | metformin / rosiglitazone                                         |
| RxNorm     | 577093      | metformin / pioglitazone Oral Tablet                              |
| RxNorm     | 645109      | Glumetza                                                          |
| RxNorm     | 647241      | metformin Extended Release Oral Tablet [Glumetza]                 |
| RxNorm     | 700516      | metformin / sitagliptin Oral Tablet                               |
| RxNorm     | 729717      | metformin / sitagliptin                                           |
| RxNorm     | 731442      | metformin / pioglitazone Oral Tablet [Actoplus Met]               |
| RxNorm     | 757603      | metformin / sitagliptin Oral Tablet [Janumet]                     |

### 1.5.2 Insulin

Table 17: Concept codes used to identify insulin medications.

| CodeSystem | ConceptCode | ConceptName                                                                                                                |
|------------|-------------|----------------------------------------------------------------------------------------------------------------------------|
| RxNorm     | 253182      | insulin, regular, human                                                                                                    |
| RxNorm     | 1544487     | Regular Insulin, Human 0.7 MG/ACTUAT                                                                                       |
| RxNorm     | 1544489     | Regular Insulin, Human 0.7 MG/ACTUAT [Afrezza]                                                                             |
| RxNorm     | 1543204     | Regular Insulin, Human 0.35 MG/ACTUAT [Afrezza]                                                                            |
| RxNorm     | 1543201     | Regular Insulin, Human Inhalant Powder                                                                                     |
| RxNorm     | 1543205     | Regular Insulin, Human Inhalant Powder [Afrezza]                                                                           |
| RxNorm     | 1543199     | Regular Insulin, Human 0.35 MG/ACTUAT                                                                                      |
| RxNorm     | 380934      | Insulin, Isophane, Human / Insulin, Regular, Human In-<br>jectable Suspension [Human Mixtard Penfill]                      |
| RxNorm     | 379754      | Insulin, Isophane, Human / Insulin, Regular, Human In-<br>jectable Suspension [Novolin 70/30 PenFill]                      |
| RxNorm     | 365578      | Insulin, Isophane, Human / Insulin, Regular, Human In-<br>jectable Suspension [Humulin M1]                                 |
| RxNorm     | 365580      | Insulin, Isophane, Human / Insulin, Regular, Human In-<br>jectable Suspension [Pur-In Mix 50/50]                           |
| RxNorm     | 365577      | Insulin, Isophane, Human / Insulin, Regular, Human In-<br>jectable Suspension [Humulin M2]                                 |
| RxNorm     | 365575      | Insulin, Isophane, Human / Insulin, Regular, Human In-<br>jectable Suspension [Humulin M5]                                 |
| RxNorm     | 379741      | Insulin, Isophane, Human / Insulin, Regular, Human In-<br>jectable Suspension [Human Mixtard 50]                           |
| RxNorm     | 365673      | Insulin, Isophane, Human / Insulin, Regular, Human In-<br>jectable Suspension [Humulin 70/30]                              |
| RxNorm     | 311023      | Insulin, Isophane, Human 70 UNT/ML / Insulin, Regular,<br>Human 30 UNT/ML Injectable Suspension [Novolin 70/30<br>PenFill] |
| RxNorm     | 379742      | Insulin, Isophane, Human / Insulin, Regular, Human In-<br>jectable Suspension [Human Mixtard 30 ge]                        |
| RxNorm     | 365582      | Insulin, Isophane, Human / Insulin, Regular, Human In-<br>jectable Suspension [Humulin M3]                                 |
| RxNorm     | 365576      | Insulin, Isophane, Human / Insulin, Regular, Human In-<br>jectable Suspension [Humulin M4]                                 |
| RxNorm     | 365684      | Insulin, Isophane, Human / Insulin, Regular, Human In-<br>jectable Suspension [Pur-In Mix 25/75]                           |
| RxNorm     | 575139      | Insulin, Isophane, Human 70 UNT/ML / Insulin, Regular,<br>Human 30 UNT/ML [Novolin 70/30 PenFill]                          |
| RxNorm     | 724341      | Insulin, Isophane, Human / Insulin, Regular, Human In-<br>jectable Suspension [ReliOn/Novolin 70/30]                       |
| RxNorm     | 727909      | 1.5 ML Insulin, Isophane, Human 70 UNT/ML / Insulin,<br>Regular, Human 30 UNT/ML Prefilled Syringe                         |
| RxNorm     | 727917      | 3 ML Insulin, Regular, Human 100 UNT/ML Prefilled Sy-<br>ringe                                                             |

Continued on next page

**Table17 – continued from previous page**

| CodeSystem | ConceptCode | ConceptName                                                                                                         |
|------------|-------------|---------------------------------------------------------------------------------------------------------------------|
| RxNorm     | 727770      | 3 ML Insulin, Isophane, Human 50 UNT/ML / Insulin, Regular, Human 50 UNT/ML Prefilled Syringe                       |
| RxNorm     | 727766      | 3 ML Insulin, Isophane, Human 85 UNT/ML / Insulin, Regular, Human 15 UNT/ML Prefilled Syringe                       |
| RxNorm     | 727626      | Insulin, Isophane, Human / Insulin, Regular, Human Prefilled Syringe                                                |
| RxNorm     | 723552      | Insulin, Regular, Human Injectable Solution [ReliOn R/Novolin]                                                      |
| RxNorm     | 727895      | Insulin, Isophane, Human / Insulin, Regular, Human Prefilled Syringe [Humulin 70/30]                                |
| RxNorm     | 727916      | Insulin, Regular, Human Prefilled Syringe                                                                           |
| RxNorm     | 727769      | 3 ML Insulin, Isophane, Human 60 UNT/ML / Insulin, Regular, Human 40 UNT/ML Prefilled Syringe                       |
| RxNorm     | 727918      | 1.5 ML Insulin, Regular, Human 100 UNT/ML Prefilled Syringe                                                         |
| RxNorm     | 727627      | 3 ML Insulin, Isophane, Human 70 UNT/ML / Insulin, Regular, Human 30 UNT/ML Prefilled Syringe                       |
| RxNorm     | 727755      | 3 ML Insulin, Isophane, Human 90 UNT/ML / Insulin, Regular, Human 10 UNT/ML Prefilled Syringe                       |
| RxNorm     | 727628      | Insulin, Isophane, Human / Insulin, Regular, Human Prefilled Syringe [Novolin 70/30]                                |
| RxNorm     | 727896      | 3 ML Insulin, Isophane, Human 70 UNT/ML / Insulin, Regular, Human 30 UNT/ML Prefilled Syringe [Humulin 70/30]       |
| RxNorm     | 724342      | Insulin, Isophane, Human 70 UNT/ML / Insulin, Regular, Human 30 UNT/ML Injectable Suspension [ReliOn/Novolin 70/30] |
| RxNorm     | 727629      | 3 ML Insulin, Isophane, Human 70 UNT/ML / Insulin, Regular, Human 30 UNT/ML Prefilled Syringe [Novolin 70/30]       |
| RxNorm     | 727768      | 3 ML Insulin, Isophane, Human 75 UNT/ML / Insulin, Regular, Human 25 UNT/ML Prefilled Syringe                       |
| RxNorm     | 723553      | Insulin, Regular, Human 100 UNT/ML Injectable Solution [ReliOn R/Novolin]                                           |
| RxNorm     | 727910      | 1.5 ML Insulin, Isophane, Human 70 UNT/ML / Insulin, Regular, Human 30 UNT/ML Prefilled Syringe [Novolin 70/30]     |
| RxNorm     | 723551      | Insulin, Regular, Human 100 UNT/ML [ReliOn R/Novolin]                                                               |
| RxNorm     | 727767      | 3 ML Insulin, Isophane, Human 80 UNT/ML / Insulin, Regular, Human 20 UNT/ML Prefilled Syringe                       |
| RxNorm     | 724340      | Insulin, Isophane, Human 70 UNT/ML / Insulin, Regular, Human 30 UNT/ML [ReliOn/Novolin 70/30]                       |
| RxNorm     | 1172687     | Humulin M2 Injectable Product                                                                                       |
| RxNorm     | 1172688     | Humulin M3 Injectable Product                                                                                       |
| RxNorm     | 1008501     | insulin isophane / insulin, regular, human                                                                          |

Continued on next page

**Table17 – continued from previous page**

| CodeSystem | ConceptCode | ConceptName                                                                                                                                                                                                                  |
|------------|-------------|------------------------------------------------------------------------------------------------------------------------------------------------------------------------------------------------------------------------------|
| RxNorm     | 108813      | insulin isophane, human 90 UNT/ML / insulin, regular, human 10 UNT/ML Injectable Suspension [Human Mixtard]                                                                                                                  |
| RxNorm     | 108814      | insulin isophane, human 80 UNT/ML / insulin, regular, human 20 UNT/ML Injectable Suspension [Human Mixtard]                                                                                                                  |
| RxNorm     | 108815      | insulin isophane, human 70 UNT/ML / insulin, regular, human 30 UNT/ML Injectable Suspension [Human Mixtard]                                                                                                                  |
| RxNorm     | 108816      | insulin isophane, human 50 UNT/ML / insulin, regular, human 50 UNT/ML Injectable Suspension [Human Mixtard]                                                                                                                  |
| RxNorm     | 108822      | insulin isophane, human 60 UNT/ML / insulin, regular, human 40 UNT/ML Injectable Suspension [Human Mixtard]                                                                                                                  |
| RxNorm     | 2644769     | {9 (insulin, regular, human 12 UNT Inhalation Powder [Afrezza]) / 9 (insulin, regular, human 4 UNT Inhalation Powder [Afrezza]) / 9 (insulin, regular, human 8 UNT Inhalation Powder [Afrezza]) } Pack [Afrezza Sample Pack] |
| RxNorm     | 2644768     | {9 (insulin, regular, human 12 UNT Inhalation Powder) / 9 (insulin, regular, human 4 UNT Inhalation Powder) / 9 (insulin, regular, human 8 UNT Inhalation Powder) } Pack Velosulin                                           |
| RxNorm     | 11160       |                                                                                                                                                                                                                              |
| RxNorm     | 106892      | insulin isophane, human 70 UNT/ML / insulin, regular, human 30 UNT/ML Injectable Suspension [Humulin]                                                                                                                        |
| RxNorm     | 106894      | insulin isophane, human 85 UNT/ML / insulin, regular, human 15 UNT/ML Injectable Suspension [Pur-In Mix]                                                                                                                     |
| RxNorm     | 106895      | insulin isophane, human 75 UNT/ML / insulin, regular, human 25 UNT/ML Injectable Suspension [Pur-In Mix]                                                                                                                     |
| RxNorm     | 106896      | insulin isophane, human 50 UNT/ML / insulin, regular, human 50 UNT/ML Injectable Suspension [Pur-In Mix]                                                                                                                     |
| RxNorm     | 106899      | insulin isophane, human 90 UNT/ML / insulin, regular, human 10 UNT/ML Injectable Suspension [Humulin]                                                                                                                        |
| RxNorm     | 106900      | insulin isophane, human 80 UNT/ML / insulin, regular, human 20 UNT/ML Injectable Suspension [Humulin]                                                                                                                        |
| RxNorm     | 106901      | insulin isophane, human 60 UNT/ML / insulin, regular, human 40 UNT/ML Injectable Suspension [Humulin]                                                                                                                        |
| RxNorm     | 108407      | insulin isophane, human 50 UNT/ML / insulin, regular, human 50 UNT/ML Injectable Suspension [Humulin]                                                                                                                        |
| RxNorm     | 1164824     | insulin, regular, human Injectable Product                                                                                                                                                                                   |
| RxNorm     | 1171292     | Human Actrapid Injectable Product                                                                                                                                                                                            |
| RxNorm     | 1171293     | Human Actrapid Penfill Injectable Product                                                                                                                                                                                    |
| RxNorm     | 1171296     | Human Mixtard Injectable Product                                                                                                                                                                                             |
| RxNorm     | 1171997     | Humulin Injectable Product                                                                                                                                                                                                   |
| RxNorm     | 1172692     | Humulin R Injectable Product                                                                                                                                                                                                 |
| RxNorm     | 1172693     | Humulin S Injectable Product                                                                                                                                                                                                 |
| RxNorm     | 1183566     | Pur-In Mix Injectable Product                                                                                                                                                                                                |
| RxNorm     | 1183568     | Pur-In Neutral Injectable Product                                                                                                                                                                                            |

Continued on next page

**Table17 – continued from previous page**

| CodeSystem | ConceptCode | ConceptName                                                                                                                                                                   |
|------------|-------------|-------------------------------------------------------------------------------------------------------------------------------------------------------------------------------|
| RxNorm     | 1178125     | Novolin Injectable Product                                                                                                                                                    |
| RxNorm     | 1178128     | Novolin R Injectable Product                                                                                                                                                  |
| RxNorm     | 1187762     | Velosulin Injectable Product                                                                                                                                                  |
| RxNorm     | 1359720     | insulin isophane, human 70 UNT/ML / insulin, regular, human 30 UNT/ML Prefilled Syringe [Humulin]                                                                             |
| RxNorm     | 1360172     | insulin isophane, human 70 UNT/ML / insulin, regular, human 30 UNT/ML Prefilled Syringe                                                                                       |
| RxNorm     | 1360226     | insulin isophane, human 70 UNT/ML / insulin, regular, human 30 UNT/ML Prefilled Syringe [Novolin]                                                                             |
| RxNorm     | 1360482     | insulin, regular, human 100 UNT/ML Prefilled Syringe                                                                                                                          |
| RxNorm     | 1360435     | insulin, regular, human 100 UNT/ML Prefilled Syringe [Novolin R]                                                                                                              |
| RxNorm     | 1372685     | Human Mixtard                                                                                                                                                                 |
| RxNorm     | 1372723     | Novolin                                                                                                                                                                       |
| RxNorm     | 1372744     | Humulin                                                                                                                                                                       |
| RxNorm     | 1372761     | Pur-In Mix                                                                                                                                                                    |
| RxNorm     | 150659      | insulin, regular, human 100 UNT/ML Injectable Solution [Pur-In Neutral]                                                                                                       |
| RxNorm     | 150831      | insulin, regular, human 100 UNT/ML Injectable Solution [Human Actrapid Penfill]                                                                                               |
| RxNorm     | 150973      | insulin, regular, human 100 UNT/ML Injectable Solution [Human Actrapid]                                                                                                       |
| RxNorm     | 150974      | insulin, regular, human 100 UNT/ML Injectable Solution [Humulin S]                                                                                                            |
| RxNorm     | 1544488     | insulin, regular, human 8 UNT Inhalation Powder                                                                                                                               |
| RxNorm     | 1544490     | insulin, regular, human 8 UNT Inhalation Powder [Afrezza]                                                                                                                     |
| RxNorm     | 1544568     | {60 (insulin, regular, human 4 UNT Inhalation Powder) / 30 (insulin, regular, human 8 UNT Inhalation Powder) } Pack                                                           |
| RxNorm     | 1544569     | {60 (insulin, regular, human 4 UNT Inhalation Powder [Afrezza]) / 30 (insulin, regular, human 8 UNT Inhalation Powder [Afrezza]) } Pack [Afrezza 90 - 60 (4 UNT), 30 (8 UNT)] |
| RxNorm     | 1544570     | {30 (insulin, regular, human 4 UNT Inhalation Powder) / 60 (insulin, regular, human 8 UNT Inhalation Powder) } Pack                                                           |
| RxNorm     | 1544571     | {30 (insulin, regular, human 4 UNT Inhalation Powder [Afrezza]) / 60 (insulin, regular, human 8 UNT Inhalation Powder [Afrezza]) } Pack [Afrezza 90 - 30 (4 UNT), 60 (8 UNT)] |
| RxNorm     | 1543200     | insulin, regular, human Inhalant Product                                                                                                                                      |
| RxNorm     | 1543202     | insulin, regular, human 4 UNT Inhalation Powder                                                                                                                               |
| RxNorm     | 1543203     | Afrezza                                                                                                                                                                       |

Continued on next page

**Table17 – continued from previous page**

| CodeSystem | ConceptCode | ConceptName                                                                                                                                                                     |
|------------|-------------|---------------------------------------------------------------------------------------------------------------------------------------------------------------------------------|
| RxNorm     | 1543206     | Afrezza Inhalant Product                                                                                                                                                        |
| RxNorm     | 1543207     | insulin, regular, human 4 UNT Inhalation Powder [Afrezza]                                                                                                                       |
| RxNorm     | 152644      | Human Actrapid                                                                                                                                                                  |
| RxNorm     | 1650256     | insulin, regular, human 4 UNT                                                                                                                                                   |
| RxNorm     | 1650260     | insulin, regular, human 4 UNT [Afrezza]                                                                                                                                         |
| RxNorm     | 1650262     | insulin, regular, human 8 UNT                                                                                                                                                   |
| RxNorm     | 1650264     | insulin, regular, human 8 UNT [Afrezza]                                                                                                                                         |
| RxNorm     | 1653899     | insulin isophane / insulin, regular, human Injectable Product                                                                                                                   |
| RxNorm     | 1654651     | insulin isophane / insulin, regular, human Pen Injector                                                                                                                         |
| RxNorm     | 1654855     | insulin isophane / insulin, regular, human Pen Injector [Humulin]                                                                                                               |
| RxNorm     | 1654857     | insulin isophane, human 70 UNT/ML / insulin, regular, human 30 UNT/ML Pen Injector                                                                                              |
| RxNorm     | 1654858     | insulin isophane, human 70 UNT/ML / insulin, regular, human 30 UNT/ML Pen Injector [Humulin]                                                                                    |
| RxNorm     | 1654909     | insulin, regular, human 12 UNT                                                                                                                                                  |
| RxNorm     | 1654910     | insulin, regular, human 12 UNT Inhalation Powder                                                                                                                                |
| RxNorm     | 1654911     | insulin, regular, human 12 UNT [Afrezza]                                                                                                                                        |
| RxNorm     | 1654912     | insulin, regular, human 12 UNT Inhalation Powder [Afrezza]                                                                                                                      |
| RxNorm     | 1656705     | {30 (insulin, regular, human 12 UNT Inhalation Powder) / 60 (insulin, regular, human 8 UNT Inhalation Powder) } Pack                                                            |
| RxNorm     | 1656706     | {30 (insulin, regular, human 12 UNT Inhalation Powder [Afrezza]) / 60 (insulin, regular, human 8 UNT Inhalation Powder [Afrezza]) } Pack [Afrezza 90 - 60 (8 UNT), 30 (12 UNT)] |
| RxNorm     | 1731314     | insulin, regular, human Pen Injector                                                                                                                                            |
| RxNorm     | 1731315     | 3 ML insulin, regular, human 500 UNT/ML Pen Injector                                                                                                                            |
| RxNorm     | 1731316     | insulin, regular, human Pen Injector [Humulin R]                                                                                                                                |
| RxNorm     | 1731317     | 3 ML insulin, regular, human 500 UNT/ML Pen Injector [Humulin R]                                                                                                                |
| RxNorm     | 1731318     | insulin, regular, human 500 UNT/ML Pen Injector                                                                                                                                 |
| RxNorm     | 1731319     | insulin, regular, human 500 UNT/ML Pen Injector [Humulin R]                                                                                                                     |
| RxNorm     | 1798387     | {90 (insulin, regular, human 4 UNT Inhalation Powder) / 90 (insulin, regular, human 8 UNT Inhalation Powder) } Pack                                                             |
| RxNorm     | 1798388     | {90 (insulin, regular, human 4 UNT Inhalation Powder [Afrezza]) / 90 (insulin, regular, human 8 UNT Inhalation Powder [Afrezza]) } Pack [Afrezza Titration Pack]                |

Continued on next page



**Table17 – continued from previous page**

| CodeSystem | ConceptCode | ConceptName                                                                                                                                                                                                                                                                 |
|------------|-------------|-----------------------------------------------------------------------------------------------------------------------------------------------------------------------------------------------------------------------------------------------------------------------------|
| RxNorm     | 1862101     | {60 (insulin, regular, human 12 UNT Inhalation Powder) / 60 (insulin, regular, human 4 UNT Inhalation Powder) / 60 (insulin, regular, human 8 UNT Inhalation Powder) } Pack                                                                                                 |
| RxNorm     | 1862102     | {60 (insulin, regular, human 12 UNT Inhalation Powder [Afrezza]) / 60 (insulin, regular, human 4 UNT Inhalation Powder [Afrezza]) / 60 (insulin, regular, human 8 UNT Inhalation Powder [Afrezza]) } Pack [Afrezza 180 Titration Pack- 60 (4 UNT), 60 (8 UNT), 60 (12 UNT)] |
| RxNorm     | 203209      | Human Actrapid Penfill                                                                                                                                                                                                                                                      |
| RxNorm     | 2049379     | insulin isophane / insulin, regular, human Pen Injector [Novolin]                                                                                                                                                                                                           |
| RxNorm     | 2049380     | 3 ML insulin isophane, human 70 UNT/ML / insulin, regular, human 30 UNT/ML Pen Injector [Novolin]                                                                                                                                                                           |
| RxNorm     | 2049381     | insulin isophane, human 70 UNT/ML / insulin, regular, human 30 UNT/ML Pen Injector [Novolin]                                                                                                                                                                                |
| RxNorm     | 2100028     | {90 (insulin, regular, human 12 UNT Inhalation Powder) / 90 (insulin, regular, human 8 UNT Inhalation Powder) } Pack                                                                                                                                                        |
| RxNorm     | 2100029     | {90 (insulin, regular, human 12 UNT Inhalation Powder [Afrezza]) / 90 (insulin, regular, human 8 UNT Inhalation Powder [Afrezza]) } Pack [Afrezza 180 - 90 (8 UNT), 90 (12 UNT)]                                                                                            |
| RxNorm     | 2108525     | insulin, regular, human Inhalation Powder                                                                                                                                                                                                                                   |
| RxNorm     | 2108527     | insulin, regular, human Inhalation Powder [Afrezza]                                                                                                                                                                                                                         |
| RxNorm     | 847186      | insulin isophane / insulin, regular, human Prefilled Syringe                                                                                                                                                                                                                |
| RxNorm     | 847187      | 3 ML insulin isophane, human 70 UNT/ML / insulin, regular, human 30 UNT/ML Pen Injector                                                                                                                                                                                     |
| RxNorm     | 847188      | insulin isophane / insulin, regular, human Prefilled Syringe [Humulin]                                                                                                                                                                                                      |
| RxNorm     | 847189      | 3 ML insulin isophane, human 70 UNT/ML / insulin, regular, human 30 UNT/ML Pen Injector [Humulin]                                                                                                                                                                           |
| RxNorm     | 847194      | insulin isophane / insulin, regular, human Prefilled Syringe [Novolin]                                                                                                                                                                                                      |
| RxNorm     | 847202      | insulin, regular, human Prefilled Syringe                                                                                                                                                                                                                                   |
| RxNorm     | 847203      | 3 ML insulin, regular, human 100 UNT/ML Prefilled Syringe                                                                                                                                                                                                                   |
| RxNorm     | 847204      | insulin, regular, human Prefilled Syringe [Novolin R]                                                                                                                                                                                                                       |
| RxNorm     | 847205      | 3 ML insulin, regular, human 100 UNT/ML Prefilled Syringe [Novolin R]                                                                                                                                                                                                       |
| RxNorm     | 847256      | 1.5 ML insulin isophane, human 70 UNT/ML / insulin, regular, human 30 UNT/ML Prefilled Syringe                                                                                                                                                                              |
| RxNorm     | 847257      | 1.5 ML insulin isophane, human 70 UNT/ML / insulin, regular, human 30 UNT/ML Prefilled Syringe [Novolin]                                                                                                                                                                    |

Continued on next page

**Table17 – continued from previous page**

| CodeSystem | ConceptCode | ConceptName                                                                                                        |
|------------|-------------|--------------------------------------------------------------------------------------------------------------------|
| RxNorm     | 847343      | 1.5 ML insulin isophane, human 70 UNT/ML / insulin, regular, human 30 UNT/ML Prefilled Syringe [Humulin]           |
| RxNorm     | 847417      | 1.5 ML insulin, regular, human 100 UNT/ML Prefilled Syringe                                                        |
| RxNorm     | 92881       | Humulin R                                                                                                          |
| RxNorm     | 93560       | Novolin R                                                                                                          |
| RxNorm     | 575133      | Insulin, Isophane, Human 50 UNT/ML / Insulin, Regular, Human 50 UNT/ML [Humulin 50/50]                             |
| RxNorm     | 106893      | Insulin, Isophane, Human 70 UNT/ML / Insulin, Regular, Human 30 UNT/ML Injectable Suspension [Human Mixtard 30]    |
| RxNorm     | 108812      | Insulin, Isophane, Human 70 UNT/ML / Insulin, Regular, Human 30 UNT/ML Injectable Suspension [Human Mixtard 30 ge] |
| RxNorm     | 847195      | 3 ML insulin human, isophane 70 UNT/ML / Regular Insulin, Human 30 UNT/ML Prefilled Syringe [Novolin]              |
| RxNorm     | 213441      | Insulin, Isophane, Human 70 UNT/ML / Insulin, Regular, Human 30 UNT/ML Injectable Suspension [Humulin 70/30]       |
| RxNorm     | 153122      | Insulin, Isophane, Human 50 UNT/ML / Insulin, Regular, Human 50 UNT/ML Injectable Suspension [Human Mixtard 50]    |
| RxNorm     | 311016      | Insulin, Isophane, Human 50 UNT/ML / Insulin, Regular, Human 50 UNT/ML Injectable Suspension [Humulin 50/50]       |
| RxNorm     | 564604      | Insulin, Isophane, Human 50 UNT/ML / Insulin, Regular, Human 50 UNT/ML [Human Mixtard Penfill]                     |
| RxNorm     | 564394      | Insulin, Isophane, Human 70 UNT/ML / Insulin, Regular, Human 30 UNT/ML [Human Mixtard 30]                          |
| RxNorm     | 564600      | Insulin, Isophane, Human 70 UNT/ML / Insulin, Regular, Human 30 UNT/ML [Human Mixtard 30 ge]                       |
| RxNorm     | 564393      | Insulin, Isophane, Human 70 UNT/ML / Insulin, Regular, Human 30 UNT/ML [Humulin M3]                                |
| RxNorm     | 1156396     | NPH Insulin, Human / Regular Insulin, Human Injectable Product                                                     |
| RxNorm     | 1172689     | Humulin M4 Injectable Product                                                                                      |
| RxNorm     | 1171298     | Human Mixtard 50 Injectable Product                                                                                |
| RxNorm     | 1172690     | Humulin M5 Injectable Product                                                                                      |
| RxNorm     | 1183567     | Pur-In Mix 50/50 Injectable Product                                                                                |
| RxNorm     | 1183565     | Pur-In Mix 15/85 Injectable Product                                                                                |
| RxNorm     | 1172683     | Humulin 70/30 Injectable Product                                                                                   |
| RxNorm     | 1172686     | Humulin M1 Injectable Product                                                                                      |
| RxNorm     | 1171299     | Human Mixtard Penfill Injectable Product                                                                           |
| RxNorm     | 1171297     | Human Mixtard 30 ge Injectable Product                                                                             |

Continued on next page

**Table17 – continued from previous page**

| CodeSystem | ConceptCode | ConceptName                                                                                           |
|------------|-------------|-------------------------------------------------------------------------------------------------------|
| RxNorm     | 213442      | insulin isophane, human 70 UNT/ML / insulin, regular, human 30 UNT/ML Injectable Suspension [Novolin] |
| RxNorm     | 2179742     | insulin, regular, human 1 UNT/ML                                                                      |
| RxNorm     | 2179743     | insulin, regular, human Injection                                                                     |
| RxNorm     | 2179744     | 100 ML insulin, regular, human 1 UNT/ML Injection                                                     |
| RxNorm     | 2179745     | Myxredlin                                                                                             |
| RxNorm     | 2179746     | insulin, regular, human 1 UNT/ML [Myxredlin]                                                          |
| RxNorm     | 2179747     | insulin, regular, human Injection [Myxredlin]                                                         |
| RxNorm     | 2179748     | Myxredlin Injectable Product                                                                          |
| RxNorm     | 2179749     | 100 ML insulin, regular, human 1 UNT/ML Injection [Myxredlin]                                         |
| RxNorm     | 2179750     | insulin, regular, human 1 UNT/ML Injection                                                            |
| RxNorm     | 2179751     | insulin, regular, human 1 UNT/ML Injection [Myxredlin]                                                |
| RxNorm     | 2206090     | 3 ML insulin, regular, human 100 UNT/ML Pen Injector                                                  |
| RxNorm     | 2206091     | insulin, regular, human Pen Injector [Novolin R]                                                      |
| RxNorm     | 2206092     | 3 ML insulin, regular, human 100 UNT/ML Pen Injector [Novolin R]                                      |
| RxNorm     | 2206093     | insulin, regular, human 100 UNT/ML Pen Injector                                                       |
| RxNorm     | 2206094     | insulin, regular, human 100 UNT/ML Pen Injector [Novolin R]                                           |
| RxNorm     | 247511      | insulin isophane, human 90 UNT/ML / insulin, regular, human 10 UNT/ML Injectable Suspension           |
| RxNorm     | 247512      | insulin isophane, human 80 UNT/ML / insulin, regular, human 20 UNT/ML Injectable Suspension           |
| RxNorm     | 247513      | insulin isophane, human 60 UNT/ML / insulin, regular, human 40 UNT/ML Injectable Suspension           |
| RxNorm     | 249026      | insulin, regular, human 40 UNT/ML Injectable Solution                                                 |
| RxNorm     | 245264      | insulin isophane, human 85 UNT/ML / insulin, regular, human 15 UNT/ML Injectable Suspension           |
| RxNorm     | 245265      | insulin isophane, human 50 UNT/ML / insulin, regular, human 50 UNT/ML Injectable Suspension           |
| RxNorm     | 249220      | insulin, regular, human 500 UNT/ML Injectable Solution                                                |
| RxNorm     | 311033      | insulin, regular, human 100 UNT/ML Injectable Solution [Novolin R]                                    |
| RxNorm     | 311034      | insulin, regular, human 100 UNT/ML Injectable Solution                                                |
| RxNorm     | 311035      | insulin, regular, human 100 UNT/ML Injectable Solution [Velosulin]                                    |
| RxNorm     | 311036      | insulin, regular, human 100 UNT/ML Injectable Solution [Humulin R]                                    |
| RxNorm     | 311048      | insulin isophane, human 70 UNT/ML / insulin, regular, human 30 UNT/ML Injectable Suspension           |
| RxNorm     | 340325      | insulin, regular, human 100 UNT/ML                                                                    |
| RxNorm     | 340326      | insulin, regular, human 40 UNT/ML                                                                     |

Continued on next page

**Table17 – continued from previous page**

| CodeSystem | ConceptCode | ConceptName                                                                                 |
|------------|-------------|---------------------------------------------------------------------------------------------|
| RxNorm     | 340327      | insulin, regular, human 500 UNT/ML                                                          |
| RxNorm     | 351859      | insulin, regular, human 500 UNT/ML Injectable Solution [Humulin R]                          |
| RxNorm     | 362622      | insulin, regular, human Injectable Solution [Humulin R]                                     |
| RxNorm     | 363120      | insulin, regular, human Injectable Solution [Velosulin]                                     |
| RxNorm     | 363221      | insulin, regular, human Injectable Solution [Novolin R]                                     |
| RxNorm     | 343083      | insulin, regular, human 30 UNT/ML                                                           |
| RxNorm     | 343258      | insulin, regular, human 50 UNT/ML                                                           |
| RxNorm     | 360894      | insulin, regular, human 25 UNT/ML                                                           |
| RxNorm     | 359125      | insulin, regular, human 15 UNT/ML                                                           |
| RxNorm     | 359126      | insulin, regular, human 10 UNT/ML                                                           |
| RxNorm     | 359127      | insulin, regular, human 20 UNT/ML                                                           |
| RxNorm     | 365668      | insulin isophane / insulin, regular, human Injectable Suspension [Pur-In Mix]               |
| RxNorm     | 365672      | insulin isophane / insulin, regular, human Injectable Suspension [Novolin]                  |
| RxNorm     | 365679      | insulin isophane / insulin, regular, human Injectable Suspension [Humulin]                  |
| RxNorm     | 392660      | insulin isophane, human 75 UNT/ML / insulin, regular, human 25 UNT/ML Injectable Suspension |
| RxNorm     | 378857      | insulin isophane / insulin, regular, human Injectable Suspension                            |
| RxNorm     | 376915      | insulin, regular, human Injectable Solution                                                 |
| RxNorm     | 412978      | insulin isophane, human 16 UNT/ML / insulin, regular, human 24 UNT/ML Injectable Suspension |
| RxNorm     | 379734      | insulin, regular, human Injectable Solution [Humulin S]                                     |
| RxNorm     | 379740      | insulin isophane / insulin, regular, human Injectable Suspension [Human Mixtard]            |
| RxNorm     | 379744      | insulin, regular, human Injectable Solution [Human Actrapid]                                |
| RxNorm     | 379747      | insulin, regular, human Injectable Solution [Human Actrapid Penfill]                        |
| RxNorm     | 385895      | Pur-In Neutral                                                                              |
| RxNorm     | 385896      | insulin, regular, human Injectable Solution [Pur-In Neutral]                                |
| RxNorm     | 412453      | insulin, regular, human 5 UNT/ML Injectable Solution                                        |
| RxNorm     | 415088      | insulin isophane, human 28 UNT/ML / insulin, regular, human 12 UNT/ML Injectable Suspension |
| RxNorm     | 415089      | insulin isophane, human 30 UNT/ML / insulin, regular, human 10 UNT/ML Injectable Suspension |
| RxNorm     | 415090      | insulin isophane, human 34 UNT/ML / insulin, regular, human 6 UNT/ML Injectable Suspension  |
| RxNorm     | 415184      | insulin isophane, human 32 UNT/ML / insulin, regular, human 8 UNT/ML Injectable Suspension  |

Continued on next page

**Table17 – continued from previous page**

| CodeSystem | ConceptCode | ConceptName                                                                                |
|------------|-------------|--------------------------------------------------------------------------------------------|
| RxNorm     | 415185      | insulin isophane, human 36 UNT/ML / insulin, regular, human 4 UNT/ML Injectable Suspension |
| RxNorm     | 440399      | insulin, regular, human 24 UNT/ML                                                          |
| RxNorm     | 440650      | insulin, regular, human 12 UNT/ML                                                          |
| RxNorm     | 440653      | insulin, regular, human 6 UNT/ML                                                           |
| RxNorm     | 440654      | insulin, regular, human 5 UNT/ML                                                           |
| RxNorm     | 451437      | insulin, regular, human 8 UNT/ML                                                           |
| RxNorm     | 451439      | insulin, regular, human 4 UNT/ML                                                           |
| RxNorm     | 564395      | insulin isophane, human 85 UNT/ML / insulin, regular, human 15 UNT/ML [Pur-In Mix]         |
| RxNorm     | 564396      | insulin isophane, human 75 UNT/ML / insulin, regular, human 25 UNT/ML [Pur-In Mix]         |
| RxNorm     | 564397      | insulin isophane, human 50 UNT/ML / insulin, regular, human 50 UNT/ML [Pur-In Mix]         |
| RxNorm     | 564399      | insulin isophane, human 90 UNT/ML / insulin, regular, human 10 UNT/ML [Humulin]            |
| RxNorm     | 564400      | insulin isophane, human 80 UNT/ML / insulin, regular, human 20 UNT/ML [Humulin]            |
| RxNorm     | 564401      | insulin isophane, human 60 UNT/ML / insulin, regular, human 40 UNT/ML [Humulin]            |
| RxNorm     | 5459        | Humulin S                                                                                  |
| RxNorm     | 564531      | insulin isophane, human 50 UNT/ML / insulin, regular, human 50 UNT/ML [Humulin]            |
| RxNorm     | 564601      | insulin isophane, human 90 UNT/ML / insulin, regular, human 10 UNT/ML [Human Mixtard]      |
| RxNorm     | 564602      | insulin isophane, human 80 UNT/ML / insulin, regular, human 20 UNT/ML [Human Mixtard]      |
| RxNorm     | 564603      | insulin isophane, human 70 UNT/ML / insulin, regular, human 30 UNT/ML [Human Mixtard]      |
| RxNorm     | 564605      | insulin isophane, human 60 UNT/ML / insulin, regular, human 40 UNT/ML [Human Mixtard]      |
| RxNorm     | 564766      | insulin, regular, human 100 UNT/ML [Pur-In Neutral]                                        |
| RxNorm     | 564820      | insulin, regular, human 100 UNT/ML [Human Actrapid Penfill]                                |
| RxNorm     | 564881      | insulin, regular, human 100 UNT/ML [Human Actrapid]                                        |
| RxNorm     | 564882      | insulin, regular, human 100 UNT/ML [Humulin S]                                             |
| RxNorm     | 565176      | insulin isophane, human 50 UNT/ML / insulin, regular, human 50 UNT/ML [Human Mixtard]      |
| RxNorm     | 575146      | insulin, regular, human 100 UNT/ML [Novolin R]                                             |
| RxNorm     | 575147      | insulin, regular, human 100 UNT/ML [Velosulin]                                             |
| RxNorm     | 575148      | insulin, regular, human 100 UNT/ML [Humulin R]                                             |
| RxNorm     | 575628      | insulin, regular, human 500 UNT/ML [Humulin R]                                             |

Continued on next page

**Table17 – continued from previous page**

| CodeSystem | ConceptCode | ConceptName                                                                     |
|------------|-------------|---------------------------------------------------------------------------------|
| RxNorm     | 573330      | insulin isophane, human 70 UNT/ML / insulin, regular, human 30 UNT/ML [Humulin] |
| RxNorm     | 573331      | insulin isophane, human 70 UNT/ML / insulin, regular, human 30 UNT/ML [Novolin] |

### 1.5.3 Sulfonylurea

Table 18: Concept codes used to identify Sulfonylurea medications.

| CodeSystem | ConceptCode | ConceptName                                                   |
|------------|-------------|---------------------------------------------------------------|
| RxNorm     | 10633       | tolazamide                                                    |
| RxNorm     | 25789       | glimepiride                                                   |
| RxNorm     | 4815        | glyburide                                                     |
| RxNorm     | 4821        | glipizide                                                     |
| RxNorm     | 368567      | Glipizide / Metformin Oral Tablet [metaglip]                  |
| RxNorm     | 352301      | Glipizide 5 MG / Metformin 500 MG Oral Tablet [metaglip]      |
| RxNorm     | 352302      | Glipizide 2.5 MG / Metformin 250 MG Oral Tablet [metaglip]    |
| RxNorm     | 379801      | Glipizide 24 Hour Extended Release Tablet [Glucotrol XL]      |
| RxNorm     | 369372      | Glyburide Oral Tablet [Glynase Pres-Tab]                      |
| RxNorm     | 379805      | Glipizide 24 Hour Extended Release Tablet                     |
| RxNorm     | 368169      | Glyburide / Metformin Oral Tablet [Glucovance]                |
| RxNorm     | 352300      | Glipizide 2.5 MG / Metformin 500 MG Oral Tablet [metaglip]    |
| RxNorm     | 541898      | Glyburide 1.5 MG Oral Tablet [Glyguride]                      |
| RxNorm     | 542065      | Glyburide 6 MG [Gyburide]                                     |
| RxNorm     | 575998      | Glipizide 2.5 MG / Metformin 250 MG [metaglip]                |
| RxNorm     | 575996      | Glipizide 2.5 MG / Metformin 500 MG [metaglip]                |
| RxNorm     | 541896      | Glyburide 1.5 MG [Glyguride]                                  |
| RxNorm     | 542067      | Glyburide 6 MG Oral Tablet [Gyburide]                         |
| RxNorm     | 542066      | Glyburide Oral Tablet [Gyburide]                              |
| RxNorm     | 541897      | Glyburide Oral Tablet [Glyguride]                             |
| RxNorm     | 575997      | Glipizide 5 MG / Metformin 500 MG [metaglip]                  |
| RxNorm     | 615211      | glimepiride / rosiglitazone Oral Tablet [Avandaryl]           |
| RxNorm     | 668563      | glimepiride 4 MG / pioglitazone 30 MG Oral Tablet [Duetact]   |
| RxNorm     | 706933      | glimepiride 2 MG / rosiglitazone 8 MG Oral Tablet [Avandaryl] |
| RxNorm     | 668555      | glimepiride / pioglitazone Oral Tablet [Duetact]              |
| RxNorm     | 615918      | glimepiride 4 MG / rosiglitazone 4 MG [Avandaryl]             |

Continued on next page

**Table18 – continued from previous page**

| CodeSystem | ConceptCode | ConceptName                                                   |
|------------|-------------|---------------------------------------------------------------|
| RxNorm     | 615212      | glimepiride 1 MG / rosiglitazone 4 MG Oral Tablet [Avandaryl] |
| RxNorm     | 668554      | glimepiride 2 MG / pioglitazone 30 MG [Duetact]               |
| RxNorm     | 668562      | glimepiride 4 MG / pioglitazone 30 MG [Duetact]               |
| RxNorm     | 700836      | Glipizide 5 MG Extended Release Tablet                        |
| RxNorm     | 706932      | glimepiride 2 MG / rosiglitazone 8 MG [Avandaryl]             |
| RxNorm     | 731456      | glimepiride / pioglitazone Oral Tablet [Duetact 30/4]         |
| RxNorm     | 615214      | glimepiride 2 MG / rosiglitazone 4 MG Oral Tablet [Avandaryl] |
| RxNorm     | 615919      | glimepiride 4 MG / rosiglitazone 4 MG Oral Tablet [Avandaryl] |
| RxNorm     | 615210      | glimepiride 1 MG / rosiglitazone 4 MG [Avandaryl]             |
| RxNorm     | 668556      | glimepiride 2 MG / pioglitazone 30 MG Oral Tablet [Duetact]   |
| RxNorm     | 847723      | glimepiride / rosiglitazone Oral Tablet [Avandaryl 8/4]       |
| RxNorm     | 847719      | glimepiride / rosiglitazone Oral Tablet [Avandaryl 8/2]       |
| RxNorm     | 707181      | glimepiride 4 MG / rosiglitazone 8 MG [Avandaryl]             |
| RxNorm     | 615213      | glimepiride 2 MG / rosiglitazone 4 MG [Avandaryl]             |
| RxNorm     | 707182      | glimepiride 4 MG / rosiglitazone 8 MG Oral Tablet [Avandaryl] |
| RxNorm     | 849593      | Glipizide / Metformin Oral Tablet [Metaglip 2.5 MG/500 MG]    |
| RxNorm     | 847715      | glimepiride / rosiglitazone Oral Tablet [Avandaryl 4/1]       |
| RxNorm     | 847711      | glimepiride / rosiglitazone Oral Tablet [Avandaryl 4/2]       |
| RxNorm     | 849589      | Glipizide / Metformin Oral Tablet [Metaglip 5 MG/500 MG]      |
| RxNorm     | 861746      | Glyburide / Metformin Oral Tablet [Glucovance 1.25 MG/250 MG] |
| RxNorm     | 861751      | Glyburide / Metformin Oral Tablet [Glucovance 2.5 MG/500 MG]  |
| RxNorm     | 1185627     | Metaglip 5 MG/500 MG Oral Product                             |
| RxNorm     | 1175663     | Avandaryl 8/2 Pill                                            |
| RxNorm     | 1175657     | Avandaryl 4/1 Pill                                            |
| RxNorm     | 1175661     | Avandaryl 4/4 Pill                                            |
| RxNorm     | 1008873     | glyburide / phenformin                                        |
| RxNorm     | 102845      | glyburide 5 MG Oral Tablet [Daonil]                           |
| RxNorm     | 105371      | glyburide 2.5 MG Oral Tablet [Calabren]                       |
| RxNorm     | 105372      | glyburide 5 MG Oral Tablet [Calabren]                         |
| RxNorm     | 105373      | glipizide 5 MG Oral Tablet [Minidiab]                         |
| RxNorm     | 1157121     | tolazamide Oral Product                                       |
| RxNorm     | 1157122     | tolazamide Pill                                               |
| RxNorm     | 1156197     | glyburide / metformin Pill                                    |
| RxNorm     | 1156198     | glyburide / phenformin Oral Product                           |

Continued on next page

**Table18 – continued from previous page**

| CodeSystem | ConceptCode | ConceptName                              |
|------------|-------------|------------------------------------------|
| RxNorm     | 1156199     | glyburide / phenformin Pill              |
| RxNorm     | 1156200     | glyburide Oral Product                   |
| RxNorm     | 1156201     | glyburide Pill                           |
| RxNorm     | 1157240     | glimepiride / pioglitazone Oral Product  |
| RxNorm     | 1157241     | glimepiride / pioglitazone Pill          |
| RxNorm     | 1157242     | glimepiride / rosiglitazone Oral Product |
| RxNorm     | 1157243     | glimepiride / rosiglitazone Pill         |
| RxNorm     | 1157244     | glimepiride Oral Product                 |
| RxNorm     | 1157245     | glimepiride Pill                         |
| RxNorm     | 1166403     | Duetact Oral Product                     |
| RxNorm     | 1166404     | Duetact Pill                             |
| RxNorm     | 1165205     | glipizide / metformin Oral Product       |
| RxNorm     | 1165206     | glipizide / metformin Pill               |
| RxNorm     | 1165207     | glipizide Oral Product                   |
| RxNorm     | 1165208     | glipizide Pill                           |
| RxNorm     | 1165845     | glyburide / metformin Oral Product       |
| RxNorm     | 1170663     | Amaryl Oral Product                      |
| RxNorm     | 1170664     | Amaryl Pill                              |
| RxNorm     | 1170866     | Calabren Oral Product                    |
| RxNorm     | 1170867     | Calabren Pill                            |
| RxNorm     | 1171148     | Euglucon Oral Product                    |
| RxNorm     | 1171149     | Euglucon Pill                            |
| RxNorm     | 1171233     | Glibenese Oral Product                   |
| RxNorm     | 1171234     | Glibenese Pill                           |
| RxNorm     | 1171246     | Glucotrol Oral Product                   |
| RxNorm     | 1171247     | Glucotrol Pill                           |
| RxNorm     | 1171248     | Glucovance Oral Product                  |
| RxNorm     | 1171249     | Glucovance Pill                          |
| RxNorm     | 1171929     | Glycron Oral Product                     |
| RxNorm     | 1171930     | Glycron Pill                             |
| RxNorm     | 1171933     | Glynase Oral Product                     |
| RxNorm     | 1171934     | Glynase Pill                             |
| RxNorm     | 1171919     | Glyburase Oral Product                   |
| RxNorm     | 1171920     | Glyburase Pill                           |
| RxNorm     | 1175658     | Avandaryl Oral Product                   |
| RxNorm     | 1175659     | Avandaryl Pill                           |
| RxNorm     | 1175878     | Diabeta Oral Product                     |
| RxNorm     | 1175879     | Diabeta Pill                             |
| RxNorm     | 1175880     | Diabetamide Oral Product                 |
| RxNorm     | 1175881     | Diabetamide Pill                         |
| RxNorm     | 1168162     | Daonil Oral Product                      |
| RxNorm     | 1168163     | Daonil Pill                              |
| RxNorm     | 1179291     | Minidiab Oral Product                    |

Continued on next page



**Table18 – continued from previous page**

| CodeSystem | ConceptCode | ConceptName                             |
|------------|-------------|-----------------------------------------|
| RxNorm     | 1179292     | Minidiab Pill                           |
| RxNorm     | 1185049     | Metaglip Oral Product                   |
| RxNorm     | 1179740     | Malix Oral Product                      |
| RxNorm     | 1179741     | Malix Pill                              |
| RxNorm     | 1177973     | Tolinase Oral Product                   |
| RxNorm     | 1177974     | Tolinase Pill                           |
| RxNorm     | 1186169     | Libanil Oral Product                    |
| RxNorm     | 1186170     | Libanil Pill                            |
| RxNorm     | 1178082     | Micronase Oral Product                  |
| RxNorm     | 1178083     | Micronase Pill                          |
| RxNorm     | 1178368     | Semi-Daonil Oral Product                |
| RxNorm     | 1178369     | Semi-Daonil Pill                        |
| RxNorm     | 1185624     | Metaglip Pill                           |
| RxNorm     | 1361492     | glimepiride 6 MG                        |
| RxNorm     | 1361493     | glimepiride 6 MG Oral Tablet            |
| RxNorm     | 1361494     | glimepiride 8 MG                        |
| RxNorm     | 1361495     | glimepiride 8 MG Oral Tablet            |
| RxNorm     | 151466      | Calabren                                |
| RxNorm     | 151615      | Diabetamide                             |
| RxNorm     | 151725      | Euglucon                                |
| RxNorm     | 151822      | Glibenese                               |
| RxNorm     | 153842      | glimepiride 3 MG Oral Tablet            |
| RxNorm     | 153843      | glimepiride 1 MG Oral Tablet [Amaryl]   |
| RxNorm     | 153844      | glimepiride 3 MG Oral Tablet [Amaryl]   |
| RxNorm     | 153845      | glimepiride 4 MG Oral Tablet [Amaryl]   |
| RxNorm     | 152651      | Malix                                   |
| RxNorm     | 153591      | glimepiride 2 MG Oral Tablet [Amaryl]   |
| RxNorm     | 153592      | Amaryl                                  |
| RxNorm     | 197737      | glyburide 1.25 MG Oral Tablet           |
| RxNorm     | 199245      | glimepiride 1 MG Oral Tablet            |
| RxNorm     | 199246      | glimepiride 2 MG Oral Tablet            |
| RxNorm     | 199247      | glimepiride 4 MG Oral Tablet            |
| RxNorm     | 198291      | tolazamide 100 MG Oral Tablet           |
| RxNorm     | 198292      | tolazamide 250 MG Oral Tablet           |
| RxNorm     | 198293      | tolazamide 500 MG Oral Tablet           |
| RxNorm     | 203289      | Micronase                               |
| RxNorm     | 203295      | Diabeta                                 |
| RxNorm     | 203296      | Daonil                                  |
| RxNorm     | 201921      | glipizide 5 MG Oral Tablet [Glibenese]  |
| RxNorm     | 201922      | glipizide 2.5 MG Oral Tablet [Minidiab] |
| RxNorm     | 203679      | Minidiab                                |
| RxNorm     | 203680      | Glucotrol                               |
| RxNorm     | 201056      | glyburide 2.5 MG Oral Tablet [Libanil]  |

Continued on next page

**Table18 – continued from previous page**

| CodeSystem | ConceptCode | ConceptName                                                   |
|------------|-------------|---------------------------------------------------------------|
| RxNorm     | 201057      | glyburide 2.5 MG Oral Tablet [Semi-Daonil]                    |
| RxNorm     | 201058      | glyburide 2.5 MG Oral Tablet [Euglucon]                       |
| RxNorm     | 201059      | glyburide 2.5 MG Oral Tablet [Malix]                          |
| RxNorm     | 201060      | glyburide 2.5 MG Oral Tablet [Diabetamide]                    |
| RxNorm     | 201061      | glyburide 5 MG Oral Tablet [Libanil]                          |
| RxNorm     | 201062      | glyburide 5 MG Oral Tablet [Euglucon]                         |
| RxNorm     | 201063      | glyburide 5 MG Oral Tablet [Malix]                            |
| RxNorm     | 201064      | glyburide 5 MG Oral Tablet [Diabetamide]                      |
| RxNorm     | 205828      | glipizide 5 MG Oral Tablet [Glucotrol]                        |
| RxNorm     | 205830      | glipizide 10 MG Oral Tablet [Glucotrol]                       |
| RxNorm     | 205872      | glyburide 1.25 MG Oral Tablet [Diabeta]                       |
| RxNorm     | 205873      | glyburide 1.25 MG Oral Tablet [Micronase]                     |
| RxNorm     | 205875      | glyburide 2.5 MG Oral Tablet [Diabeta]                        |
| RxNorm     | 205876      | glyburide 2.5 MG Oral Tablet [Micronase]                      |
| RxNorm     | 205879      | glyburide 5 MG Oral Tablet [Diabeta]                          |
| RxNorm     | 205880      | glyburide 5 MG Oral Tablet [Micronase]                        |
| RxNorm     | 207953      | tolazamide 100 MG Oral Tablet [Tolinase]                      |
| RxNorm     | 207954      | tolazamide 250 MG Oral Tablet [Tolinase]                      |
| RxNorm     | 207955      | tolazamide 500 MG Oral Tablet [Tolinase]                      |
| RxNorm     | 844809      | glipizide 2.5 MG Extended Release Oral Tablet                 |
| RxNorm     | 844824      | glipizide 5 MG Extended Release Oral Tablet                   |
| RxNorm     | 844827      | glipizide 10 MG Extended Release Oral Tablet                  |
| RxNorm     | 849585      | glipizide / metformin Oral Tablet [Metaglip]                  |
| RxNorm     | 847708      | glimepiride 4 MG / rosiglitazone 4 MG Oral Tablet [Avandaryl] |
| RxNorm     | 847706      | glimepiride 4 MG / rosiglitazone 4 MG [Avandaryl]             |
| RxNorm     | 847707      | glimepiride / rosiglitazone Oral Tablet [Avandaryl]           |
| RxNorm     | 847710      | glimepiride 2 MG / rosiglitazone 4 MG [Avandaryl]             |
| RxNorm     | 847712      | glimepiride 2 MG / rosiglitazone 4 MG Oral Tablet [Avandaryl] |
| RxNorm     | 847714      | glimepiride 1 MG / rosiglitazone 4 MG [Avandaryl]             |
| RxNorm     | 847716      | glimepiride 1 MG / rosiglitazone 4 MG Oral Tablet [Avandaryl] |
| RxNorm     | 847718      | glimepiride 2 MG / rosiglitazone 8 MG [Avandaryl]             |
| RxNorm     | 847720      | glimepiride 2 MG / rosiglitazone 8 MG Oral Tablet [Avandaryl] |
| RxNorm     | 847722      | glimepiride 4 MG / rosiglitazone 8 MG [Avandaryl]             |
| RxNorm     | 847724      | glimepiride 4 MG / rosiglitazone 8 MG Oral Tablet [Avandaryl] |
| RxNorm     | 861731      | glipizide 2.5 MG / metformin hydrochloride 250 MG Oral Tablet |
| RxNorm     | 861732      | glipizide 2.5 MG / metformin hydrochloride 250 MG [Metaglip]  |

Continued on next page

**Table18 – continued from previous page**

| CodeSystem | ConceptCode | ConceptName                                                                  |
|------------|-------------|------------------------------------------------------------------------------|
| RxNorm     | 861733      | glipizide 2.5 MG / metformin hydrochloride 250 MG Oral Tablet [Metaglip]     |
| RxNorm     | 861736      | glipizide 2.5 MG / metformin hydrochloride 500 MG Oral Tablet                |
| RxNorm     | 861737      | glipizide 2.5 MG / metformin hydrochloride 500 MG [Metaglip]                 |
| RxNorm     | 861738      | glipizide 2.5 MG / metformin hydrochloride 500 MG Oral Tablet [Metaglip]     |
| RxNorm     | 861740      | glipizide 5 MG / metformin hydrochloride 500 MG Oral Tablet                  |
| RxNorm     | 861741      | glipizide 5 MG / metformin hydrochloride 500 MG [Metaglip]                   |
| RxNorm     | 861742      | glipizide 5 MG / metformin hydrochloride 500 MG Oral Tablet [Metaglip]       |
| RxNorm     | 861743      | glyburide 1.25 MG / metformin hydrochloride 250 MG Oral Tablet               |
| RxNorm     | 861745      | glyburide 1.25 MG / metformin hydrochloride 250 MG [Glucoavance]             |
| RxNorm     | 861747      | glyburide 1.25 MG / metformin hydrochloride 250 MG Oral Tablet [Glucoavance] |
| RxNorm     | 861748      | glyburide 2.5 MG / metformin hydrochloride 500 MG Oral Tablet                |
| RxNorm     | 861750      | glyburide 2.5 MG / metformin hydrochloride 500 MG [Glucoavance]              |
| RxNorm     | 861752      | glyburide 2.5 MG / metformin hydrochloride 500 MG Oral Tablet [Glucoavance]  |
| RxNorm     | 861753      | glyburide 5 MG / metformin hydrochloride 500 MG Oral Tablet                  |
| RxNorm     | 861755      | glyburide 5 MG / metformin hydrochloride 500 MG [Glucoavance]                |
| RxNorm     | 861756      | glyburide / metformin Oral Tablet [Glucoavance]                              |
| RxNorm     | 861757      | glyburide 5 MG / metformin hydrochloride 500 MG Oral Tablet [Glucoavance]    |
| RxNorm     | 881404      | Glynase                                                                      |
| RxNorm     | 881405      | glyburide 1.5 MG [Glynase]                                                   |
| RxNorm     | 881406      | glyburide Oral Tablet [Glynase]                                              |
| RxNorm     | 881407      | glyburide 1.5 MG Oral Tablet [Glynase]                                       |
| RxNorm     | 881408      | glyburide 3 MG [Glynase]                                                     |
| RxNorm     | 881409      | glyburide 3 MG Oral Tablet [Glynase]                                         |
| RxNorm     | 881410      | glyburide 6 MG [Glynase]                                                     |
| RxNorm     | 881411      | glyburide 6 MG Oral Tablet [Glynase]                                         |
| RxNorm     | 865567      | glipizide Extended Release Oral Tablet [Glucotrol]                           |

Continued on next page

**Table18 – continued from previous page**

| CodeSystem | ConceptCode | ConceptName                                                     |
|------------|-------------|-----------------------------------------------------------------|
| RxNorm     | 865568      | 24 HR glipizide 10 MG Extended Release Oral Tablet [Glucotrol]  |
| RxNorm     | 865569      | glipizide 10 MG Extended Release Oral Tablet [Glucotrol]        |
| RxNorm     | 865570      | glipizide 2.5 MG [Glucotrol]                                    |
| RxNorm     | 865571      | 24 HR glipizide 2.5 MG Extended Release Oral Tablet [Glucotrol] |
| RxNorm     | 865572      | glipizide 2.5 MG Extended Release Oral Tablet [Glucotrol]       |
| RxNorm     | 865573      | 24 HR glipizide 5 MG Extended Release Oral Tablet [Glucotrol]   |
| RxNorm     | 865574      | glipizide 5 MG Extended Release Oral Tablet [Glucotrol]         |
| RxNorm     | 93312       | glyburide Oral Tablet [Micronase]                               |
| RxNorm     | 284433      | Glyburide 5 MG / Metformin 500 MG Oral Tablet [Glucovance]      |
| RxNorm     | 284432      | Glyburide 2.5 MG / Metformin 500 MG Oral Tablet [Glucovance]    |
| RxNorm     | 351273      | Glipizide 2.5 MG / Metformin 500 MG Oral Tablet                 |
| RxNorm     | 351275      | Glipizide 2.5 MG / Metformin 250 MG Oral Tablet                 |
| RxNorm     | 261311      | Glipizide 2.5 MG 24 Hour Extended Release Tablet [Glucotrol XL] |
| RxNorm     | 205829      | Glipizide 5 MG 24 Hour Extended Release Tablet [Glucotrol XL]   |
| RxNorm     | 284431      | Glyburide 1.25 MG / Metformin 250 MG Oral Tablet [Glucovance]   |
| RxNorm     | 205881      | Glyburide 6 MG Oral Tablet [Glynase Pres-Tab]                   |
| RxNorm     | 205877      | Glyburide 3 MG Oral Tablet [Glynase Pres-Tab]                   |
| RxNorm     | 205831      | Glipizide 10 MG 24 Hour Extended Release Tablet [Glucotrol XL]  |
| RxNorm     | 205874      | Glyburide 1.5 MG Oral Tablet [Glynase Pres-Tab]                 |
| RxNorm     | 351274      | Glipizide 5 MG / Metformin 500 MG Oral Tablet                   |
| RxNorm     | 566719      | Glipizide 5 MG [Glucotrol XL]                                   |
| RxNorm     | 566721      | Glipizide 10 MG [Glucotrol XL]                                  |
| RxNorm     | 574533      | Glipizide 2.5 MG [Glucotrol XL]                                 |
| RxNorm     | 566763      | Glyburide 1.5 MG [Glynase Pres-Tab]                             |
| RxNorm     | 574869      | Glyburide 1.25 MG / Metformin 250 MG [Glucovance]               |
| RxNorm     | 566770      | Glyburide 6 MG [Glynase Pres-Tab]                               |
| RxNorm     | 574871      | Glyburide 5 MG / Metformin 500 MG [Glucovance]                  |
| RxNorm     | 566766      | Glyburide 3 MG [Glynase Pres-Tab]                               |
| RxNorm     | 574870      | Glyburide 2.5 MG / Metformin 500 MG [Glucovance]                |
| RxNorm     | 310538      | Glyburide 5 MG / Metformin 500 MG Oral Tablet                   |
| RxNorm     | 310535      | Glyburide 2.5 MG / Metformin 500 MG Oral Tablet                 |
| RxNorm     | 310533      | Glyburide 1.25 MG / Metformin 250 MG Oral Tablet                |
| RxNorm     | 1185628     | Metaglip 5 MG/500 MG Pill                                       |
| RxNorm     | 1175664     | Avandaryl 8/4 Oral Product                                      |

Continued on next page

**Table18 – continued from previous page**

| CodeSystem | ConceptCode | ConceptName                                         |
|------------|-------------|-----------------------------------------------------|
| RxNorm     | 1166405     | Duetact 30/4 Oral Product                           |
| RxNorm     | 1185625     | Metaglip 2.5 MG/500 MG Oral Product                 |
| RxNorm     | 1171251     | Glucovance 2.5 MG/500 MG Pill                       |
| RxNorm     | 1166406     | Duetact 30/4 Pill                                   |
| RxNorm     | 1185626     | Metaglip 2.5 MG/500 MG Pill                         |
| RxNorm     | 1175660     | Avandaryl 4/4 Oral Product                          |
| RxNorm     | 1175662     | Avandaryl 8/2 Oral Product                          |
| RxNorm     | 1171253     | Glucovance 5 MG/500 MG Pill                         |
| RxNorm     | 1171250     | Glucovance 2.5 MG/500 MG Oral Product               |
| RxNorm     | 1175665     | Avandaryl 8/4 Pill                                  |
| RxNorm     | 1171252     | Glucovance 5 MG/500 MG Oral Product                 |
| RxNorm     | 1175656     | Avandaryl 4/1 Oral Product                          |
| RxNorm     | 220338      | Tolinase                                            |
| RxNorm     | 225613      | Semi-Daonil                                         |
| RxNorm     | 246391      | glyburide 2.5 MG / phenformin 25 MG Oral Tablet     |
| RxNorm     | 246524      | glyburide 5 MG / phenformin 50 MG Oral Tablet       |
| RxNorm     | 250919      | glyburide 2.5 MG / metformin 400 MG Oral Tablet     |
| RxNorm     | 284743      | Glucovance                                          |
| RxNorm     | 261351      | glyburide 4.5 MG Oral Tablet [Glycron]              |
| RxNorm     | 252960      | glyburide 4.5 MG Oral Tablet                        |
| RxNorm     | 285129      | glyburide / metformin                               |
| RxNorm     | 261532      | Glycron                                             |
| RxNorm     | 261974      | glyburide 3 MG Oral Tablet [Glycron]                |
| RxNorm     | 260286      | glyburide 1.5 MG Oral Tablet [Glycron]              |
| RxNorm     | 260287      | glyburide 6 MG Oral Tablet [Glycron]                |
| RxNorm     | 310488      | glipizide 10 MG Oral Tablet                         |
| RxNorm     | 310489      | 24 HR glipizide 2.5 MG Extended Release Oral Tablet |
| RxNorm     | 310490      | glipizide 5 MG Oral Tablet                          |
| RxNorm     | 310534      | glyburide 2.5 MG Oral Tablet                        |
| RxNorm     | 310536      | glyburide 3 MG Oral Tablet                          |
| RxNorm     | 310537      | glyburide 5 MG Oral Tablet                          |
| RxNorm     | 310539      | glyburide 6 MG Oral Tablet                          |
| RxNorm     | 313418      | tolazamide 250 MG Oral Capsule                      |
| RxNorm     | 314000      | glyburide 1.5 MG Oral Tablet                        |
| RxNorm     | 314006      | 24 HR glipizide 5 MG Extended Release Oral Tablet   |
| RxNorm     | 315107      | 24 HR glipizide 10 MG Extended Release Oral Tablet  |
| RxNorm     | 316832      | tolazamide 100 MG                                   |
| RxNorm     | 316833      | tolazamide 250 MG                                   |
| RxNorm     | 316834      | tolazamide 500 MG                                   |
| RxNorm     | 315978      | glimepiride 1 MG                                    |
| RxNorm     | 315979      | glimepiride 4 MG                                    |
| RxNorm     | 315980      | glipizide 5 MG                                      |
| RxNorm     | 315987      | glyburide 1.25 MG                                   |

Continued on next page

**Table18 – continued from previous page**

| CodeSystem | ConceptCode | ConceptName                                    |
|------------|-------------|------------------------------------------------|
| RxNorm     | 315988      | glyburide 1.5 MG                               |
| RxNorm     | 315989      | glyburide 2.5 MG                               |
| RxNorm     | 315990      | glyburide 3 MG                                 |
| RxNorm     | 315991      | glyburide 5 MG                                 |
| RxNorm     | 315992      | glyburide 6 MG                                 |
| RxNorm     | 317379      | glipizide 10 MG                                |
| RxNorm     | 317637      | glimepiride 2 MG                               |
| RxNorm     | 331496      | glyburide 4.5 MG                               |
| RxNorm     | 330349      | glipizide 2.5 MG                               |
| RxNorm     | 352381      | glipizide / metformin                          |
| RxNorm     | 352764      | Metaglip                                       |
| RxNorm     | 367762      | glimepiride Oral Tablet [Amaryl]               |
| RxNorm     | 368204      | glyburide Oral Tablet [Glycron]                |
| RxNorm     | 369304      | tolazamide Oral Tablet [Tolinase]              |
| RxNorm     | 369373      | glyburide Oral Tablet [Diabeta]                |
| RxNorm     | 369500      | glipizide Oral Tablet [Glucotrol]              |
| RxNorm     | 369557      | glyburide Oral Tablet [Semi-Daonil]            |
| RxNorm     | 369562      | glyburide Oral Tablet [Daonil]                 |
| RxNorm     | 374635      | glyburide / metformin Oral Tablet              |
| RxNorm     | 375952      | tolazamide Oral Capsule                        |
| RxNorm     | 379803      | glipizide Oral Tablet [Glibenese]              |
| RxNorm     | 379804      | glipizide 2.5 MG Oral Tablet                   |
| RxNorm     | 380849      | glimepiride 3 MG                               |
| RxNorm     | 372319      | glimepiride Oral Tablet                        |
| RxNorm     | 372320      | glipizide Oral Tablet                          |
| RxNorm     | 372333      | glyburide Oral Tablet                          |
| RxNorm     | 372334      | glyburide / phenformin Oral Tablet             |
| RxNorm     | 378730      | glipizide / metformin Oral Tablet              |
| RxNorm     | 374149      | tolazamide Oral Tablet                         |
| RxNorm     | 379559      | glyburide Oral Tablet [Euglucon]               |
| RxNorm     | 379565      | glyburide Oral Tablet [Diabetamide]            |
| RxNorm     | 379568      | glyburide Oral Tablet [Malix]                  |
| RxNorm     | 379570      | glyburide Oral Tablet [Calabren]               |
| RxNorm     | 379571      | Libanil                                        |
| RxNorm     | 379572      | glyburide Oral Tablet [Libanil]                |
| RxNorm     | 379802      | glipizide Oral Tablet [Minidiab]               |
| RxNorm     | 429841      | glyburide 5 MG / metformin 1000 MG Oral Tablet |
| RxNorm     | 430102      | glyburide 3.5 MG Oral Tablet                   |
| RxNorm     | 430103      | glyburide 1.75 MG Oral Tablet                  |
| RxNorm     | 430104      | glyburide 1 MG Oral Tablet                     |
| RxNorm     | 440285      | glyburide 1.75 MG                              |
| RxNorm     | 440286      | glyburide 1 MG                                 |
| RxNorm     | 440287      | glyburide 3.5 MG                               |

Continued on next page

**Table18 – continued from previous page**

| CodeSystem | ConceptCode | ConceptName                                       |
|------------|-------------|---------------------------------------------------|
| RxNorm     | 563154      | glyburide 5 MG [Daonil]                           |
| RxNorm     | 566056      | glipizide 5 MG [Glibenese]                        |
| RxNorm     | 566057      | glipizide 2.5 MG [Minidiab]                       |
| RxNorm     | 565327      | glimepiride 2 MG [Amaryl]                         |
| RxNorm     | 565408      | glimepiride 1 MG [Amaryl]                         |
| RxNorm     | 565409      | glimepiride 3 MG [Amaryl]                         |
| RxNorm     | 565410      | glimepiride 4 MG [Amaryl]                         |
| RxNorm     | 568684      | tolazamide 100 MG [Tolinase]                      |
| RxNorm     | 568685      | tolazamide 250 MG [Tolinase]                      |
| RxNorm     | 568686      | tolazamide 500 MG [Tolinase]                      |
| RxNorm     | 564036      | glyburide 2.5 MG [Calabren]                       |
| RxNorm     | 564037      | glyburide 5 MG [Calabren]                         |
| RxNorm     | 564038      | glipizide 5 MG [Minidiab]                         |
| RxNorm     | 566718      | glipizide 5 MG [Glucotrol]                        |
| RxNorm     | 566720      | glipizide 10 MG [Glucotrol]                       |
| RxNorm     | 566761      | glyburide 1.25 MG [Diabeta]                       |
| RxNorm     | 566762      | glyburide 1.25 MG [Micronase]                     |
| RxNorm     | 566764      | glyburide 2.5 MG [Diabeta]                        |
| RxNorm     | 566765      | glyburide 2.5 MG [Micronase]                      |
| RxNorm     | 566768      | glyburide 5 MG [Diabeta]                          |
| RxNorm     | 566769      | glyburide 5 MG [Micronase]                        |
| RxNorm     | 565667      | glyburide 2.5 MG [Libanil]                        |
| RxNorm     | 565668      | glyburide 2.5 MG [Semi-Daonil]                    |
| RxNorm     | 565669      | glyburide 2.5 MG [Euglucon]                       |
| RxNorm     | 565670      | glyburide 2.5 MG [Malix]                          |
| RxNorm     | 565671      | glyburide 2.5 MG [Diabetamide]                    |
| RxNorm     | 565672      | glyburide 5 MG [Libanil]                          |
| RxNorm     | 565673      | glyburide 5 MG [Euglucon]                         |
| RxNorm     | 565674      | glyburide 5 MG [Malix]                            |
| RxNorm     | 565675      | glyburide 5 MG [Diabetamide]                      |
| RxNorm     | 574612      | glyburide 3 MG [Glycron]                          |
| RxNorm     | 606253      | glimepiride / rosiglitazone                       |
| RxNorm     | 602543      | glimepiride / rosiglitazone Oral Tablet           |
| RxNorm     | 602544      | glimepiride 1 MG / rosiglitazone 4 MG Oral Tablet |
| RxNorm     | 602549      | glimepiride 2 MG / rosiglitazone 4 MG Oral Tablet |
| RxNorm     | 602550      | glimepiride 4 MG / rosiglitazone 4 MG Oral Tablet |
| RxNorm     | 607816      | Avandaryl                                         |
| RxNorm     | 574089      | glyburide 1.5 MG [Glycron]                        |
| RxNorm     | 574090      | glyburide 6 MG [Glycron]                          |
| RxNorm     | 574571      | glyburide 4.5 MG [Glycron]                        |
| RxNorm     | 669980      | Glyburase                                         |
| RxNorm     | 669981      | glyburide 1.25 MG [Glyburase]                     |
| RxNorm     | 669982      | glyburide Oral Tablet [Glyburase]                 |

Continued on next page

**Table18 – continued from previous page**

| CodeSystem | ConceptCode | ConceptName                                                 |
|------------|-------------|-------------------------------------------------------------|
| RxNorm     | 669983      | glyburide 1.25 MG Oral Tablet [Glyburase]                   |
| RxNorm     | 669984      | glyburide 2.5 MG [Glyburase]                                |
| RxNorm     | 669985      | glyburide 2.5 MG Oral Tablet [Glyburase]                    |
| RxNorm     | 669986      | glyburide 5 MG [Glyburase]                                  |
| RxNorm     | 669987      | glyburide 5 MG Oral Tablet [Glyburase]                      |
| RxNorm     | 647208      | Duetact                                                     |
| RxNorm     | 647235      | glimepiride / pioglitazone                                  |
| RxNorm     | 647236      | glimepiride / pioglitazone Oral Tablet                      |
| RxNorm     | 647237      | glimepiride 2 MG / pioglitazone 30 MG Oral Tablet           |
| RxNorm     | 647239      | glimepiride 4 MG / pioglitazone 30 MG Oral Tablet           |
| RxNorm     | 700835      | glipizide Extended Release Oral Tablet                      |
| RxNorm     | 706895      | glimepiride 2 MG / rosiglitazone 8 MG Oral Tablet           |
| RxNorm     | 706896      | glimepiride 4 MG / rosiglitazone 8 MG Oral Tablet           |
| RxNorm     | 731455      | glimepiride 4 MG / pioglitazone 30 MG [Duetact]             |
| RxNorm     | 731457      | glimepiride 4 MG / pioglitazone 30 MG Oral Tablet [Duetact] |
| RxNorm     | 731461      | glimepiride 2 MG / pioglitazone 30 MG [Duetact]             |
| RxNorm     | 731462      | glimepiride / pioglitazone Oral Tablet [Duetact]            |
| RxNorm     | 731463      | glimepiride 2 MG / pioglitazone 30 MG Oral Tablet [Duetact] |

#### 1.5.4 SGLT2 Inhibitors

Table 19: Concept codes used to identify SGLT2i medications.

| CodeSystem | ConceptCode | ConceptName                                 |
|------------|-------------|---------------------------------------------|
| RxNorm     | 1488564     | dapagliflozin                               |
| RxNorm     | 1545653     | empagliflozin                               |
| RxNorm     | 1546031     | canagliflozin anhydrous                     |
| RxNorm     | 1373458     | canagliflozin                               |
| RxNorm     | 1373459     | canagliflozin 100 MG                        |
| RxNorm     | 1373460     | canagliflozin Oral Product                  |
| RxNorm     | 1373461     | canagliflozin Pill                          |
| RxNorm     | 1373462     | canagliflozin Oral Tablet                   |
| RxNorm     | 1373463     | canagliflozin 100 MG Oral Tablet            |
| RxNorm     | 1373464     | Invokana                                    |
| RxNorm     | 1373465     | canagliflozin 100 MG [Invokana]             |
| RxNorm     | 1373466     | canagliflozin Oral Tablet [Invokana]        |
| RxNorm     | 1373467     | Invokana Oral Product                       |
| RxNorm     | 1373468     | Invokana Pill                               |
| RxNorm     | 1373469     | canagliflozin 100 MG Oral Tablet [Invokana] |

Continued on next page



**Table19 – continued from previous page**

| CodeSystem | ConceptCode | ConceptName                                                                    |
|------------|-------------|--------------------------------------------------------------------------------|
| RxNorm     | 1373470     | canagliflozin 300 MG                                                           |
| RxNorm     | 1373471     | canagliflozin 300 MG Oral Tablet                                               |
| RxNorm     | 1373472     | canagliflozin 300 MG [Invokana]                                                |
| RxNorm     | 1373473     | canagliflozin 300 MG Oral Tablet [Invokana]                                    |
| RxNorm     | 1486436     | dapagliflozin / metformin                                                      |
| RxNorm     | 1486972     | Farxiga                                                                        |
| RxNorm     | 1486975     | Farxiga Oral Product                                                           |
| RxNorm     | 1486976     | Farxiga Pill                                                                   |
| RxNorm     | 1486977     | dapagliflozin 10 MG Oral Tablet [Farxiga]                                      |
| RxNorm     | 1486981     | dapagliflozin 5 MG Oral Tablet [Farxiga]                                       |
| RxNorm     | 1488565     | dapagliflozin 10 MG                                                            |
| RxNorm     | 1488566     | dapagliflozin Oral Product                                                     |
| RxNorm     | 1488567     | dapagliflozin Pill                                                             |
| RxNorm     | 1488568     | dapagliflozin Oral Tablet                                                      |
| RxNorm     | 1488569     | dapagliflozin 10 MG Oral Tablet                                                |
| RxNorm     | 1488573     | dapagliflozin 5 MG                                                             |
| RxNorm     | 1488574     | dapagliflozin 5 MG Oral Tablet                                                 |
| RxNorm     | 1534343     | dapagliflozin Oral Tablet [Farxiga]                                            |
| RxNorm     | 1534344     | dapagliflozin 5 MG [Farxiga]                                                   |
| RxNorm     | 1534397     | dapagliflozin 10 MG [Farxiga]                                                  |
| RxNorm     | 1545145     | canagliflozin 150 MG                                                           |
| RxNorm     | 1545146     | canagliflozin / metformin Oral Product                                         |
| RxNorm     | 1545147     | canagliflozin / metformin Pill                                                 |
| RxNorm     | 1545148     | canagliflozin / metformin Oral Tablet                                          |
| RxNorm     | 1545149     | canagliflozin / metformin                                                      |
| RxNorm     | 1545150     | canagliflozin 150 MG / metformin hydrochloride 1000 MG Oral Tablet             |
| RxNorm     | 1545151     | Invokamet                                                                      |
| RxNorm     | 1545152     | canagliflozin 150 MG / metformin hydrochloride 1000 MG [Invokamet]             |
| RxNorm     | 1545153     | canagliflozin / metformin Oral Tablet [Invokamet]                              |
| RxNorm     | 1545154     | Invokamet Oral Product                                                         |
| RxNorm     | 1545155     | Invokamet Pill                                                                 |
| RxNorm     | 1545156     | canagliflozin 150 MG / metformin hydrochloride 1000 MG Oral Tablet [Invokamet] |
| RxNorm     | 1545157     | canagliflozin 150 MG / metformin hydrochloride 500 MG Oral Tablet              |
| RxNorm     | 1545158     | canagliflozin 150 MG / metformin hydrochloride 500 MG [Invokamet]              |
| RxNorm     | 1545159     | canagliflozin 150 MG / metformin hydrochloride 500 MG Oral Tablet [Invokamet]  |
| RxNorm     | 1545160     | canagliflozin 50 MG                                                            |

Continued on next page

**Table19 – continued from previous page**

| CodeSystem | ConceptCode | ConceptName                                                                              |
|------------|-------------|------------------------------------------------------------------------------------------|
| RxNorm     | 1545161     | canagliflozin 50 MG / metformin hydrochloride 1000 MG Oral Tablet                        |
| RxNorm     | 1545162     | canagliflozin 50 MG / metformin hydrochloride 1000 MG [Invokamet]                        |
| RxNorm     | 1545163     | canagliflozin 50 MG / metformin hydrochloride 1000 MG Oral Tablet [Invokamet]            |
| RxNorm     | 1545164     | canagliflozin 50 MG / metformin hydrochloride 500 MG Oral Tablet                         |
| RxNorm     | 1545165     | canagliflozin 50 MG / metformin hydrochloride 500 MG [Invokamet]                         |
| RxNorm     | 1545166     | canagliflozin 50 MG / metformin hydrochloride 500 MG Oral Tablet [Invokamet]             |
| RxNorm     | 1545654     | empagliflozin 10 MG                                                                      |
| RxNorm     | 1545655     | empagliflozin Oral Product                                                               |
| RxNorm     | 1545656     | empagliflozin Pill                                                                       |
| RxNorm     | 1545657     | empagliflozin Oral Tablet                                                                |
| RxNorm     | 1545658     | empagliflozin 10 MG Oral Tablet                                                          |
| RxNorm     | 1545659     | Jardiance                                                                                |
| RxNorm     | 1545660     | empagliflozin 10 MG [Jardiance]                                                          |
| RxNorm     | 1545661     | empagliflozin Oral Tablet [Jardiance]                                                    |
| RxNorm     | 1545662     | Jardiance Oral Product                                                                   |
| RxNorm     | 1545663     | Jardiance Pill                                                                           |
| RxNorm     | 1545664     | empagliflozin 10 MG Oral Tablet [Jardiance]                                              |
| RxNorm     | 1545665     | empagliflozin 25 MG                                                                      |
| RxNorm     | 1545666     | empagliflozin 25 MG Oral Tablet                                                          |
| RxNorm     | 1545667     | empagliflozin 25 MG [Jardiance]                                                          |
| RxNorm     | 1545668     | empagliflozin 25 MG Oral Tablet [Jardiance]                                              |
| RxNorm     | 1593057     | dapagliflozin / metformin Extended Release Oral Tablet                                   |
| RxNorm     | 1593058     | 24 HR dapagliflozin 10 MG / metformin hydrochloride 1000 MG Extended Release Oral Tablet |
| RxNorm     | 1593059     | dapagliflozin 10 MG / metformin hydrochloride 1000 MG Extended Release Oral Tablet       |
| RxNorm     | 1593068     | 24 HR dapagliflozin 10 MG / metformin hydrochloride 500 MG Extended Release Oral Tablet  |
| RxNorm     | 1593069     | dapagliflozin 10 MG / metformin hydrochloride 500 MG Extended Release Oral Tablet        |
| RxNorm     | 1593070     | 24 HR dapagliflozin 5 MG / metformin hydrochloride 1000 MG Extended Release Oral Tablet  |
| RxNorm     | 1593071     | dapagliflozin 5 MG / metformin hydrochloride 1000 MG Extended Release Oral Tablet        |
| RxNorm     | 1593072     | 24 HR dapagliflozin 5 MG / metformin hydrochloride 500 MG Extended Release Oral Tablet   |

Continued on next page

**Table19 – continued from previous page**

| CodeSystem | ConceptCode | ConceptName                                                                                       |
|------------|-------------|---------------------------------------------------------------------------------------------------|
| RxNorm     | 1593073     | dapagliflozin 5 MG / metformin hydrochloride 500 MG Extended Release Oral Tablet                  |
| RxNorm     | 1593774     | dapagliflozin / metformin Extended Release Oral Tablet [Xigduo]                                   |
| RxNorm     | 1593775     | 24 HR dapagliflozin 10 MG / metformin hydrochloride 1000 MG Extended Release Oral Tablet [Xigduo] |
| RxNorm     | 1593776     | dapagliflozin 10 MG / metformin hydrochloride 1000 MG Extended Release Oral Tablet [Xigduo]       |
| RxNorm     | 1593826     | dapagliflozin 10 MG / metformin hydrochloride 500 MG [Xigduo]                                     |
| RxNorm     | 1593827     | dapagliflozin 10 MG / metformin hydrochloride 500 MG Extended Release Oral Tablet [Xigduo]        |
| RxNorm     | 1593828     | dapagliflozin 5 MG / metformin hydrochloride 1000 MG [Xigduo]                                     |
| RxNorm     | 1593829     | dapagliflozin 5 MG / metformin hydrochloride 1000 MG Extended Release Oral Tablet [Xigduo]        |
| RxNorm     | 1593830     | dapagliflozin 5 MG / metformin hydrochloride 500 MG [Xigduo]                                      |
| RxNorm     | 1593831     | 24 HR dapagliflozin 5 MG / metformin hydrochloride 500 MG Extended Release Oral Tablet [Xigduo]   |
| RxNorm     | 1593832     | dapagliflozin 5 MG / metformin hydrochloride 500 MG Extended Release Oral Tablet [Xigduo]         |
| RxNorm     | 1593833     | 24 HR dapagliflozin 5 MG / metformin hydrochloride 1000 MG Extended Release Oral Tablet [Xigduo]  |
| RxNorm     | 1593835     | 24 HR dapagliflozin 10 MG / metformin hydrochloride 500 MG Extended Release Oral Tablet [Xigduo]  |
| RxNorm     | 1598392     | empagliflozin / linagliptin                                                                       |
| RxNorm     | 1602106     | empagliflozin / linagliptin Oral Product                                                          |
| RxNorm     | 1602107     | empagliflozin / linagliptin Pill                                                                  |
| RxNorm     | 1602108     | empagliflozin / linagliptin Oral Tablet                                                           |
| RxNorm     | 1602109     | empagliflozin 10 MG / linagliptin 5 MG Oral Tablet                                                |
| RxNorm     | 1602110     | Glyxambi                                                                                          |
| RxNorm     | 1602111     | empagliflozin 10 MG / linagliptin 5 MG [Glyxambi]                                                 |
| RxNorm     | 1602112     | empagliflozin / linagliptin Oral Tablet [Glyxambi]                                                |
| RxNorm     | 1602113     | Glyxambi Oral Product                                                                             |
| RxNorm     | 1602114     | Glyxambi Pill                                                                                     |
| RxNorm     | 1602115     | empagliflozin 10 MG / linagliptin 5 MG Oral Tablet [Glyxambi]                                     |
| RxNorm     | 1602118     | empagliflozin 25 MG / linagliptin 5 MG Oral Tablet                                                |
| RxNorm     | 1602119     | empagliflozin 25 MG / linagliptin 5 MG [Glyxambi]                                                 |
| RxNorm     | 1602120     | empagliflozin 25 MG / linagliptin 5 MG Oral Tablet [Glyxambi]                                     |
| RxNorm     | 1592709     | dapagliflozin / metformin Oral Product                                                            |

Continued on next page

**Table19 – continued from previous page**

| CodeSystem | ConceptCode | ConceptName                                                                       |
|------------|-------------|-----------------------------------------------------------------------------------|
| RxNorm     | 1592710     | dapagliflozin / metformin Pill                                                    |
| RxNorm     | 1592713     | Xigduo                                                                            |
| RxNorm     | 1592716     | Xigduo Oral Product                                                               |
| RxNorm     | 1592717     | Xigduo Pill                                                                       |
| RxNorm     | 1592722     | dapagliflozin 10 MG / metformin hydrochloride 1000 MG<br>[Xigduo]                 |
| RxNorm     | 1664310     | empagliflozin 5 MG                                                                |
| RxNorm     | 1664311     | empagliflozin / metformin Oral Product                                            |
| RxNorm     | 1664312     | empagliflozin / metformin Pill                                                    |
| RxNorm     | 1664313     | empagliflozin / metformin Oral Tablet                                             |
| RxNorm     | 1664314     | empagliflozin / metformin                                                         |
| RxNorm     | 1664315     | empagliflozin 5 MG / metformin hydrochloride 500 MG<br>Oral Tablet                |
| RxNorm     | 1664316     | Synjardy                                                                          |
| RxNorm     | 1664317     | empagliflozin 5 MG / metformin hydrochloride 500 MG<br>[Synjardy]                 |
| RxNorm     | 1664318     | empagliflozin / metformin Oral Tablet [Synjardy]                                  |
| RxNorm     | 1664319     | Synjardy Oral Product                                                             |
| RxNorm     | 1664320     | Synjardy Pill                                                                     |
| RxNorm     | 1664321     | empagliflozin 5 MG / metformin hydrochloride 500 MG<br>Oral Tablet [Synjardy]     |
| RxNorm     | 1664322     | empagliflozin 12.5 MG                                                             |
| RxNorm     | 1664323     | empagliflozin 12.5 MG / metformin hydrochloride 500 MG<br>Oral Tablet             |
| RxNorm     | 1664324     | empagliflozin 12.5 MG / metformin hydrochloride 500 MG<br>[Synjardy]              |
| RxNorm     | 1664325     | empagliflozin 12.5 MG / metformin hydrochloride 500 MG<br>Oral Tablet [Synjardy]  |
| RxNorm     | 1664326     | empagliflozin 5 MG / metformin hydrochloride 1000 MG<br>Oral Tablet               |
| RxNorm     | 1664327     | empagliflozin 5 MG / metformin hydrochloride 1000 MG<br>[Synjardy]                |
| RxNorm     | 1664328     | empagliflozin 5 MG / metformin hydrochloride 1000 MG<br>Oral Tablet [Synjardy]    |
| RxNorm     | 1665367     | empagliflozin 12.5 MG / metformin hydrochloride 1000 MG<br>Oral Tablet            |
| RxNorm     | 1665368     | empagliflozin 12.5 MG / metformin hydrochloride 1000 MG<br>[Synjardy]             |
| RxNorm     | 1665369     | empagliflozin 12.5 MG / metformin hydrochloride 1000 MG<br>Oral Tablet [Synjardy] |
| RxNorm     | 1727500     | dapagliflozin / saxagliptin                                                       |
| RxNorm     | 1810996     | canagliflozin / metformin Extended Release Oral Tablet                            |

Continued on next page

**Table19 – continued from previous page**

| CodeSystem | ConceptCode | ConceptName                                                                                           |
|------------|-------------|-------------------------------------------------------------------------------------------------------|
| RxNorm     | 1810997     | 24 HR canagliflozin 150 MG / metformin hydrochloride 1000 MG Extended Release Oral Tablet             |
| RxNorm     | 1810998     | canagliflozin / metformin Extended Release Oral Tablet [Invokamet]                                    |
| RxNorm     | 1810999     | 24 HR canagliflozin 150 MG / metformin hydrochloride 1000 MG Extended Release Oral Tablet [Invokamet] |
| RxNorm     | 1811000     | canagliflozin 150 MG / metformin hydrochloride 1000 MG Extended Release Oral Tablet                   |
| RxNorm     | 1811001     | canagliflozin 150 MG / metformin hydrochloride 1000 MG Extended Release Oral Tablet [Invokamet]       |
| RxNorm     | 1811002     | 24 HR canagliflozin 150 MG / metformin hydrochloride 500 MG Extended Release Oral Tablet              |
| RxNorm     | 1811003     | 24 HR canagliflozin 150 MG / metformin hydrochloride 500 MG Extended Release Oral Tablet [Invokamet]  |
| RxNorm     | 1811004     | canagliflozin 150 MG / metformin hydrochloride 500 MG Extended Release Oral Tablet                    |
| RxNorm     | 1811005     | canagliflozin 150 MG / metformin hydrochloride 500 MG Extended Release Oral Tablet [Invokamet]        |
| RxNorm     | 1811006     | 24 HR canagliflozin 50 MG / metformin hydrochloride 1000 MG Extended Release Oral Tablet              |
| RxNorm     | 1811007     | 24 HR canagliflozin 50 MG / metformin hydrochloride 1000 MG Extended Release Oral Tablet [Invokamet]  |
| RxNorm     | 1862684     | empagliflozin / metformin Extended Release Oral Tablet                                                |
| RxNorm     | 1862685     | 24 HR empagliflozin 10 MG / metformin hydrochloride 1000 MG Extended Release Oral Tablet              |
| RxNorm     | 1862686     | empagliflozin 10 MG / metformin hydrochloride 1000 MG [Synjardy]                                      |
| RxNorm     | 1862687     | empagliflozin / metformin Extended Release Oral Tablet [Synjardy]                                     |
| RxNorm     | 1862688     | 24 HR empagliflozin 10 MG / metformin hydrochloride 1000 MG Extended Release Oral Tablet [Synjardy]   |
| RxNorm     | 1862689     | empagliflozin 10 MG / metformin hydrochloride 1000 MG Extended Release Oral Tablet                    |
| RxNorm     | 1862690     | empagliflozin 10 MG / metformin hydrochloride 1000 MG Extended Release Oral Tablet [Synjardy]         |
| RxNorm     | 1862691     | 24 HR empagliflozin 12.5 MG / metformin hydrochloride 1000 MG Extended Release Oral Tablet            |
| RxNorm     | 1862692     | 24 HR empagliflozin 12.5 MG / metformin hydrochloride 1000 MG Extended Release Oral Tablet [Synjardy] |
| RxNorm     | 1862693     | empagliflozin 12.5 MG / metformin hydrochloride 1000 MG Extended Release Oral Tablet                  |
| RxNorm     | 1811008     | canagliflozin 50 MG / metformin hydrochloride 1000 MG Extended Release Oral Tablet                    |

Continued on next page

**Table19 – continued from previous page**

| CodeSystem | ConceptCode | ConceptName                                                                                         |
|------------|-------------|-----------------------------------------------------------------------------------------------------|
| RxNorm     | 1811009     | canagliflozin 50 MG / metformin hydrochloride 1000 MG Extended Release Oral Tablet [Invokamet]      |
| RxNorm     | 1811010     | 24 HR canagliflozin 50 MG / metformin hydrochloride 500 MG Extended Release Oral Tablet             |
| RxNorm     | 1811011     | 24 HR canagliflozin 50 MG / metformin hydrochloride 500 MG Extended Release Oral Tablet [Invokamet] |
| RxNorm     | 1811012     | canagliflozin 50 MG / metformin hydrochloride 500 MG Extended Release Oral Tablet                   |
| RxNorm     | 1811013     | canagliflozin 50 MG / metformin hydrochloride 500 MG Extended Release Oral Tablet [Invokamet]       |
| RxNorm     | 1862694     | empagliflozin 12.5 MG / metformin hydrochloride 1000 MG Extended Release Oral Tablet [Synjardy]     |
| RxNorm     | 1862695     | 24 HR empagliflozin 25 MG / metformin hydrochloride 1000 MG Extended Release Oral Tablet            |
| RxNorm     | 1862696     | empagliflozin 25 MG / metformin hydrochloride 1000 MG [Synjardy]                                    |
| RxNorm     | 1862697     | 24 HR empagliflozin 25 MG / metformin hydrochloride 1000 MG Extended Release Oral Tablet [Synjardy] |
| RxNorm     | 1862698     | empagliflozin 25 MG / metformin hydrochloride 1000 MG Extended Release Oral Tablet                  |
| RxNorm     | 1862699     | empagliflozin 25 MG / metformin hydrochloride 1000 MG Extended Release Oral Tablet [Synjardy]       |
| RxNorm     | 1862700     | 24 HR empagliflozin 5 MG / metformin hydrochloride 1000 MG Extended Release Oral Tablet             |
| RxNorm     | 1862701     | 24 HR empagliflozin 5 MG / metformin hydrochloride 1000 MG Extended Release Oral Tablet [Synjardy]  |
| RxNorm     | 1862702     | empagliflozin 5 MG / metformin hydrochloride 1000 MG Extended Release Oral Tablet                   |
| RxNorm     | 1862703     | empagliflozin 5 MG / metformin hydrochloride 1000 MG Extended Release Oral Tablet [Synjardy]        |
| RxNorm     | 1925495     | dapagliflozin / saxagliptin Oral Product                                                            |
| RxNorm     | 1925496     | dapagliflozin / saxagliptin Pill                                                                    |
| RxNorm     | 1925497     | dapagliflozin / saxagliptin Oral Tablet                                                             |
| RxNorm     | 1925498     | dapagliflozin 10 MG / saxagliptin 5 MG Oral Tablet                                                  |
| RxNorm     | 1925499     | Qtern                                                                                               |
| RxNorm     | 1925500     | dapagliflozin 10 MG / saxagliptin 5 MG [Qtern]                                                      |
| RxNorm     | 1925501     | dapagliflozin / saxagliptin Oral Tablet [Qtern]                                                     |
| RxNorm     | 1925502     | Qtern Oral Product                                                                                  |
| RxNorm     | 1925503     | Qtern Pill                                                                                          |
| RxNorm     | 1925504     | dapagliflozin 10 MG / saxagliptin 5 MG Oral Tablet [Qtern]                                          |
| RxNorm     | 1940495     | dapagliflozin 2.5 MG                                                                                |
| RxNorm     | 1940496     | 24 HR dapagliflozin 2.5 MG / metformin hydrochloride 1000 MG Extended Release Oral Tablet           |

Continued on next page

**Table19 – continued from previous page**

| CodeSystem | ConceptCode | ConceptName                                                                                                               |
|------------|-------------|---------------------------------------------------------------------------------------------------------------------------|
| RxNorm     | 1940497     | dapagliflozin 2.5 MG / metformin hydrochloride 1000 MG [Xigduo]                                                           |
| RxNorm     | 1940498     | 24 HR dapagliflozin 2.5 MG / metformin hydrochloride 1000 MG Extended Release Oral Tablet [Xigduo]                        |
| RxNorm     | 1940499     | dapagliflozin 2.5 MG / metformin hydrochloride 1000 MG Extended Release Oral Tablet                                       |
| RxNorm     | 1940500     | dapagliflozin 2.5 MG / metformin hydrochloride 1000 MG Extended Release Oral Tablet [Xigduo]                              |
| RxNorm     | 2117292     | dapagliflozin / metformin / saxagliptin                                                                                   |
| RxNorm     | 2169274     | dapagliflozin 5 MG / saxagliptin 5 MG Oral Tablet                                                                         |
| RxNorm     | 2169275     | dapagliflozin 5 MG / saxagliptin 5 MG [Qtern]                                                                             |
| RxNorm     | 2169276     | dapagliflozin 5 MG / saxagliptin 5 MG Oral Tablet [Qtern]                                                                 |
| RxNorm     | 2281864     | empagliflozin / linagliptin / metformin                                                                                   |
| RxNorm     | 2371722     | dapagliflozin / metformin / saxagliptin Oral Product                                                                      |
| RxNorm     | 2371723     | dapagliflozin / metformin / saxagliptin Pill                                                                              |
| RxNorm     | 2371724     | dapagliflozin / metformin / saxagliptin Extended Release Oral Tablet                                                      |
| RxNorm     | 2371725     | 24 HR dapagliflozin 10 MG / metformin hydrochloride 1000 MG / saxagliptin 5 MG Extended Release Oral Tablet               |
| RxNorm     | 2371726     | Qternmet                                                                                                                  |
| RxNorm     | 2371727     | dapagliflozin 10 MG / metformin hydrochloride 1000 MG / saxagliptin 5 MG [Qternmet]                                       |
| RxNorm     | 2371728     | dapagliflozin / metformin / saxagliptin Extended Release Oral Tablet [Qternmet]                                           |
| RxNorm     | 2371729     | Qternmet Oral Product                                                                                                     |
| RxNorm     | 2371730     | Qternmet Pill                                                                                                             |
| RxNorm     | 2371731     | 24 HR dapagliflozin 10 MG / metformin hydrochloride 1000 MG / saxagliptin 5 MG Extended Release Oral Tablet [Qternmet]    |
| RxNorm     | 2371732     | dapagliflozin 10 MG / metformin hydrochloride 1000 MG / saxagliptin 5 MG Extended Release Oral Tablet                     |
| RxNorm     | 2371733     | dapagliflozin 10 MG / metformin hydrochloride 1000 MG / saxagliptin 5 MG Extended Release Oral Tablet [Qternmet]          |
| RxNorm     | 2371734     | 24 HR dapagliflozin 2.5 MG / metformin hydrochloride 1000 MG / saxagliptin 2.5 MG Extended Release Oral Tablet            |
| RxNorm     | 2371735     | dapagliflozin 2.5 MG / metformin hydrochloride 1000 MG / saxagliptin 2.5 MG [Qternmet]                                    |
| RxNorm     | 2371736     | 24 HR dapagliflozin 2.5 MG / metformin hydrochloride 1000 MG / saxagliptin 2.5 MG Extended Release Oral Tablet [Qternmet] |
| RxNorm     | 2371737     | dapagliflozin 2.5 MG / metformin hydrochloride 1000 MG / saxagliptin 2.5 MG Extended Release Oral Tablet                  |

Continued on next page

**Table19 – continued from previous page**

| CodeSystem | ConceptCode | ConceptName                                                                                                             |
|------------|-------------|-------------------------------------------------------------------------------------------------------------------------|
| RxNorm     | 2371738     | dapagliflozin 2.5 MG / metformin hydrochloride 1000 MG / saxagliptin 2.5 MG Extended Release Oral Tablet [Qternmet]     |
| RxNorm     | 2371740     | 24 HR dapagliflozin 5 MG / metformin hydrochloride 1000 MG / saxagliptin 2.5 MG Extended Release Oral Tablet            |
| RxNorm     | 2371741     | dapagliflozin 5 MG / metformin hydrochloride 1000 MG / saxagliptin 2.5 MG [Qternmet]                                    |
| RxNorm     | 2371742     | 24 HR dapagliflozin 5 MG / metformin hydrochloride 1000 MG / saxagliptin 2.5 MG Extended Release Oral Tablet [Qternmet] |
| RxNorm     | 2371743     | dapagliflozin 5 MG / metformin hydrochloride 1000 MG / saxagliptin 2.5 MG Extended Release Oral Tablet                  |
| RxNorm     | 2371744     | dapagliflozin 5 MG / metformin hydrochloride 1000 MG / saxagliptin 2.5 MG Extended Release Oral Tablet [Qternmet]       |
| RxNorm     | 2371745     | 24 HR dapagliflozin 5 MG / metformin hydrochloride 1000 MG / saxagliptin 5 MG Extended Release Oral Tablet              |
| RxNorm     | 2371746     | dapagliflozin 5 MG / metformin hydrochloride 1000 MG / saxagliptin 5 MG [Qternmet]                                      |
| RxNorm     | 2371747     | 24 HR dapagliflozin 5 MG / metformin hydrochloride 1000 MG / saxagliptin 5 MG Extended Release Oral Tablet [Qternmet]   |
| RxNorm     | 2371748     | dapagliflozin 5 MG / metformin hydrochloride 1000 MG / saxagliptin 5 MG Extended Release Oral Tablet                    |
| RxNorm     | 2371749     | dapagliflozin 5 MG / metformin hydrochloride 1000 MG / saxagliptin 5 MG Extended Release Oral Tablet [Qternmet]         |
| RxNorm     | 2359276     | empagliflozin / linagliptin / metformin Oral Product                                                                    |
| RxNorm     | 2359277     | empagliflozin / linagliptin / metformin Pill                                                                            |
| RxNorm     | 2359278     | empagliflozin / linagliptin / metformin Extended Release Oral Tablet                                                    |
| RxNorm     | 2359279     | 24 HR empagliflozin 10 MG / linagliptin 5 MG / metformin hydrochloride 1000 MG Extended Release Oral Tablet             |
| RxNorm     | 2359280     | Trijardy                                                                                                                |
| RxNorm     | 2359281     | empagliflozin 10 MG / linagliptin 5 MG / metformin hydrochloride 1000 MG [Trijardy]                                     |
| RxNorm     | 2359282     | empagliflozin / linagliptin / metformin Extended Release Oral Tablet [Trijardy]                                         |
| RxNorm     | 2359283     | Trijardy Oral Product                                                                                                   |
| RxNorm     | 2359284     | Trijardy Pill                                                                                                           |
| RxNorm     | 2359285     | 24 HR empagliflozin 10 MG / linagliptin 5 MG / metformin hydrochloride 1000 MG Extended Release Oral Tablet [Trijardy]  |

Continued on next page



**Table19 – continued from previous page**

| CodeSystem | ConceptCode | ConceptName                                                                                                                |
|------------|-------------|----------------------------------------------------------------------------------------------------------------------------|
| RxNorm     | 2359286     | empagliflozin 10 MG / linagliptin 5 MG / metformin hydrochloride 1000 MG Extended Release Oral Tablet                      |
| RxNorm     | 2359287     | empagliflozin 10 MG / linagliptin 5 MG / metformin hydrochloride 1000 MG Extended Release Oral Tablet [Trijardy]           |
| RxNorm     | 2359288     | 24 HR empagliflozin 12.5 MG / linagliptin 2.5 MG / metformin hydrochloride 1000 MG Extended Release Oral Tablet            |
| RxNorm     | 2359289     | empagliflozin 12.5 MG / linagliptin 2.5 MG / metformin hydrochloride 1000 MG [Trijardy]                                    |
| RxNorm     | 2359290     | 24 HR empagliflozin 12.5 MG / linagliptin 2.5 MG / metformin hydrochloride 1000 MG Extended Release Oral Tablet [Trijardy] |
| RxNorm     | 2359291     | empagliflozin 12.5 MG / linagliptin 2.5 MG / metformin hydrochloride 1000 MG Extended Release Oral Tablet                  |
| RxNorm     | 2359292     | empagliflozin 12.5 MG / linagliptin 2.5 MG / metformin hydrochloride 1000 MG Extended Release Oral Tablet [Trijardy]       |
| RxNorm     | 2359351     | 24 HR empagliflozin 25 MG / linagliptin 5 MG / metformin hydrochloride 1000 MG Extended Release Oral Tablet                |
| RxNorm     | 2359352     | empagliflozin 25 MG / linagliptin 5 MG / metformin hydrochloride 1000 MG [Trijardy]                                        |
| RxNorm     | 2359353     | 24 HR empagliflozin 25 MG / linagliptin 5 MG / metformin hydrochloride 1000 MG Extended Release Oral Tablet [Trijardy]     |
| RxNorm     | 2359354     | empagliflozin 25 MG / linagliptin 5 MG / metformin hydrochloride 1000 MG Extended Release Oral Tablet                      |
| RxNorm     | 2359355     | empagliflozin 25 MG / linagliptin 5 MG / metformin hydrochloride 1000 MG Extended Release Oral Tablet [Trijardy]           |
| RxNorm     | 2359356     | 24 HR empagliflozin 5 MG / linagliptin 2.5 MG / metformin hydrochloride 1000 MG Extended Release Oral Tablet               |
| RxNorm     | 2359357     | empagliflozin 5 MG / linagliptin 2.5 MG / metformin hydrochloride 1000 MG [Trijardy]                                       |
| RxNorm     | 2359358     | 24 HR empagliflozin 5 MG / linagliptin 2.5 MG / metformin hydrochloride 1000 MG Extended Release Oral Tablet [Trijardy]    |
| RxNorm     | 2359359     | empagliflozin 5 MG / linagliptin 2.5 MG / metformin hydrochloride 1000 MG Extended Release Oral Tablet                     |
| RxNorm     | 2359360     | empagliflozin 5 MG / linagliptin 2.5 MG / metformin hydrochloride 1000 MG Extended Release Oral Tablet [Trijardy]          |

### 1.5.5 DPP-4

Table 20: Concept codes used to identify DPP-4 medications.

| CodeSystem | ConceptCode | ConceptName                                                                             |
|------------|-------------|-----------------------------------------------------------------------------------------|
| RxNorm     | 1100699     | linagliptin                                                                             |
| RxNorm     | 1368001     | alogliptin                                                                              |
| RxNorm     | 1546030     | saxagliptin anhydrous                                                                   |
| RxNorm     | 593411      | sitagliptin                                                                             |
| RxNorm     | 1243830     | Metformin / sitagliptin Extended Release Tablet [Janumet 100/1000]                      |
| RxNorm     | 1243847     | Metformin / sitagliptin Extended Release Tablet [Janumet 50/500]                        |
| RxNorm     | 1243023     | Linagliptin / Metformin Oral Tablet [Jentaduetto 2.5/1000]                              |
| RxNorm     | 1243030     | Linagliptin / Metformin Oral Tablet [Jentaduetto 2.5/500]                               |
| RxNorm     | 705136      | Metformin 1000 MG / sitagliptin 50 MG Oral Tablet [Janumet]                             |
| RxNorm     | 705134      | Metformin 1000 MG / sitagliptin 50 MG [Janumet]                                         |
| RxNorm     | 705135      | Metformin / sitagliptin Oral Tablet [Janumet]                                           |
| RxNorm     | 705138      | Metformin 500 MG / sitagliptin 50 MG Oral Tablet [Janumet]                              |
| RxNorm     | 748763      | Metformin 500 MG / sitagliptin 64.3 MG Oral Tablet                                      |
| RxNorm     | 757607      | Metformin / sitagliptin Oral Tablet [Janumet 50 mg/500 mg]                              |
| RxNorm     | 748762      | sitagliptin 64.3 MG                                                                     |
| RxNorm     | 748765      | Metformin 500 MG / sitagliptin 64.3 MG Oral Tablet [Janumet]                            |
| RxNorm     | 705137      | Metformin 500 MG / sitagliptin 50 MG [Janumet]                                          |
| RxNorm     | 748764      | Metformin 500 MG / sitagliptin 64.3 MG [Janumet]                                        |
| RxNorm     | 1043581     | Metformin / saxagliptin Extended Release Tablet [Kombiglyze 5/500]                      |
| RxNorm     | 1043573     | Metformin / saxagliptin Extended Release Tablet [Kombiglyze 5/1000]                     |
| RxNorm     | 1189807     | Simvastatin / sitagliptin Oral Tablet [Juvissync 100/10]                                |
| RxNorm     | 1189824     | Simvastatin / sitagliptin Oral Tablet [Juvissync 100/40]                                |
| RxNorm     | 1243031     | Jentaduetto 2.5/500 Oral Product                                                        |
| RxNorm     | 1243025     | Jentaduetto 2.5/1000 Pill                                                               |
| RxNorm     | 1043561     | metformin / saxagliptin Extended Release Oral Tablet                                    |
| RxNorm     | 1043562     | metformin / saxagliptin                                                                 |
| RxNorm     | 1043563     | 24 HR metformin hydrochloride 1000 MG / saxagliptin 2.5 MG Extended Release Oral Tablet |
| RxNorm     | 1043565     | metformin hydrochloride 1000 MG / saxagliptin 2.5 MG [Kombiglyze]                       |
| RxNorm     | 1043566     | metformin / saxagliptin Extended Release Oral Tablet [Kombiglyze]                       |

Continued on next page

**Table20 – continued from previous page**

| CodeSystem | ConceptCode | ConceptName                                                                                          |
|------------|-------------|------------------------------------------------------------------------------------------------------|
| RxNorm     | 1043567     | 24 HR metformin hydrochloride 1000 MG / saxagliptin 2.5 MG Extended Release Oral Tablet [Kombiglyze] |
| RxNorm     | 1043568     | metformin hydrochloride 1000 MG / saxagliptin 2.5 MG Extended Release Oral Tablet                    |
| RxNorm     | 1043569     | metformin hydrochloride 1000 MG / saxagliptin 2.5 MG Extended Release Oral Tablet [Kombiglyze]       |
| RxNorm     | 1043570     | 24 HR metformin hydrochloride 1000 MG / saxagliptin 5 MG Extended Release Oral Tablet                |
| RxNorm     | 1043572     | metformin hydrochloride 1000 MG / saxagliptin 5 MG [Kombiglyze]                                      |
| RxNorm     | 1043574     | 24 HR metformin hydrochloride 1000 MG / saxagliptin 5 MG Extended Release Oral Tablet [Kombiglyze]   |
| RxNorm     | 1043575     | metformin hydrochloride 1000 MG / saxagliptin 5 MG Extended Release Oral Tablet                      |
| RxNorm     | 1043576     | metformin hydrochloride 1000 MG / saxagliptin 5 MG Extended Release Oral Tablet [Kombiglyze]         |
| RxNorm     | 1043578     | 24 HR metformin hydrochloride 500 MG / saxagliptin 5 MG Extended Release Oral Tablet                 |
| RxNorm     | 1043580     | metformin hydrochloride 500 MG / saxagliptin 5 MG [Kombiglyze]                                       |
| RxNorm     | 1043582     | 24 HR metformin hydrochloride 500 MG / saxagliptin 5 MG Extended Release Oral Tablet [Kombiglyze]    |
| RxNorm     | 1043583     | metformin hydrochloride 500 MG / saxagliptin 5 MG Extended Release Oral Tablet                       |
| RxNorm     | 1043584     | metformin hydrochloride 500 MG / saxagliptin 5 MG Extended Release Oral Tablet [Kombiglyze]          |
| RxNorm     | 1100700     | linagliptin 5 MG                                                                                     |
| RxNorm     | 1100701     | linagliptin Oral Tablet                                                                              |
| RxNorm     | 1100702     | linagliptin 5 MG Oral Tablet                                                                         |
| RxNorm     | 1100703     | Tradjenta                                                                                            |
| RxNorm     | 1100704     | linagliptin 5 MG [Tradjenta]                                                                         |
| RxNorm     | 1100705     | linagliptin Oral Tablet [Tradjenta]                                                                  |
| RxNorm     | 1100706     | linagliptin 5 MG Oral Tablet [Tradjenta]                                                             |
| RxNorm     | 1158518     | saxagliptin Oral Product                                                                             |
| RxNorm     | 1158519     | saxagliptin Pill                                                                                     |
| RxNorm     | 1159662     | sitagliptin Oral Product                                                                             |
| RxNorm     | 1159663     | sitagliptin Pill                                                                                     |
| RxNorm     | 1161605     | metformin / saxagliptin Oral Product                                                                 |
| RxNorm     | 1161606     | metformin / saxagliptin Pill                                                                         |
| RxNorm     | 1161607     | metformin / sitagliptin Oral Product                                                                 |
| RxNorm     | 1161608     | metformin / sitagliptin Pill                                                                         |
| RxNorm     | 1164670     | linagliptin Oral Product                                                                             |
| RxNorm     | 1164671     | linagliptin Pill                                                                                     |

Continued on next page

**Table20 – continued from previous page**

| CodeSystem | ConceptCode | ConceptName                                                                   |
|------------|-------------|-------------------------------------------------------------------------------|
| RxNorm     | 1181729     | Onglyza Oral Product                                                          |
| RxNorm     | 1181730     | Onglyza Pill                                                                  |
| RxNorm     | 1172860     | Kombiglyze Pill                                                               |
| RxNorm     | 1172861     | Kombiglyze Oral Product                                                       |
| RxNorm     | 1167810     | Janumet Oral Product                                                          |
| RxNorm     | 1167811     | Janumet Pill                                                                  |
| RxNorm     | 1167814     | Januvia Oral Product                                                          |
| RxNorm     | 1167815     | Januvia Pill                                                                  |
| RxNorm     | 1179163     | Tradjenta Oral Product                                                        |
| RxNorm     | 1179164     | Tradjenta Pill                                                                |
| RxNorm     | 1189800     | simvastatin / sitagliptin Oral Product                                        |
| RxNorm     | 1189801     | simvastatin / sitagliptin Pill                                                |
| RxNorm     | 1189802     | simvastatin / sitagliptin Oral Tablet                                         |
| RxNorm     | 1189803     | simvastatin / sitagliptin                                                     |
| RxNorm     | 1189804     | simvastatin 10 MG / sitagliptin 100 MG Oral Tablet                            |
| RxNorm     | 1189806     | simvastatin 10 MG / sitagliptin 100 MG [Juvisync]                             |
| RxNorm     | 1189808     | simvastatin 20 MG / sitagliptin 100 MG Oral Tablet                            |
| RxNorm     | 1189810     | simvastatin 20 MG / sitagliptin 100 MG [Juvisync]                             |
| RxNorm     | 1189811     | simvastatin / sitagliptin Oral Tablet [Juvisync]                              |
| RxNorm     | 1189812     | Juvisync Oral Product                                                         |
| RxNorm     | 1189813     | Juvisync Pill                                                                 |
| RxNorm     | 1189814     | simvastatin 20 MG / sitagliptin 100 MG Oral Tablet [Juvisync]                 |
| RxNorm     | 1189818     | simvastatin 10 MG / sitagliptin 100 MG Oral Tablet [Juvisync]                 |
| RxNorm     | 1189821     | simvastatin 40 MG / sitagliptin 100 MG Oral Tablet                            |
| RxNorm     | 1189823     | simvastatin 40 MG / sitagliptin 100 MG [Juvisync]                             |
| RxNorm     | 1189827     | simvastatin 40 MG / sitagliptin 100 MG Oral Tablet [Juvisync]                 |
| RxNorm     | 1243015     | linagliptin 2.5 MG                                                            |
| RxNorm     | 1243016     | linagliptin / metformin Oral Product                                          |
| RxNorm     | 1243017     | linagliptin / metformin Pill                                                  |
| RxNorm     | 1243018     | linagliptin / metformin Oral Tablet                                           |
| RxNorm     | 1243019     | linagliptin / metformin                                                       |
| RxNorm     | 1243020     | linagliptin 2.5 MG / metformin hydrochloride 1000 MG Oral Tablet              |
| RxNorm     | 1243022     | linagliptin 2.5 MG / metformin hydrochloride 1000 MG [Jentadueto]             |
| RxNorm     | 1243026     | linagliptin 2.5 MG / metformin hydrochloride 1000 MG Oral Tablet [Jentadueto] |
| RxNorm     | 1243027     | linagliptin 2.5 MG / metformin hydrochloride 500 MG Oral Tablet               |

Continued on next page

**Table20 – continued from previous page**

| CodeSystem | ConceptCode | ConceptName                                                                                       |
|------------|-------------|---------------------------------------------------------------------------------------------------|
| RxNorm     | 1243029     | linagliptin 2.5 MG / metformin hydrochloride 500 MG [Jentadueto]                                  |
| RxNorm     | 1243033     | linagliptin 2.5 MG / metformin hydrochloride 500 MG Oral Tablet [Jentadueto]                      |
| RxNorm     | 1243034     | linagliptin 2.5 MG / metformin hydrochloride 850 MG Oral Tablet                                   |
| RxNorm     | 1243036     | linagliptin 2.5 MG / metformin hydrochloride 850 MG [Jentadueto]                                  |
| RxNorm     | 1243037     | linagliptin / metformin Oral Tablet [Jentadueto]                                                  |
| RxNorm     | 1243038     | Jentadueto Oral Product                                                                           |
| RxNorm     | 1243039     | Jentadueto Pill                                                                                   |
| RxNorm     | 1243040     | linagliptin 2.5 MG / metformin hydrochloride 850 MG Oral Tablet [Jentadueto]                      |
| RxNorm     | 1243826     | metformin / sitagliptin Extended Release Oral Tablet                                              |
| RxNorm     | 1243827     | 24 HR metformin hydrochloride 1000 MG / sitagliptin 100 MG Extended Release Oral Tablet           |
| RxNorm     | 1243829     | metformin hydrochloride 1000 MG / sitagliptin 100 MG [Janumet]                                    |
| RxNorm     | 1243833     | 24 HR metformin hydrochloride 1000 MG / sitagliptin 100 MG Extended Release Oral Tablet [Janumet] |
| RxNorm     | 1243834     | metformin hydrochloride 1000 MG / sitagliptin 100 MG Extended Release Oral Tablet                 |
| RxNorm     | 1243835     | metformin hydrochloride 1000 MG / sitagliptin 100 MG Extended Release Oral Tablet [Janumet]       |
| RxNorm     | 1243839     | metformin / sitagliptin Extended Release Oral Tablet [Janumet]                                    |
| RxNorm     | 1243842     | 24 HR metformin hydrochloride 1000 MG / sitagliptin 50 MG Extended Release Oral Tablet            |
| RxNorm     | 1243843     | 24 HR metformin hydrochloride 1000 MG / sitagliptin 50 MG Extended Release Oral Tablet [Janumet]  |
| RxNorm     | 1243844     | metformin hydrochloride 1000 MG / sitagliptin 50 MG Extended Release Oral Tablet                  |
| RxNorm     | 1243845     | metformin hydrochloride 1000 MG / sitagliptin 50 MG Extended Release Oral Tablet [Janumet]        |
| RxNorm     | 1243846     | 24 HR metformin hydrochloride 500 MG / sitagliptin 50 MG Extended Release Oral Tablet             |
| RxNorm     | 1243848     | 24 HR metformin hydrochloride 500 MG / sitagliptin 50 MG Extended Release Oral Tablet [Janumet]   |
| RxNorm     | 1243849     | metformin hydrochloride 500 MG / sitagliptin 50 MG Extended Release Oral Tablet                   |
| RxNorm     | 1243850     | metformin hydrochloride 500 MG / sitagliptin 50 MG Extended Release Oral Tablet [Janumet]         |
| RxNorm     | 1312409     | simvastatin 10 MG / sitagliptin 50 MG Oral Tablet                                                 |

Continued on next page

**Table20 – continued from previous page**

| CodeSystem | ConceptCode | ConceptName                                                               |
|------------|-------------|---------------------------------------------------------------------------|
| RxNorm     | 1312411     | simvastatin 10 MG / sitagliptin 50 MG [Juvisync]                          |
| RxNorm     | 1312415     | simvastatin 10 MG / sitagliptin 50 MG Oral Tablet [Juvisync]              |
| RxNorm     | 1312416     | simvastatin 20 MG / sitagliptin 50 MG Oral Tablet                         |
| RxNorm     | 1312418     | simvastatin 20 MG / sitagliptin 50 MG [Juvisync]                          |
| RxNorm     | 1312422     | simvastatin 20 MG / sitagliptin 50 MG Oral Tablet [Juvisync]              |
| RxNorm     | 1312423     | simvastatin 40 MG / sitagliptin 50 MG Oral Tablet                         |
| RxNorm     | 1312425     | simvastatin 40 MG / sitagliptin 50 MG [Juvisync]                          |
| RxNorm     | 1312429     | simvastatin 40 MG / sitagliptin 50 MG Oral Tablet [Juvisync]              |
| RxNorm     | 1368002     | alogliptin 25 MG                                                          |
| RxNorm     | 1368003     | alogliptin Oral Product                                                   |
| RxNorm     | 1368004     | alogliptin Pill                                                           |
| RxNorm     | 1368005     | alogliptin Oral Tablet                                                    |
| RxNorm     | 1368006     | alogliptin 25 MG Oral Tablet                                              |
| RxNorm     | 1368007     | Nesina                                                                    |
| RxNorm     | 1368008     | alogliptin 25 MG [Nesina]                                                 |
| RxNorm     | 1368009     | alogliptin Oral Tablet [Nesina]                                           |
| RxNorm     | 1368010     | Nesina Oral Product                                                       |
| RxNorm     | 1368011     | Nesina Pill                                                               |
| RxNorm     | 1368012     | alogliptin 25 MG Oral Tablet [Nesina]                                     |
| RxNorm     | 1368017     | alogliptin 6.25 MG                                                        |
| RxNorm     | 1368018     | alogliptin 6.25 MG Oral Tablet                                            |
| RxNorm     | 1368019     | alogliptin 6.25 MG [Nesina]                                               |
| RxNorm     | 1368020     | alogliptin 6.25 MG Oral Tablet [Nesina]                                   |
| RxNorm     | 1368033     | alogliptin 12.5 MG                                                        |
| RxNorm     | 1368034     | alogliptin 12.5 MG Oral Tablet                                            |
| RxNorm     | 1368035     | alogliptin 12.5 MG [Nesina]                                               |
| RxNorm     | 1368036     | alogliptin 12.5 MG Oral Tablet [Nesina]                                   |
| RxNorm     | 1368381     | alogliptin / metformin Oral Product                                       |
| RxNorm     | 1368382     | alogliptin / metformin Pill                                               |
| RxNorm     | 1368383     | alogliptin / metformin Oral Tablet                                        |
| RxNorm     | 1368384     | alogliptin / metformin                                                    |
| RxNorm     | 1368385     | alogliptin 12.5 MG / metformin hydrochloride 1000 MG Oral Tablet          |
| RxNorm     | 1368387     | alogliptin 12.5 MG / metformin hydrochloride 1000 MG [Kazano]             |
| RxNorm     | 1368391     | alogliptin 12.5 MG / metformin hydrochloride 1000 MG Oral Tablet [Kazano] |
| RxNorm     | 1368392     | alogliptin 12.5 MG / metformin hydrochloride 500 MG Oral Tablet           |

Continued on next page

**Table20 – continued from previous page**

| CodeSystem | ConceptCode | ConceptName                                                              |
|------------|-------------|--------------------------------------------------------------------------|
| RxNorm     | 1368394     | alogliptin 12.5 MG / metformin hydrochloride 500 MG [Kazano]             |
| RxNorm     | 1368395     | alogliptin / metformin Oral Tablet [Kazano]                              |
| RxNorm     | 1368396     | Kazano Oral Product                                                      |
| RxNorm     | 1368397     | Kazano Pill                                                              |
| RxNorm     | 1368398     | alogliptin 12.5 MG / metformin hydrochloride 500 MG Oral Tablet [Kazano] |
| RxNorm     | 1368399     | alogliptin / pioglitazone Oral Product                                   |
| RxNorm     | 1368400     | alogliptin / pioglitazone Pill                                           |
| RxNorm     | 1368401     | alogliptin / pioglitazone Oral Tablet                                    |
| RxNorm     | 1368402     | alogliptin / pioglitazone                                                |
| RxNorm     | 1368403     | alogliptin 12.5 MG / pioglitazone 15 MG Oral Tablet                      |
| RxNorm     | 1368405     | alogliptin 12.5 MG / pioglitazone 15 MG [Oseni]                          |
| RxNorm     | 1368409     | alogliptin 12.5 MG / pioglitazone 15 MG Oral Tablet [Oseni]              |
| RxNorm     | 1368410     | alogliptin 12.5 MG / pioglitazone 30 MG Oral Tablet                      |
| RxNorm     | 1368412     | alogliptin 12.5 MG / pioglitazone 30 MG [Oseni]                          |
| RxNorm     | 1368416     | alogliptin 12.5 MG / pioglitazone 30 MG Oral Tablet [Oseni]              |
| RxNorm     | 1368417     | alogliptin 12.5 MG / pioglitazone 45 MG Oral Tablet                      |
| RxNorm     | 1368419     | alogliptin 12.5 MG / pioglitazone 45 MG [Oseni]                          |
| RxNorm     | 1368423     | alogliptin 12.5 MG / pioglitazone 45 MG Oral Tablet [Oseni]              |
| RxNorm     | 1368424     | alogliptin 25 MG / pioglitazone 15 MG Oral Tablet                        |
| RxNorm     | 1368426     | alogliptin 25 MG / pioglitazone 15 MG [Oseni]                            |
| RxNorm     | 1368430     | alogliptin 25 MG / pioglitazone 15 MG Oral Tablet [Oseni]                |
| RxNorm     | 1368431     | alogliptin 25 MG / pioglitazone 30 MG Oral Tablet                        |
| RxNorm     | 1368433     | alogliptin 25 MG / pioglitazone 30 MG [Oseni]                            |
| RxNorm     | 1368434     | alogliptin / pioglitazone Oral Tablet [Oseni]                            |
| RxNorm     | 1368435     | Oseni Oral Product                                                       |
| RxNorm     | 1368436     | Oseni Pill                                                               |
| RxNorm     | 1368437     | alogliptin 25 MG / pioglitazone 30 MG Oral Tablet [Oseni]                |
| RxNorm     | 1368438     | alogliptin 25 MG / pioglitazone 45 MG Oral Tablet                        |
| RxNorm     | 1368440     | alogliptin 25 MG / pioglitazone 45 MG [Oseni]                            |
| RxNorm     | 1368444     | alogliptin 25 MG / pioglitazone 45 MG Oral Tablet [Oseni]                |
| RxNorm     | 1372692     | Kazano                                                                   |
| RxNorm     | 1372706     | Jentadueto                                                               |
| RxNorm     | 1372717     | Oseni                                                                    |
| RxNorm     | 1372730     | Kombiglyze                                                               |
| RxNorm     | 1372738     | Janumet                                                                  |
| RxNorm     | 1372754     | Juvisync                                                                 |
| RxNorm     | 1598392     | empagliflozin / linagliptin                                              |
| RxNorm     | 1602106     | empagliflozin / linagliptin Oral Product                                 |
| RxNorm     | 1602107     | empagliflozin / linagliptin Pill                                         |
| RxNorm     | 1602108     | empagliflozin / linagliptin Oral Tablet                                  |
| RxNorm     | 1602109     | empagliflozin 10 MG / linagliptin 5 MG Oral Tablet                       |

Continued on next page

**Table20 – continued from previous page**

| CodeSystem | ConceptCode | ConceptName                                                                                          |
|------------|-------------|------------------------------------------------------------------------------------------------------|
| RxNorm     | 1602110     | Glyxambi                                                                                             |
| RxNorm     | 1602111     | empagliflozin 10 MG / linagliptin 5 MG [Glyxambi]                                                    |
| RxNorm     | 1602112     | empagliflozin / linagliptin Oral Tablet [Glyxambi]                                                   |
| RxNorm     | 1602113     | Glyxambi Oral Product                                                                                |
| RxNorm     | 1602114     | Glyxambi Pill                                                                                        |
| RxNorm     | 1602115     | empagliflozin 10 MG / linagliptin 5 MG Oral Tablet [Glyxambi]                                        |
| RxNorm     | 1602118     | empagliflozin 25 MG / linagliptin 5 MG Oral Tablet                                                   |
| RxNorm     | 1602119     | empagliflozin 25 MG / linagliptin 5 MG [Glyxambi]                                                    |
| RxNorm     | 1602120     | empagliflozin 25 MG / linagliptin 5 MG Oral Tablet [Glyxambi]                                        |
| RxNorm     | 1727500     | dapagliflozin / saxagliptin                                                                          |
| RxNorm     | 1796088     | linagliptin / metformin Extended Release Oral Tablet                                                 |
| RxNorm     | 1796089     | 24 HR linagliptin 2.5 MG / metformin hydrochloride 1000 MG Extended Release Oral Tablet              |
| RxNorm     | 1796090     | linagliptin / metformin Extended Release Oral Tablet [Jentadueto]                                    |
| RxNorm     | 1796091     | 24 HR linagliptin 2.5 MG / metformin hydrochloride 1000 MG Extended Release Oral Tablet [Jentadueto] |
| RxNorm     | 1796092     | linagliptin 2.5 MG / metformin hydrochloride 1000 MG Extended Release Oral Tablet                    |
| RxNorm     | 1796093     | linagliptin 2.5 MG / metformin hydrochloride 1000 MG Extended Release Oral Tablet [Jentadueto]       |
| RxNorm     | 1796094     | 24 HR linagliptin 5 MG / metformin hydrochloride 1000 MG Extended Release Oral Tablet                |
| RxNorm     | 1796095     | linagliptin 5 MG / metformin hydrochloride 1000 MG [Jentadueto]                                      |
| RxNorm     | 1796096     | 24 HR linagliptin 5 MG / metformin hydrochloride 1000 MG Extended Release Oral Tablet [Jentadueto]   |
| RxNorm     | 1796097     | linagliptin 5 MG / metformin hydrochloride 1000 MG Extended Release Oral Tablet                      |
| RxNorm     | 1796098     | linagliptin 5 MG / metformin hydrochloride 1000 MG Extended Release Oral Tablet [Jentadueto]         |
| RxNorm     | 1925495     | dapagliflozin / saxagliptin Oral Product                                                             |
| RxNorm     | 1925496     | dapagliflozin / saxagliptin Pill                                                                     |
| RxNorm     | 1925497     | dapagliflozin / saxagliptin Oral Tablet                                                              |
| RxNorm     | 1925498     | dapagliflozin 10 MG / saxagliptin 5 MG Oral Tablet                                                   |
| RxNorm     | 1925499     | Qtern                                                                                                |
| RxNorm     | 1925500     | dapagliflozin 10 MG / saxagliptin 5 MG [Qtern]                                                       |
| RxNorm     | 1925501     | dapagliflozin / saxagliptin Oral Tablet [Qtern]                                                      |
| RxNorm     | 1925502     | Qtern Oral Product                                                                                   |
| RxNorm     | 1925503     | Qtern Pill                                                                                           |
| RxNorm     | 1925504     | dapagliflozin 10 MG / saxagliptin 5 MG Oral Tablet [Qtern]                                           |

Continued on next page



**Table20 – continued from previous page**

| CodeSystem | ConceptCode | ConceptName                                                               |
|------------|-------------|---------------------------------------------------------------------------|
| RxNorm     | 1992822     | ertugliflozin / sitagliptin Oral Product                                  |
| RxNorm     | 1992823     | ertugliflozin / sitagliptin Pill                                          |
| RxNorm     | 1992824     | ertugliflozin / sitagliptin Oral Tablet                                   |
| RxNorm     | 1992825     | ertugliflozin / sitagliptin                                               |
| RxNorm     | 1992826     | ertugliflozin 15 MG / sitagliptin 100 MG Oral Tablet                      |
| RxNorm     | 1992827     | Steglujan                                                                 |
| RxNorm     | 1992828     | ertugliflozin 15 MG / sitagliptin 100 MG [Steglujan]                      |
| RxNorm     | 1992829     | ertugliflozin / sitagliptin Oral Tablet [Steglujan]                       |
| RxNorm     | 1992830     | Steglujan Oral Product                                                    |
| RxNorm     | 1992831     | Steglujan Pill                                                            |
| RxNorm     | 1992832     | ertugliflozin 15 MG / sitagliptin 100 MG Oral Tablet [Steglujan]          |
| RxNorm     | 1992835     | ertugliflozin 5 MG / sitagliptin 100 MG Oral Tablet                       |
| RxNorm     | 1992836     | ertugliflozin 5 MG / sitagliptin 100 MG [Steglujan]                       |
| RxNorm     | 1992837     | ertugliflozin 5 MG / sitagliptin 100 MG Oral Tablet [Steglujan]           |
| RxNorm     | 2117292     | dapagliflozin / metformin / saxagliptin                                   |
| RxNorm     | 857974      | saxagliptin                                                               |
| RxNorm     | 858034      | saxagliptin 5 MG                                                          |
| RxNorm     | 858035      | saxagliptin Oral Tablet                                                   |
| RxNorm     | 858036      | saxagliptin 5 MG Oral Tablet                                              |
| RxNorm     | 858037      | Onglyza                                                                   |
| RxNorm     | 858038      | saxagliptin 5 MG [Onglyza]                                                |
| RxNorm     | 858039      | saxagliptin Oral Tablet [Onglyza]                                         |
| RxNorm     | 858040      | saxagliptin 5 MG Oral Tablet [Onglyza]                                    |
| RxNorm     | 858041      | saxagliptin 2.5 MG                                                        |
| RxNorm     | 858042      | saxagliptin 2.5 MG Oral Tablet                                            |
| RxNorm     | 858043      | saxagliptin 2.5 MG [Onglyza]                                              |
| RxNorm     | 858044      | saxagliptin 2.5 MG Oral Tablet [Onglyza]                                  |
| RxNorm     | 861769      | metformin hydrochloride 1000 MG / sitagliptin 50 MG Oral Tablet           |
| RxNorm     | 861770      | metformin hydrochloride 1000 MG / sitagliptin 50 MG [Janumet]             |
| RxNorm     | 861771      | metformin hydrochloride 1000 MG / sitagliptin 50 MG Oral Tablet [Janumet] |
| RxNorm     | 861819      | metformin hydrochloride 500 MG / sitagliptin 50 MG Oral Tablet            |
| RxNorm     | 861820      | metformin hydrochloride 500 MG / sitagliptin 50 MG [Janumet]              |
| RxNorm     | 861821      | metformin hydrochloride 500 MG / sitagliptin 50 MG Oral Tablet [Janumet]  |
| RxNorm     | 700518      | Metformin 1000 MG / sitagliptin 50 MG Oral Tablet                         |
| RxNorm     | 700517      | Metformin 500 MG / sitagliptin 50 MG Oral Tablet                          |

Continued on next page

**Table20 – continued from previous page**

| CodeSystem | ConceptCode | ConceptName                                                                                                            |
|------------|-------------|------------------------------------------------------------------------------------------------------------------------|
| RxNorm     | 757606      | Metformin 500 MG / sitagliptin 50 MG [Janumet 50 mg/500 mg]                                                            |
| RxNorm     | 757602      | Metformin 1000 MG / sitagliptin 50 MG [Janumet 50 mg/1000 mg]                                                          |
| RxNorm     | 757608      | Metformin 500 MG / sitagliptin 50 MG Oral Tablet [Janumet 50 mg/500 mg]                                                |
| RxNorm     | 757604      | Metformin 1000 MG / sitagliptin 50 MG Oral Tablet [Janumet 50 mg/1000 mg]                                              |
| RxNorm     | 1173547     | Kombiglyze 5/500 Oral Product                                                                                          |
| RxNorm     | 1189825     | Juvisync 100/40 Oral Product                                                                                           |
| RxNorm     | 1172859     | Kombiglyze 2.5/1000 Oral Product                                                                                       |
| RxNorm     | 1173546     | Kombiglyze 5/1000 Pill                                                                                                 |
| RxNorm     | 1243832     | Janumet 100/1000 Pill                                                                                                  |
| RxNorm     | 1189816     | Juvisync 100/10 Oral Product                                                                                           |
| RxNorm     | 1189826     | Juvisync 100/40 Pill                                                                                                   |
| RxNorm     | 1189817     | Juvisync 100/10 Pill                                                                                                   |
| RxNorm     | 1167812     | Janumet 50/500 Oral Product                                                                                            |
| RxNorm     | 1243032     | Jentadueto 2.5/500 Pill                                                                                                |
| RxNorm     | 1173548     | Kombiglyze 5/500 Pill                                                                                                  |
| RxNorm     | 1167813     | Janumet 50/500 Pill                                                                                                    |
| RxNorm     | 1243024     | Jentadueto 2.5/1000 Oral Product                                                                                       |
| RxNorm     | 1243831     | Janumet 100/1000 Oral Product                                                                                          |
| RxNorm     | 2169274     | dapagliflozin 5 MG / saxagliptin 5 MG Oral Tablet                                                                      |
| RxNorm     | 2169275     | dapagliflozin 5 MG / saxagliptin 5 MG [Qtern]                                                                          |
| RxNorm     | 2169276     | dapagliflozin 5 MG / saxagliptin 5 MG Oral Tablet [Qtern]                                                              |
| RxNorm     | 2281864     | empagliflozin / linagliptin / metformin                                                                                |
| RxNorm     | 2371722     | dapagliflozin / metformin / saxagliptin Oral Product                                                                   |
| RxNorm     | 2371723     | dapagliflozin / metformin / saxagliptin Pill                                                                           |
| RxNorm     | 2371724     | dapagliflozin / metformin / saxagliptin Extended Release Oral Tablet                                                   |
| RxNorm     | 2371725     | 24 HR dapagliflozin 10 MG / metformin hydrochloride 1000 MG / saxagliptin 5 MG Extended Release Oral Tablet            |
| RxNorm     | 2371726     | Qternmet                                                                                                               |
| RxNorm     | 2371727     | dapagliflozin 10 MG / metformin hydrochloride 1000 MG / saxagliptin 5 MG [Qternmet]                                    |
| RxNorm     | 2371728     | dapagliflozin / metformin / saxagliptin Extended Release Oral Tablet [Qternmet]                                        |
| RxNorm     | 2371729     | Qternmet Oral Product                                                                                                  |
| RxNorm     | 2371730     | Qternmet Pill                                                                                                          |
| RxNorm     | 2371731     | 24 HR dapagliflozin 10 MG / metformin hydrochloride 1000 MG / saxagliptin 5 MG Extended Release Oral Tablet [Qternmet] |

Continued on next page

**Table20 – continued from previous page**

| CodeSystem | ConceptCode | ConceptName                                                                                                               |
|------------|-------------|---------------------------------------------------------------------------------------------------------------------------|
| RxNorm     | 2371732     | dapagliflozin 10 MG / metformin hydrochloride 1000 MG / saxagliptin 5 MG Extended Release Oral Tablet                     |
| RxNorm     | 2371733     | dapagliflozin 10 MG / metformin hydrochloride 1000 MG / saxagliptin 5 MG Extended Release Oral Tablet [Qternmet]          |
| RxNorm     | 2371734     | 24 HR dapagliflozin 2.5 MG / metformin hydrochloride 1000 MG / saxagliptin 2.5 MG Extended Release Oral Tablet            |
| RxNorm     | 2371735     | dapagliflozin 2.5 MG / metformin hydrochloride 1000 MG / saxagliptin 2.5 MG [Qternmet]                                    |
| RxNorm     | 2371736     | 24 HR dapagliflozin 2.5 MG / metformin hydrochloride 1000 MG / saxagliptin 2.5 MG Extended Release Oral Tablet [Qternmet] |
| RxNorm     | 2371737     | dapagliflozin 2.5 MG / metformin hydrochloride 1000 MG / saxagliptin 2.5 MG Extended Release Oral Tablet                  |
| RxNorm     | 2371738     | dapagliflozin 2.5 MG / metformin hydrochloride 1000 MG / saxagliptin 2.5 MG Extended Release Oral Tablet [Qternmet]       |
| RxNorm     | 2371740     | 24 HR dapagliflozin 5 MG / metformin hydrochloride 1000 MG / saxagliptin 2.5 MG Extended Release Oral Tablet              |
| RxNorm     | 2371741     | dapagliflozin 5 MG / metformin hydrochloride 1000 MG / saxagliptin 2.5 MG [Qternmet]                                      |
| RxNorm     | 2371742     | 24 HR dapagliflozin 5 MG / metformin hydrochloride 1000 MG / saxagliptin 2.5 MG Extended Release Oral Tablet [Qternmet]   |
| RxNorm     | 2371743     | dapagliflozin 5 MG / metformin hydrochloride 1000 MG / saxagliptin 2.5 MG Extended Release Oral Tablet                    |
| RxNorm     | 2371744     | dapagliflozin 5 MG / metformin hydrochloride 1000 MG / saxagliptin 2.5 MG Extended Release Oral Tablet [Qternmet]         |
| RxNorm     | 2371745     | 24 HR dapagliflozin 5 MG / metformin hydrochloride 1000 MG / saxagliptin 5 MG Extended Release Oral Tablet                |
| RxNorm     | 2371746     | dapagliflozin 5 MG / metformin hydrochloride 1000 MG / saxagliptin 5 MG [Qternmet]                                        |
| RxNorm     | 2371747     | 24 HR dapagliflozin 5 MG / metformin hydrochloride 1000 MG / saxagliptin 5 MG Extended Release Oral Tablet [Qternmet]     |
| RxNorm     | 2371748     | dapagliflozin 5 MG / metformin hydrochloride 1000 MG / saxagliptin 5 MG Extended Release Oral Tablet                      |
| RxNorm     | 2371749     | dapagliflozin 5 MG / metformin hydrochloride 1000 MG / saxagliptin 5 MG Extended Release Oral Tablet [Qternmet]           |
| RxNorm     | 2359276     | empagliflozin / linagliptin / metformin Oral Product                                                                      |
| RxNorm     | 2359277     | empagliflozin / linagliptin / metformin Pill                                                                              |
| RxNorm     | 2359278     | empagliflozin / linagliptin / metformin Extended Release Oral Tablet                                                      |

Continued on next page

**Table20 – continued from previous page**

| CodeSystem | ConceptCode | ConceptName                                                                                                                |
|------------|-------------|----------------------------------------------------------------------------------------------------------------------------|
| RxNorm     | 2359279     | 24 HR empagliflozin 10 MG / linagliptin 5 MG / metformin hydrochloride 1000 MG Extended Release Oral Tablet                |
| RxNorm     | 2359280     | Trijardy                                                                                                                   |
| RxNorm     | 2359281     | empagliflozin 10 MG / linagliptin 5 MG / metformin hydrochloride 1000 MG [Trijardy]                                        |
| RxNorm     | 2359282     | empagliflozin / linagliptin / metformin Extended Release Oral Tablet [Trijardy]                                            |
| RxNorm     | 2359283     | Trijardy Oral Product                                                                                                      |
| RxNorm     | 2359284     | Trijardy Pill                                                                                                              |
| RxNorm     | 2359285     | 24 HR empagliflozin 10 MG / linagliptin 5 MG / metformin hydrochloride 1000 MG Extended Release Oral Tablet [Trijardy]     |
| RxNorm     | 2359286     | empagliflozin 10 MG / linagliptin 5 MG / metformin hydrochloride 1000 MG Extended Release Oral Tablet                      |
| RxNorm     | 2359287     | empagliflozin 10 MG / linagliptin 5 MG / metformin hydrochloride 1000 MG Extended Release Oral Tablet [Trijardy]           |
| RxNorm     | 2359288     | 24 HR empagliflozin 12.5 MG / linagliptin 2.5 MG / metformin hydrochloride 1000 MG Extended Release Oral Tablet            |
| RxNorm     | 2359289     | empagliflozin 12.5 MG / linagliptin 2.5 MG / metformin hydrochloride 1000 MG [Trijardy]                                    |
| RxNorm     | 2359290     | 24 HR empagliflozin 12.5 MG / linagliptin 2.5 MG / metformin hydrochloride 1000 MG Extended Release Oral Tablet [Trijardy] |
| RxNorm     | 2359291     | empagliflozin 12.5 MG / linagliptin 2.5 MG / metformin hydrochloride 1000 MG Extended Release Oral Tablet                  |
| RxNorm     | 2359292     | empagliflozin 12.5 MG / linagliptin 2.5 MG / metformin hydrochloride 1000 MG Extended Release Oral Tablet [Trijardy]       |
| RxNorm     | 2359351     | 24 HR empagliflozin 25 MG / linagliptin 5 MG / metformin hydrochloride 1000 MG Extended Release Oral Tablet                |
| RxNorm     | 2359352     | empagliflozin 25 MG / linagliptin 5 MG / metformin hydrochloride 1000 MG [Trijardy]                                        |
| RxNorm     | 2359353     | 24 HR empagliflozin 25 MG / linagliptin 5 MG / metformin hydrochloride 1000 MG Extended Release Oral Tablet [Trijardy]     |
| RxNorm     | 2359354     | empagliflozin 25 MG / linagliptin 5 MG / metformin hydrochloride 1000 MG Extended Release Oral Tablet                      |
| RxNorm     | 2359355     | empagliflozin 25 MG / linagliptin 5 MG / metformin hydrochloride 1000 MG Extended Release Oral Tablet [Trijardy]           |

Continued on next page

**Table20 – continued from previous page**

| CodeSystem | ConceptCode | ConceptName                                                                                                             |
|------------|-------------|-------------------------------------------------------------------------------------------------------------------------|
| RxNorm     | 2359356     | 24 HR empagliflozin 5 MG / linagliptin 2.5 MG / metformin hydrochloride 1000 MG Extended Release Oral Tablet            |
| RxNorm     | 2359357     | empagliflozin 5 MG / linagliptin 2.5 MG / metformin hydrochloride 1000 MG [Trijardy]                                    |
| RxNorm     | 2359358     | 24 HR empagliflozin 5 MG / linagliptin 2.5 MG / metformin hydrochloride 1000 MG Extended Release Oral Tablet [Trijardy] |
| RxNorm     | 2359359     | empagliflozin 5 MG / linagliptin 2.5 MG / metformin hydrochloride 1000 MG Extended Release Oral Tablet                  |
| RxNorm     | 2359360     | empagliflozin 5 MG / linagliptin 2.5 MG / metformin hydrochloride 1000 MG Extended Release Oral Tablet [Trijardy]       |
| RxNorm     | 665031      | sitagliptin 100 MG                                                                                                      |
| RxNorm     | 665032      | sitagliptin Oral Tablet                                                                                                 |
| RxNorm     | 665033      | sitagliptin 100 MG Oral Tablet                                                                                          |
| RxNorm     | 665034      | sitagliptin 100 MG [Januvia]                                                                                            |
| RxNorm     | 665035      | sitagliptin Oral Tablet [Januvia]                                                                                       |
| RxNorm     | 665036      | sitagliptin 100 MG Oral Tablet [Januvia]                                                                                |
| RxNorm     | 665037      | sitagliptin 25 MG                                                                                                       |
| RxNorm     | 665038      | sitagliptin 25 MG Oral Tablet                                                                                           |
| RxNorm     | 665039      | sitagliptin 25 MG [Januvia]                                                                                             |
| RxNorm     | 665040      | sitagliptin 25 MG Oral Tablet [Januvia]                                                                                 |
| RxNorm     | 665041      | sitagliptin 50 MG                                                                                                       |
| RxNorm     | 665042      | sitagliptin 50 MG Oral Tablet                                                                                           |
| RxNorm     | 665043      | sitagliptin 50 MG [Januvia]                                                                                             |
| RxNorm     | 665044      | sitagliptin 50 MG Oral Tablet [Januvia]                                                                                 |
| RxNorm     | 638596      | Januvia                                                                                                                 |
| RxNorm     | 700516      | metformin / sitagliptin Oral Tablet                                                                                     |
| RxNorm     | 729717      | metformin / sitagliptin                                                                                                 |
| RxNorm     | 757603      | metformin / sitagliptin Oral Tablet [Janumet]                                                                           |

## 1.6 Anti-Obesity Medications (AOMS)

### 1.6.1 Orlistat

Table 21: Concept codes used to identify orlistat medications.

| CodeSystem | ConceptCode | ConceptName           |
|------------|-------------|-----------------------|
| RxNorm     | 1159582     | orlistat Oral Product |
| RxNorm     | 1159583     | orlistat Pill         |
| RxNorm     | 1168454     | Alli Oral Product     |
| RxNorm     | 1168455     | Alli Pill             |

Continued on next page

**Table21 – continued from previous page**

| CodeSystem | ConceptCode | ConceptName                                   |
|------------|-------------|-----------------------------------------------|
| RxNorm     | 1186415     | Xenical Oral Product                          |
| RxNorm     | 1186416     | Xenical Pill                                  |
| RxNorm     | 226917      | orlistat 120 MG Oral Capsule [Xenical]        |
| RxNorm     | 226918      | Xenical                                       |
| RxNorm     | 314153      | orlistat 120 MG Oral Capsule                  |
| RxNorm     | 330389      | orlistat 120 MG                               |
| RxNorm     | 366436      | orlistat Oral Capsule [Xenical]               |
| RxNorm     | 373151      | orlistat Oral Capsule                         |
| RxNorm     | 37925       | orlistat                                      |
| RxNorm     | 574045      | orlistat 120 MG [Xenical]                     |
| RxNorm     | 692875      | orlistat 60 MG                                |
| RxNorm     | 692876      | orlistat 60 MG Oral Capsule                   |
| RxNorm     | 708361      | Alli                                          |
| RxNorm     | 723844      | orlistat 60 MG [Alli]                         |
| RxNorm     | 723845      | orlistat Oral Capsule [Alli]                  |
| RxNorm     | 723846      | orlistat 60 MG Oral Capsule [Alli]            |
| SNOMED CT  | 768105006   | Orlistat-containing product in oral dose form |
| SNOMED CT  | 777002008   | Orlistat only product                         |
| SNOMED CT  | 780075002   | Orlistat only product in oral dose form       |
| SNOMED CT  | 317893003   | Orlistat 120mg capsule                        |
| SNOMED CT  | 426638000   | Orlistat 60mg capsule                         |
| SNOMED CT  | 387007000   | Orlistat                                      |
| SNOMED CT  | 116093009   | Orlistat-containing product                   |

### 1.6.2 Phentermine Topiramate

Table 22: Concept codes used to identify phentermine topiramate medications.

| CodeSystem | ConceptCode | ConceptName                                                                 |
|------------|-------------|-----------------------------------------------------------------------------|
| RxNorm     | 1302868     | Phentermine 11.25 MG / topiramate 69 MG Extended Release Capsule            |
| RxNorm     | 1302827     | 24 HR phentermine 7.5 MG / topiramate 46 MG Extended Release Oral Capsule   |
| RxNorm     | 1302839     | 24 HR phentermine 3.75 MG / topiramate 23 MG Extended Release Oral Capsule  |
| RxNorm     | 1302850     | 24 HR phentermine 15 MG / topiramate 92 MG Extended Release Oral Capsule    |
| RxNorm     | 1313059     | 24 HR phentermine 11.25 MG / topiramate 69 MG Extended Release Oral Capsule |

Continued on next page

**Table22 – continued from previous page**

| CodeSystem | ConceptCode | ConceptName                                                                          |
|------------|-------------|--------------------------------------------------------------------------------------|
| RxNorm     | 1302833     | 24 HR phentermine 7.5 MG / topiramate 46 MG Extended Release Oral Capsule [Qsymia]   |
| RxNorm     | 1302845     | 24 HR phentermine 3.75 MG / topiramate 23 MG Extended Release Oral Capsule [Qsymia]  |
| RxNorm     | 1302856     | 24 HR phentermine 15 MG / topiramate 92 MG Extended Release Oral Capsule [Qsymia]    |
| RxNorm     | 1313061     | 24 HR phentermine 11.25 MG / topiramate 69 MG Extended Release Oral Capsule [Qsymia] |

## 1.7 Adverse Events

### 1.7.1 Bowel Obstruction

Table 23: Concept codes used to identify bowel obstruction adverse events.

| CodeSystem | ConceptCode       | ConceptName                                                                                           |
|------------|-------------------|-------------------------------------------------------------------------------------------------------|
| SNOMED CT  | 197044000         | Intestinal obstruction without mention of hernia                                                      |
| SNOMED CT  | 197067003         | (Intestinal adhesions with obstruction) or (other intestinal obstruction)                             |
| SNOMED CT  | 197071000         | Other intestinal obstruction NOS                                                                      |
| SNOMED CT  | 197072007         | Intestinal obstruction NOS                                                                            |
| SNOMED CT  | 197078006         | Acute intestinal obstruction                                                                          |
| SNOMED CT  | 197079003         | Subacute intestinal obstruction                                                                       |
| SNOMED CT  | 197080000         | Obstruction NOS: [intestinal] or [colonic] or [large bowel] or [small bowel] or [subacute intestinal] |
| SNOMED CT  | 197541001         | [X]Other and unspecified intestinal obstruction                                                       |
| SNOMED CT  | 213232001         | Intestinal obstruction as a complication of care NOS                                                  |
| SNOMED CT  | 233662009         | Distal intestinal obstruction syndrome                                                                |
| SNOMED CT  | 235801003         | Subacute intestinal obstruction NOS                                                                   |
| SNOMED CT  | 235802005         | Small bowel obstruction NOS                                                                           |
| SNOMED CT  | 235803000         | Large bowel obstruction NOS                                                                           |
| SNOMED CT  | 235805007         | Extrinsic intestinal obstruction                                                                      |
| SNOMED CT  | 155777003         | (Intestinal obstruction NOS) or (intestinal stricture)                                                |
| SNOMED CT  | 16834011000119109 | Partial obstruction of intestine                                                                      |
| SNOMED CT  | 16834071000119101 | Complete obstruction of lumen of small intestine                                                      |
| SNOMED CT  | 46420000          | Intestinal luminal obstruction                                                                        |
| SNOMED CT  | 81060008          | IO - Intestinal obstruction                                                                           |
| SNOMED CT  | 429196001         | Partial obstruction of small bowel                                                                    |
| SNOMED CT  | 710572000         | Intestinal obstruction co-occurrent and due to decreased peristalsis                                  |
| SNOMED CT  | 266456007         | Other intestinal obstruction                                                                          |

Continued on next page

**Table23 – continued from previous page**

| CodeSystem | ConceptCode | ConceptName                                                                               |
|------------|-------------|-------------------------------------------------------------------------------------------|
| SNOMED CT  | 266523009   | (Intestinal obstruction NOS) or (intestinal stricture)                                    |
| SNOMED CT  | 278526005   | Intestinal luminal obstruction                                                            |
| SNOMED CT  | 281254000   | Large bowel obstruction                                                                   |
| SNOMED CT  | 281255004   | Small bowel obstruction                                                                   |
| SNOMED CT  | 67745001    | Recurrent intestinal obstruction                                                          |
| SNOMED CT  | 77437008    | Intestinal obstruction due to a procedure                                                 |
| SNOMED CT  | 91580003    | Mural thickening of intestine causing obstruction                                         |
| SNOMED CT  | 92825002    | Closed-loop obstruction of intestinal tract                                               |
| SNOMED CT  | 1542009     | Omphalocele with obstruction                                                              |
| SNOMED CT  | 4397001     | Partial congenital duodenal obstruction                                                   |
| SNOMED CT  | 4410001     | Retroperitoneal hernia with obstruction                                                   |
| SNOMED CT  | 4998000     | Acute obstructive appendicitis                                                            |
| SNOMED CT  | 6441003     | Volvulus of colon                                                                         |
| SNOMED CT  | 9359003     | Obstructed bilateral inguinal hernia with gangrene                                        |
| SNOMED CT  | 9707006     | Intestinal volvulus                                                                       |
| SNOMED CT  | 9822005     | Umbilical hernia with gangrene AND obstruction                                            |
| SNOMED CT  | 10389003    | Acute gastrojejunal ulcer without hemorrhage AND without perforation but with obstruction |
| SNOMED CT  | 10897002    | Chronic gastrojejunal ulcer with perforation AND with obstruction                         |
| SNOMED CT  | 11552008    | Complete congenital duodenal obstruction                                                  |
| SNOMED CT  | 12355008    | Duodenal ulcer with hemorrhage, with perforation AND with obstruction                     |
| SNOMED CT  | 13466009    | Dynamic ileus                                                                             |
| SNOMED CT  | 13916005    | Bilateral recurrent femoral hernia with gangrene AND obstruction                          |
| SNOMED CT  | 15270002    | Obturation obstruction of intestine                                                       |
| SNOMED CT  | 18169007    | Duodenal ulcer without hemorrhage AND without perforation but with obstruction            |
| SNOMED CT  | 18269002    | Congenital duodenal obstruction                                                           |
| SNOMED CT  | 18367003    | Duodenal ulcer with hemorrhage AND obstruction                                            |
| SNOMED CT  | 21759003    | Gastrojejunal ulcer with perforation AND obstruction                                      |
| SNOMED CT  | 24001002    | Chronic gastrojejunal ulcer with hemorrhage, with perforation and with obstruction        |
| SNOMED CT  | 25617003    | Congenital duodenal obstruction due to malrotation of intestine                           |
| SNOMED CT  | 26315009    | Congenital obstruction of small intestine                                                 |
| SNOMED CT  | 28082003    | Chronic duodenal ulcer without hemorrhage AND without perforation but with obstruction    |
| SNOMED CT  | 28358004    | Acute obstructive appendicitis with perforation AND peritonitis                           |
| SNOMED CT  | 30074005    | Strangulation obstruction of intestine                                                    |
| SNOMED CT  | 30300009    | Obstructed incisional hernia with gangrene                                                |

Continued on next page



**Table23 – continued from previous page**

| CodeSystem | ConceptCode       | ConceptName                                               |
|------------|-------------------|-----------------------------------------------------------|
| SNOMED CT  | 33652004          | Lumbar hernia with obstruction                            |
| SNOMED CT  | 34021006          | Chronic duodenal ulcer with hemorrhage AND obstruction    |
| SNOMED CT  | 16840521000119100 | Partial obstruction of intestine following procedure      |
| SNOMED CT  | 16840581000119101 | Complete obstruction of intestine following procedure     |
| SNOMED CT  | 196658005         | Acute duodenal ulcer with obstruction                     |
| SNOMED CT  | 196666001         | Chronic duodenal ulcer with obstruction                   |
| SNOMED CT  | 196712004         | Acute gastrojejunal ulcer with obstruction                |
| SNOMED CT  | 196719008         | Chronic gastrojejunal ulcer with obstruction              |
| SNOMED CT  | 196807006         | Obstructed inguinal hernia                                |
| SNOMED CT  | 196835005         | Obstructed femoral hernia                                 |
| SNOMED CT  | 196859000         | Obstructed umbilical hernia                               |
| SNOMED CT  | 196861009         | Paraumbilical hernia with obstruction                     |
| SNOMED CT  | 196884002         | Incisional hernia with obstruction but no gangrene        |
| SNOMED CT  | 196885001         | Obstructed epigastric hernia                              |
| SNOMED CT  | 196917000         | Obstructed gluteal hernia                                 |
| SNOMED CT  | 196956006         | Obstructed Spigelian hernia                               |
| SNOMED CT  | 197006009         | Superior mesenteric artery syndrome                       |
| SNOMED CT  | 197052002         | Multiple intussusception                                  |
| SNOMED CT  | 197058003         | Volvulus of small intestine                               |
| SNOMED CT  | 197059006         | Volvulus of the ileocecum                                 |
| SNOMED CT  | 197060001         | Sigmoid volvulus                                          |
| SNOMED CT  | 197063004         | Enterolith                                                |
| SNOMED CT  | 1171359008        | Intestinal obstruction due to adhesion of small intestine |
| SNOMED CT  | 1162728008        | Intestinal obstruction due to stricture of intestine      |
| SNOMED CT  | 1162567000        | Postoperative paralytic ileus                             |
| SNOMED CT  | 206523001         | Meconium ileus                                            |
| SNOMED CT  | 206528005         | Meconium plug                                             |
| SNOMED CT  | 206529002         | Congenital fecaliths causing obstruction                  |
| SNOMED CT  | 235806008         | Arteriomesenteric compression of duodenojejunal flexure   |
| SNOMED CT  | 235810006         | Bolus obstruction of intestine                            |
| SNOMED CT  | 235811005         | Cecal volvulus                                            |
| SNOMED CT  | 235820001         | Ileo-sigmoid knotting                                     |
| SNOMED CT  | 235821002         | Postoperative intestinal obstruction                      |
| SNOMED CT  | 235822009         | Postoperative mechanical intestinal obstruction           |
| SNOMED CT  | 235833007         | Postoperative ileus                                       |
| SNOMED CT  | 235834001         | Infection-induced ileus                                   |
| SNOMED CT  | 235835000         | Neural reflex-induced ileus                               |
| SNOMED CT  | 235836004         | Metabolic ileus                                           |
| SNOMED CT  | 235837008         | Drug-induced ileus                                        |
| SNOMED CT  | 721652009         | Gallstone ileus of small intestine                        |
| SNOMED CT  | 721653004         | Enterolith of small intestine                             |
| SNOMED CT  | 721678000         | Gallstone ileus of large intestine                        |
| SNOMED CT  | 721679008         | Paralytic ileus of large intestine                        |

Continued on next page

**Table23 – continued from previous page**

| CodeSystem | ConceptCode   | ConceptName                                                                 |
|------------|---------------|-----------------------------------------------------------------------------|
| SNOMED CT  | 722540008     | Volvulus of large intestine                                                 |
| SNOMED CT  | 722764006     | Obstructed parastomal hernia                                                |
| SNOMED CT  | 722841004     | Perforation of intestine co-occurrent and due to meconium ileus             |
| SNOMED CT  | 722844007     | Obstruction of small intestine co-occurrent and due to peritoneal adhesions |
| SNOMED CT  | 722856008     | Obstruction of large intestine co-occurrent and due to peritoneal adhesions |
| SNOMED CT  | 733145007     | Neonatal obstruction of intestine                                           |
| SNOMED CT  | 733149001     | Obstructive ileus of small intestine with impaction                         |
| SNOMED CT  | 733447005     | Intestinal obstruction in newborn due to guanylate cyclase 2C deficiency    |
| SNOMED CT  | 735722005     | Neonatal intestinal perforation with in utero intraluminal obstruction      |
| SNOMED CT  | 741061001     | Obstructed recurrent right femoral hernia with gangrene                     |
| SNOMED CT  | 741515006     | Obstructed recurrent left femoral hernia with gangrene                      |
| SNOMED CT  | 766942007     | Complete obstruction of colon                                               |
| SNOMED CT  | 766943002     | Complete obstruction of intestine                                           |
| SNOMED CT  | 767684006     | Obstructed recurrent left inguinal hernia with gangrene                     |
| SNOMED CT  | 767685007     | Obstructed recurrent right inguinal hernia with gangrene                    |
| SNOMED CT  | 767748008     | Obstructed bilateral inguinal hernia                                        |
| SNOMED CT  | 767823004     | Obstructed left inguinal hernia with gangrene                               |
| SNOMED CT  | 767824005     | Obstructed right inguinal hernia with gangrene                              |
| SNOMED CT  | 767995003     | Obstructed right femoral hernia with gangrene                               |
| SNOMED CT  | 767996002     | Obstructed left femoral hernia with gangrene                                |
| SNOMED CT  | 772139001     | Obstructed left femoral hernia                                              |
| SNOMED CT  | 772140004     | Obstructed right femoral hernia                                             |
| SNOMED CT  | 772141000     | Obstructed recurrent right inguinal hernia                                  |
| SNOMED CT  | 772142007     | Obstructed recurrent left inguinal hernia                                   |
| SNOMED CT  | 772143002     | Obstructed left inguinal hernia                                             |
| SNOMED CT  | 772144008     | Obstructed right inguinal hernia                                            |
| SNOMED CT  | 772149003     | Obstructed recurrent bilateral inguinal hernia                              |
| SNOMED CT  | 772781000     | Obstructed recurrent bilateral femoral hernia                               |
| SNOMED CT  | 772782007     | Obstructed recurrent right femoral hernia                                   |
| SNOMED CT  | 772783002     | Obstructed recurrent left femoral hernia                                    |
| SNOMED CT  | 773269009     | Obstructed perineal hernia                                                  |
| SNOMED CT  | 782504002     | Intestinal obstruction due to recurrent umbilical hernia                    |
| SNOMED CT  | 782505001     | Obstructed recurrent femoral hernia                                         |
| SNOMED CT  | 817966005     | Distal intestinal obstruction syndrome due to cystic fibrosis               |
| SNOMED CT  | 8631000119105 | Intestinal obstruction due to bilateral inguinal hernia                     |
| SNOMED CT  | 8651000119104 | Intestinal obstruction due to bilateral recurrent femoral hernia            |

Continued on next page

**Table23 – continued from previous page**

| CodeSystem | ConceptCode       | ConceptName                                                                |
|------------|-------------------|----------------------------------------------------------------------------|
| SNOMED CT  | 8661000119102     | Intestinal obstruction due to bilateral recurrent inguinal hernia          |
| SNOMED CT  | 95001000119103    | Obstructed recurrent inguinal hernia                                       |
| SNOMED CT  | 1083751000119104  | Obstructed bilateral femoral hernia                                        |
| SNOMED CT  | 1084511000119108  | Intestinal obstruction due to recurrent irreducible inguinal hernia        |
| SNOMED CT  | 1084521000119101  | Obstructed recurrent irreducible bilateral inguinal hernia                 |
| SNOMED CT  | 1085161000119102  | Intestinal obstruction due to chronic ulcerative pancolitis                |
| SNOMED CT  | 1085211000119105  | Intestinal obstruction due to chronic ulcerative proctitis                 |
| SNOMED CT  | 1085261000119108  | Intestinal obstruction due to chronic ulcerative rectosigmoiditis          |
| SNOMED CT  | 1085421000119104  | Intestinal obstruction due to colonic inflammatory polyps                  |
| SNOMED CT  | 1085781000119107  | Intestinal obstruction due to Crohn's disease of large intestine           |
| SNOMED CT  | 1085831000119104  | Intestinal obstruction due to Crohn's disease of small and large intestine |
| SNOMED CT  | 1085881000119103  | Intestinal obstruction due to Crohn's disease of small intestine           |
| SNOMED CT  | 1085931000119108  | Intestinal obstruction due to Crohn's disease                              |
| SNOMED CT  | 1087271000119105  | Intestinal obstruction co-occurrent and due to incisional hernia           |
| SNOMED CT  | 1092871000119107  | Intestinal obstruction due to ulcerative colitis                           |
| SNOMED CT  | 16833871000119109 | Partial obstruction of colon                                               |
| SNOMED CT  | 84739008          | Perineal hernia with obstruction                                           |
| SNOMED CT  | 440663004         | Encapsulating peritoneal sclerosis associated with peritoneal dialysis     |
| SNOMED CT  | 447320006         | Food bolus obstruction of intestine                                        |
| SNOMED CT  | 458422009         | Malrotation of intestine with midgut volvulus                              |
| SNOMED CT  | 698733009         | Intestinal obstruction due to tuberculosis                                 |
| SNOMED CT  | 414398007         | Hernia of anterior abdominal wall with obstruction AND gangrene            |
| SNOMED CT  | 414476004         | Obstructed ventral incisional hernia with gangrene                         |
| SNOMED CT  | 414923000         | Obstructed hernia of anterior abdominal wall                               |
| SNOMED CT  | 414924006         | Obstructed incisional ventral hernia                                       |
| SNOMED CT  | 415253006         | Obstructed recurrent hernia of anterior abdominal wall                     |
| SNOMED CT  | 415256003         | Obstructed recurrent incisional hernia of anterior abdominal wall          |
| SNOMED CT  | 253786009         | Congenital volvulus                                                        |
| SNOMED CT  | 271575002         | Inspissated stool syndrome                                                 |
| SNOMED CT  | 276520008         | Transitory ileus of prematurity                                            |
| SNOMED CT  | 276521007         | Perinatal intestinal obstruction                                           |
| SNOMED CT  | 37976006          | Gallstone ileus                                                            |
| SNOMED CT  | 40650009          | Obstruction of colon                                                       |

Continued on next page

**Table23 – continued from previous page**

| CodeSystem | ConceptCode       | ConceptName                                                                                 |
|------------|-------------------|---------------------------------------------------------------------------------------------|
| SNOMED CT  | 41585009          | Strangulation of colon                                                                      |
| SNOMED CT  | 41916005          | Paraumbilical hernia with gangrene AND obstruction                                          |
| SNOMED CT  | 41986000          | Acute duodenal ulcer with hemorrhage, with perforation AND with obstruction                 |
| SNOMED CT  | 42140004          | Obstructed recurrent bilateral inguinal hernia with gangrene                                |
| SNOMED CT  | 42698006          | Gastrojejunal ulcer with hemorrhage AND obstruction                                         |
| SNOMED CT  | 45989004          | Obstructed femoral hernia with gangrene                                                     |
| SNOMED CT  | 47152002          | Gastrojejunal ulcer without hemorrhage AND without perforation but with obstruction         |
| SNOMED CT  | 49678000          | Obstructed inguinal hernia with gangrene                                                    |
| SNOMED CT  | 52232007          | Chronic duodenal ileus                                                                      |
| SNOMED CT  | 54798007          | Gastrojejunal ulcer with hemorrhage, with perforation and with obstruction                  |
| SNOMED CT  | 54842003          | Intestinal obstruction by inspissated milk in newborn                                       |
| SNOMED CT  | 55525008          | Paralytic ileus                                                                             |
| SNOMED CT  | 56579005          | Chronic gastrojejunal ulcer without hemorrhage AND without perforation but with obstruction |
| SNOMED CT  | 57265009          | Congenital obstruction of large intestine                                                   |
| SNOMED CT  | 58711008          | Acute gastrojejunal ulcer with hemorrhage, with perforation and with obstruction            |
| SNOMED CT  | 59658000          | Epigastric hernia with gangrene AND obstruction                                             |
| SNOMED CT  | 60551006          | Chronic duodenal ulcer with perforation AND obstruction                                     |
| SNOMED CT  | 61456005          | Obturator hernia with obstruction                                                           |
| SNOMED CT  | 62936002          | Acute duodenal ulcer with perforation AND obstruction                                       |
| SNOMED CT  | 67766009          | Intestinal adhesions with obstruction                                                       |
| SNOMED CT  | 68126001          | Obstructed bilateral femoral hernia with gangrene                                           |
| SNOMED CT  | 72219001          | Acute gastrojejunal ulcer with perforation AND obstruction                                  |
| SNOMED CT  | 72408002          | Acute gastrojejunal ulcer with hemorrhage and obstruction                                   |
| SNOMED CT  | 73225005          | Ischiatic hernia with obstruction                                                           |
| SNOMED CT  | 75342000          | Acute duodenal ulcer without hemorrhage AND without perforation but with obstruction        |
| SNOMED CT  | 75419006          | Chronic partial afferent loop obstruction                                                   |
| SNOMED CT  | 77410006          | Duodenal ulcer with perforation AND obstruction                                             |
| SNOMED CT  | 79812002          | Volvulus of duodenum                                                                        |
| SNOMED CT  | 16840431000119101 | Partial obstruction of intestine due to peritoneal adhesions                                |
| SNOMED CT  | 1144423005        | Strangulation of small intestine                                                            |
| SNOMED CT  | 1148568006        | Volvulus of jejunum                                                                         |
| SNOMED CT  | 1197665000        | Enterolith of large intestine                                                               |
| SNOMED CT  | 1197677005        | Paralytic ileus of small intestine                                                          |
| SNOMED CT  | 1197679008        | Paralytic ileus of small intestine and colon                                                |
| SNOMED CT  | 1197723003        | Postoperative obstruction of large intestine                                                |
| SNOMED CT  | 1197725005        | Postoperative obstruction of small intestine                                                |

Continued on next page

**Table23 – continued from previous page**

| CodeSystem | ConceptCode | ConceptName                                                                               |
|------------|-------------|-------------------------------------------------------------------------------------------|
| SNOMED CT  | 82368005    | Transitory ileus of newborn                                                               |
| SNOMED CT  | 85836000    | Congenital duodenal obstruction due to annular pancreas                                   |
| SNOMED CT  | 86092005    | Cystic fibrosis with meconium ileus                                                       |
| SNOMED CT  | 86258000    | Chronic duodenal ulcer with hemorrhage, with perforation AND with obstruction             |
| SNOMED CT  | 87756006    | Acute duodenal ulcer with hemorrhage AND obstruction                                      |
| SNOMED CT  | 90257004    | Chronic gastrojejunal ulcer with hemorrhage and obstruction                               |
| SNOMED CT  | 95532008    | Obstruction of duodenum                                                                   |
| SNOMED CT  | 95625008    | Paralytic ileus of the newborn                                                            |
| SNOMED CT  | 95626009    | Spastic ileus of the newborn                                                              |
| SNOMED CT  | 129601002   | Congenital neurogenic ileus syndrome                                                      |
| ICD10CM    | K56         | Paralytic ileus and intestinal obstruction without hernia                                 |
| ICD10CM    | K56.6       | Other and unspecified intestinal obstruction                                              |
| ICD10CM    | K56.60      | Unspecified intestinal obstruction                                                        |
| ICD10CM    | K56.600     | Partial intestinal obstruction, unspecified as to cause                                   |
| ICD10CM    | K56.601     | Complete intestinal obstruction, unspecified as to cause                                  |
| ICD10CM    | K56.609     | Unspecified intestinal obstruction, unspecified as to partial versus complete obstruction |
| ICD10CM    | K56.69      | Other intestinal obstruction                                                              |
| ICD10CM    | K56.690     | Other partial intestinal obstruction                                                      |
| ICD10CM    | K56.691     | Other complete intestinal obstruction                                                     |
| ICD10CM    | K56.699     | Other intestinal obstruction unspecified as to partial versus complete obstruction        |
| ICD10CM    | K56.0       | Paralytic ileus                                                                           |
| ICD10CM    | K56.1       | Intussusception                                                                           |
| ICD10CM    | K56.2       | Volvulus                                                                                  |
| ICD10CM    | K56.3       | Gallstone ileus                                                                           |
| ICD10CM    | K56.4       | Other impaction of intestine                                                              |
| ICD10CM    | K56.41      | Fecal impaction                                                                           |
| ICD10CM    | K56.49      | Other impaction of intestine                                                              |
| ICD10CM    | K56.5       | Intestinal adhesions [bands] with obstruction (postinfection)                             |
| ICD10CM    | K56.50      | Intestinal adhesions [bands], unspecified as to partial versus complete obstruction       |
| ICD10CM    | K56.51      | Intestinal adhesions [bands], with partial obstruction                                    |
| ICD10CM    | K56.52      | Intestinal adhesions [bands] with complete obstruction                                    |
| ICD10CM    | K56.7       | Ileus, unspecified                                                                        |
| ICD9CM     | 560.8       | Other specified intestinal obstruction                                                    |
| ICD9CM     | 560.89      | Other specified intestinal obstruction                                                    |
| ICD9CM     | 560.9       | Unspecified intestinal obstruction                                                        |
| ICD9CM     | 560.81      | Intestinal or peritoneal adhesions with obstruction (postoperative) (postinfection)       |

Continued on next page

**Table23 – continued from previous page**

| CodeSystem | ConceptCode | ConceptName |
|------------|-------------|-------------|
|------------|-------------|-------------|

**1.7.2 Cholecystitis**

Table 24: Concept codes used to identify cholecystitis adverse events.

| CodeSystem | ConceptCode      | ConceptName                                                                                   |
|------------|------------------|-----------------------------------------------------------------------------------------------|
| SNOMED CT  | 12932003         | Calculus of common bile duct with chronic cholecystitis with obstruction                      |
| SNOMED CT  | 15082003         | Calculus of bile duct with chronic cholecystitis with obstruction                             |
| SNOMED CT  | 19335008         | Calculus of cystic duct with acute cholecystitis                                              |
| SNOMED CT  | 19968009         | Cholecystitis without calculus                                                                |
| SNOMED CT  | 20824003         | Chronic cholecystitis                                                                         |
| SNOMED CT  | 25924004         | Calculus of gallbladder with cholecystitis                                                    |
| SNOMED CT  | 29484002         | Cholelithiasis AND cholecystitis without obstruction                                          |
| SNOMED CT  | 32067005         | Acute emphysematous cholecystitis                                                             |
| SNOMED CT  | 34346002         | Acute cholecystitis without calculus                                                          |
| SNOMED CT  | 197377009        | Gallbladder calculus with acute cholecystitis and no obstruction                              |
| SNOMED CT  | 197378004        | Gallbladder calculus with acute cholecystitis and obstruction                                 |
| SNOMED CT  | 197389006        | Bile duct calculus with acute cholecystitis                                                   |
| SNOMED CT  | 197391003        | Bile duct calculus with acute cholecystitis and obstruction                                   |
| SNOMED CT  | 722869007        | Calculus of gallbladder without cholecystitis or cholangitis                                  |
| SNOMED CT  | 38871000119104   | Acute and chronic cholecystitis co-occurrent and due to calculus of gallbladder and bile duct |
| SNOMED CT  | 40331000119107   | Acute cholecystitis due to biliary calculus                                                   |
| SNOMED CT  | 435121000124109  | Calculus of gallbladder and bile duct with cholecystitis                                      |
| SNOMED CT  | 435131000124107  | Calculus of gallbladder and bile duct with acute cholecystitis                                |
| SNOMED CT  | 435161000124103  | Calculus of gallbladder and bile duct with acute and chronic cholecystitis                    |
| SNOMED CT  | 1084931000119109 | Chronic cholecystitis due to cholelithiasis co-occurrent with choledocholithiasis             |
| SNOMED CT  | 1084971000119107 | Chronic cholecystitis due to gallbladder calculus with obstruction                            |
| SNOMED CT  | 50450007         | Gallstone AND cholecystitis with obstruction                                                  |
| SNOMED CT  | 448286002        | Xanthogranulomatous cholecystitis                                                             |
| SNOMED CT  | 699050007        | Calculus of gallbladder with acute and chronic cholecystitis                                  |
| SNOMED CT  | 314949006        | Perforated calculous chronic cholecystitis                                                    |

Continued on next page

**Table24 – continued from previous page**

| CodeSystem | ConceptCode | ConceptName                                                                 |
|------------|-------------|-----------------------------------------------------------------------------|
| SNOMED CT  | 396335001   | Acute and chronic cholecystitis                                             |
| SNOMED CT  | 36483003    | Calculus of bile duct with cholecystitis                                    |
| SNOMED CT  | 46341007    | Cholecystitis glandularis proliferans                                       |
| SNOMED CT  | 48413001    | Acute hemorrhagic cholecystitis                                             |
| SNOMED CT  | 49341008    | Calculus of cystic duct with cholecystitis                                  |
| SNOMED CT  | 53928001    | Chronic cholecystitis without calculus                                      |
| SNOMED CT  | 59771005    | Calculus of gallbladder with acute cholecystitis                            |
| SNOMED CT  | 60127009    | Calculus of bile duct with acute cholecystitis without obstruction          |
| SNOMED CT  | 64534006    | Hyperplastic cholecystitis                                                  |
| SNOMED CT  | 65275009    | Acute cholecystitis                                                         |
| SNOMED CT  | 68368005    | Calculus of common bile duct with chronic cholecystitis                     |
| SNOMED CT  | 71745007    | Calculus of bile duct with chronic cholecystitis without obstruction        |
| SNOMED CT  | 72053008    | Calculus of common bile duct with acute cholecystitis without obstruction   |
| SNOMED CT  | 72533002    | Acute gangrenous cholecystitis                                              |
| SNOMED CT  | 74091007    | Calculus of common bile duct with chronic cholecystitis without obstruction |
| SNOMED CT  | 76581006    | Cholecystitis                                                               |
| SNOMED CT  | 81115009    | Calculus of common bile duct with acute cholecystitis with obstruction      |
| SNOMED CT  | 89251007    | Calculus of common bile duct with acute cholecystitis                       |
| SNOMED CT  | 89628003    | Acute suppurative cholecystitis                                             |
| SNOMED CT  | 91316003    | Calculus of bile duct with chronic cholecystitis                            |
| SNOMED CT  | 95558008    | Pneumocholecystitis                                                         |
| SNOMED CT  | 95559000    | Chronic cholecystitis with calculus                                         |
| SNOMED CT  | 1269314004  | Perforation of gallbladder due to chronic cholecystitis with calculus       |
| SNOMED CT  | 197410004   | Acute angiocholecystitis                                                    |
| SNOMED CT  | 73125001    | Empyema of gallbladder                                                      |
| SNOMED CT  | 78754002    | Angiocholecystitis                                                          |

### 1.7.3 Cholelithiasis

Table 25: Concept codes used to identify cholelithiasis adverse events.

| CodeSystem | ConceptCode | ConceptName                                          |
|------------|-------------|------------------------------------------------------|
| SNOMED CT  | 25924004    | Calculus of gallbladder with cholecystitis           |
| SNOMED CT  | 29484002    | Cholelithiasis AND cholecystitis without obstruction |

Continued on next page

**Table25 – continued from previous page**

| CodeSystem | ConceptCode      | ConceptName                                                                                   |
|------------|------------------|-----------------------------------------------------------------------------------------------|
| SNOMED CT  | 197377009        | Gallbladder calculus with acute cholecystitis and no obstruction                              |
| SNOMED CT  | 197378004        | Gallbladder calculus with acute cholecystitis and obstruction                                 |
| SNOMED CT  | 38871000119104   | Acute and chronic cholecystitis co-occurrent and due to calculus of gallbladder and bile duct |
| SNOMED CT  | 1084931000119109 | Chronic cholecystitis due to cholelithiasis co-occurrent with choledocholithiasis             |
| SNOMED CT  | 50450007         | Gallstone AND cholecystitis with obstruction                                                  |
| SNOMED CT  | 699050007        | Calculus of gallbladder with acute and chronic cholecystitis                                  |
| SNOMED CT  | 715577009        | Low phospholipid associated cholelithiasis                                                    |
| SNOMED CT  | 266474003        | Biliary calculus                                                                              |
| SNOMED CT  | 59771005         | Calculus of gallbladder with acute cholecystitis                                              |
| SNOMED CT  | 70342003         | Cholelithiasis without obstruction                                                            |
| SNOMED CT  | 77528005         | Cholelithiasis with obstruction                                                               |
| SNOMED CT  | 1356007          | Calculus of common duct with obstruction                                                      |
| SNOMED CT  | 4661003          | Calculus of bile duct with obstruction                                                        |
| SNOMED CT  | 6087002          | Calculus of hepatic duct with obstruction                                                     |
| SNOMED CT  | 7290007          | Impacted gallstone of cystic duct                                                             |
| SNOMED CT  | 12932003         | Calculus of common bile duct with chronic cholecystitis with obstruction                      |
| SNOMED CT  | 15082003         | Calculus of bile duct with chronic cholecystitis with obstruction                             |
| SNOMED CT  | 19335008         | Calculus of cystic duct with acute cholecystitis                                              |
| SNOMED CT  | 1234821002       | Primary intrahepatic lithiasis                                                                |
| SNOMED CT  | 27123005         | Biliary sludge                                                                                |
| SNOMED CT  | 27697003         | Calculus of hepatic duct without obstruction                                                  |
| SNOMED CT  | 30093007         | Calculus of bile duct                                                                         |
| SNOMED CT  | 1269314004       | Perforation of gallbladder due to chronic cholecystitis with calculus                         |
| SNOMED CT  | 94611000119105   | Gallbladder calculus during pregnancy                                                         |
| SNOMED CT  | 1162777000       | Obstruction of ampulla of Vater by calculus                                                   |
| SNOMED CT  | 197389006        | Bile duct calculus with acute cholecystitis                                                   |
| SNOMED CT  | 197391003        | Bile duct calculus with acute cholecystitis and obstruction                                   |
| SNOMED CT  | 197402000        | Calculus of bile duct with cholangitis                                                        |
| SNOMED CT  | 235919008        | Gallstone                                                                                     |
| SNOMED CT  | 235923000        | Retained bile duct stone                                                                      |
| SNOMED CT  | 168036006        | O/E: gallstone                                                                                |
| SNOMED CT  | 168037002        | O/E: cholesterol gallstone                                                                    |
| SNOMED CT  | 168038007        | O/E: pigment gallstone                                                                        |
| SNOMED CT  | 722869007        | Calculus of gallbladder without cholecystitis or cholangitis                                  |
| SNOMED CT  | 735467004        | Cholangitis co-occurrent and due to calculus of gallbladder                                   |
| SNOMED CT  | 735734002        | Calculus of bile duct without inflammation of biliary tract                                   |

Continued on next page



**Table25 – continued from previous page**

| CodeSystem | ConceptCode       | ConceptName                                                                 |
|------------|-------------------|-----------------------------------------------------------------------------|
| SNOMED CT  | 830074003         | Cholesterol calculus of gallbladder                                         |
| SNOMED CT  | 830075002         | Pigment calculus of gallbladder                                             |
| SNOMED CT  | 40331000119107    | Acute cholecystitis due to biliary calculus                                 |
| SNOMED CT  | 435121000124109   | Calculus of gallbladder and bile duct with cholecystitis                    |
| SNOMED CT  | 435131000124107   | Calculus of gallbladder and bile duct with acute cholecystitis              |
| SNOMED CT  | 435161000124103   | Calculus of gallbladder and bile duct with acute and chronic cholecystitis  |
| SNOMED CT  | 435211000124107   | Calculus of common bile duct with acute pancreatitis                        |
| SNOMED CT  | 10754781000119108 | Gallbladder calculus in mother complicating childbirth                      |
| SNOMED CT  | 711564007         | Cholecystolithiasis with obstruction                                        |
| SNOMED CT  | 718309005         | Calculus of common bile duct without obstruction                            |
| SNOMED CT  | 307132003         | Common bile duct calculus                                                   |
| SNOMED CT  | 312110005         | Gallbladder and bile duct calculi                                           |
| SNOMED CT  | 314949006         | Perforated calculous chronic cholecystitis                                  |
| SNOMED CT  | 413197000         | Calculus of cystic stump                                                    |
| SNOMED CT  | 36483003          | Calculus of bile duct with cholecystitis                                    |
| SNOMED CT  | 49341008          | Calculus of cystic duct with cholecystitis                                  |
| SNOMED CT  | 55479002          | Impacted gallstone of gallbladder                                           |
| SNOMED CT  | 59049008          | Calculus of hepatic duct                                                    |
| SNOMED CT  | 60127009          | Calculus of bile duct with acute cholecystitis without obstruction          |
| SNOMED CT  | 62809003          | Calculus of cystic duct with obstruction                                    |
| SNOMED CT  | 65082000          | Calculus of cystic duct                                                     |
| SNOMED CT  | 68368005          | Calculus of common bile duct with chronic cholecystitis                     |
| SNOMED CT  | 68394001          | Calculus of bile duct without obstruction                                   |
| SNOMED CT  | 68601009          | Calculus of cystic duct without obstruction                                 |
| SNOMED CT  | 71745007          | Calculus of bile duct with chronic cholecystitis without obstruction        |
| SNOMED CT  | 72053008          | Calculus of common bile duct with acute cholecystitis without obstruction   |
| SNOMED CT  | 74091007          | Calculus of common bile duct with chronic cholecystitis without obstruction |
| SNOMED CT  | 81115009          | Calculus of common bile duct with acute cholecystitis with obstruction      |
| SNOMED CT  | 1162565008        | Calculus of intrahepatic bile duct                                          |
| SNOMED CT  | 89251007          | Calculus of common bile duct with acute cholecystitis                       |
| SNOMED CT  | 91316003          | Calculus of bile duct with chronic cholecystitis                            |
| SNOMED CT  | 95559000          | Chronic cholecystitis with calculus                                         |

#### 1.7.4 Gastroenteritis

Table 26: Concept codes used to identify gastroenteritis adverse events.

| CodeSystem | ConceptCode       | ConceptName                                                                         |
|------------|-------------------|-------------------------------------------------------------------------------------|
| SNOMED CT  | 12463005          | Infectious gastroenteritis                                                          |
| SNOMED CT  | 12574004          | Noninfectious gastroenteritis                                                       |
| SNOMED CT  | 24789006          | Viral gastroenteritis due to Norwalk-like agent                                     |
| SNOMED CT  | 25374005          | Gastroenteritis                                                                     |
| SNOMED CT  | 26006005          | Allergic gastroenteritis                                                            |
| SNOMED CT  | 236063005         | Adenoviral gastroenteritis                                                          |
| SNOMED CT  | 713186008         | Gastroenteritis caused by drug                                                      |
| SNOMED CT  | 266081001         | Colitis, enteritis and gastroenteritis presumed infectious                          |
| SNOMED CT  | 266451002         | Allergic gastroenteritis and colitis                                                |
| SNOMED CT  | 359613008         | Acute infectious nonbacterial gastroenteritis                                       |
| SNOMED CT  | 36789003          | Acute infective gastroenteritis                                                     |
| SNOMED CT  | 69776003          | Acute gastroenteritis                                                               |
| SNOMED CT  | 111843007         | Viral gastroenteritis                                                               |
| SNOMED CT  | 27858009          | Clostridial gastroenteritis                                                         |
| SNOMED CT  | 33687004          | Dietetic gastroenteritis                                                            |
| SNOMED CT  | 196731005         | Gastroduodenitis                                                                    |
| SNOMED CT  | 197011006         | Radiation gastroenteritis                                                           |
| SNOMED CT  | 240332005         | Infantile gastroenteritis                                                           |
| SNOMED CT  | 735459007         | Gastrointestinal hypersensitivity caused by food                                    |
| SNOMED CT  | 765756007         | Benign infantile seizure with mild gastroenteritis syndrome                         |
| SNOMED CT  | 10628871000119101 | Gastroenteritis due to influenza                                                    |
| SNOMED CT  | 10628911000119103 | Gastroenteritis due to Influenza A virus                                            |
| SNOMED CT  | 415822001         | Viral gastroenteritis caused by Rotavirus                                           |
| SNOMED CT  | 421454008         | Infectious gastroenteritis with AIDS (acquired immunodeficiency syndrome)           |
| SNOMED CT  | 421983003         | Noninfectious gastroenteritis with AIDS (acquired immunodeficiency syndrome)        |
| SNOMED CT  | 142961000119108   | Gastroenteritis caused by H1N1 influenza                                            |
| SNOMED CT  | 707222009         | Epidemic gastroenteritis                                                            |
| SNOMED CT  | 707352004         | Institution-acquired gastroenteritis                                                |
| SNOMED CT  | 713180002         | Ischemic gastroenteritis                                                            |
| SNOMED CT  | 713570009         | Infectious gastroenteritis co-occurrent with human immunodeficiency virus infection |
| SNOMED CT  | 308119005         | Infantile viral gastroenteritis                                                     |
| SNOMED CT  | 312088007         | Fungal gastroenteritis                                                              |
| SNOMED CT  | 359651008         | Nonbacterial gastroenteritis of infant                                              |
| SNOMED CT  | 359804008         | Eosinophilic gastroenteritis                                                        |
| SNOMED CT  | 409506009         | Hemorrhagic gastroenteritis                                                         |
| SNOMED CT  | 416482004         | Food-borne gastroenteritis                                                          |
| SNOMED CT  | 283876006         | Astrovirus gastroenteritis                                                          |
| SNOMED CT  | 283877002         | Calicivirus gastroenteritis                                                         |

Continued on next page

**Table26 – continued from previous page**

| CodeSystem | ConceptCode | ConceptName                                                                         |
|------------|-------------|-------------------------------------------------------------------------------------|
| SNOMED CT  | 35974005    | Cryptococcal gastroenteritis                                                        |
| SNOMED CT  | 51338006    | Eosinophilic gastroenteropathy with food sensitivity                                |
| SNOMED CT  | 53954009    | Eosinophilic gastroenteropathy with predominant sub-serosal disease                 |
| SNOMED CT  | 57419008    | Gastroenteritis presumed infectious                                                 |
| SNOMED CT  | 63924002    | Eosinophilic gastroenteropathy with predominant mucosal disease                     |
| SNOMED CT  | 66160001    | Cryptosporidial gastroenteritis                                                     |
| SNOMED CT  | 67375008    | Eosinophilic gastroenteropathy with predominant muscle layer disease                |
| SNOMED CT  | 71583005    | Toxic gastroenteritis                                                               |
| Truveta    | 1215944     | Gastroenteritis due to severe acute respiratory syndrome coronavirus 2 (SARS-CoV-2) |
| SNOMED CT  | 1187631004  | Viral gastroenteritis caused by Sapovirus                                           |
| SNOMED CT  | 89030000    | Eosinophilic gastroenteropathy with collagen vascular disease                       |
| SNOMED CT  | 109814008   | Acute ulcerative gastroenteritis complicating pneumonia                             |

### 1.7.5 Gastroparesis

Table 27: Concept codes used to identify gastroparesis adverse events.

| CodeSystem | ConceptCode | ConceptName                                                     |
|------------|-------------|-----------------------------------------------------------------|
| SNOMED CT  | 34140002    | Diabetic gastroparesis                                          |
| SNOMED CT  | 235675006   | Gastroparesis syndrome                                          |
| SNOMED CT  | 424989000   | Diabetic gastroparesis associated with type 2 diabetes mellitus |
| SNOMED CT  | 425159004   | Diabetic gastroparesis associated with type 1 diabetes mellitus |
| SNOMED CT  | 713702000   | Gastroparesis due to type 1 diabetes mellitus                   |
| SNOMED CT  | 713703005   | Gastroparesis due to type 2 diabetes mellitus                   |
| SNOMED CT  | 713704004   | Gastroparesis due to diabetes mellitus                          |
| SNOMED CT  | 353821005   | Idiopathic gastroparesis                                        |
| SNOMED CT  | 75994008    | Nondiabetic gastroparesis                                       |
| SNOMED CT  | 77164002    | Gastroparesis syndrome                                          |
| SNOMED CT  | 235676007   | Delayed gastric emptying following procedure                    |
| ICD9CM     | 536.3       | Gastroparesis                                                   |
| ICD10CM    | K31.84      | Gastroparesis                                                   |

### 1.7.6 Pancreatitis

Table 28: Concept codes used to identify pancreatitis adverse events.

| CodeSystem | ConceptCode     | ConceptName                                          |
|------------|-----------------|------------------------------------------------------|
| SNOMED CT  | 4399003         | Acute hemorrhagic pancreatitis                       |
| SNOMED CT  | 7881005         | Acute necrotizing pancreatitis                       |
| SNOMED CT  | 8551005         | Recurrent acute pancreatitis                         |
| SNOMED CT  | 15974001        | Chronic pancreatitis                                 |
| SNOMED CT  | 24407009        | Suppurative pancreatitis                             |
| SNOMED CT  | 197456007       | Acute pancreatitis                                   |
| SNOMED CT  | 197457003       | Acute pancreatitis unspecified                       |
| SNOMED CT  | 197458008       | Acute recurrent pancreatitis                         |
| SNOMED CT  | 197459000       | Acute hemorrhagic pancreatitis                       |
| SNOMED CT  | 197460005       | Acute suppurative pancreatitis                       |
| SNOMED CT  | 197461009       | Pancreatitis (& [acute NOS])                         |
| SNOMED CT  | 197462002       | Chronic pancreatitis                                 |
| SNOMED CT  | 197565003       | [X]Other chronic pancreatitis                        |
| SNOMED CT  | 233005009       | Painless pancreatitis                                |
| SNOMED CT  | 233870001       | Recurrent pancreatitis                               |
| SNOMED CT  | 234689009       | Relapsing pancreatitis                               |
| SNOMED CT  | 235494005       | Chronic pancreatitis                                 |
| SNOMED CT  | 235941008       | Gallstone acute pancreatitis                         |
| SNOMED CT  | 235943006       | Idiopathic acute pancreatitis                        |
| SNOMED CT  | 235944000       | Drug-induced acute pancreatitis                      |
| SNOMED CT  | 235945004       | Acute pancreatitis due to infection                  |
| SNOMED CT  | 235946003       | Viral acute pancreatitis                             |
| SNOMED CT  | 235949005       | Familial acute pancreatitis                          |
| SNOMED CT  | 235951009       | Gallstone chronic pancreatitis                       |
| SNOMED CT  | 235953007       | Idiopathic chronic pancreatitis                      |
| SNOMED CT  | 235954001       | Obstructive chronic pancreatitis                     |
| SNOMED CT  | 235955000       | Drug-induced chronic pancreatitis                    |
| SNOMED CT  | 155834006       | Acute pancreatitis                                   |
| SNOMED CT  | 155835007       | Chronic pancreatitis                                 |
| SNOMED CT  | 721724009       | Acute on chronic pancreatitis                        |
| SNOMED CT  | 722544004       | Pancreatitis due to pancreatic duct obstruction      |
| SNOMED CT  | 722871007       | Groove pancreatitis                                  |
| SNOMED CT  | 722872000       | Autoimmune pancreatitis type 1                       |
| SNOMED CT  | 838375006       | Chronic infectious pancreatitis                      |
| SNOMED CT  | 96081000119101  | Acute pancreatitis due to common bile duct calculus  |
| SNOMED CT  | 435211000124107 | Calculus of common bile duct with acute pancreatitis |
| SNOMED CT  | 448542008       | Autoimmune pancreatitis                              |
| SNOMED CT  | 393591004       | Pancreatitis                                         |
| SNOMED CT  | 394519007       | Gallstone acute pancreatitis                         |
| SNOMED CT  | 394520001       | Gallstone chronic pancreatitis                       |
| SNOMED CT  | 266476001       | Acute pancreatitis NOS                               |

Continued on next page

**Table28 – continued from previous page**

| CodeSystem | ConceptCode     | ConceptName                                                            |
|------------|-----------------|------------------------------------------------------------------------|
| SNOMED CT  | 301009006       | Calcific chronic pancreatitis                                          |
| SNOMED CT  | 39205007        | Infectious pancreatitis                                                |
| SNOMED CT  | 39726008        | Acute pancreatitis                                                     |
| SNOMED CT  | 44636008        | Interstitial pancreatitis                                              |
| SNOMED CT  | 46626002        | Subcutaneous nodular fat necrosis in pancreatitis                      |
| SNOMED CT  | 59154002        | Subacute pancreatitis                                                  |
| SNOMED CT  | 59329007        | Metabolic pancreatitis                                                 |
| SNOMED CT  | 75694006        | Pancreatitis                                                           |
| SNOMED CT  | 95563007        | Gallstone pancreatitis                                                 |
| SNOMED CT  | 123289004       | Relapsing pancreatitis                                                 |
| SNOMED CT  | 303002          | Apoplectic pancreatitis                                                |
| SNOMED CT  | 10665004        | Mumps pancreatitis                                                     |
| SNOMED CT  | 1263995002      | Chronic pancreatitis due to gallbladder calculus                       |
| SNOMED CT  | 1197711009      | Acute ischemic pancreatitis                                            |
| SNOMED CT  | 234367000       | Pancytopenia with pancreatitis                                         |
| SNOMED CT  | 235942001       | Alcohol-induced acute pancreatitis                                     |
| SNOMED CT  | 235947007       | Cytomegaloviral pancreatitis                                           |
| SNOMED CT  | 235948002       | Postoperative acute pancreatitis                                       |
| SNOMED CT  | 235950005       | Traumatic acute pancreatitis                                           |
| SNOMED CT  | 235956004       | Familial chronic pancreatitis                                          |
| SNOMED CT  | 724540009       | Tropical calcific chronic pancreatitis                                 |
| SNOMED CT  | 767291004       | Chronic pancreatitis due to acute alcohol intoxication                 |
| SNOMED CT  | 771446000       | Follicular cholangitis and pancreatitis                                |
| SNOMED CT  | 154211000119108 | Chronic pancreatitis due to chronic alcoholism                         |
| SNOMED CT  | 235952002       | Chronic pancreatitis due to acute alcohol intoxication                 |
| SNOMED CT  | 277537008       | Post-endoscopic retrograde cholangiopancreatography acute pancreatitis |
| SNOMED CT  | 399525009       | Inflammation of hepatopancreatic ampulla                               |
| SNOMED CT  | 445507008       | Alcohol-induced pancreatitis                                           |
| SNOMED CT  | 1197710005      | Acute pancreatitis due to systemic disease                             |
| SNOMED CT  | 68072000        | Hereditary pancreatitis                                                |
| SNOMED CT  | 74973004        | Chronic fibrosing pancreatitis                                         |
| SNOMED CT  | 878822006       | Ischemic pancreatitis                                                  |
| SNOMED CT  | 1197701002      | Type 1 autoimmune pancreatitis with extrapancreatic involvement        |
| SNOMED CT  | 1197740007      | Autoimmune pancreatitis type 2                                         |
| ICD10CM    | K85             | Acute pancreatitis                                                     |
| ICD10CM    | K85.0           | Idiopathic acute pancreatitis                                          |
| ICD10CM    | K85.00          | Idiopathic acute pancreatitis without necrosis or infection            |
| ICD10CM    | K85.01          | Idiopathic acute pancreatitis with uninfected necrosis                 |
| ICD10CM    | K85.02          | Idiopathic acute pancreatitis with infected necrosis                   |
| ICD10CM    | K85.1           | Biliary acute pancreatitis                                             |
| ICD10CM    | K85.10          | Biliary acute pancreatitis without necrosis or infection               |

Continued on next page

**Table28 – continued from previous page**

| CodeSystem | ConceptCode | ConceptName                                                      |
|------------|-------------|------------------------------------------------------------------|
| ICD10CM    | K85.11      | Biliary acute pancreatitis with uninfected necrosis              |
| ICD10CM    | K85.12      | Biliary acute pancreatitis with infected necrosis                |
| ICD10CM    | K85.3       | Drug induced acute pancreatitis                                  |
| ICD10CM    | K85.30      | Drug induced acute pancreatitis without necrosis or infection    |
| ICD10CM    | K85.31      | Drug induced acute pancreatitis with uninfected necrosis         |
| ICD10CM    | K85.32      | Drug induced acute pancreatitis with infected necrosis           |
| ICD10CM    | K85.8       | Other acute pancreatitis                                         |
| ICD10CM    | K85.80      | Other acute pancreatitis without necrosis or infection           |
| ICD10CM    | K85.81      | Other acute pancreatitis with uninfected necrosis                |
| ICD10CM    | K85.82      | Other acute pancreatitis with infected necrosis                  |
| ICD10CM    | K85.9       | Acute pancreatitis, unspecified                                  |
| ICD10CM    | K85.90      | Acute pancreatitis without necrosis or infection, unspecified    |
| ICD10CM    | K85.91      | Acute pancreatitis with uninfected necrosis, unspecified         |
| ICD10CM    | K85.92      | Acute pancreatitis with infected necrosis, unspecified           |
| ICD10CM    | K86.0       | Alcohol-induced chronic pancreatitis                             |
| ICD10CM    | K86.1       | Other chronic pancreatitis                                       |
| ICD10CM    | K85.2       | Alcohol induced acute pancreatitis                               |
| ICD10CM    | K85.20      | Alcohol induced acute pancreatitis without necrosis or infection |
| ICD10CM    | K85.21      | Alcohol induced acute pancreatitis with uninfected necrosis      |
| ICD10CM    | K85.22      | Alcohol induced acute pancreatitis with infected necrosis        |
| ICD9CM     | 577.0       | Acute pancreatitis                                               |
| ICD9CM     | 577.1       | Chronic pancreatitis                                             |
