# Supplementary material for: Semaglutide vs Tirzepatide for Weight Loss in Adults With Overweight or Obesity
Source: PubMed Central journal article supplement — JAMA Intern Med. 2024 Jul 8;184(9):1056–64. doi: 10.1001/jamainternmed.2024.2525 (PMC11231910; doi:10.1001/jamainternmed.2024.2525), 2024-07-08
Supplement: jamainternmed-e242525-s003.pdf [file jamainternmed-e242525-s003.pdf]

## Data Sharing Statement

### Data

**Data available:** Yes

**Data types:** Deidentified participant data, Data dictionary

**How to access data:** The data used in this study are available to all Truveta subscribers and may be accessed at [studio.truveta.com](https://studio.truveta.com).

**When available:** With publication

### Supporting Documents

**Document types:** Statistical/analytic code

**How to access documents:** All code used in this analysis may be accessed at [studio.truveta.com](https://studio.truveta.com).

**When available:** With publication

### Additional Information

**Who can access the data:** Data and code are available to Truveta subscribers.

**Types of analyses:** Data and code are available for any research purpose.

**Mechanisms of data availability:** All data and code are available to Truveta subscribers through [studio.truveta.com](https://studio.truveta.com). The mechanism for accessing data is through a Truveta subscription.

**Any additional restrictions:** Truveta data is available only for research purposes.
